# Supplementary material for: Proteome and Network Analysis Provides Novel Insights Into Developing and Established Chemotherapy-Induced Peripheral Neuropathy
Source: Front Pharmacol. 2022 Feb 18;13:818690. doi: 10.3389/fphar.2022.818690 (PMC8895144; doi:10.3389/fphar.2022.818690)
Supplement: Supplementary file 1 [file Table2.XLSX]

## Sheet: Pre-CIPN_final hit list
Candidate list of all protein groups that are dysregulated at pre-CIPN
Comparison (group1/group2)	Group	ProteinGroups				Pvalue	Qvalue	# of Ratios	UniProtIds	Genes	ProteinDescriptions	ProteinNames	# Unique Total Peptides	% Change	Ratio
Pre-CIPN/Vehicle	P04631	P04631				0.00159112	0.0290628	36	P04631	S100b	Protein S100-B	S100B_RAT	4	-62.8612	0.371388
Pre-CIPN/Vehicle	P11030;Q6TXF3	P11030	Q6TXF3			0.00380319	0.0427923	16	P11030;Q6TXF3	Dbi	Acyl-CoA-binding protein	ACBP_RAT;Q6TXF3_RAT	2	-54.1795	0.458205
Pre-CIPN/Vehicle	P21571	P21571				0.000178384	0.00652639	8	P21571	Atp5pf	ATP synthase-coupling factor 6, mitochondrial	ATP5J_RAT	2	-47.9115	0.520885
Pre-CIPN/Vehicle	P02651	P02651				0.00259171	0.0348807	12	P02651	Apoa4	Apolipoprotein A-IV	APOA4_RAT	3	-46.7643	0.532357
Pre-CIPN/Vehicle	A0A0G2KBC0;F8WFF9;Q5FVI3	A0A0G2KBC0	F8WFF9	Q5FVI3		0.0018092	0.0282637	12	A0A0G2KBC0;F8WFF9;Q5FVI3	Lrrc57	Leucine-rich repeat-containing protein 57	A0A0G2KBC0_RAT;F8WFF9_RAT;LRC57_RAT	3	-44.7596	0.552404
Pre-CIPN/Vehicle	P19132;Q66HI5	P19132	Q66HI5			0.00145251	0.0240702	28	P19132;Q66HI5	Fth1	Ferritin heavy chain;Ferritin	FRIH_RAT;Q66HI5_RAT	5	-43.6677	0.563323
Pre-CIPN/Vehicle	Q09426	Q09426				8.2122e-05	0.00408264	40	Q09426	Ugt8	2-hydroxyacylsphingosine 1-beta-galactosyltransferase	CGT_RAT	8	-39.0909	0.609091
Pre-CIPN/Vehicle	A0A0G2K761;D4A0H4	A0A0G2K761	D4A0H4			0.00113276	0.0204811	24	A0A0G2K761;D4A0H4	Cul2	Cullin 2	A0A0G2K761_RAT;D4A0H4_RAT	6	-38.6217	0.613783
Pre-CIPN/Vehicle	F1M7S4;P21961	F1M7S4	P21961			0.00449896	0.0468354	12	F1M7S4;P21961	Cpa3	Mast cell carboxypeptidase A;Mast cell carboxypeptidase A (Fragment)	F1M7S4_RAT;CBPA3_RAT	3	-36.8218	0.631782
Pre-CIPN/Vehicle	D3ZC89	D3ZC89				0.00249153	0.037582	8	D3ZC89	NaN	Uncharacterized protein	D3ZC89_RAT	2	-36.6141	0.633859		candidate excluded from comparisons with other datasets as no unique gene name is assigned
Pre-CIPN/Vehicle	P62329	P62329				0.00390851	0.0430952	16	P62329	Tmsb4x	Thymosin beta-4	TYB4_RAT	2	-35.9955	0.640045
Pre-CIPN/Vehicle	F1M4I1	F1M4I1				0.00250857	0.0375965	32	F1M4I1	NaN	Uncharacterized protein	F1M4I1_RAT	7	-34.9206	0.650794		candidate excluded from comparisons with other datasets as no unique gene name is assigned
Pre-CIPN/Vehicle	P02625	P02625				7.71921e-06	0.0007835	40	P02625	Pvalb	Parvalbumin alpha	PRVA_RAT	6	-34.411	0.65589
Pre-CIPN/Vehicle	D4ADF5	D4ADF5				0.00392739	0.0430952	16	D4ADF5	Pdcd5	Programmed cell death 5	D4ADF5_RAT	4	-33.898	0.66102
Pre-CIPN/Vehicle	B2GV73	B2GV73				0.00499267	0.0497576	24	B2GV73	Arpc3	Actin-related protein 2/3 complex subunit 3	B2GV73_RAT	4	-33.1791	0.668209
Pre-CIPN/Vehicle	P16975	P16975				9.14437e-05	0.00436778	64	P16975	Sparc	SPARC	SPRC_RAT	10	-32.4957	0.675043
Pre-CIPN/Vehicle	D3Z955	D3Z955				0.000569384	0.0137329	86	D3Z955	Pgm2l1	Phosphoglucomutase 2-like 1	D3Z955_RAT	18	-31.0345	0.689655
Pre-CIPN/Vehicle	A0A096MK73;P13668	A0A096MK73	P13668			0.000154472	0.00611832	28	A0A096MK73;P13668	Stmn1	Stathmin (Fragment);Stathmin	A0A096MK73_RAT;STMN1_RAT	4	-30.4752	0.695248
Pre-CIPN/Vehicle	Q6P9V7	Q6P9V7				0.00366676	0.0423	28	Q6P9V7	Psme1	Proteasome (Prosome, macropain) activator subunit 1	Q6P9V7_RAT	7	-30.4237	0.695763
Pre-CIPN/Vehicle	A0A0G2JUC7;Q6AYH5	A0A0G2JUC7	Q6AYH5			1.07257e-08	3.73254e-06	100	A0A0G2JUC7;Q6AYH5	Dctn2	Dynactin subunit 2	A0A0G2JUC7_RAT;DCTN2_RAT	18	-30.0337	0.699663
Pre-CIPN/Vehicle	P04639	P04639				0.00111115	0.0204811	88	P04639	Apoa1	Apolipoprotein A-I	APOA1_RAT	13	-29.3656	0.706344
Pre-CIPN/Vehicle	P19234	P19234				0.000151636	0.00611832	36	P19234	Ndufv2	NADH dehydrogenase [ubiquinone] flavoprotein 2, mitochondrial	NDUV2_RAT	7	-29.1139	0.708861
Pre-CIPN/Vehicle	A0A0G2KA95;D3ZPC4	A0A0G2KA95	D3ZPC4			0.000793211	0.0203563	48	A0A0G2KA95;D3ZPC4	L1cam	Neural cell adhesion molecule L1	A0A0G2KA95_RAT;D3ZPC4_RAT	11	-28.6748	0.713252
Pre-CIPN/Vehicle	P61212	P61212				0.00342106	0.0449351	32	P61212	Arl1	ADP-ribosylation factor-like protein 1	ARL1_RAT	7	-25.6716	0.743284
Pre-CIPN/Vehicle	P09495	P09495				0.000210738	0.00693657	44	P09495	Tpm4	Tropomyosin alpha-4 chain	TPM4_RAT	7	-25.5614	0.744386
Pre-CIPN/Vehicle	F7ES73	F7ES73				0.00351925	0.0450915	32	F7ES73	Nub1	Negative regulator of ubiquitin-like proteins 1	F7ES73_RAT	8	-24.3598	0.756402
Pre-CIPN/Vehicle	P0DP29;P0DP30;P0DP31	P0DP29	P0DP30	P0DP31		2.18301e-05	0.00175609	56	P0DP29;P0DP30;P0DP31	Calm1;Calm2;Calm3	Calmodulin-1;Calmodulin-2;Calmodulin-3	CALM1_RAT;CALM2_RAT;CALM3_RAT	7	-23.7796	0.762204
Pre-CIPN/Vehicle	O08839	O08839				0.00248918	0.034128	64	O08839	Bin1	Myc box-dependent-interacting protein 1	BIN1_RAT	11	-23.5392	0.764608
Pre-CIPN/Vehicle	A0A096MJS3;A0A096MK47	A0A096MJS3	A0A096MK47			0.000664711	0.0153275	52	A0A096MJS3;A0A096MK47	Mlip	Muscular LMNA-interacting protein (Fragment);Muscular LMNA-interacting protein	A0A096MJS3_RAT;MLIP_RAT	9	-22.8172	0.771828
Pre-CIPN/Vehicle	Q63083	Q63083				2.20931e-06	0.000277331	128	Q63083	Nucb1	Nucleobindin-1	NUCB1_RAT	22	-22.7928	0.772072
Pre-CIPN/Vehicle	Q642G4	Q642G4				0.00264929	0.0386596	20	Q642G4	Pex14	Peroxisomal membrane protein PEX14	PEX14_RAT	5	-22.7919	0.772081
Pre-CIPN/Vehicle	A0A0G2K2B3;M0R961;Q99PF5	A0A0G2K2B3	M0R961	Q99PF5		0.000520982	0.0130836	48	A0A0G2K2B3;M0R961;Q99PF5	Khsrp	Far upstream element-binding protein 2	A0A0G2K2B3_RAT;M0R961_RAT;FUBP2_RAT	12	-22.7452	0.772548
Pre-CIPN/Vehicle	A0A0G2K3I9;G3V9L3	A0A0G2K3I9	G3V9L3			0.00293584	0.0374435	40	A0A0G2K3I9;G3V9L3	Dusp3	Dual-specificity phosphatase 3	A0A0G2K3I9_RAT;G3V9L3_RAT	7	-22.3287	0.776713
Pre-CIPN/Vehicle	A1L1K8	A1L1K8				0.0034657	0.0450915	52	A1L1K8	Habp4	Intracellular hyaluronan-binding protein 4	HABP4_RAT	8	-22.1432	0.778568
Pre-CIPN/Vehicle	P19139	P19139				0.000462969	0.0122774	56	P19139	Csnk2a1	Casein kinase II subunit alpha	CSK21_RAT	10	-21.9683	0.780317
Pre-CIPN/Vehicle	P24090	P24090				0.000463679	0.0122774	68	P24090	Ahsg	Alpha-2-HS-glycoprotein	FETUA_RAT	9	-21.8212	0.781788
Pre-CIPN/Vehicle	A0A0G2JXC1;F1LRA1;Q62902	A0A0G2JXC1	F1LRA1	Q62902		0.00404171	0.0489612	28	A0A0G2JXC1;F1LRA1;Q62902	Lman1	Protein ERGIC-53	A0A0G2JXC1_RAT;F1LRA1_RAT;LMAN1_RAT	5	-20.7593	0.792407
Pre-CIPN/Vehicle	Q6AY21	Q6AY21				0.000384575	0.014272	72	Q6AY21	G3bp2	G3BP stress granule assembly factor 2	Q6AY21_RAT	9	-20.3993	0.796007
Pre-CIPN/Vehicle	D4A4D5;P02401	D4A4D5	P02401			0.000290513	0.00863035	52	D4A4D5;P02401	LOC498555;Rplp2	Similar to 60S acidic ribosomal protein P2;60S acidic ribosomal protein P2	D4A4D5_RAT;RLA2_RAT	8	-20.3202	0.796798
Pre-CIPN/Vehicle	F1M1B3	F1M1B3				0.00422502	0.0449439	44	F1M1B3	Washc5	WASH complex subunit 5	F1M1B3_RAT	11	-20.2589	0.797411
Pre-CIPN/Vehicle	Q68FQ0	Q68FQ0				0.00198292	0.0292751	159	Q68FQ0	Cct5	T-complex protein 1 subunit epsilon	TCPE_RAT	23	-19.8358	0.801642
Pre-CIPN/Vehicle	P23711	P23711				0.000989363	0.0233649	56	P23711	Hmox2	Heme oxygenase 2	HMOX2_RAT	10	-19.0259	0.809741
Pre-CIPN/Vehicle	F1M9Q8	F1M9Q8				0.000981464	0.0196323	56	F1M9Q8	Agps	Alkylglycerone-phosphate synthase	F1M9Q8_RAT	13	-18.9144	0.810856
Pre-CIPN/Vehicle	G3V8F8;P21263	G3V8F8	P21263			1.52931e-06	0.000206966	204	G3V8F8;P21263	Nes	Nestin	G3V8F8_RAT;NEST_RAT	41	-18.6857	0.813143
Pre-CIPN/Vehicle	B0BMW0;P61107	B0BMW0	P61107			0.000613855	0.0143784	64	B0BMW0;P61107	Rab14	RAB14, member RAS oncogene family;Ras-related protein Rab-14	B0BMW0_RAT;RAB14_RAT	10	-18.253	0.81747
Pre-CIPN/Vehicle	B5DF55	B5DF55				0.00142786	0.0238237	48	B5DF55	Stam	RCG55706	B5DF55_RAT	11	-18.2473	0.817527
Pre-CIPN/Vehicle	P16970	P16970				0.00287328	0.0370354	52	P16970	Abcd3	ATP-binding cassette sub-family D member 3	ABCD3_RAT	10	-18.1613	0.818387
Pre-CIPN/Vehicle	A0A0G2K022;I6L9G5	A0A0G2K022	I6L9G5			0.00092985	0.0190346	44	A0A0G2K022;I6L9G5	Rcn3	Reticulocalbin-3	A0A0G2K022_RAT;RCN3_RAT	9	-17.6388	0.823612
Pre-CIPN/Vehicle	G3V6L9	G3V6L9				0.00234835	0.032689	52	G3V6L9	Fkbp3	Peptidylprolyl isomerase	G3V6L9_RAT	8	-16.4698	0.835302
Pre-CIPN/Vehicle	A0A0H2UI38;D4A6G6;P17074	A0A0H2UI38	D4A6G6	P17074		0.00118457	0.0209102	52	A0A0H2UI38;D4A6G6;P17074	Rps19l2;LOC100362339;Rps19	Ribosomal protein S19-like2;Ribosomal protein S19-like;40S ribosomal protein S19	A0A0H2UI38_RAT;D4A6G6_RAT;RS19_RAT	8	-16.3402	0.836598
Pre-CIPN/Vehicle	F1LQC1;P07872	F1LQC1	P07872			0.00194813	0.0330053	80	F1LQC1;P07872	Acox1	Acyl-coenzyme A oxidase;Peroxisomal acyl-coenzyme A oxidase 1	F1LQC1_RAT;ACOX1_RAT	17	-16.254	0.83746
Pre-CIPN/Vehicle	P38983	P38983				0.00390453	0.0430952	68	P38983	Rpsa	40S ribosomal protein SA	RSSA_RAT	12	-15.9623	0.840377
Pre-CIPN/Vehicle	A1A5L1;P70645	A1A5L1	P70645			0.00326137	0.0393388	40	A1A5L1;P70645	Blmh	Bleomycin hydrolase	A1A5L1_RAT;BLMH_RAT	7	-15.8529	0.841471
Pre-CIPN/Vehicle	Q62703	Q62703				0.000503859	0.01292	64	Q62703	Rcn2	Reticulocalbin-2	RCN2_RAT	14	-15.3883	0.846117
Pre-CIPN/Vehicle	P37397	P37397				0.000848448	0.01862	64	P37397	Cnn3	Calponin-3	CNN3_RAT	10	-15.2736	0.847264
Pre-CIPN/Vehicle	A0A0G2K8H0;Q5M9G3	A0A0G2K8H0	Q5M9G3			0.00266719	0.0386596	56	A0A0G2K8H0;Q5M9G3	Caprin1	Caprin-1	A0A0G2K8H0_RAT;CAPR1_RAT	11	-15.1892	0.848108
Pre-CIPN/Vehicle	P60881	P60881				0.000319765	0.00938491	44	P60881	Snap25	Synaptosomal-associated protein 25	SNP25_RAT	8	-15.1742	0.848258
Pre-CIPN/Vehicle	B2RYD7	B2RYD7				0.00469008	0.04778	36	B2RYD7	Stt3b	RCG25591, isoform CRA_a	B2RYD7_RAT	9	-14.9568	0.850432
Pre-CIPN/Vehicle	A0A0G2K151;P02650	A0A0G2K151	P02650			0.0015406	0.0287215	64	A0A0G2K151;P02650	Apoe	Apolipoprotein E	A0A0G2K151_RAT;APOE_RAT	13	-14.9504	0.850496
Pre-CIPN/Vehicle	D3ZUB0	D3ZUB0				0.00445219	0.0465474	76	D3ZUB0	Rcn1	Reticulocalbin 1	D3ZUB0_RAT	14	-14.8308	0.851692
Pre-CIPN/Vehicle	Q6PCT9	Q6PCT9				0.00138073	0.0233573	68	Q6PCT9	Psmd6	Proteasome (Prosome, macropain) 26S subunit, non-ATPase, 6	Q6PCT9_RAT	12	-14.7033	0.852967
Pre-CIPN/Vehicle	Q1EG89;Q66H76	Q1EG89	Q66H76			3.11857e-05	0.00211023	52	Q1EG89;Q66H76	Pxn	Myocardial ischemic preconditioning associated protein 7;Paxillin	Q1EG89_RAT;PAXI_RAT	10	-14.5924	0.854076
Pre-CIPN/Vehicle	Q9QZR6	Q9QZR6				0.00221136	0.0359038	52	Q9QZR6	Septin9	Septin-9	SEPT9_RAT	12	-14.4893	0.855107
Pre-CIPN/Vehicle	Q6MG60	Q6MG60				0.00289528	0.0371205	68	Q6MG60	Ddah2	N(G),N(G)-dimethylarginine dimethylaminohydrolase 2	DDAH2_RAT	11	-13.9137	0.860863
Pre-CIPN/Vehicle	M0RC17	M0RC17				0.00299513	0.0377936	60	M0RC17	Chl1	Cell adhesion molecule L1-like	M0RC17_RAT	13	-13.8489	0.861511
Pre-CIPN/Vehicle	A0A0G2JWH5;B4F7C9	A0A0G2JWH5	B4F7C9			0.00379312	0.0466754	40	A0A0G2JWH5;B4F7C9	Stt3a	STT3 oligosaccharyltransferase complex catalytic subunit A	A0A0G2JWH5_RAT;B4F7C9_RAT	9	-13.8204	0.861796
Pre-CIPN/Vehicle	D4ABI7	D4ABI7				0.00013195	0.0055419	48	D4ABI7	Hacd3	Very-long-chain (3R)-3-hydroxyacyl-CoA dehydratase	D4ABI7_RAT	9	-13.733	0.86267
Pre-CIPN/Vehicle	D3ZJF9	D3ZJF9				0.00438765	0.0460703	52	D3ZJF9	Gla	Alpha-galactosidase	D3ZJF9_RAT	9	-13.1698	0.868302
Pre-CIPN/Vehicle	F1M614	F1M614				9.46276e-14	1.15256e-10	692	F1M614	Lama2	Laminin subunit alpha 2	F1M614_RAT	113	-13.1231	0.868769
Pre-CIPN/Vehicle	Q6MG49	Q6MG49				0.000777691	0.0173803	44	Q6MG49	Bag6	Large proline-rich protein BAG6	BAG6_RAT	11	-13.0658	0.869342
Pre-CIPN/Vehicle	D3ZD73	D3ZD73				0.00418321	0.0447445	76	D3ZD73	Ddx6	DEAD-box helicase 6	D3ZD73_RAT	13	-13.0286	0.869714
Pre-CIPN/Vehicle	Q6V7V2	Q6V7V2				0.00405437	0.0437011	68	Q6V7V2	Rtkn	Rhotekin	RTKN_RAT	13	-12.7107	0.872893
Pre-CIPN/Vehicle	B5DF91	B5DF91				0.00267872	0.0386596	48	B5DF91	Elavl1	ELAV-like protein 1	ELAV1_RAT	9	-12.3755	0.876245
Pre-CIPN/Vehicle	A0A0G2JSP8	A0A0G2JSP8				0.00273026	0.0361463	113	A0A0G2JSP8	Ckm	Creatine kinase M-type	A0A0G2JSP8_RAT	17	-12.2551	0.877449
Pre-CIPN/Vehicle	F1M8K0	F1M8K0				0.00118237	0.026523	100	F1M8K0	Dag1	Dystroglycan 1	F1M8K0_RAT	17	-12.0962	0.879038
Pre-CIPN/Vehicle	P11497	P11497				0.00120095	0.0210468	120	P11497	Acaca	Acetyl-CoA carboxylase 1	ACACA_RAT	28	-11.9749	0.880251
Pre-CIPN/Vehicle	F1LP82	F1LP82				0.00287344	0.0370354	72	F1LP82	Rab2a	Ras-related protein Rab-2A	F1LP82_RAT	13	-11.2113	0.887887
Pre-CIPN/Vehicle	D4A1Q2;F1LST4	D4A1Q2	F1LST4			0.000216412	0.00693657	104	D4A1Q2;F1LST4	Mapt	Microtubule-associated protein	D4A1Q2_RAT;F1LST4_RAT	19	-11.1697	0.888303
Pre-CIPN/Vehicle	B4F7B7;M0RD87	B4F7B7	M0RD87			0.0035294	0.0450915	72	B4F7B7;M0RD87	Dusp15	Dual specificity protein phosphatase 15;Dual specificity phosphatase-like 15 (Predicted), isoform CRA_b	DUS15_RAT;M0RD87_RAT	12	-11.1291	0.888709
Pre-CIPN/Vehicle	P00388	P00388				9.95603e-05	0.00449127	96	P00388	Por	NADPH--cytochrome P450 reductase	NCPR_RAT	19	-11.0633	0.889367
Pre-CIPN/Vehicle	B5DFL0	B5DFL0				0.000906773	0.0189306	56	B5DFL0	Snta1	Snta1 protein	B5DFL0_RAT	11	-10.8614	0.891386
Pre-CIPN/Vehicle	F1LRI5	F1LRI5				0.000773972	0.0173803	84	F1LRI5	Gcn1	GCN1 activator of EIF2AK4	F1LRI5_RAT	20	-10.774	0.89226
Pre-CIPN/Vehicle	O35244	O35244				0.00368128	0.0423	76	O35244	Prdx6	Peroxiredoxin-6	PRDX6_RAT	15	-10.66	0.8934
Pre-CIPN/Vehicle	F1LRJ9;Q8VIF7	F1LRJ9	Q8VIF7			0.000865404	0.0188225	72	F1LRJ9;Q8VIF7	Selenbp1	Methanethiol oxidase	F1LRJ9_RAT;SBP1_RAT	15	-10.4783	0.895217
Pre-CIPN/Vehicle	D3ZJ32	D3ZJ32				0.00301077	0.0421508	52	D3ZJ32	Esyt2	Extended synaptotagmin 2	D3ZJ32_RAT	12	-10.3504	0.896496
Pre-CIPN/Vehicle	F1M471	F1M471				0.0039165	0.0430952	44	F1M471	Epm2aip1	EPM2A-interacting protein 1	F1M471_RAT	10	-10.2135	0.897865
Pre-CIPN/Vehicle	O08700	O08700				0.000611421	0.0143784	52	O08700	Vps45	Vacuolar protein sorting-associated protein 45	VPS45_RAT	12	-10.1643	0.898357
Pre-CIPN/Vehicle	Q8R431	Q8R431				3.17334e-05	0.00256392	104	Q8R431	Mgll	Monoglyceride lipase	MGLL_RAT	15	-10.0112	0.899888
Pre-CIPN/Vehicle	Q5I0E7	Q5I0E7				0.00472917	0.0478019	32	Q5I0E7	Tmed9	Transmembrane emp24 domain-containing protein 9	TMED9_RAT	6	-9.63898	0.90361
Pre-CIPN/Vehicle	A0A0G2K7G7;G3V9Z6	A0A0G2K7G7	G3V9Z6			0.000545473	0.0134219	64	A0A0G2K7G7;G3V9Z6	Sept8	Septin-8;Septin 8 (Predicted)	A0A0G2K7G7_RAT;G3V9Z6_RAT	12	-9.58589	0.904141
Pre-CIPN/Vehicle	P51886	P51886				0.000225065	0.00712025	60	P51886	Lum	Lumican	LUM_RAT	9	-9.34958	0.906504
Pre-CIPN/Vehicle	D3ZAF6	D3ZAF6				0.00129956	0.0222938	16	D3ZAF6	Atp5mf	ATP synthase subunit f, mitochondrial	ATPK_RAT	3	-9.03191	0.909681
Pre-CIPN/Vehicle	Q32Q06	Q32Q06				0.00252178	0.034128	52	Q32Q06	Ap1m1	AP-1 complex subunit mu-1	AP1M1_RAT	11	-9.0131	0.909869
Pre-CIPN/Vehicle	D3ZL10	D3ZL10				1.31433e-06	0.000206966	284	D3ZL10	Col6a6	Collagen type VI alpha 6 chain	D3ZL10_RAT	51	-8.9607	0.910393
Pre-CIPN/Vehicle	A0A0G2K9L2	A0A0G2K9L2				0.00209448	0.0300126	88	A0A0G2K9L2	Tom1l2	Target of myb1-like 2 membrane-trafficking protein	A0A0G2K9L2_RAT	17	-8.79134	0.912087
Pre-CIPN/Vehicle	Q9JJ19	Q9JJ19				0.00300984	0.0377936	44	Q9JJ19	Slc9a3r1	Na(+)/H(+) exchange regulatory cofactor NHE-RF1	NHRF1_RAT	9	-8.44515	0.915549
Pre-CIPN/Vehicle	A0A0G2JVC8	A0A0G2JVC8				1.49581e-05	0.00134955	60	A0A0G2JVC8	Lss	Terpene cyclase/mutase family member	A0A0G2JVC8_RAT	14	-7.40707	0.925929
Pre-CIPN/Vehicle	O35112	O35112				0.00323124	0.0393388	100	O35112	Alcam	CD166 antigen	CD166_RAT	17	-7.24808	0.927519
Pre-CIPN/Vehicle	P62483	P62483				0.00114022	0.0204811	64	P62483	Kcnab2	Voltage-gated potassium channel subunit beta-2	KCAB2_RAT	12	-7.09143	0.929086
Pre-CIPN/Vehicle	P61354	P61354				0.00180862	0.0282637	56	P61354	Rpl27	60S ribosomal protein L27	RL27_RAT	7	-6.90786	0.930921
Pre-CIPN/Vehicle	P19804	P19804				0.00395431	0.043196	96	P19804	Nme2	Nucleoside diphosphate kinase B	NDKB_RAT	11	-6.57817	0.934218
Pre-CIPN/Vehicle	Q9EQP5	Q9EQP5				5.24168e-05	0.00308644	104	Q9EQP5	Prelp	Prolargin	PRELP_RAT	19	-6.55071	0.934493
Pre-CIPN/Vehicle	D3ZBP4	D3ZBP4				0.00165381	0.0297431	64	D3ZBP4	Mical1	[F-actin]-monooxygenase MICAL1	MICA1_RAT	15	-6.52164	0.934784
Pre-CIPN/Vehicle	Q80U96	Q80U96				0.000483947	0.0160209	76	Q80U96	Xpo1	Exportin-1	XPO1_RAT	17	-5.93341	0.940666
Pre-CIPN/Vehicle	D4A994	D4A994				0.000395263	0.0111961	96	D4A994	Emc1	ER membrane protein complex subunit 1	D4A994_RAT	21	-5.90669	0.940933
Pre-CIPN/Vehicle	Q641Y0	Q641Y0				0.00323863	0.0393388	84	Q641Y0	Ddost	Dolichyl-diphosphooligosaccharide--protein glycosyltransferase 48 kDa subunit	OST48_RAT	16	-5.80174	0.941983
Pre-CIPN/Vehicle	P14668	P14668				0.000102176	0.00452547	140	P14668	Anxa5	Annexin A5	ANXA5_RAT	20	-5.56383	0.944362
Pre-CIPN/Vehicle	Q4G079	Q4G079				0.00272232	0.0361463	76	Q4G079	Aimp1	Aminoacyl tRNA synthetase complex-interacting multifunctional protein 1	Q4G079_RAT	13	-5.5144	0.944856
Pre-CIPN/Vehicle	B0BMW2;O70351	B0BMW2	O70351			0.00434799	0.0458515	96	B0BMW2;O70351	Hsd17b10	3-hydroxyacyl-CoA dehydrogenase type-2	B0BMW2_RAT;HCD2_RAT	18	-5.43414	0.945659
Pre-CIPN/Vehicle	Q6MG55	Q6MG55				0.00350068	0.0410067	52	Q6MG55	Abhd16a	Phosphatidylserine lipase ABHD16A	ABHGA_RAT	13	-5.42815	0.945719
Pre-CIPN/Vehicle	F1M6E5	F1M6E5				3.88461e-05	0.00249024	164	F1M6E5	Nacad	NAC alpha domain-containing	F1M6E5_RAT	29	-5.09876	0.949012
Pre-CIPN/Vehicle	Q6IMZ3	Q6IMZ3				2.33861e-09	1.13937e-06	312	Q6IMZ3	Anxa6	Annexin	Q6IMZ3_RAT	47	-4.95114	0.950489
Pre-CIPN/Vehicle	P05370	P05370				0.00418791	0.0447445	112	P05370	G6pdx	Glucose-6-phosphate 1-dehydrogenase	G6PD_RAT	21	-4.83708	0.951629
Pre-CIPN/Vehicle	F1LNH3	F1LNH3				0.00223418	0.0314593	160	F1LNH3	Col6a2	Collagen type VI alpha 2 chain	F1LNH3_RAT	22	-4.79835	0.952017
Pre-CIPN/Vehicle	P10111	P10111				0.0027644	0.0396513	97	P10111	Ppia	Peptidyl-prolyl cis-trans isomerase A	PPIA_RAT	11	-4.78624	0.952138
Pre-CIPN/Vehicle	B5DEI0	B5DEI0				0.00299864	0.0421508	56	B5DEI0	Pcyox1l	Pcyox1l protein	B5DEI0_RAT	9	-4.7613	0.952387
Pre-CIPN/Vehicle	Q6AYK8	Q6AYK8				0.00334801	0.0444713	76	Q6AYK8	Eif3d	Eukaryotic translation initiation factor 3 subunit D	EIF3D_RAT	16	-4.65481	0.953452
Pre-CIPN/Vehicle	Q5XI22	Q5XI22				0.00171069	0.0275977	76	Q5XI22	Acat2	Acetyl-CoA acetyltransferase, cytosolic	THIC_RAT	11	-4.62737	0.953726
Pre-CIPN/Vehicle	D3ZUL3	D3ZUL3				9.51851e-05	0.00437492	228	D3ZUL3	Col6a1	Collagen type VI alpha 1 chain	D3ZUL3_RAT	34	-4.53088	0.954691
Pre-CIPN/Vehicle	O88267	O88267				0.00461979	0.0473978	60	O88267	Acot1	Acyl-coenzyme A thioesterase 1	ACOT1_RAT	12	-4.20583	0.957942
Pre-CIPN/Vehicle	Q2TA68	Q2TA68				0.00167134	0.0271425	132	Q2TA68	Opa1	Dynamin-like 120 kDa protein, mitochondrial	OPA1_RAT	24	-4.11949	0.958805
Pre-CIPN/Vehicle	P04256;Q5I0M7;Q6P6G9	P04256	Q5I0M7	Q6P6G9		0.00183715	0.0283246	84	P04256;Q5I0M7;Q6P6G9	Hnrnpa1	Heterogeneous nuclear ribonucleoprotein A1	ROA1_RAT;Q5I0M7_RAT;Q6P6G9_RAT	13	-3.97162	0.960284
Pre-CIPN/Vehicle	M0R735	M0R735				0.000158232	0.00611832	92	M0R735	Syncrip	Heterogeneous nuclear ribonucleoprotein Q	M0R735_RAT	19	-3.91231	0.960877
Pre-CIPN/Vehicle	A0A0G2K9A2;P85970	A0A0G2K9A2	P85970			0.00353301	0.041179	132	A0A0G2K9A2;P85970	Arpc2	Arp2/3 complex 34 kDa subunit;Actin-related protein 2/3 complex subunit 2	A0A0G2K9A2_RAT;ARPC2_RAT	20	-3.85307	0.961469
Pre-CIPN/Vehicle	F1LM84	F1LM84				9.59144e-09	3.73254e-06	280	F1LM84	Nid1	Nidogen-1	F1LM84_RAT	42	-3.74153	0.962585
Pre-CIPN/Vehicle	F1LTF8	F1LTF8				1.44213e-06	0.000206966	252	F1LTF8	Lama4	Laminin subunit alpha 4	F1LTF8_RAT	47	-3.69656	0.963034
Pre-CIPN/Vehicle	Q5VLR5	Q5VLR5				0.00156015	0.0287215	92	Q5VLR5	Erp44	BWK4	Q5VLR5_RAT	13	-3.61192	0.963881
Pre-CIPN/Vehicle	A0A0G2JUA5	A0A0G2JUA5				2.50252e-19	6.09615e-16	1253	A0A0G2JUA5	Ahnak	AHNAK nucleoprotein	A0A0G2JUA5_RAT	212	-3.44924	0.965508
Pre-CIPN/Vehicle	D3ZYS7	D3ZYS7				0.00350139	0.0410067	64	D3ZYS7	G3bp1	G3BP stress granule assembly factor 1	D3ZYS7_RAT	11	-3.28944	0.967106
Pre-CIPN/Vehicle	Q75Q39	Q75Q39				0.00136143	0.0277235	56	Q75Q39	Tomm70	Mitochondrial import receptor subunit TOM70	TOM70_RAT	12	-3.16925	0.968307
Pre-CIPN/Vehicle	Q5QD51	Q5QD51				0.00250807	0.034128	210	Q5QD51	Akap12	A-kinase anchor protein 12	AKA12_RAT	42	-2.87686	0.971231
Pre-CIPN/Vehicle	P11232	P11232				0.00334533	0.040144	40	P11232	Txn	Thioredoxin	THIO_RAT	6	-2.85406	0.971459
Pre-CIPN/Vehicle	A0A0G2K502;D3ZJH9	A0A0G2K502	D3ZJH9			0.00110061	0.0204811	100	A0A0G2K502;D3ZJH9	Me2	Malic enzyme	A0A0G2K502_RAT;D3ZJH9_RAT	22	-2.6597	0.973403
Pre-CIPN/Vehicle	F1LUD3	F1LUD3				0.000917001	0.0189306	240	F1LUD3	NaN	Uncharacterized protein	F1LUD3_RAT	49	-2.62269	0.973773		candidate excluded from comparisons with other datasets as no unique gene name is assigned
Pre-CIPN/Vehicle	Q9Z2L0	Q9Z2L0				6.34026e-05	0.00340067	100	Q9Z2L0	Vdac1	Voltage-dependent anion-selective channel protein 1	VDAC1_RAT	18	-2.58499	0.97415
Pre-CIPN/Vehicle	G3V936	G3V936				0.00324478	0.0441063	79	G3V936	Cs	Citrate synthase	G3V936_RAT	12	-2.48433	0.975157
Pre-CIPN/Vehicle	A0A0G2K9V6;Q5XHY5	A0A0G2K9V6	Q5XHY5			6.09904e-05	0.00387656	96	A0A0G2K9V6;Q5XHY5	Tars	Threonine--tRNA ligase, cytoplasmic;Threonine--tRNA ligase, cytoplasmic	A0A0G2K9V6_RAT;SYTC_RAT	20	-2.42111	0.975789
Pre-CIPN/Vehicle	M0R402	M0R402				0.00378856	0.0427923	48	M0R402	Tmx3	Thioredoxin-related transmembrane protein 3	M0R402_RAT	9	-2.41122	0.975888
Pre-CIPN/Vehicle	Q1JU68	Q1JU68				0.000152175	0.00726093	168	Q1JU68	Eif3a	Eukaryotic translation initiation factor 3 subunit A	EIF3A_RAT	32	-2.20232	0.977977
Pre-CIPN/Vehicle	P06907	P06907				0.000252981	0.00777924	132	P06907	Mpz	Myelin protein P0	MYP0_RAT	16	-2.1904	0.978096
Pre-CIPN/Vehicle	F7EUU4	F7EUU4				0.000182182	0.00652639	60	F7EUU4	Cops5	COP9 signalosome subunit 5	F7EUU4_RAT	13	-2.00406	0.979959
Pre-CIPN/Vehicle	A0A0G2JZ13;D3ZGE6;Q66HL2	A0A0G2JZ13	D3ZGE6	Q66HL2		0.00339474	0.0403394	56	A0A0G2JZ13;D3ZGE6;Q66HL2	Cttn	Src substrate cortactin;Cortactin, isoform CRA_c;Src substrate cortactin	A0A0G2JZ13_RAT;D3ZGE6_RAT;SRC8_RAT	11	-1.93282	0.980672
Pre-CIPN/Vehicle	Q6P6R2	Q6P6R2				0.00189238	0.0285465	88	Q6P6R2	Dld	Dihydrolipoyl dehydrogenase, mitochondrial	DLDH_RAT	14	-1.66688	0.983331
Pre-CIPN/Vehicle	Q07936	Q07936				0.00371818	0.0425234	188	Q07936	Anxa2	Annexin A2	ANXA2_RAT	25	-1.6016	0.983984
Pre-CIPN/Vehicle	Q00981	Q00981				0.00161605	0.0292894	119	Q00981	Uchl1	Ubiquitin carboxyl-terminal hydrolase isozyme L1	UCHL1_RAT	12	-1.3925	0.986075
Pre-CIPN/Vehicle	P21807	P21807				2.23408e-05	0.00175609	244	P21807	Prph	Peripherin	PERI_RAT	34	-1.35637	0.986436
Pre-CIPN/Vehicle	P07335	P07335				5.24299e-05	0.00308644	162	P07335	Ckb	Creatine kinase B-type	KCRB_RAT	17	-1.33449	0.986655
Pre-CIPN/Vehicle	Q5RJR9	Q5RJR9				0.00349632	0.0410067	143	Q5RJR9	Serpinh1	Serine (Or cysteine) proteinase inhibitor, clade H, member 1, isoform CRA_b	Q5RJR9_RAT	21	-1.31757	0.986824
Pre-CIPN/Vehicle	A0A0G2JZI2	A0A0G2JZI2				0.00283852	0.0370354	368	A0A0G2JZI2	Eprs	Glutamyl-prolyl-tRNA synthetase	A0A0G2JZI2_RAT	61	-1.24266	0.987573
Pre-CIPN/Vehicle	O35142	O35142				0.00325253	0.0393388	140	O35142	Copb2	Coatomer subunit beta'	COPB2_RAT	28	-1.16028	0.988397
Pre-CIPN/Vehicle	P13233	P13233				0.00281263	0.0370354	140	P13233	Cnp	2',3'-cyclic-nucleotide 3'-phosphodiesterase	CN37_RAT	20	-1.1223	0.988777
Pre-CIPN/Vehicle	D3ZZC1	D3ZZC1				0.00189841	0.0285465	72	D3ZZC1	Txndc5	RCG43947	D3ZZC1_RAT	13	-0.829286	0.991707
Pre-CIPN/Vehicle	G3V7J0;Q02253	G3V7J0	Q02253			0.000514498	0.0130554	112	G3V7J0;Q02253	Aldh6a1	Aldehyde dehydrogenase family 6, subfamily A1, isoform CRA_b;Methylmalonate-semialdehyde dehydrogenase [acylating], mitochondrial	G3V7J0_RAT;MMSA_RAT	23	-0.81738	0.991826
Pre-CIPN/Vehicle	G3V928	G3V928				0.000787894	0.0203563	116	G3V928	Lrp1	LDL receptor-related protein 1	G3V928_RAT	28	-0.71671	0.992833
Pre-CIPN/Vehicle	F1LNF0	F1LNF0				5.07751e-05	0.00308644	268	F1LNF0	Myh14	Myosin heavy chain 14	F1LNF0_RAT	54	-0.631072	0.993689
Pre-CIPN/Vehicle	A0A0G2JV12;F1LPD0	A0A0G2JV12	F1LPD0			0.00401617	0.043531	96	A0A0G2JV12;F1LPD0	Col15a1;LOC108348074	Collagen type XV alpha 1 chain;Collagen alpha-1(XV) chain-like	A0A0G2JV12_RAT;F1LPD0_RAT	18	-0.480344	0.995197
Pre-CIPN/Vehicle	Q6AYS7	Q6AYS7				0.00302941	0.0378443	80	Q6AYS7	Acy1a	Aminoacylase-1A	ACY1A_RAT	14	-0.470024	0.9953
Pre-CIPN/Vehicle	Q794E4	Q794E4				0.00105247	0.0203477	60	Q794E4	Hnrnpf	Heterogeneous nuclear ribonucleoprotein F	HNRPF_RAT	9	-0.423422	0.995766
Pre-CIPN/Vehicle	Q5PPJ6	Q5PPJ6				6.91215e-06	0.000765363	240	Q5PPJ6	Lars	Leucyl-tRNA synthetase	Q5PPJ6_RAT	45	-0.198232	0.998018
Pre-CIPN/Vehicle	P20070	P20070				2.5085e-05	0.00185173	116	P20070	Cyb5r3	NADH-cytochrome b5 reductase 3	NB5R3_RAT	16	-0.193339	0.998067
Pre-CIPN/Vehicle	P15650	P15650				0.000910051	0.0189306	80	P15650	Acadl	Long-chain specific acyl-CoA dehydrogenase, mitochondrial	ACADL_RAT	14	-0.191273	0.998087
Pre-CIPN/Vehicle	A0A0G2JSS8;Q9R063	A0A0G2JSS8	Q9R063			0.000337573	0.00967444	88	A0A0G2JSS8;Q9R063	Prdx5	Peroxiredoxin;Peroxiredoxin-5, mitochondrial	A0A0G2JSS8_RAT;PRDX5_RAT	13	-0.0866996	0.999133
Pre-CIPN/Vehicle	Q6P502	Q6P502				0.00141025	0.0236922	164	Q6P502	Cct3	T-complex protein 1 subunit gamma	TCPG_RAT	29	-0.0610143	0.99939
Pre-CIPN/Vehicle	Q6URK4	Q6URK4				0.00188106	0.0285465	112	Q6URK4	Hnrnpa3	Heterogeneous nuclear ribonucleoprotein A3	ROA3_RAT	18	0.0389343	1.00039
Pre-CIPN/Vehicle	G3V9G5	G3V9G5				0.000177873	0.00652639	285	G3V9G5	Synm	RCG24674, isoform CRA_b	G3V9G5_RAT	52	0.160327	1.0016
Pre-CIPN/Vehicle	A0A0G2K013;Q9QXQ0	A0A0G2K013	Q9QXQ0			0.000126499	0.00540615	220	A0A0G2K013;Q9QXQ0	Actn4	Alpha-actinin-4	A0A0G2K013_RAT;ACTN4_RAT	35	0.213355	1.00213
Pre-CIPN/Vehicle	A0A0G2JW88	A0A0G2JW88				0.00250702	0.034128	196	A0A0G2JW88	Map4	Microtubule-associated protein	A0A0G2JW88_RAT	36	0.224695	1.00225
Pre-CIPN/Vehicle	A0A0G2K5C6	A0A0G2K5C6				2.35393e-05	0.00179193	428	A0A0G2K5C6	Map1a	Microtubule-associated protein 1A	A0A0G2K5C6_RAT	78	0.333295	1.00333
Pre-CIPN/Vehicle	P11530	P11530				0.000972359	0.0196323	168	P11530	Dmd	Dystrophin	DMD_RAT	32	0.520316	1.0052
Pre-CIPN/Vehicle	A0A0G2JSZ5;Q63081	A0A0G2JSZ5	Q63081			0.00402072	0.043531	84	A0A0G2JSZ5;Q63081	Pdia6	Protein disulfide-isomerase A6	A0A0G2JSZ5_RAT;PDIA6_RAT	15	0.676607	1.00677
Pre-CIPN/Vehicle	G3V949	G3V949				0.00286487	0.0370354	124	G3V949	Clip2	CAP-Gly domain-containing linker protein 2	G3V949_RAT	25	0.993988	1.00994
Pre-CIPN/Vehicle	A0A0H2UHX3;P62703;X1WI37	A0A0H2UHX3	P62703	X1WI37		0.00195085	0.0289772	96	A0A0H2UHX3;P62703;X1WI37	Rps4x	40S ribosomal protein S4;40S ribosomal protein S4, X isoform;40S ribosomal protein S4	A0A0H2UHX3_RAT;RS4X_RAT;X1WI37_RAT	14	1.14567	1.01146
Pre-CIPN/Vehicle	D3Z941	D3Z941				0.00112097	0.0204811	200	D3Z941	Mars	Methionyl-tRNA synthetase	D3Z941_RAT	39	1.15872	1.01159
Pre-CIPN/Vehicle	D3ZAN3	D3ZAN3				1.32076e-06	0.000206966	168	D3ZAN3	Ganab	Alpha glucosidase 2 alpha neutral subunit (Predicted)	D3ZAN3_RAT	28	1.33743	1.01337
Pre-CIPN/Vehicle	Q68FS2	Q68FS2				0.00500858	0.0497576	96	Q68FS2	Cops4	COP9 signalosome complex subunit 4	CSN4_RAT	17	1.7947	1.01795
Pre-CIPN/Vehicle	D3ZWC6	D3ZWC6				0.000536112	0.0133262	120	D3ZWC6	Sntb1	Syntrophin, basic 1 (Predicted)	D3ZWC6_RAT	20	2.18759	1.02188
Pre-CIPN/Vehicle	G3V7C6	G3V7C6				0.000214236	0.00693657	224	G3V7C6	Tubb4b	Tubulin beta chain	G3V7C6_RAT	21	2.22096	1.02221
Pre-CIPN/Vehicle	A0A0G2JXT8;D4A8D5	A0A0G2JXT8	D4A8D5			1.20504e-06	0.000206966	516	A0A0G2JXT8;D4A8D5	Flnb	Filamin B	A0A0G2JXT8_RAT;D4A8D5_RAT	96	2.43006	1.0243
Pre-CIPN/Vehicle	A0A0G2JZG7	A0A0G2JZG7				0.00381196	0.0427923	144	A0A0G2JZG7	Sars	Serine--tRNA ligase, cytoplasmic	A0A0G2JZG7_RAT	27	2.43011	1.0243
Pre-CIPN/Vehicle	Q6P3V8	Q6P3V8				0.00210584	0.0346722	80	Q6P3V8	Eif4a1	Eukaryotic translation initiation factor 4A1	Q6P3V8_RAT	12	2.59498	1.02595
Pre-CIPN/Vehicle	Q60587	Q60587				0.000886859	0.0218625	100	Q60587	Hadhb	Trifunctional enzyme subunit beta, mitochondrial	ECHB_RAT	19	2.60133	1.02601
Pre-CIPN/Vehicle	A0A0G2K4V5;F1LSD3	A0A0G2K4V5	F1LSD3			0.000155831	0.00611832	336	A0A0G2K4V5;F1LSD3	Itgb4	Integrin beta	A0A0G2K4V5_RAT;F1LSD3_RAT	57	2.65466	1.02655
Pre-CIPN/Vehicle	Q4V8H8	Q4V8H8				0.00362731	0.0420767	160	Q4V8H8	Ehd2	EH domain-containing protein 2	EHD2_RAT	28	2.91933	1.02919
Pre-CIPN/Vehicle	G3V6T1	G3V6T1				2.27694e-06	0.000277331	180	G3V6T1	Copa	Coatomer subunit alpha	G3V6T1_RAT	37	2.95142	1.02951
Pre-CIPN/Vehicle	P62804	P62804				0.0027256	0.0361463	96	P62804	Hist1h4b	Histone H4	H4_RAT	12	2.98488	1.02985
Pre-CIPN/Vehicle	A0A0H2UHP1;P51647	A0A0H2UHP1	P51647			0.00174179	0.0279144	108	A0A0H2UHP1;P51647	Aldh1a1	Retinal dehydrogenase 1	A0A0H2UHP1_RAT;AL1A1_RAT	19	3.29731	1.03297
Pre-CIPN/Vehicle	C7E1V1;Q63269	C7E1V1	Q63269			7.1158e-05	0.0036881	232	C7E1V1;Q63269	Itpr3	Inositol 1,4,5-trisphosphate receptor type 3;Inositol 1,4,5-trisphosphate receptor type 3	C7E1V1_RAT;ITPR3_RAT	52	3.33637	1.03336
Pre-CIPN/Vehicle	F1MAA7	F1MAA7				1.20318e-06	0.000206966	372	F1MAA7	Lamc1	Laminin subunit gamma 1	F1MAA7_RAT	63	3.49841	1.03498
Pre-CIPN/Vehicle	M0R3N4	M0R3N4				0.00305841	0.0380117	128	M0R3N4	Vat1l	Vesicle amine transport 1-like	M0R3N4_RAT	20	3.7029	1.03703
Pre-CIPN/Vehicle	P63018	P63018				0.000148441	0.00611832	280	P63018	Hspa8	Heat shock cognate 71 kDa protein	HSP7C_RAT	33	3.73537	1.03735
Pre-CIPN/Vehicle	Q561S0	Q561S0				0.00128148	0.0271487	72	Q561S0	Ndufa10	NADH dehydrogenase [ubiquinone] 1 alpha subcomplex subunit 10, mitochondrial	NDUAA_RAT	16	3.98979	1.0399
Pre-CIPN/Vehicle	D3ZQN7	D3ZQN7				1.38288e-08	4.21087e-06	336	D3ZQN7	Lamb1	Laminin subunit beta 1	D3ZQN7_RAT	57	4.08248	1.04082
Pre-CIPN/Vehicle	P62198	P62198				0.00321639	0.0439761	64	P62198	Psmc5	26S proteasome regulatory subunit 8	PRS8_RAT	13	4.3199	1.0432
Pre-CIPN/Vehicle	A0A0G2K8W9;G3V6S0	A0A0G2K8W9	G3V6S0			2.96467e-07	7.22194e-05	841	A0A0G2K8W9;G3V6S0	Sptbn1	Spectrin beta chain	A0A0G2K8W9_RAT;G3V6S0_RAT	124	4.35322	1.04353
Pre-CIPN/Vehicle	A0A0G2JXA8;Q5XIW9;Q9Z2S9	A0A0G2JXA8	Q5XIW9	Q9Z2S9		0.00502478	0.0497576	80	A0A0G2JXA8;Q5XIW9;Q9Z2S9	Flot2	Flotillin 2, isoform CRA_d;Flot2 protein;Flotillin-2	A0A0G2JXA8_RAT;Q5XIW9_RAT;FLOT2_RAT	16	4.44307	1.04443
Pre-CIPN/Vehicle	P17425	P17425				0.000477446	0.0160209	120	P17425	Hmgcs1	Hydroxymethylglutaryl-CoA synthase, cytoplasmic	HMCS1_RAT	20	4.55134	1.04551
Pre-CIPN/Vehicle	P54921	P54921				0.00370019	0.0462623	104	P54921	Napa	Alpha-soluble NSF attachment protein	SNAA_RAT	19	4.72317	1.04723
Pre-CIPN/Vehicle	O35303	O35303				0.000488338	0.0126552	144	O35303	Dnm1l	Dynamin-1-like protein	DNM1L_RAT	27	4.7394	1.04739
Pre-CIPN/Vehicle	A0A0G2K5E7;G3V888	A0A0G2K5E7	G3V888			7.68334e-06	0.0007835	272	A0A0G2K5E7;G3V888	Acly	ATP-citrate synthase	A0A0G2K5E7_RAT;G3V888_RAT	44	4.78095	1.04781
Pre-CIPN/Vehicle	Q9Z1X1	Q9Z1X1				0.00089141	0.0189306	196	Q9Z1X1	Esyt1	Extended synaptotagmin-1	ESYT1_RAT	36	4.82876	1.04829
Pre-CIPN/Vehicle	G3V8T4	G3V8T4				0.00180999	0.0282637	100	G3V8T4	Ddb1	DNA damage-binding protein 1	G3V8T4_RAT	23	5.16461	1.05165
Pre-CIPN/Vehicle	F1MAN8	F1MAN8				0.00182999	0.0283246	208	F1MAN8	Lama5	Laminin subunit alpha 5	F1MAN8_RAT	45	5.36297	1.05363
Pre-CIPN/Vehicle	P62909	P62909				0.00154627	0.0254508	96	P62909	Rps3	40S ribosomal protein S3	RS3_RAT	16	5.6258	1.05626
Pre-CIPN/Vehicle	Q5U2X8	Q5U2X8				0.00208462	0.0345662	76	Q5U2X8	Acot9	Acyl-CoA thioesterase 9	Q5U2X8_RAT	17	5.84789	1.05848
Pre-CIPN/Vehicle	D3ZCF8;D3ZXD2	D3ZCF8	D3ZXD2			0.00209097	0.0300126	212	D3ZCF8;D3ZXD2	Abca8a	ATP-binding cassette, subfamily A (ABC1), member 8a;ATP-binding cassette, subfamily A (ABC1), member 8a	D3ZCF8_RAT;D3ZXD2_RAT	37	5.92211	1.05922
Pre-CIPN/Vehicle	D3ZD97	D3ZD97				0.00300062	0.0377936	76	D3ZD97	Dhx15	DEAH (Asp-Glu-Ala-His) box polypeptide 15 (Predicted), isoform CRA_b	D3ZD97_RAT	17	6.06041	1.0606
Pre-CIPN/Vehicle	Q4G061	Q4G061				0.00229136	0.0364435	125	Q4G061	Eif3b	Eukaryotic translation initiation factor 3 subunit B	EIF3B_RAT	24	6.21563	1.06216
Pre-CIPN/Vehicle	Q6P3V9	Q6P3V9				0.00375573	0.0427522	132	Q6P3V9	Rpl4	60S ribosomal protein L4	Q6P3V9_RAT	21	6.41585	1.06416
Pre-CIPN/Vehicle	Q5BJT9	Q5BJT9				0.00199627	0.0292946	92	Q5BJT9	Ckmt1	Creatine kinase U-type, mitochondrial	Q5BJT9_RAT	14	6.46376	1.06464
Pre-CIPN/Vehicle	Q5XI78	Q5XI78				2.23476e-05	0.00175609	200	Q5XI78	Ogdh	2-oxoglutarate dehydrogenase, mitochondrial	ODO1_RAT	39	6.49416	1.06494
Pre-CIPN/Vehicle	Q07009	Q07009				0.000212564	0.00693657	164	Q07009	Capn2	Calpain-2 catalytic subunit	CAN2_RAT	30	6.51131	1.06511
Pre-CIPN/Vehicle	Q6LED0	Q6LED0				0.00114344	0.0204811	28	Q6LED0	NaN	Histone H3.1	H31_RAT	4	6.53805	1.06538		candidate excluded from comparisons with other datasets as no unique gene name is assigned
Pre-CIPN/Vehicle	Q6UPE0	Q6UPE0				0.000120017	0.00522074	80	Q6UPE0	Chdh	Choline dehydrogenase, mitochondrial	CHDH_RAT	14	6.5381	1.06538
Pre-CIPN/Vehicle	P10860	P10860				0.000334022	0.00967444	180	P10860	Glud1	Glutamate dehydrogenase 1, mitochondrial	DHE3_RAT	27	6.63234	1.06632
Pre-CIPN/Vehicle	P15999	P15999				0.00470739	0.04778	212	P15999	Atp5f1a	ATP synthase subunit alpha, mitochondrial	ATPA_RAT	30	7.11	1.0711
Pre-CIPN/Vehicle	Q920L2	Q920L2				0.00491636	0.0494886	112	Q920L2	Sdha	Succinate dehydrogenase [ubiquinone] flavoprotein subunit, mitochondrial	SDHA_RAT	20	7.21533	1.07215
Pre-CIPN/Vehicle	P18422	P18422				0.00326209	0.0393388	48	P18422	Psma3	Proteasome subunit alpha type-3	PSA3_RAT	7	7.31557	1.07316
Pre-CIPN/Vehicle	P50137	P50137				2.9017e-05	0.00207718	208	P50137	Tkt	Transketolase	TKT_RAT	30	7.64281	1.07643
Pre-CIPN/Vehicle	G3V6D3;P10719	G3V6D3	P10719			0.00209139	0.0300126	244	G3V6D3;P10719	Atp5f1b	ATP synthase subunit beta;ATP synthase subunit beta, mitochondrial	G3V6D3_RAT;ATPB_RAT	28	7.76059	1.07761
Pre-CIPN/Vehicle	A0A0G2KBC7;Q52KS1	A0A0G2KBC7	Q52KS1			1.49794e-06	0.000206966	172	A0A0G2KBC7;Q52KS1	Pfkm	ATP-dependent 6-phosphofructokinase	A0A0G2KBC7_RAT;Q52KS1_RAT	29	7.78105	1.07781
Pre-CIPN/Vehicle	Q05096	Q05096				0.000195934	0.00672247	108	Q05096	Myo1b	Unconventional myosin-Ib	MYO1B_RAT	24	7.78474	1.07785
Pre-CIPN/Vehicle	A0A0G2K757;P25235	A0A0G2K757	P25235			0.00462888	0.0473978	112	A0A0G2K757;P25235	Rpn2	Dolichyl-diphosphooligosaccharide--protein glycosyltransferase subunit 2	A0A0G2K757_RAT;RPN2_RAT	22	8.11062	1.08111
Pre-CIPN/Vehicle	P11980	P11980				0.000983228	0.0196323	228	P11980	Pkm	Pyruvate kinase PKM	KPYM_RAT	33	8.21706	1.08217
Pre-CIPN/Vehicle	Q5RKI1	Q5RKI1				0.00137015	0.0233404	155	Q5RKI1	Eif4a2	Eukaryotic initiation factor 4A-II	IF4A2_RAT	23	8.36342	1.08363
Pre-CIPN/Vehicle	P06685	P06685				0.0012337	0.0267073	152	P06685	Atp1a1	Sodium/potassium-transporting ATPase subunit alpha-1	AT1A1_RAT	23	8.4436	1.08444
Pre-CIPN/Vehicle	Q4QQV4	Q4QQV4				0.00426905	0.0452148	84	Q4QQV4	Hars	Dead end homolog 1 (Zebrafish)	Q4QQV4_RAT	19	8.55599	1.08556
Pre-CIPN/Vehicle	P97852;Q6IN39	P97852	Q6IN39			0.00327971	0.0443235	80	P97852;Q6IN39	Hsd17b4	Peroxisomal multifunctional enzyme type 2;Hsd17b4 protein	DHB4_RAT;Q6IN39_RAT	18	8.59252	1.08593
Pre-CIPN/Vehicle	P04182	P04182				4.96396e-06	0.000575819	128	P04182	Oat	Ornithine aminotransferase, mitochondrial	OAT_RAT	20	8.59325	1.08593
Pre-CIPN/Vehicle	A0A0G2KAJ7	A0A0G2KAJ7				0.0045357	0.0470169	280	A0A0G2KAJ7	Col12a1	Collagen alpha-1(XII) chain	A0A0G2KAJ7_RAT	60	8.99612	1.08996
Pre-CIPN/Vehicle	D4A133	D4A133				0.00338111	0.0403394	164	D4A133	Atp6v1a	ATPase H+-transporting V1 subunit A	D4A133_RAT	30	9.33977	1.0934
Pre-CIPN/Vehicle	P34058	P34058				1.8594e-05	0.00161768	171	P34058	Hsp90ab1	Heat shock protein HSP 90-beta	HS90B_RAT	25	9.38633	1.09386
Pre-CIPN/Vehicle	P16086	P16086				1.80668e-12	1.10027e-09	1074	P16086	Sptan1	Spectrin alpha chain, non-erythrocytic 1	SPTN1_RAT	167	9.66652	1.09667
Pre-CIPN/Vehicle	P62630	P62630				0.000255476	0.00777924	143	P62630	Eef1a1	Elongation factor 1-alpha 1	EF1A1_RAT	19	10.3109	1.10311
Pre-CIPN/Vehicle	Q641Y2	Q641Y2				8.93684e-05	0.00435403	120	Q641Y2	Ndufs2	NADH dehydrogenase [ubiquinone] iron-sulfur protein 2, mitochondrial	NDUS2_RAT	19	10.3612	1.10361
Pre-CIPN/Vehicle	G3V8C3;P31000	G3V8C3	P31000			0.000168684	0.00642052	336	G3V8C3;P31000	Vim	Vimentin	G3V8C3_RAT;VIME_RAT	39	10.4968	1.10497
Pre-CIPN/Vehicle	Q6S3A3	Q6S3A3				7.8965e-05	0.00400747	1089	Q6S3A3	Plec	Plectin	Q6S3A3_RAT	200	10.6388	1.10639
Pre-CIPN/Vehicle	P47860	P47860				0.00066696	0.0153275	212	P47860	Pfkp	ATP-dependent 6-phosphofructokinase, platelet type	PFKAP_RAT	33	10.6999	1.107
Pre-CIPN/Vehicle	Q924N5	Q924N5				0.00227689	0.0318764	140	Q924N5	Acsbg1	Long-chain-fatty-acid--CoA ligase ACSBG1	ACBG1_RAT	27	10.8031	1.10803
Pre-CIPN/Vehicle	F1LTJ5	F1LTJ5				4.59748e-07	0.000101813	408	F1LTJ5	NaN	Uncharacterized protein	F1LTJ5_RAT	66	11.0097	1.1101		candidate excluded from comparisons with other datasets as no unique gene name is assigned
Pre-CIPN/Vehicle	F1LNJ2;M3ZCQ2	F1LNJ2	M3ZCQ2			0.00335083	0.0444713	100	F1LNJ2;M3ZCQ2	Snrnp200	U5 small nuclear ribonucleoprotein 200 kDa helicase	U520_RAT;M3ZCQ2_RAT	23	11.5966	1.11597
Pre-CIPN/Vehicle	P47942	P47942				6.1762e-05	0.00340067	261	P47942	Dpysl2	Dihydropyrimidinase-related protein 2	DPYL2_RAT	31	11.6012	1.11601
Pre-CIPN/Vehicle	P85973	P85973				0.0010327	0.0202876	96	P85973	Pnp	Purine nucleoside phosphorylase	PNPH_RAT	16	11.6031	1.11603
Pre-CIPN/Vehicle	Q63425	Q63425				6.02338e-05	0.00340067	592	Q63425	Prx	Periaxin	PRAX_RAT	73	11.708	1.11708
Pre-CIPN/Vehicle	D4A8U7	D4A8U7				0.0021656	0.0308503	240	D4A8U7	Dctn1	Dynactin 1, isoform CRA_a	D4A8U7_RAT	41	11.901	1.11901
Pre-CIPN/Vehicle	F1LQN3;Q9JK11	F1LQN3	Q9JK11			0.00361066	0.0458789	224	F1LQN3;Q9JK11	Rtn4	Reticulon;Reticulon-4	F1LQN3_RAT;RTN4_RAT	38	12.0375	1.12037
Pre-CIPN/Vehicle	M0R9X8	M0R9X8				5.21513e-13	4.23468e-10	1208	M0R9X8	Dync1h1	Cytoplasmic dynein 1 heavy chain 1	M0R9X8_RAT	217	12.3129	1.12313
Pre-CIPN/Vehicle	A0A0A0MY09;Q66HD0	A0A0A0MY09	Q66HD0			0.000204247	0.00691037	244	A0A0A0MY09;Q66HD0	Hsp90b1	Endoplasmin	A0A0A0MY09_RAT;ENPL_RAT	41	12.5574	1.12557
Pre-CIPN/Vehicle	F1M779;P11442	F1M779	P11442			2.98446e-05	0.00207718	512	F1M779;P11442	Cltc	Clathrin heavy chain;Clathrin heavy chain 1	F1M779_RAT;CLH1_RAT	82	12.8567	1.12857
Pre-CIPN/Vehicle	D4A8H8	D4A8H8				0.00180573	0.0282637	84	D4A8H8	Cyfip1	Cytoplasmic FMR1-interacting protein	D4A8H8_RAT	20	12.9318	1.12932
Pre-CIPN/Vehicle	Q6P9V9	Q6P9V9				0.000179907	0.00652639	245	Q6P9V9	Tuba1b	Tubulin alpha-1B chain	TBA1B_RAT	32	12.974	1.12974
Pre-CIPN/Vehicle	D3ZA84	D3ZA84				0.00241594	0.037407	280	D3ZA84	Tln2	Talin 2	D3ZA84_RAT	61	13.116	1.13116
Pre-CIPN/Vehicle	P00507	P00507				0.00244057	0.0337797	172	P00507	Got2	Aspartate aminotransferase, mitochondrial	AATM_RAT	25	13.3915	1.13392
Pre-CIPN/Vehicle	F1LS86	F1LS86				0.000421774	0.0115443	232	F1LS86	Iars	Isoleucine-tRNA synthetase (Predicted)	F1LS86_RAT	43	14.1168	1.14117
Pre-CIPN/Vehicle	P50399	P50399				0.000416968	0.0115443	199	P50399	Gdi2	Rab GDP dissociation inhibitor beta	GDIB_RAT	34	14.3677	1.14368
Pre-CIPN/Vehicle	P82995	P82995				0.00105084	0.0203477	282	P82995	Hsp90aa1	Heat shock protein HSP 90-alpha	HS90A_RAT	39	14.6073	1.14607
Pre-CIPN/Vehicle	P85845	P85845				0.00205829	0.0300126	96	P85845	Fscn1	Fascin	FSCN1_RAT	17	14.699	1.14699
Pre-CIPN/Vehicle	M0RCA6	M0RCA6				0.00501052	0.0497576	152	M0RCA6	Avil	Advillin	M0RCA6_RAT	28	15.0658	1.15066
Pre-CIPN/Vehicle	Q64560	Q64560				0.00463082	0.0473978	228	Q64560	Tpp2	Tripeptidyl-peptidase 2	TPP2_RAT	41	15.4066	1.15407
Pre-CIPN/Vehicle	Q6JE36	Q6JE36				0.000481232	0.0126052	126	Q6JE36	Ndrg1	Protein NDRG1	NDRG1_RAT	13	15.5539	1.15554
Pre-CIPN/Vehicle	P46462	P46462				1.08326e-05	0.00105553	320	P46462	Vcp	Transitional endoplasmic reticulum ATPase	TERA_RAT	49	15.5835	1.15583
Pre-CIPN/Vehicle	P23514	P23514				0.00107415	0.0204811	144	P23514	Copb1	Coatomer subunit beta	COPB_RAT	27	15.635	1.15635
Pre-CIPN/Vehicle	Q5XHZ0	Q5XHZ0				0.000418791	0.0115443	96	Q5XHZ0	Trap1	Heat shock protein 75 kDa, mitochondrial	TRAP1_RAT	21	15.7731	1.15773
Pre-CIPN/Vehicle	P41542	P41542				0.00113917	0.0204811	144	P41542	Uso1	General vesicular transport factor p115	USO1_RAT	26	15.8512	1.15851
Pre-CIPN/Vehicle	Q68FU3	Q68FU3				0.00123486	0.0214866	68	Q68FU3	Etfb	Electron transfer flavoprotein subunit beta	ETFB_RAT	13	15.9311	1.15931
Pre-CIPN/Vehicle	F1LN42	F1LN42				0.000599068	0.0143071	180	F1LN42	Tns1	Tensin 1	F1LN42_RAT	37	16.7212	1.16721
Pre-CIPN/Vehicle	P14046	P14046				1.47623e-05	0.00134955	425	P14046	A1i3	Alpha-1-inhibitor 3	A1I3_RAT	55	16.8552	1.16855
Pre-CIPN/Vehicle	P41562	P41562				0.000906959	0.0189306	88	P41562	Idh1	Isocitrate dehydrogenase [NADP] cytoplasmic	IDHC_RAT	17	16.9845	1.16985
Pre-CIPN/Vehicle	P56571	P56571				0.00125504	0.0216828	56	P56571	NaN	ES1 protein homolog, mitochondrial	ES1_RAT	7	17.335	1.17335		candidate excluded from comparisons with other datasets as no unique gene name is assigned
Pre-CIPN/Vehicle	P12785	P12785				1.74558e-08	4.72471e-06	546	P12785	Fasn	Fatty acid synthase	FAS_RAT	95	17.4689	1.17469
Pre-CIPN/Vehicle	Q6P7A7	Q6P7A7				0.000674319	0.0193757	140	Q6P7A7	Rpn1	Dolichyl-diphosphooligosaccharide--protein glycosyltransferase subunit 1	Q6P7A7_RAT	25	17.793	1.17793
Pre-CIPN/Vehicle	F1LNK0	F1LNK0				3.22417e-05	0.00256392	228	F1LNK0	Map2	Microtubule-associated protein	F1LNK0_RAT	45	18.231	1.18231
Pre-CIPN/Vehicle	Q9ER34	Q9ER34				0.0038761	0.0430952	225	Q9ER34	Aco2	Aconitate hydratase, mitochondrial	ACON_RAT	35	18.3021	1.18302
Pre-CIPN/Vehicle	P18418	P18418				0.000896011	0.0189306	139	P18418	Calr	Calreticulin	CALR_RAT	19	18.4019	1.18402
Pre-CIPN/Vehicle	D4A4Z9	D4A4Z9				3.42887e-05	0.0022575	286	D4A4Z9	Ktn1	Kinectin 1	D4A4Z9_RAT	48	18.6404	1.1864
Pre-CIPN/Vehicle	P40329	P40329				9.47193e-05	0.00437492	152	P40329	Rars	Arginine--tRNA ligase, cytoplasmic	SYRC_RAT	30	18.6448	1.18645
Pre-CIPN/Vehicle	M0R6K0;P15800	M0R6K0	P15800			5.32144e-05	0.00308644	419	M0R6K0;P15800	Lamb2	Laminin subunit beta-2	M0R6K0_RAT;LAMB2_RAT	62	19.8372	1.19837
Pre-CIPN/Vehicle	P62815	P62815				0.000995756	0.0197208	120	P62815	Atp6v1b2	V-type proton ATPase subunit B, brain isoform	VATB2_RAT	22	20.5949	1.20595
Pre-CIPN/Vehicle	P15205	P15205				0.000215393	0.00915617	484	P15205	Map1b	Microtubule-associated protein 1B	MAP1B_RAT	86	21.2619	1.21262
Pre-CIPN/Vehicle	G3V6P7	G3V6P7				0.0010802	0.0204811	550	G3V6P7	Myh9	Myosin heavy chain 9-like 1	G3V6P7_RAT	84	22.1295	1.22129
Pre-CIPN/Vehicle	A0A0G2K1Q9;Q9JMB3	A0A0G2K1Q9	Q9JMB3			0.00161104	0.0263388	248	A0A0G2K1Q9;Q9JMB3	Epb41l3	Erythrocyte membrane protein band 4.1-like 3	A0A0G2K1Q9_RAT;Q9JMB3_RAT	39	22.1413	1.22141
Pre-CIPN/Vehicle	M0RBF1;M0RBJ7	M0RBF1	M0RBJ7			0.000762137	0.0173511	465	M0RBF1;M0RBJ7	C3	Complement C3	M0RBF1_RAT;M0RBJ7_RAT	76	22.906	1.22906
Pre-CIPN/Vehicle	Q5U300	Q5U300				0.00116825	0.0207728	244	Q5U300	Uba1	Ubiquitin-like modifier-activating enzyme 1	UBA1_RAT	40	23.168	1.23168
Pre-CIPN/Vehicle	Q9EPA0	Q9EPA0				0.00379286	0.0466754	96	Q9EPA0	Drp2	Dystrophin-related protein 2	DRP2_RAT	18	27.7484	1.27748
Pre-CIPN/Vehicle	G3V6Y6	G3V6Y6				0.000553564	0.0134848	236	G3V6Y6	Pygb	Alpha-1,4 glucan phosphorylase	G3V6Y6_RAT	37	27.773	1.27773
Pre-CIPN/Vehicle	P29975	P29975				0.000836464	0.0185239	12	P29975	Aqp1	Aquaporin-1	AQP1_RAT	2	35.1854	1.35185
Pre-CIPN/Vehicle	A0A0G2JVH4	A0A0G2JVH4				0.00111247	0.0204811	160	A0A0G2JVH4	Immt	MICOS complex subunit MIC60	A0A0G2JVH4_RAT	25	37.1461	1.37146
Pre-CIPN/Vehicle	Q66H98	Q66H98				0.00398505	0.0485262	52	Q66H98	Cavin2	Caveolae-associated protein 2	CAVN2_RAT	9	38.371	1.38371
Pre-CIPN/Vehicle	D3ZFY8	D3ZFY8				0.00310877	0.0384414	8	D3ZFY8	LOC100912618	Ubiquitin-conjugating enzyme E2 V1	D3ZFY8_RAT	2	47.1581	1.47158
Pre-CIPN/Vehicle	A0A0G2JT93	A0A0G2JT93				0.00222425	0.0314593	151	A0A0G2JT93	Ctnnb1	Catenin (Cadherin associated protein), beta 1, isoform CRA_a	A0A0G2JT93_RAT	27	51.3885	1.51388
Pre-CIPN/Vehicle	B5DF57	B5DF57				0.000273962	0.00823915	64	B5DF57	Epb42	Erythrocyte membrane protein band 4.2	B5DF57_RAT	14	100.372	2.00372
Pre-CIPN/Vehicle	P14480	P14480				0.00019499	0.00672247	244	P14480	Fgb	Fibrinogen beta chain	FIBB_RAT	32	102.968	2.02968
Pre-CIPN/Vehicle	Q7TQ70	Q7TQ70				0.00191962	0.0286884	240	Q7TQ70	Fga	Ac1873	Q7TQ70_RAT	31	109.719	2.09719
Pre-CIPN/Vehicle	D3ZAC0	D3ZAC0				0.000186817	0.00659544	64	D3ZAC0	Itga2b	Integrin subunit alpha 2b	D3ZAC0_RAT	12	113.844	2.13844
Pre-CIPN/Vehicle	F1LRV9	F1LRV9				0.00335903	0.0444713	397	F1LRV9	Myh1	Myosin-4	F1LRV9_RAT	69	119.472	2.19472
Pre-CIPN/Vehicle	M0R979	M0R979				0.000229324	0.00957328	56	M0R979	Thbs1	Thrombospondin 1	M0R979_RAT	12	123.716	2.23716

## Sheet: Peak-CIPN_final hit list
Candidate list of all protein groups that are dysregulated at peak-CIPN
Comparison (group1/group2)	Group	ProteinGroups		AVG Log2 Ratio	Absolute AVG Log2 Ratio	Pvalue	Qvalue	# of Ratios	UniProtIds	Genes	ProteinDescriptions	ProteinNames	# Unique Total Peptides	% Change	Ratio
Peak-CIPN/Vehicle	P04466	P04466		2.37892	2.37892	0.000125975	0.0407152	56	P04466	Mylpf	Myosin regulatory light chain 2, skeletal muscle isoform	MLRS_RAT	10	420.148	5.20148
Peak-CIPN/Vehicle	A0A0G2K484;F1LMU0	A0A0G2K484	F1LMU0	2.22035	2.22035	2.10599e-23	3.40327e-20	216	A0A0G2K484;F1LMU0	Myh1;Myh4	Myosin-4	A0A0G2K484_RAT;F1LMU0_RAT	36	366.008	4.66008
Peak-CIPN/Vehicle	F1LRV9	F1LRV9		0.739776	0.739776	5.56612e-49	1.79897e-45	428	F1LRV9	Myh1	Myosin-4	F1LRV9_RAT	75	66.9917	1.66992
Peak-CIPN/Vehicle	B2GVB9	B2GVB9		0.50102	0.50102	7.86268e-05	0.0203858	28	B2GVB9	Fermt3	Fermitin family member 3	B2GVB9_RAT	7	41.5214	1.41521
Peak-CIPN/Vehicle	Q8R4I6	Q8R4I6		0.499126	0.499126	4.16075e-09	4.48251e-06	68	Q8R4I6	Actn3	Actinin alpha 3	Q8R4I6_RAT	15	41.3357	1.41336
Peak-CIPN/Vehicle	Q64578	Q64578		0.357088	0.357088	1.96099e-05	0.0126759	96	Q64578	Atp2a1	Sarcoplasmic/endoplasmic reticulum calcium ATPase 1	AT2A1_RAT	18	28.0838	1.28084
Peak-CIPN/Vehicle	Q6Q0N1	Q6Q0N1		0.0863812	0.0863812	6.7553e-05	0.0192661	84	Q6Q0N1	Cndp2	Cytosolic non-specific dipeptidase	CNDP2_RAT	18	6.17037	1.0617
Peak-CIPN/Vehicle	E9PTU4	E9PTU4		0.0330701	0.0330701	5.96959e-05	0.0270063	436	E9PTU4	Myh11	Myosin-11	E9PTU4_RAT	76	2.31872	1.02319
Peak-CIPN/Vehicle	P16086	P16086		-0.0808083	0.0808083	3.25145e-08	3.09104e-05	964	P16086	Sptan1	Spectrin alpha chain, non-erythrocytic 1	SPTN1_RAT	156	-5.44722	0.945528
Peak-CIPN/Vehicle	A0A140UHX6	A0A140UHX6		-0.106576	0.106576	0.000166372	0.048883	488	A0A140UHX6	Sptb	Spectrin beta chain	A0A140UHX6_RAT	87	-7.12104	0.92879
Peak-CIPN/Vehicle	A0A0G2K4V5;F1LSD3	A0A0G2K4V5	F1LSD3	-0.110068	0.110068	6.32992e-05	0.0270063	340	A0A0G2K4V5;F1LSD3	Itgb4	Integrin beta	A0A0G2K4V5_RAT;F1LSD3_RAT	57	-7.34556	0.926544
Peak-CIPN/Vehicle	P12839	P12839		-0.121539	0.121539	7.9448e-05	0.0285307	288	P12839	Nefm	Neurofilament medium polypeptide	NFM_RAT	36	-8.07933	0.919207
Peak-CIPN/Vehicle	D4A678	D4A678		-0.156386	0.156386	9.24045e-06	0.00746628	568	D4A678	Spta1	Spectrin, alpha, erythrocytic 1	D4A678_RAT	101	-10.273	0.89727
Peak-CIPN/Vehicle	D3ZDT1	D3ZDT1		-0.204991	0.204991	0.000182232	0.0490811	248	D3ZDT1	Epb41l2	Erythrocyte membrane protein band 4.1-like 2	D3ZDT1_RAT	40	-13.2456	0.867544
Peak-CIPN/Vehicle	A0A0G2JUA5	A0A0G2JUA5		-0.363455	0.363455	9.1805e-08	6.5457e-05	1031	A0A0G2JUA5	Ahnak	AHNAK nucleoprotein	A0A0G2JUA5_RAT	188	-22.2699	0.777301
