# Supplementary material for: Proteome and Network Analysis Provides Novel Insights Into Developing and Established Chemotherapy-Induced Peripheral Neuropathy
Source: Front Pharmacol. 2022 Feb 18;13:818690. doi: 10.3389/fphar.2022.818690 (PMC8895144; doi:10.3389/fphar.2022.818690)
Supplement: Supplementary file 7 [file Table1.XLSX]

## Sheet: pre CIPN_dataset
Complete dataset of proteomics results at pre-CIPN. Only proteins identified with 2 or more unique peptides (column M) are considered.
Comparison (group1/group2)	Group	ProteinGroups	AVG Log2 Ratio	Absolute AVG Log2 Ratio	Pvalue	Qvalue	# of Ratios	UniProtIds	Genes	ProteinDescriptions	ProteinNames	# Unique Total Peptides	% Change	Ratio
PD7 / VD7	F1LNK0	F1LNK0	0.241608	0.241608	3.22417e-05	0.00256392	228	F1LNK0	Map2	Microtubule-associated protein	F1LNK0_RAT	45	18.231	1.18231
PD7 / VD7	Q8R431	Q8R431	-0.152183	0.152183	3.17334e-05	0.00256392	104	Q8R431	Mgll	Monoglyceride lipase	MGLL_RAT	15	-10.0112	0.899888
PD7 / VD7	Q1JU68	Q1JU68	-0.0321278	0.0321278	0.000152175	0.00726093	168	Q1JU68	Eif3a	Eukaryotic translation initiation factor 3 subunit A	EIF3A_RAT	32	-2.20232	0.977977
PD7 / VD7	P15205	P15205	0.278126	0.278126	0.000215393	0.00915617	484	P15205	Map1b	Microtubule-associated protein 1B	MAP1B_RAT	86	21.2619	1.21262
PD7 / VD7	M0R979	M0R979	1.16167	1.16167	0.000229324	0.00957328	56	M0R979	Thbs1	Thrombospondin 1	M0R979_RAT	12	123.716	2.23716
PD7 / VD7	Q6AY21	Q6AY21	-0.329146	0.329146	0.000384575	0.014272	72	Q6AY21	G3bp2	G3BP stress granule assembly factor 2	Q6AY21_RAT	9	-20.3993	0.796007
PD7 / VD7	P17425	P17425	0.0642115	0.0642115	0.000477446	0.0160209	120	P17425	Hmgcs1	Hydroxymethylglutaryl-CoA synthase, cytoplasmic	HMCS1_RAT	20	4.55134	1.04551
PD7 / VD7	Q80U96	Q80U96	-0.0882456	0.0882456	0.000483947	0.0160209	76	Q80U96	Xpo1	Exportin-1	XPO1_RAT	17	-5.93341	0.940666
PD7 / VD7	Q6P7A7	Q6P7A7	0.236254	0.236254	0.000674319	0.0193757	140	Q6P7A7	Rpn1	Dolichyl-diphosphooligosaccharide--protein glycosyltransferase subunit 1	Q6P7A7_RAT	25	17.793	1.17793
PD7 / VD7	G3V928	G3V928	-0.0103772	0.0103772	0.000787894	0.0203563	116	G3V928	Lrp1	LDL receptor-related protein 1	G3V928_RAT	28	-0.71671	0.992833
PD7 / VD7	A0A0G2KA95;D3ZPC4	A0A0G2KA95;D3ZPC4	-0.487516	0.487516	0.000793211	0.0203563	48	A0A0G2KA95;D3ZPC4	L1cam	Neural cell adhesion molecule L1	A0A0G2KA95_RAT;D3ZPC4_RAT	11	-28.6748	0.713252
PD7 / VD7	Q60587	Q60587	0.0370494	0.0370494	0.000886859	0.0218625	100	Q60587	Hadhb	Trifunctional enzyme subunit beta, mitochondrial	ECHB_RAT	19	2.60133	1.02601
PD7 / VD7	P23711	P23711	-0.304467	0.304467	0.000989363	0.0233649	56	P23711	Hmox2	Heme oxygenase 2	HMOX2_RAT	10	-19.0259	0.809741
PD7 / VD7	F1M8K0	F1M8K0	-0.186002	0.186002	0.00118237	0.026523	100	F1M8K0	Dag1	Dystroglycan 1	F1M8K0_RAT	17	-12.0962	0.879038
PD7 / VD7	P06685	P06685	0.116945	0.116945	0.0012337	0.0267073	152	P06685	Atp1a1	Sodium/potassium-transporting ATPase subunit alpha-1	AT1A1_RAT	23	8.4436	1.08444
PD7 / VD7	Q561S0	Q561S0	0.0564419	0.0564419	0.00128148	0.0271487	72	Q561S0	Ndufa10	NADH dehydrogenase [ubiquinone] 1 alpha subcomplex subunit 10, mitochondrial	NDUAA_RAT	16	3.98979	1.0399
PD7 / VD7	Q75Q39	Q75Q39	-0.0464629	0.0464629	0.00136143	0.0277235	56	Q75Q39	Tomm70	Mitochondrial import receptor subunit TOM70	TOM70_RAT	12	-3.16925	0.968307
PD7 / VD7	Q5VLR5	Q5VLR5	-0.0530734	0.0530734	0.00156015	0.0287215	92	Q5VLR5	Erp44	BWK4	Q5VLR5_RAT	13	-3.61192	0.963881
PD7 / VD7	A0A0G2K151;P02650	A0A0G2K151;P02650	-0.233623	0.233623	0.0015406	0.0287215	64	A0A0G2K151;P02650	Apoe	Apolipoprotein E	A0A0G2K151_RAT;APOE_RAT	13	-14.9504	0.850496
PD7 / VD7	P04631	P04631	-1.429	1.429	0.00159112	0.0290628	36	P04631	S100b	Protein S100-B	S100B_RAT	4	-62.8612	0.371388
PD7 / VD7	Q00981	Q00981	-0.0202307	0.0202307	0.00161605	0.0292894	119	Q00981	Uchl1	Ubiquitin carboxyl-terminal hydrolase isozyme L1	UCHL1_RAT	12	-1.3925	0.986075
PD7 / VD7	D3ZBP4	D3ZBP4	-0.0972957	0.0972957	0.00165381	0.0297431	64	D3ZBP4	Mical1	[F-actin]-monooxygenase MICAL1	MICA1_RAT	15	-6.52164	0.934784
PD7 / VD7	F1LQC1;P07872	F1LQC1;P07872	-0.255907	0.255907	0.00194813	0.0330053	80	F1LQC1;P07872	Acox1	Acyl-coenzyme A oxidase;Peroxisomal acyl-coenzyme A oxidase 1	F1LQC1_RAT;ACOX1_RAT	17	-16.254	0.83746
PD7 / VD7	Q5U2X8	Q5U2X8	0.0819925	0.0819925	0.00208462	0.0345662	76	Q5U2X8	Acot9	Acyl-CoA thioesterase 9	Q5U2X8_RAT	17	5.84789	1.05848
PD7 / VD7	Q6P3V8	Q6P3V8	0.0369601	0.0369601	0.00210584	0.0346722	80	Q6P3V8	Eif4a1	Eukaryotic translation initiation factor 4A1	Q6P3V8_RAT	12	2.59498	1.02595
PD7 / VD7	Q9QZR6	Q9QZR6	-0.225823	0.225823	0.00221136	0.0359038	52	Q9QZR6	Septin-9	Septin-9	SEPT9_RAT	12	-14.4893	0.855107
PD7 / VD7	Q4G061	Q4G061	0.0869961	0.0869961	0.00229136	0.0364435	125	Q4G061	Eif3b	Eukaryotic translation initiation factor 3 subunit B	EIF3B_RAT	24	6.21563	1.06216
PD7 / VD7	D3ZA84	D3ZA84	0.177803	0.177803	0.00241594	0.037407	280	D3ZA84	Tln2	Talin 2	D3ZA84_RAT	61	13.116	1.13116
PD7 / VD7	B5DF91	B5DF91	-0.190594	0.190594	0.00267872	0.0386596	48	B5DF91	Elavl1	ELAV-like protein 1	ELAV1_RAT	9	-12.3755	0.876245
PD7 / VD7	A0A0G2K8H0;Q5M9G3	A0A0G2K8H0;Q5M9G3	-0.237681	0.237681	0.00266719	0.0386596	56	A0A0G2K8H0;Q5M9G3	Caprin1	Caprin-1	A0A0G2K8H0_RAT;CAPR1_RAT	11	-15.1892	0.848108
PD7 / VD7	Q642G4	Q642G4	-0.373176	0.373176	0.00264929	0.0386596	20	Q642G4	Pex14	Peroxisomal membrane protein PEX14	PEX14_RAT	5	-22.7919	0.772081
PD7 / VD7	P10111	P10111	-0.070758	0.070758	0.0027644	0.0396513	97	P10111	Ppia	Peptidyl-prolyl cis-trans isomerase A	PPIA_RAT	11	-4.78624	0.952138
PD7 / VD7	B5DEI0	B5DEI0	-0.0703801	0.0703801	0.00299864	0.0421508	56	B5DEI0	Pcyox1l	Pcyox1l protein	B5DEI0_RAT	9	-4.7613	0.952387
PD7 / VD7	D3ZJ32	D3ZJ32	-0.157631	0.157631	0.00301077	0.0421508	52	D3ZJ32	Esyt2	Extended synaptotagmin 2	D3ZJ32_RAT	12	-10.3504	0.896496
PD7 / VD7	P62198	P62198	0.0610143	0.0610143	0.00321639	0.0439761	64	P62198	Psmc5	26S proteasome regulatory subunit 8	PRS8_RAT	13	4.3199	1.0432
PD7 / VD7	G3V936	G3V936	-0.0362941	0.0362941	0.00324478	0.0441063	79	G3V936	Cs	Citrate synthase	G3V936_RAT	12	-2.48433	0.975157
PD7 / VD7	P97852;Q6IN39	P97852;Q6IN39	0.118925	0.118925	0.00327971	0.0443235	80	P97852;Q6IN39	Hsd17b4	Peroxisomal multifunctional enzyme type 2;Hsd17b4 protein	DHB4_RAT;Q6IN39_RAT	18	8.59252	1.08593
PD7 / VD7	F1LRV9	F1LRV9	1.13404	1.13404	0.00335903	0.0444713	397	F1LRV9	Myh1	Myosin-4	F1LRV9_RAT	69	119.472	2.19472
PD7 / VD7	F1LNJ2;M3ZCQ2	F1LNJ2;M3ZCQ2	0.158293	0.158293	0.00335083	0.0444713	100	F1LNJ2;M3ZCQ2	Snrnp200	U5 small nuclear ribonucleoprotein 200 kDa helicase	U520_RAT;M3ZCQ2_RAT	23	11.5966	1.11597
PD7 / VD7	Q6AYK8	Q6AYK8	-0.068768	0.068768	0.00334801	0.0444713	76	Q6AYK8	Eif3d	Eukaryotic translation initiation factor 3 subunit D	EIF3D_RAT	16	-4.65481	0.953452
PD7 / VD7	P61212	P61212	-0.428014	0.428014	0.00342106	0.0449351	32	P61212	Arl1	ADP-ribosylation factor-like protein 1	ARL1_RAT	7	-25.6716	0.743284
PD7 / VD7	B4F7B7;M0RD87	B4F7B7;M0RD87	-0.170217	0.170217	0.0035294	0.0450915	72	B4F7B7;M0RD87	Dusp15	Dual specificity protein phosphatase 15;Dual specificity phosphatase-like 15 (Predicted), isoform CRA_b	DUS15_RAT;M0RD87_RAT	12	-11.1291	0.888709
PD7 / VD7	A1L1K8	A1L1K8	-0.361105	0.361105	0.0034657	0.0450915	52	A1L1K8	Habp4	Intracellular hyaluronan-binding protein 4	HABP4_RAT	8	-22.1432	0.778568
PD7 / VD7	F7ES73	F7ES73	-0.402774	0.402774	0.00351925	0.0450915	32	F7ES73	Nub1	Negative regulator of ubiquitin-like proteins 1	F7ES73_RAT	8	-24.3598	0.756402
PD7 / VD7	F1LQN3;Q9JK11	F1LQN3;Q9JK11	0.163982	0.163982	0.00361066	0.0458789	224	F1LQN3;Q9JK11	Rtn4	Reticulon;Reticulon-4	F1LQN3_RAT;RTN4_RAT	38	12.0375	1.12037
PD7 / VD7	P54921	P54921	0.0665807	0.0665807	0.00370019	0.0462623	104	P54921	Napa	Alpha-soluble NSF attachment protein	SNAA_RAT	19	4.72317	1.04723
PD7 / VD7	Q9EPA0	Q9EPA0	0.353305	0.353305	0.00379286	0.0466754	96	Q9EPA0	Drp2	Dystrophin-related protein 2	DRP2_RAT	18	27.7484	1.27748
PD7 / VD7	A0A0G2JWH5;B4F7C9	A0A0G2JWH5;B4F7C9	-0.214581	0.214581	0.00379312	0.0466754	40	A0A0G2JWH5;B4F7C9	Stt3a	STT3 oligosaccharyltransferase complex catalytic subunit A	A0A0G2JWH5_RAT;B4F7C9_RAT	9	-13.8204	0.861796
PD7 / VD7	Q66H98	Q66H98	0.468542	0.468542	0.00398505	0.0485262	52	Q66H98	Cavin2	Caveolae-associated protein 2	CAVN2_RAT	9	38.371	1.38371
PD7 / VD7	A0A0G2JXC1;F1LRA1;Q62902	A0A0G2JXC1;F1LRA1;Q62902	-0.335686	0.335686	0.00404171	0.0489612	28	A0A0G2JXC1;F1LRA1;Q62902	Lman1	Protein ERGIC-53	A0A0G2JXC1_RAT;F1LRA1_RAT;LMAN1_RAT	5	-20.7593	0.792407
PD7 / VD7	A0A0G2JUA5	A0A0G2JUA5	-0.0506405	0.0506405	2.50252e-19	6.09615e-16	1253	A0A0G2JUA5	Ahnak	AHNAK nucleoprotein	A0A0G2JUA5_RAT	212	-3.44924	0.965508
PD7 / VD7	F1M614	F1M614	-0.202955	0.202955	9.46276e-14	1.15256e-10	692	F1M614	Lama2	Laminin subunit alpha 2	F1M614_RAT	113	-13.1231	0.868769
PD7 / VD7	M0R9X8	M0R9X8	0.167524	0.167524	5.21513e-13	4.23468e-10	1208	M0R9X8	Dync1h1	Cytoplasmic dynein 1 heavy chain 1	M0R9X8_RAT	217	12.3129	1.12313
PD7 / VD7	P16086	P16086	0.133123	0.133123	1.80668e-12	1.10027e-09	1074	P16086	Sptan1	Spectrin alpha chain, non-erythrocytic 1	SPTN1_RAT	167	9.66652	1.09667
PD7 / VD7	Q6IMZ3	Q6IMZ3	-0.0732588	0.0732588	2.33861e-09	1.13937e-06	312	Q6IMZ3	Anxa6	Annexin	Q6IMZ3_RAT	47	-4.95114	0.950489
PD7 / VD7	A0A0G2JUC7;Q6AYH5	A0A0G2JUC7;Q6AYH5	-0.515269	0.515269	1.07257e-08	3.73254e-06	100	A0A0G2JUC7;Q6AYH5	Dctn2	Dynactin subunit 2	A0A0G2JUC7_RAT;DCTN2_RAT	18	-30.0337	0.699663
PD7 / VD7	F1LM84	F1LM84	-0.0550146	0.0550146	9.59144e-09	3.73254e-06	280	F1LM84	Nid1	Nidogen-1	F1LM84_RAT	42	-3.74153	0.962585
PD7 / VD7	D3ZQN7	D3ZQN7	0.0577272	0.0577272	1.38288e-08	4.21087e-06	336	D3ZQN7	Lamb1	Laminin subunit beta 1	D3ZQN7_RAT	57	4.08248	1.04082
PD7 / VD7	P12785	P12785	0.232279	0.232279	1.74558e-08	4.72471e-06	546	P12785	Fasn	Fatty acid synthase	FAS_RAT	95	17.4689	1.17469
PD7 / VD7	A0A0G2K8W9;G3V6S0	A0A0G2K8W9;G3V6S0	0.0614752	0.0614752	2.96467e-07	7.22194e-05	841	A0A0G2K8W9;G3V6S0	Sptbn1	Spectrin beta chain	A0A0G2K8W9_RAT;G3V6S0_RAT	124	4.35322	1.04353
PD7 / VD7	F1LTJ5	F1LTJ5	0.150686	0.150686	4.59748e-07	0.000101813	408	F1LTJ5	NaN	Uncharacterized protein	F1LTJ5_RAT	66	11.0097	1.1101
PD7 / VD7	F1LTF8	F1LTF8	-0.0543407	0.0543407	1.44213e-06	0.000206966	252	F1LTF8	Lama4	Laminin subunit alpha 4	F1LTF8_RAT	47	-3.69656	0.963034
PD7 / VD7	A0A0G2JXT8;D4A8D5	A0A0G2JXT8;D4A8D5	0.0346392	0.0346392	1.20504e-06	0.000206966	516	A0A0G2JXT8;D4A8D5	Flnb	Filamin B	A0A0G2JXT8_RAT;D4A8D5_RAT	96	2.43006	1.0243
PD7 / VD7	D3ZAN3	D3ZAN3	0.0191671	0.0191671	1.32076e-06	0.000206966	168	D3ZAN3	Ganab	Alpha glucosidase 2 alpha neutral subunit (Predicted)	D3ZAN3_RAT	28	1.33743	1.01337
PD7 / VD7	D3ZL10	D3ZL10	-0.135439	0.135439	1.31433e-06	0.000206966	284	D3ZL10	Col6a6	Collagen type VI alpha 6 chain	D3ZL10_RAT	51	-8.9607	0.910393
PD7 / VD7	F1MAA7	F1MAA7	0.0496086	0.0496086	1.20318e-06	0.000206966	372	F1MAA7	Lamc1	Laminin subunit gamma 1	F1MAA7_RAT	63	3.49841	1.03498
PD7 / VD7	A0A0G2KBC7;Q52KS1	A0A0G2KBC7;Q52KS1	0.108104	0.108104	1.49794e-06	0.000206966	172	A0A0G2KBC7;Q52KS1	Pfkm	ATP-dependent 6-phosphofructokinase	A0A0G2KBC7_RAT;Q52KS1_RAT	29	7.78105	1.07781
PD7 / VD7	G3V8F8;P21263	G3V8F8;P21263	-0.298419	0.298419	1.52931e-06	0.000206966	204	G3V8F8;P21263	Nes	Nestin	G3V8F8_RAT;NEST_RAT	41	-18.6857	0.813143
PD7 / VD7	G3V6T1	G3V6T1	0.0419637	0.0419637	2.27694e-06	0.000277331	180	G3V6T1	Copa	Coatomer subunit alpha	G3V6T1_RAT	37	2.95142	1.02951
PD7 / VD7	Q63083	Q63083	-0.373192	0.373192	2.20931e-06	0.000277331	128	Q63083	Nucb1	Nucleobindin-1	NUCB1_RAT	22	-22.7928	0.772072
PD7 / VD7	P04182	P04182	0.118934	0.118934	4.96396e-06	0.000575819	128	P04182	Oat	Ornithine aminotransferase, mitochondrial	OAT_RAT	20	8.59325	1.08593
PD7 / VD7	Q5PPJ6	Q5PPJ6	-0.00286272	0.00286272	6.91215e-06	0.000765363	240	Q5PPJ6	Lars	Leucyl-tRNA synthetase	Q5PPJ6_RAT	45	-0.198232	0.998018
PD7 / VD7	A0A0G2K5E7;G3V888	A0A0G2K5E7;G3V888	0.0673764	0.0673764	7.68334e-06	0.0007835	272	A0A0G2K5E7;G3V888	Acly	ATP-citrate synthase	A0A0G2K5E7_RAT;G3V888_RAT	44	4.78095	1.04781
PD7 / VD7	P02625	P02625	-0.608474	0.608474	7.71921e-06	0.0007835	40	P02625	Pvalb	Parvalbumin alpha	PRVA_RAT	6	-34.411	0.65589
PD7 / VD7	P46462	P46462	0.208935	0.208935	1.08326e-05	0.00105553	320	P46462	Vcp	Transitional endoplasmic reticulum ATPase	TERA_RAT	49	15.5835	1.15583
PD7 / VD7	P14046	P14046	0.224722	0.224722	1.47623e-05	0.00134955	425	P14046	A1i3	Alpha-1-inhibitor 3	A1I3_RAT	55	16.8552	1.16855
PD7 / VD7	A0A0G2JVC8	A0A0G2JVC8	-0.111026	0.111026	1.49581e-05	0.00134955	60	A0A0G2JVC8	Lss	Terpene cyclase/mutase family member	A0A0G2JVC8_RAT	14	-7.40707	0.925929
PD7 / VD7	P34058	P34058	0.129432	0.129432	1.8594e-05	0.00161768	171	P34058	Hsp90ab1	Heat shock protein HSP 90-beta	HS90B_RAT	25	9.38633	1.09386
PD7 / VD7	P21807	P21807	-0.0197022	0.0197022	2.23408e-05	0.00175609	244	P21807	Prph	Peripherin	PERI_RAT	34	-1.35637	0.986436
PD7 / VD7	Q5XI78	Q5XI78	0.0907743	0.0907743	2.23476e-05	0.00175609	200	Q5XI78	Ogdh	2-oxoglutarate dehydrogenase, mitochondrial	ODO1_RAT	39	6.49416	1.06494
PD7 / VD7	P0DP29;P0DP30;P0DP31	P0DP29;P0DP30;P0DP31	-0.39175	0.39175	2.18301e-05	0.00175609	56	P0DP29;P0DP30;P0DP31	Calm1;Calm2;Calm3	Calmodulin-1;Calmodulin-2;Calmodulin-3	CALM1_RAT;CALM2_RAT;CALM3_RAT	7	-23.7796	0.762204
PD7 / VD7	A0A0G2K5C6	A0A0G2K5C6	0.00480044	0.00480044	2.35393e-05	0.00179193	428	A0A0G2K5C6	Map1a	Microtubule-associated protein 1A	A0A0G2K5C6_RAT	78	0.333295	1.00333
PD7 / VD7	P20070	P20070	-0.002792	0.002792	2.5085e-05	0.00185173	116	P20070	Cyb5r3	NADH-cytochrome b5 reductase 3	NB5R3_RAT	16	-0.193339	0.998067
PD7 / VD7	F1M779;P11442	F1M779;P11442	0.174492	0.174492	2.98446e-05	0.00207718	512	F1M779;P11442	Cltc	Clathrin heavy chain;Clathrin heavy chain 1	F1M779_RAT;CLH1_RAT	82	12.8567	1.12857
PD7 / VD7	P50137	P50137	0.106252	0.106252	2.9017e-05	0.00207718	208	P50137	Tkt	Transketolase	TKT_RAT	30	7.64281	1.07643
PD7 / VD7	Q1EG89;Q66H76	Q1EG89;Q66H76	-0.227563	0.227563	3.11857e-05	0.00211023	52	Q1EG89;Q66H76	Pxn	Myocardial ischemic preconditioning associated protein 7;Paxillin	Q1EG89_RAT;PAXI_RAT	10	-14.5924	0.854076
PD7 / VD7	D4A4Z9	D4A4Z9	0.246595	0.246595	3.42887e-05	0.0022575	286	D4A4Z9	Ktn1	Kinectin 1	D4A4Z9_RAT	48	18.6404	1.1864
PD7 / VD7	F1M6E5	F1M6E5	-0.0755011	0.0755011	3.88461e-05	0.00249024	164	F1M6E5	Nacad	NAC alpha domain-containing	F1M6E5_RAT	29	-5.09876	0.949012
PD7 / VD7	M0R6K0;P15800	M0R6K0;P15800	0.261076	0.261076	5.32144e-05	0.00308644	419	M0R6K0;P15800	Lamb2	Laminin subunit beta-2	M0R6K0_RAT;LAMB2_RAT	62	19.8372	1.19837
PD7 / VD7	F1LNF0	F1LNF0	-0.0091333	0.0091333	5.07751e-05	0.00308644	268	F1LNF0	Myh14	Myosin heavy chain 14	F1LNF0_RAT	54	-0.631072	0.993689
PD7 / VD7	Q9EQP5	Q9EQP5	-0.0977443	0.0977443	5.24168e-05	0.00308644	104	Q9EQP5	Prelp	Prolargin	PRELP_RAT	19	-6.55071	0.934493
PD7 / VD7	P07335	P07335	-0.0193822	0.0193822	5.24299e-05	0.00308644	162	P07335	Ckb	Creatine kinase B-type	KCRB_RAT	17	-1.33449	0.986655
PD7 / VD7	Q63425	Q63425	0.159732	0.159732	6.02338e-05	0.00340067	592	Q63425	Prx	Periaxin	PRAX_RAT	73	11.708	1.11708
PD7 / VD7	P02770	P02770	0.0530411	0.0530411	6.42162e-05	0.00340067	348	P02770	Alb	Serum albumin	ALBU_RAT	44	3.74495	1.03745
PD7 / VD7	P47942	P47942	0.158353	0.158353	6.1762e-05	0.00340067	261	P47942	Dpysl2	Dihydropyrimidinase-related protein 2	DPYL2_RAT	31	11.6012	1.11601
PD7 / VD7	Q9Z2L0	Q9Z2L0	-0.037784	0.037784	6.34026e-05	0.00340067	100	Q9Z2L0	Vdac1	Voltage-dependent anion-selective channel protein 1	VDAC1_RAT	18	-2.58499	0.97415
PD7 / VD7	C7E1V1;Q63269	C7E1V1;Q63269	0.0473481	0.0473481	7.1158e-05	0.0036881	232	C7E1V1;Q63269	Itpr3	Inositol 1,4,5-trisphosphate receptor type 3;Inositol 1,4,5-trisphosphate receptor type 3	C7E1V1_RAT;ITPR3_RAT	52	3.33637	1.03336
PD7 / VD7	A0A0G2K9V6;Q5XHY5	A0A0G2K9V6;Q5XHY5	-0.035359	0.035359	6.09904e-05	0.00387656	96	A0A0G2K9V6;Q5XHY5	Tars	Threonine--tRNA ligase, cytoplasmic;Threonine--tRNA ligase, cytoplasmic	A0A0G2K9V6_RAT;SYTC_RAT	20	-2.42111	0.975789
PD7 / VD7	Q6S3A3	Q6S3A3	0.145858	0.145858	7.8965e-05	0.00400747	1089	Q6S3A3	Plec	Plectin	Q6S3A3_RAT	200	10.6388	1.10639
PD7 / VD7	Q09426	Q09426	-0.71527	0.71527	8.2122e-05	0.00408264	40	Q09426	Ugt8	2-hydroxyacylsphingosine 1-beta-galactosyltransferase	CGT_RAT	8	-39.0909	0.609091
PD7 / VD7	Q641Y2	Q641Y2	0.142233	0.142233	8.93684e-05	0.00435403	120	Q641Y2	Ndufs2	NADH dehydrogenase [ubiquinone] iron-sulfur protein 2, mitochondrial	NDUS2_RAT	19	10.3612	1.10361
PD7 / VD7	P16975	P16975	-0.566949	0.566949	9.14437e-05	0.00436778	64	P16975	Sparc	SPARC	SPRC_RAT	10	-32.4957	0.675043
PD7 / VD7	D3ZUL3	D3ZUL3	-0.0668939	0.0668939	9.51851e-05	0.00437492	228	D3ZUL3	Col6a1	Collagen type VI alpha 1 chain	D3ZUL3_RAT	34	-4.53088	0.954691
PD7 / VD7	P40329	P40329	0.246649	0.246649	9.47193e-05	0.00437492	152	P40329	Rars	Arginine--tRNA ligase, cytoplasmic	SYRC_RAT	30	18.6448	1.18645
PD7 / VD7	P00388	P00388	-0.169148	0.169148	9.95603e-05	0.00449127	96	P00388	Por	NADPH--cytochrome P450 reductase	NCPR_RAT	19	-11.0633	0.889367
PD7 / VD7	P14668	P14668	-0.0825886	0.0825886	0.000102176	0.00452547	140	P14668	Anxa5	Annexin A5	ANXA5_RAT	20	-5.56383	0.944362
PD7 / VD7	Q6UPE0	Q6UPE0	0.0913694	0.0913694	0.000120017	0.00522074	80	Q6UPE0	Chdh	Choline dehydrogenase, mitochondrial	CHDH_RAT	14	6.5381	1.06538
PD7 / VD7	A0A0G2K013;Q9QXQ0	A0A0G2K013;Q9QXQ0	0.00307478	0.00307478	0.000126499	0.00540615	220	A0A0G2K013;Q9QXQ0	Actn4	Alpha-actinin-4	A0A0G2K013_RAT;ACTN4_RAT	35	0.213355	1.00213
PD7 / VD7	D4ABI7	D4ABI7	-0.213119	0.213119	0.00013195	0.0055419	48	D4ABI7	Hacd3	Very-long-chain (3R)-3-hydroxyacyl-CoA dehydratase	D4ABI7_RAT	9	-13.733	0.86267
PD7 / VD7	A0A0G2K4V5;F1LSD3	A0A0G2K4V5;F1LSD3	0.0377991	0.0377991	0.000155831	0.00611832	336	A0A0G2K4V5;F1LSD3	Itgb4	Integrin beta	A0A0G2K4V5_RAT;F1LSD3_RAT	57	2.65466	1.02655
PD7 / VD7	P63018	P63018	0.0529078	0.0529078	0.000148441	0.00611832	280	P63018	Hspa8	Heat shock cognate 71 kDa protein	HSP7C_RAT	33	3.73537	1.03735
PD7 / VD7	Q5XIA6	Q5XIA6	NaN	NaN	0.00188727	0.0285465	4	Q5XIA6	Smpd1	Sphingomyelin phosphodiesterase	Q5XIA6_RAT	1	NaN	NaN
PD7 / VD7	M0R735	M0R735	-0.0575764	0.0575764	0.000158232	0.00611832	92	M0R735	Syncrip	Heterogeneous nuclear ribonucleoprotein Q	M0R735_RAT	19	-3.91231	0.960877
PD7 / VD7	A0A096MK73;P13668	A0A096MK73;P13668	-0.5244	0.5244	0.000154472	0.00611832	28	A0A096MK73;P13668	Stmn1	Stathmin (Fragment);Stathmin	A0A096MK73_RAT;STMN1_RAT	4	-30.4752	0.695248
PD7 / VD7	P19234	P19234	-0.496425	0.496425	0.000151636	0.00611832	36	P19234	Ndufv2	NADH dehydrogenase [ubiquinone] flavoprotein 2, mitochondrial	NDUV2_RAT	7	-29.1139	0.708861
PD7 / VD7	G3V8C3;P31000	G3V8C3;P31000	0.144004	0.144004	0.000168684	0.00642052	336	G3V8C3;P31000	Vim	Vimentin	G3V8C3_RAT;VIME_RAT	39	10.4968	1.10497
PD7 / VD7	G3V9G5	G3V9G5	0.00231118	0.00231118	0.000177873	0.00652639	285	G3V9G5	Synm	RCG24674, isoform CRA_b	G3V9G5_RAT	52	0.160327	1.0016
PD7 / VD7	Q6P9V9	Q6P9V9	0.175991	0.175991	0.000179907	0.00652639	245	Q6P9V9	Tuba1b	Tubulin alpha-1B chain	TBA1B_RAT	32	12.974	1.12974
PD7 / VD7	F7EUU4	F7EUU4	-0.0292061	0.0292061	0.000182182	0.00652639	60	F7EUU4	Cops5	COP9 signalosome subunit 5	F7EUU4_RAT	13	-2.00406	0.979959
PD7 / VD7	P21571	P21571	-0.940964	0.940964	0.000178384	0.00652639	8	P21571	Atp5pf	ATP synthase-coupling factor 6, mitochondrial	ATP5J_RAT	2	-47.9115	0.520885
PD7 / VD7	D3ZAC0	D3ZAC0	1.09656	1.09656	0.000186817	0.00659544	64	D3ZAC0	Itga2b	Integrin subunit alpha 2b	D3ZAC0_RAT	12	113.844	2.13844
PD7 / VD7	P14480	P14480	1.02125	1.02125	0.00019499	0.00672247	244	P14480	Fgb	Fibrinogen beta chain	FIBB_RAT	32	102.968	2.02968
PD7 / VD7	Q05096	Q05096	0.108153	0.108153	0.000195934	0.00672247	108	Q05096	Myo1b	Unconventional myosin-Ib	MYO1B_RAT	24	7.78474	1.07785
PD7 / VD7	A0A0A0MY09;Q66HD0	A0A0A0MY09;Q66HD0	0.170661	0.170661	0.000204247	0.00691037	244	A0A0A0MY09;Q66HD0	Hsp90b1	Endoplasmin	A0A0A0MY09_RAT;ENPL_RAT	41	12.5574	1.12557
PD7 / VD7	D4A1Q2;F1LST4	D4A1Q2;F1LST4	-0.170876	0.170876	0.000216412	0.00693657	104	D4A1Q2;F1LST4	Mapt	Microtubule-associated protein	D4A1Q2_RAT;F1LST4_RAT	19	-11.1697	0.888303
PD7 / VD7	Q07009	Q07009	0.0910066	0.0910066	0.000212564	0.00693657	164	Q07009	Capn2	Calpain-2 catalytic subunit	CAN2_RAT	30	6.51131	1.06511
PD7 / VD7	G3V7C6	G3V7C6	0.031691	0.031691	0.000214236	0.00693657	224	G3V7C6	Tubb4b	Tubulin beta chain	G3V7C6_RAT	21	2.22096	1.02221
PD7 / VD7	P09495	P09495	-0.425877	0.425877	0.000210738	0.00693657	44	P09495	Tpm4	Tropomyosin alpha-4 chain	TPM4_RAT	7	-25.5614	0.744386
PD7 / VD7	P51886	P51886	-0.141614	0.141614	0.000225065	0.00712025	60	P51886	Lum	Lumican	LUM_RAT	9	-9.34958	0.906504
PD7 / VD7	A0A0H2UHM3;P06866	A0A0H2UHM3;P06866	0.495939	0.495939	0.000229333	0.00716225	84	A0A0H2UHM3;P06866	Hp	Haptoglobin	A0A0H2UHM3_RAT;HPT_RAT	13	41.0238	1.41024
PD7 / VD7	P06907	P06907	-0.031952	0.031952	0.000252981	0.00777924	132	P06907	Mpz	Myelin protein P0	MYP0_RAT	16	-2.1904	0.978096
PD7 / VD7	P62630	P62630	0.141575	0.141575	0.000255476	0.00777924	143	P62630	Eef1a1	Elongation factor 1-alpha 1	EF1A1_RAT	19	10.3109	1.10311
PD7 / VD7	B5DF57	B5DF57	1.00268	1.00268	0.000273962	0.00823915	64	B5DF57	Epb42	Erythrocyte membrane protein band 4.2	B5DF57_RAT	14	100.372	2.00372
PD7 / VD7	D4A4D5;P02401	D4A4D5;P02401	-0.327715	0.327715	0.000290513	0.00863035	52	D4A4D5;P02401	LOC498555;Rplp2	Similar to 60S acidic ribosomal protein P2;60S acidic ribosomal protein P2	D4A4D5_RAT;RLA2_RAT	8	-20.3202	0.796798
PD7 / VD7	P60881	P60881	-0.237426	0.237426	0.000319765	0.00938491	44	P60881	Snap25	Synaptosomal-associated protein 25	SNP25_RAT	8	-15.1742	0.848258
PD7 / VD7	A0A0G2JSS8;Q9R063	A0A0G2JSS8;Q9R063	-0.00125135	0.00125135	0.000337573	0.00967444	88	A0A0G2JSS8;Q9R063	Prdx5	Peroxiredoxin;Peroxiredoxin-5, mitochondrial	A0A0G2JSS8_RAT;PRDX5_RAT	13	-0.0866996	0.999133
PD7 / VD7	P10860	P10860	0.0926451	0.0926451	0.000334022	0.00967444	180	P10860	Glud1	Glutamate dehydrogenase 1, mitochondrial	DHE3_RAT	27	6.63234	1.06632
PD7 / VD7	D4A994	D4A994	-0.0878359	0.0878359	0.000395263	0.0111961	96	D4A994	Emc1	ER membrane protein complex subunit 1	D4A994_RAT	21	-5.90669	0.940933
PD7 / VD7	F1LS86	F1LS86	0.190511	0.190511	0.000421774	0.0115443	232	F1LS86	Iars	Isoleucine-tRNA synthetase (Predicted)	F1LS86_RAT	43	14.1168	1.14117
PD7 / VD7	P50399	P50399	0.19368	0.19368	0.000416968	0.0115443	199	P50399	Gdi2	Rab GDP dissociation inhibitor beta	GDIB_RAT	34	14.3677	1.14368
PD7 / VD7	Q5XHZ0	Q5XHZ0	0.2113	0.2113	0.000418791	0.0115443	96	Q5XHZ0	Trap1	Heat shock protein 75 kDa, mitochondrial	TRAP1_RAT	21	15.7731	1.15773
PD7 / VD7	A0A1W2Q669;A7M775;Q6IG11	A0A1W2Q669;A7M775;Q6IG11	1.57828	1.57828	0.000442509	0.0119772	28	A0A1W2Q669;A7M775;Q6IG11	Krt81	Keratin 81	A0A1W2Q669_RAT;A7M775_RAT;Q6IG11_RAT	6	198.613	2.98613
PD7 / VD7	P24090	P24090	-0.35515	0.35515	0.000463679	0.0122774	68	P24090	Ahsg	Alpha-2-HS-glycoprotein	FETUA_RAT	9	-21.8212	0.781788
PD7 / VD7	P19139	P19139	-0.357868	0.357868	0.000462969	0.0122774	56	P19139	Csnk2a1	Casein kinase II subunit alpha	CSK21_RAT	10	-21.9683	0.780317
PD7 / VD7	Q6JE36	Q6JE36	0.208566	0.208566	0.000481232	0.0126052	126	Q6JE36	Ndrg1	Protein NDRG1	NDRG1_RAT	13	15.5539	1.15554
PD7 / VD7	O35303	O35303	0.0668043	0.0668043	0.000488338	0.0126552	144	O35303	Dnm1l	Dynamin-1-like protein	DNM1L_RAT	27	4.7394	1.04739
PD7 / VD7	Q62703	Q62703	-0.24107	0.24107	0.000503859	0.01292	64	Q62703	Rcn2	Reticulocalbin-2	RCN2_RAT	14	-15.3883	0.846117
PD7 / VD7	G3V7J0;Q02253	G3V7J0;Q02253	-0.0118408	0.0118408	0.000514498	0.0130554	112	G3V7J0;Q02253	Aldh6a1	Aldehyde dehydrogenase family 6, subfamily A1, isoform CRA_b;Methylmalonate-semialdehyde dehydrogenase [acylating], mitochondrial	G3V7J0_RAT;MMSA_RAT	23	-0.81738	0.991826
PD7 / VD7	A0A0G2K2B3;M0R961;Q99PF5	A0A0G2K2B3;M0R961;Q99PF5	-0.372303	0.372303	0.000520982	0.0130836	48	A0A0G2K2B3;M0R961;Q99PF5	Khsrp	Far upstream element-binding protein 2	A0A0G2K2B3_RAT;M0R961_RAT;FUBP2_RAT	12	-22.7452	0.772548
PD7 / VD7	D3ZWC6	D3ZWC6	0.03122	0.03122	0.000536112	0.0133262	120	D3ZWC6	Sntb1	Syntrophin, basic 1 (Predicted)	D3ZWC6_RAT	20	2.18759	1.02188
PD7 / VD7	A0A0G2K7G7;G3V9Z6	A0A0G2K7G7;G3V9Z6	-0.14538	0.14538	0.000545473	0.0134219	64	A0A0G2K7G7;G3V9Z6	2020-09-08	Septin-8;Septin 8 (Predicted)	A0A0G2K7G7_RAT;G3V9Z6_RAT	12	-9.58589	0.904141
PD7 / VD7	G3V6Y6	G3V6Y6	0.353584	0.353584	0.000553564	0.0134848	236	G3V6Y6	Pygb	Alpha-1,4 glucan phosphorylase	G3V6Y6_RAT	37	27.773	1.27773
PD7 / VD7	D3Z955	D3Z955	-0.536054	0.536054	0.000569384	0.0137329	86	D3Z955	Pgm2l1	Phosphoglucomutase 2-like 1	D3Z955_RAT	18	-31.0345	0.689655
PD7 / VD7	F1LN42	F1LN42	0.223067	0.223067	0.000599068	0.0143071	180	F1LN42	Tns1	Tensin 1	F1LN42_RAT	37	16.7212	1.16721
PD7 / VD7	O08700	O08700	-0.154639	0.154639	0.000611421	0.0143784	52	O08700	Vps45	Vacuolar protein sorting-associated protein 45	VPS45_RAT	12	-10.1643	0.898357
PD7 / VD7	B0BMW0;P61107	B0BMW0;P61107	-0.290763	0.290763	0.000613855	0.0143784	64	B0BMW0;P61107	Rab14	RAB14, member RAS oncogene family;Ras-related protein Rab-14	B0BMW0_RAT;RAB14_RAT	10	-18.253	0.81747
PD7 / VD7	A0A096MJS3;A0A096MK47	A0A096MJS3;A0A096MK47	-0.373649	0.373649	0.000664711	0.0153275	52	A0A096MJS3;A0A096MK47	Mlip	Muscular LMNA-interacting protein (Fragment);Muscular LMNA-interacting protein	A0A096MJS3_RAT;MLIP_RAT	9	-22.8172	0.771828
PD7 / VD7	P47860	P47860	0.146653	0.146653	0.00066696	0.0153275	212	P47860	Pfkp	ATP-dependent 6-phosphofructokinase, platelet type	PFKAP_RAT	33	10.6999	1.107
PD7 / VD7	M0RBF1;M0RBJ7	M0RBF1;M0RBJ7	0.297556	0.297556	0.000762137	0.0173511	465	M0RBF1;M0RBJ7	C3	Complement C3	M0RBF1_RAT;M0RBJ7_RAT	76	22.906	1.22906
PD7 / VD7	Q6MG49	Q6MG49	-0.202004	0.202004	0.000777691	0.0173803	44	Q6MG49	Bag6	Large proline-rich protein BAG6	BAG6_RAT	11	-13.0658	0.869342
PD7 / VD7	F1LRI5	F1LRI5	-0.164464	0.164464	0.000773972	0.0173803	84	F1LRI5	Gcn1	GCN1 activator of EIF2AK4	F1LRI5_RAT	20	-10.774	0.89226
PD7 / VD7	P29975	P29975	0.434939	0.434939	0.000836464	0.0185239	12	P29975	Aqp1	Aquaporin-1	AQP1_RAT	2	35.1854	1.35185
PD7 / VD7	P37397	P37397	-0.239117	0.239117	0.000848448	0.01862	64	P37397	Cnn3	Calponin-3	CNN3_RAT	10	-15.2736	0.847264
PD7 / VD7	F1LRJ9;Q8VIF7	F1LRJ9;Q8VIF7	-0.15969	0.15969	0.000865404	0.0188225	72	F1LRJ9;Q8VIF7	Selenbp1	Methanethiol oxidase	F1LRJ9_RAT;SBP1_RAT	15	-10.4783	0.895217
PD7 / VD7	F1LUD3	F1LUD3	-0.0383424	0.0383424	0.000917001	0.0189306	240	F1LUD3	NaN	Uncharacterized protein	F1LUD3_RAT	49	-2.62269	0.973773
PD7 / VD7	Q9Z1X1	Q9Z1X1	0.0680346	0.0680346	0.00089141	0.0189306	196	Q9Z1X1	Esyt1	Extended synaptotagmin-1	ESYT1_RAT	36	4.82876	1.04829
PD7 / VD7	P18418	P18418	0.243692	0.243692	0.000896011	0.0189306	139	P18418	Calr	Calreticulin	CALR_RAT	19	18.4019	1.18402
PD7 / VD7	B5DFL0	B5DFL0	-0.165877	0.165877	0.000906773	0.0189306	56	B5DFL0	Snta1	Snta1 protein	B5DFL0_RAT	11	-10.8614	0.891386
PD7 / VD7	P15650	P15650	-0.00276213	0.00276213	0.000910051	0.0189306	80	P15650	Acadl	Long-chain specific acyl-CoA dehydrogenase, mitochondrial	ACADL_RAT	14	-0.191273	0.998087
PD7 / VD7	P41562	P41562	0.226318	0.226318	0.000906959	0.0189306	88	P41562	Idh1	Isocitrate dehydrogenase [NADP] cytoplasmic	IDHC_RAT	17	16.9845	1.16985
PD7 / VD7	A0A0G2K022;I6L9G5	A0A0G2K022;I6L9G5	-0.279963	0.279963	0.00092985	0.0190346	44	A0A0G2K022;I6L9G5	Rcn3	Reticulocalbin-3	A0A0G2K022_RAT;RCN3_RAT	9	-17.6388	0.823612
PD7 / VD7	P11530	P11530	0.0074871	0.0074871	0.000972359	0.0196323	168	P11530	Dmd	Dystrophin	DMD_RAT	32	0.520316	1.0052
PD7 / VD7	P11980	P11980	0.113928	0.113928	0.000983228	0.0196323	228	P11980	Pkm	Pyruvate kinase PKM	KPYM_RAT	33	8.21706	1.08217
PD7 / VD7	F1M9Q8	F1M9Q8	-0.302482	0.302482	0.000981464	0.0196323	56	F1M9Q8	Agps	Alkylglycerone-phosphate synthase	F1M9Q8_RAT	13	-18.9144	0.810856
PD7 / VD7	P62815	P62815	0.270168	0.270168	0.000995756	0.0197208	120	P62815	Atp6v1b2	V-type proton ATPase subunit B, brain isoform	VATB2_RAT	22	20.5949	1.20595
PD7 / VD7	P85973	P85973	0.158377	0.158377	0.0010327	0.0202876	96	P85973	Pnp	Purine nucleoside phosphorylase	PNPH_RAT	16	11.6031	1.11603
PD7 / VD7	P82995	P82995	0.196699	0.196699	0.00105084	0.0203477	282	P82995	Hsp90aa1	Heat shock protein HSP 90-alpha	HS90A_RAT	39	14.6073	1.14607
PD7 / VD7	Q794E4	Q794E4	-0.00612165	0.00612165	0.00105247	0.0203477	60	Q794E4	Hnrnpf	Heterogeneous nuclear ribonucleoprotein F	HNRPF_RAT	9	-0.423422	0.995766
PD7 / VD7	P62483	P62483	-0.106116	0.106116	0.00114022	0.0204811	64	P62483	Kcnab2	Voltage-gated potassium channel subunit beta-2	KCAB2_RAT	12	-7.09143	0.929086
PD7 / VD7	Q6LED0	Q6LED0	0.0913688	0.0913688	0.00114344	0.0204811	28	Q6LED0	NaN	Histone H3.1	H31_RAT	4	6.53805	1.06538
PD7 / VD7	A0A0G2JVH4	A0A0G2JVH4	0.455714	0.455714	0.00111247	0.0204811	160	A0A0G2JVH4	Immt	MICOS complex subunit MIC60	A0A0G2JVH4_RAT	25	37.1461	1.37146
PD7 / VD7	D3Z941	D3Z941	0.0166207	0.0166207	0.00112097	0.0204811	200	D3Z941	Mars	Methionyl-tRNA synthetase	D3Z941_RAT	39	1.15872	1.01159
PD7 / VD7	G3V6P7	G3V6P7	0.288411	0.288411	0.0010802	0.0204811	550	G3V6P7	Myh9	Myosin heavy chain 9-like 1	G3V6P7_RAT	84	22.1295	1.22129
PD7 / VD7	P04639	P04639	-0.501557	0.501557	0.00111115	0.0204811	88	P04639	Apoa1	Apolipoprotein A-I	APOA1_RAT	13	-29.3656	0.706344
PD7 / VD7	P41542	P41542	0.212272	0.212272	0.00113917	0.0204811	144	P41542	Uso1	General vesicular transport factor p115	USO1_RAT	26	15.8512	1.15851
PD7 / VD7	P23514	P23514	0.209578	0.209578	0.00107415	0.0204811	144	P23514	Copb1	Coatomer subunit beta	COPB_RAT	27	15.635	1.15635
PD7 / VD7	A0A0G2K502;D3ZJH9	A0A0G2K502;D3ZJH9	-0.0388908	0.0388908	0.00110061	0.0204811	100	A0A0G2K502;D3ZJH9	Me2	Malic enzyme	A0A0G2K502_RAT;D3ZJH9_RAT	22	-2.6597	0.973403
PD7 / VD7	A0A0G2K761;D4A0H4	A0A0G2K761;D4A0H4	-0.704199	0.704199	0.00113276	0.0204811	24	A0A0G2K761;D4A0H4	Cul2	Cullin 2	A0A0G2K761_RAT;D4A0H4_RAT	6	-38.6217	0.613783
PD7 / VD7	Q5U300	Q5U300	0.300627	0.300627	0.00116825	0.0207728	244	Q5U300	Uba1	Ubiquitin-like modifier-activating enzyme 1	UBA1_RAT	40	23.168	1.23168
PD7 / VD7	A0A0H2UI38;D4A6G6;P17074	A0A0H2UI38;D4A6G6;P17074	-0.257394	0.257394	0.00118457	0.0209102	52	A0A0H2UI38;D4A6G6;P17074	Rps19l2;LOC100362339;Rps19	Ribosomal protein S19-like2;Ribosomal protein S19-like;40S ribosomal protein S19	A0A0H2UI38_RAT;D4A6G6_RAT;RS19_RAT	8	-16.3402	0.836598
PD7 / VD7	P11497	P11497	-0.184013	0.184013	0.00120095	0.0210468	120	P11497	Acaca	Acetyl-CoA carboxylase 1	ACACA_RAT	28	-11.9749	0.880251
PD7 / VD7	Q68FU3	Q68FU3	0.213268	0.213268	0.00123486	0.0214866	68	Q68FU3	Etfb	Electron transfer flavoprotein subunit beta	ETFB_RAT	13	15.9311	1.15931
PD7 / VD7	P56571	P56571	0.230634	0.230634	0.00125504	0.0216828	56	P56571	NaN	ES1 protein homolog, mitochondrial	ES1_RAT	7	17.335	1.17335
PD7 / VD7	D3ZAF6	D3ZAF6	-0.136568	0.136568	0.00129956	0.0222938	16	D3ZAF6	Atp5mf	ATP synthase subunit f, mitochondrial	ATPK_RAT	3	-9.03191	0.909681
PD7 / VD7	Q5RKI1	Q5RKI1	0.115878	0.115878	0.00137015	0.0233404	155	Q5RKI1	Eif4a2	Eukaryotic initiation factor 4A-II	IF4A2_RAT	23	8.36342	1.08363
PD7 / VD7	Q6PCT9	Q6PCT9	-0.229438	0.229438	0.00138073	0.0233573	68	Q6PCT9	Psmd6	Proteasome (Prosome, macropain) 26S subunit, non-ATPase, 6	Q6PCT9_RAT	12	-14.7033	0.852967
PD7 / VD7	Q6P502	Q6P502	-0.000880519	0.000880519	0.00141025	0.0236922	164	Q6P502	Cct3	T-complex protein 1 subunit gamma	TCPG_RAT	29	-0.0610143	0.99939
PD7 / VD7	B5DF55	B5DF55	-0.290662	0.290662	0.00142786	0.0238237	48	B5DF55	Stam	RCG55706	B5DF55_RAT	11	-18.2473	0.817527
PD7 / VD7	P19132;Q66HI5	P19132;Q66HI5	-0.827967	0.827967	0.00145251	0.0240702	28	P19132;Q66HI5	Fth1	Ferritin heavy chain;Ferritin	FRIH_RAT;Q66HI5_RAT	5	-43.6677	0.563323
PD7 / VD7	P62909	P62909	0.0789623	0.0789623	0.00154627	0.0254508	96	P62909	Rps3	40S ribosomal protein S3	RS3_RAT	16	5.6258	1.05626
PD7 / VD7	A0A0G2K1Q9;Q9JMB3	A0A0G2K1Q9;Q9JMB3	0.288552	0.288552	0.00161104	0.0263388	248	A0A0G2K1Q9;Q9JMB3	Epb41l3	Erythrocyte membrane protein band 4.1-like 3	A0A0G2K1Q9_RAT;Q9JMB3_RAT	39	22.1413	1.22141
PD7 / VD7	Q2TA68	Q2TA68	-0.0606906	0.0606906	0.00167134	0.0271425	132	Q2TA68	Opa1	Dynamin-like 120 kDa protein, mitochondrial	OPA1_RAT	24	-4.11949	0.958805
PD7 / VD7	Q5XI22	Q5XI22	-0.0683528	0.0683528	0.00171069	0.0275977	76	Q5XI22	Acat2	Acetyl-CoA acetyltransferase, cytosolic	THIC_RAT	11	-4.62737	0.953726
PD7 / VD7	A0A0H2UHP1;P51647	A0A0H2UHP1;P51647	0.0468027	0.0468027	0.00174179	0.0279144	108	A0A0H2UHP1;P51647	Aldh1a1	Retinal dehydrogenase 1	A0A0H2UHP1_RAT;AL1A1_RAT	19	3.29731	1.03297
PD7 / VD7	G3V8T4	G3V8T4	0.0726492	0.0726492	0.00180999	0.0282637	100	G3V8T4	Ddb1	DNA damage-binding protein 1	G3V8T4_RAT	23	5.16461	1.05165
PD7 / VD7	P61354	P61354	-0.103269	0.103269	0.00180862	0.0282637	56	P61354	Rpl27	60S ribosomal protein L27	RL27_RAT	7	-6.90786	0.930921
PD7 / VD7	D4A8H8	D4A8H8	0.175452	0.175452	0.00180573	0.0282637	84	D4A8H8	Cyfip1	Cytoplasmic FMR1-interacting protein	D4A8H8_RAT	20	12.9318	1.12932
PD7 / VD7	A0A0G2KBC0;F8WFF9;Q5FVI3	A0A0G2KBC0;F8WFF9;Q5FVI3	-0.856204	0.856204	0.0018092	0.0282637	12	A0A0G2KBC0;F8WFF9;Q5FVI3	Lrrc57	Leucine-rich repeat-containing protein 57	A0A0G2KBC0_RAT;F8WFF9_RAT;LRC57_RAT	3	-44.7596	0.552404
PD7 / VD7	F1MAN8	F1MAN8	0.0753679	0.0753679	0.00182999	0.0283246	208	F1MAN8	Lama5	Laminin subunit alpha 5	F1MAN8_RAT	45	5.36297	1.05363
PD7 / VD7	P04256;Q5I0M7;Q6P6G9	P04256;Q5I0M7;Q6P6G9	-0.0584672	0.0584672	0.00183715	0.0283246	84	P04256;Q5I0M7;Q6P6G9	Hnrnpa1	Heterogeneous nuclear ribonucleoprotein A1	ROA1_RAT;Q5I0M7_RAT;Q6P6G9_RAT	13	-3.97162	0.960284
PD7 / VD7	Q6P6R2	Q6P6R2	-0.0242507	0.0242507	0.00189238	0.0285465	88	Q6P6R2	Dld	Dihydrolipoyl dehydrogenase, mitochondrial	DLDH_RAT	14	-1.66688	0.983331
PD7 / VD7	D3ZZC1	D3ZZC1	-0.0120139	0.0120139	0.00189841	0.0285465	72	D3ZZC1	Txndc5	RCG43947	D3ZZC1_RAT	13	-0.829286	0.991707
PD7 / VD7	Q6URK4	Q6URK4	0.000561594	0.000561594	0.00188106	0.0285465	112	Q6URK4	Hnrnpa3	Heterogeneous nuclear ribonucleoprotein A3	ROA3_RAT	18	0.0389343	1.00039
PD7 / VD7	Q7TQ70	Q7TQ70	1.06846	1.06846	0.00191962	0.0286884	240	Q7TQ70	Fga	Ac1873	Q7TQ70_RAT	31	109.719	2.09719
PD7 / VD7	A0A0H2UHX3;P62703;X1WI37	A0A0H2UHX3;P62703;X1WI37	0.0164346	0.0164346	0.00195085	0.0289772	96	A0A0H2UHX3;P62703;X1WI37	Rps4x	40S ribosomal protein S4;40S ribosomal protein S4, X isoform;40S ribosomal protein S4	A0A0H2UHX3_RAT;RS4X_RAT;X1WI37_RAT	14	1.14567	1.01146
PD7 / VD7	Q68FQ0	Q68FQ0	-0.318971	0.318971	0.00198292	0.0292751	159	Q68FQ0	Cct5	T-complex protein 1 subunit epsilon	TCPE_RAT	23	-19.8358	0.801642
PD7 / VD7	Q5BJT9	Q5BJT9	0.0903624	0.0903624	0.00199627	0.0292946	92	Q5BJT9	Ckmt1	Creatine kinase U-type, mitochondrial	Q5BJT9_RAT	14	6.46376	1.06464
PD7 / VD7	P85845	P85845	0.197852	0.197852	0.00205829	0.0300126	96	P85845	Fscn1	Fascin	FSCN1_RAT	17	14.699	1.14699
PD7 / VD7	A0A0G2K9L2	A0A0G2K9L2	-0.132757	0.132757	0.00209448	0.0300126	88	A0A0G2K9L2	Tom1l2	Target of myb1-like 2 membrane-trafficking protein	A0A0G2K9L2_RAT	17	-8.79134	0.912087
PD7 / VD7	D3ZCF8;D3ZXD2	D3ZCF8;D3ZXD2	0.0830037	0.0830037	0.00209097	0.0300126	212	D3ZCF8;D3ZXD2	Abca8a	ATP-binding cassette, subfamily A (ABC1), member 8a;ATP-binding cassette, subfamily A (ABC1), member 8a	D3ZCF8_RAT;D3ZXD2_RAT	37	5.92211	1.05922
PD7 / VD7	G3V6D3;P10719	G3V6D3;P10719	0.10783	0.10783	0.00209139	0.0300126	244	G3V6D3;P10719	Atp5f1b	ATP synthase subunit beta;ATP synthase subunit beta, mitochondrial	G3V6D3_RAT;ATPB_RAT	28	7.76059	1.07761
PD7 / VD7	D4A8U7	D4A8U7	0.162223	0.162223	0.0021656	0.0308503	240	D4A8U7	Dctn1	Dynactin 1, isoform CRA_a	D4A8U7_RAT	41	11.901	1.11901
PD7 / VD7	A0A0A0MXY4;A0A0G2JU73;A0A1W2Q676;F1LP64	A0A0A0MXY4;A0A0G2JU73;A0A1W2Q676;F1LP64	NaN	NaN	0.00673483	0.0601964	4	A0A0A0MXY4;A0A0G2JU73;A0A1W2Q676;F1LP64	Trip12	E3 ubiquitin-protein ligase TRIP12	A0A0A0MXY4_RAT;A0A0G2JU73_RAT;A0A1W2Q676_RAT;TRIPC_RAT	1	NaN	NaN
PD7 / VD7	A0A0G2JT93	A0A0G2JT93	0.598255	0.598255	0.00222425	0.0314593	151	A0A0G2JT93	Ctnnb1	Catenin (Cadherin associated protein), beta 1, isoform CRA_a	A0A0G2JT93_RAT	27	51.3885	1.51388
PD7 / VD7	F1LNH3	F1LNH3	-0.0709415	0.0709415	0.00223418	0.0314593	160	F1LNH3	Col6a2	Collagen type VI alpha 2 chain	F1LNH3_RAT	22	-4.79835	0.952017
PD7 / VD7	Q924N5	Q924N5	0.147998	0.147998	0.00227689	0.0318764	140	Q924N5	Acsbg1	Long-chain-fatty-acid--CoA ligase ACSBG1	ACBG1_RAT	27	10.8031	1.10803
PD7 / VD7	G3V6L9	G3V6L9	-0.25963	0.25963	0.00234835	0.032689	52	G3V6L9	Fkbp3	Peptidylprolyl isomerase	G3V6L9_RAT	8	-16.4698	0.835302
PD7 / VD7	P00507	P00507	0.181313	0.181313	0.00244057	0.0337797	172	P00507	Got2	Aspartate aminotransferase, mitochondrial	AATM_RAT	25	13.3915	1.13392
PD7 / VD7	A0A0G2JW88	A0A0G2JW88	0.00323802	0.00323802	0.00250702	0.034128	196	A0A0G2JW88	Map4	Microtubule-associated protein	A0A0G2JW88_RAT	36	0.224695	1.00225
PD7 / VD7	O08839	O08839	-0.387207	0.387207	0.00248918	0.034128	64	O08839	Bin1	Myc box-dependent-interacting protein 1	BIN1_RAT	11	-23.5392	0.764608
PD7 / VD7	Q5QD51	Q5QD51	-0.0421131	0.0421131	0.00250807	0.034128	210	Q5QD51	Akap12	A-kinase anchor protein 12	AKA12_RAT	42	-2.87686	0.971231
PD7 / VD7	Q32Q06	Q32Q06	-0.136269	0.136269	0.00252178	0.034128	52	Q32Q06	Ap1m1	AP-1 complex subunit mu-1	AP1M1_RAT	11	-9.0131	0.909869
PD7 / VD7	P02651	P02651	-0.909535	0.909535	0.00259171	0.0348807	12	P02651	Apoa4	Apolipoprotein A-IV	APOA4_RAT	3	-46.7643	0.532357
PD7 / VD7	P62804	P62804	0.0424325	0.0424325	0.0027256	0.0361463	96	P62804	Hist1h4b	Histone H4	H4_RAT	12	2.98488	1.02985
PD7 / VD7	Q4G079	Q4G079	-0.0818336	0.0818336	0.00272232	0.0361463	76	Q4G079	Aimp1	Aminoacyl tRNA synthetase complex-interacting multifunctional protein 1	Q4G079_RAT	13	-5.5144	0.944856
PD7 / VD7	A0A0G2JSP8	A0A0G2JSP8	-0.188613	0.188613	0.00273026	0.0361463	113	A0A0G2JSP8	Ckm	Creatine kinase M-type	A0A0G2JSP8_RAT	17	-12.2551	0.877449
PD7 / VD7	A0A0G2JZI2	A0A0G2JZI2	-0.0180401	0.0180401	0.00283852	0.0370354	368	A0A0G2JZI2	Eprs	Glutamyl-prolyl-tRNA synthetase	A0A0G2JZI2_RAT	61	-1.24266	0.987573
PD7 / VD7	P13233	P13233	-0.016283	0.016283	0.00281263	0.0370354	140	P13233	Cnp	2',3'-cyclic-nucleotide 3'-phosphodiesterase	CN37_RAT	20	-1.1223	0.988777
PD7 / VD7	G3V949	G3V949	0.0142694	0.0142694	0.00286487	0.0370354	124	G3V949	Clip2	CAP-Gly domain-containing linker protein 2	G3V949_RAT	25	0.993988	1.00994
PD7 / VD7	P16970	P16970	-0.289145	0.289145	0.00287328	0.0370354	52	P16970	Abcd3	ATP-binding cassette sub-family D member 3	ABCD3_RAT	10	-18.1613	0.818387
PD7 / VD7	F1LP82	F1LP82	-0.171552	0.171552	0.00287344	0.0370354	72	F1LP82	Rab2a	Ras-related protein Rab-2A	F1LP82_RAT	13	-11.2113	0.887887
PD7 / VD7	Q6MG60	Q6MG60	-0.216145	0.216145	0.00289528	0.0371205	68	Q6MG60	Ddah2	N(G),N(G)-dimethylarginine dimethylaminohydrolase 2	DDAH2_RAT	11	-13.9137	0.860863
PD7 / VD7	A0A0G2K3I9;G3V9L3	A0A0G2K3I9;G3V9L3	-0.364546	0.364546	0.00293584	0.0374435	40	A0A0G2K3I9;G3V9L3	Dusp3	Dual-specificity phosphatase 3	A0A0G2K3I9_RAT;G3V9L3_RAT	7	-22.3287	0.776713
PD7 / VD7	Q9JJ19	Q9JJ19	-0.127292	0.127292	0.00300984	0.0377936	44	Q9JJ19	Slc9a3r1	Na(+)/H(+) exchange regulatory cofactor NHE-RF1	NHRF1_RAT	9	-8.44515	0.915549
PD7 / VD7	D3ZD97	D3ZD97	0.0848862	0.0848862	0.00300062	0.0377936	76	D3ZD97	Dhx15	DEAH (Asp-Glu-Ala-His) box polypeptide 15 (Predicted), isoform CRA_b	D3ZD97_RAT	17	6.06041	1.0606
PD7 / VD7	M0RC17	M0RC17	-0.215058	0.215058	0.00299513	0.0377936	60	M0RC17	Chl1	Cell adhesion molecule L1-like	M0RC17_RAT	13	-13.8489	0.861511
PD7 / VD7	Q6AYS7	Q6AYS7	-0.00679699	0.00679699	0.00302941	0.0378443	80	Q6AYS7	Acy1a	Aminoacylase-1A	ACY1A_RAT	14	-0.470024	0.9953
PD7 / VD7	M0R3N4	M0R3N4	0.0524563	0.0524563	0.00305841	0.0380117	128	M0R3N4	Vat1l	Vesicle amine transport 1-like	M0R3N4_RAT	20	3.7029	1.03703
PD7 / VD7	D3ZFY8	D3ZFY8	0.557367	0.557367	0.00310877	0.0384414	8	D3ZFY8	LOC100912618	Ubiquitin-conjugating enzyme E2 V1	D3ZFY8_RAT	2	47.1581	1.47158
PD7 / VD7	O35142	O35142	-0.0168371	0.0168371	0.00325253	0.0393388	140	O35142	Copb2	Coatomer subunit beta'	COPB2_RAT	28	-1.16028	0.988397
PD7 / VD7	P18422	P18422	0.101859	0.101859	0.00326209	0.0393388	48	P18422	Psma3	Proteasome subunit alpha type-3	PSA3_RAT	7	7.31557	1.07316
PD7 / VD7	O35112	O35112	-0.108551	0.108551	0.00323124	0.0393388	100	O35112	Alcam	CD166 antigen	CD166_RAT	17	-7.24808	0.927519
PD7 / VD7	Q641Y0	Q641Y0	-0.0862277	0.0862277	0.00323863	0.0393388	84	Q641Y0	Ddost	Dolichyl-diphosphooligosaccharide--protein glycosyltransferase 48 kDa subunit	OST48_RAT	16	-5.80174	0.941983
PD7 / VD7	A1A5L1;P70645	A1A5L1;P70645	-0.249015	0.249015	0.00326137	0.0393388	40	A1A5L1;P70645	Blmh	Bleomycin hydrolase	A1A5L1_RAT;BLMH_RAT	7	-15.8529	0.841471
PD7 / VD7	P11232	P11232	-0.0417744	0.0417744	0.00334533	0.040144	40	P11232	Txn	Thioredoxin	THIO_RAT	6	-2.85406	0.971459
PD7 / VD7	D4A133	D4A133	0.128818	0.128818	0.00338111	0.0403394	164	D4A133	Atp6v1a	ATPase H+-transporting V1 subunit A	D4A133_RAT	30	9.33977	1.0934
PD7 / VD7	A0A0G2JZ13;D3ZGE6;Q66HL2	A0A0G2JZ13;D3ZGE6;Q66HL2	-0.0281577	0.0281577	0.00339474	0.0403394	56	A0A0G2JZ13;D3ZGE6;Q66HL2	Cttn	Src substrate cortactin;Cortactin, isoform CRA_c;Src substrate cortactin	A0A0G2JZ13_RAT;D3ZGE6_RAT;SRC8_RAT	11	-1.93282	0.980672
PD7 / VD7	Q6MG55	Q6MG55	-0.0805172	0.0805172	0.00350068	0.0410067	52	Q6MG55	Abhd16a	Phosphatidylserine lipase ABHD16A	ABHGA_RAT	13	-5.42815	0.945719
PD7 / VD7	D3ZYS7	D3ZYS7	-0.0482546	0.0482546	0.00350139	0.0410067	64	D3ZYS7	G3bp1	G3BP stress granule assembly factor 1	D3ZYS7_RAT	11	-3.28944	0.967106
PD7 / VD7	Q5RJR9	Q5RJR9	-0.0191349	0.0191349	0.00349632	0.0410067	143	Q5RJR9	Serpinh1	Serine (Or cysteine) proteinase inhibitor, clade H, member 1, isoform CRA_b	Q5RJR9_RAT	21	-1.31757	0.986824
PD7 / VD7	A0A0G2K9A2;P85970	A0A0G2K9A2;P85970	-0.0566873	0.0566873	0.00353301	0.041179	132	A0A0G2K9A2;P85970	Arpc2	Arp2/3 complex 34 kDa subunit;Actin-related protein 2/3 complex subunit 2	A0A0G2K9A2_RAT;ARPC2_RAT	20	-3.85307	0.961469
PD7 / VD7	Q4V8H8	Q4V8H8	0.041514	0.041514	0.00362731	0.0420767	160	Q4V8H8	Ehd2	EH domain-containing protein 2	EHD2_RAT	28	2.91933	1.02919
PD7 / VD7	O35244	O35244	-0.162622	0.162622	0.00368128	0.0423	76	O35244	Prdx6	Peroxiredoxin-6	PRDX6_RAT	15	-10.66	0.8934
PD7 / VD7	Q6P9V7	Q6P9V7	-0.523333	0.523333	0.00366676	0.0423	28	Q6P9V7	Psme1	Proteasome (Prosome, macropain) activator subunit 1	Q6P9V7_RAT	7	-30.4237	0.695763
PD7 / VD7	Q07936	Q07936	-0.0232933	0.0232933	0.00371818	0.0425234	188	Q07936	Anxa2	Annexin A2	ANXA2_RAT	25	-1.6016	0.983984
PD7 / VD7	Q6P3V9	Q6P3V9	0.089713	0.089713	0.00375573	0.0427522	132	Q6P3V9	Rpl4	60S ribosomal protein L4	Q6P3V9_RAT	21	6.41585	1.06416
PD7 / VD7	M0R402	M0R402	-0.0352128	0.0352128	0.00378856	0.0427923	48	M0R402	Tmx3	Thioredoxin-related transmembrane protein 3	M0R402_RAT	9	-2.41122	0.975888
PD7 / VD7	A0A0G2JZG7	A0A0G2JZG7	0.0346398	0.0346398	0.00381196	0.0427923	144	A0A0G2JZG7	Sars	Serine--tRNA ligase, cytoplasmic	A0A0G2JZG7_RAT	27	2.43011	1.0243
PD7 / VD7	P11030;Q6TXF3	P11030;Q6TXF3	-1.12593	1.12593	0.00380319	0.0427923	16	P11030;Q6TXF3	Dbi	Acyl-CoA-binding protein	ACBP_RAT;Q6TXF3_RAT	2	-54.1795	0.458205
PD7 / VD7	Q9ER34	Q9ER34	0.242475	0.242475	0.0038761	0.0430952	225	Q9ER34	Aco2	Aconitate hydratase, mitochondrial	ACON_RAT	35	18.3021	1.18302
PD7 / VD7	D4ADF5	D4ADF5	-0.597234	0.597234	0.00392739	0.0430952	16	D4ADF5	Pdcd5	Programmed cell death 5	D4ADF5_RAT	4	-33.898	0.66102
PD7 / VD7	P38983	P38983	-0.250891	0.250891	0.00390453	0.0430952	68	P38983	Rpsa	40S ribosomal protein SA	RSSA_RAT	12	-15.9623	0.840377
PD7 / VD7	F1M471	F1M471	-0.15543	0.15543	0.0039165	0.0430952	44	F1M471	Epm2aip1	EPM2A-interacting protein 1	F1M471_RAT	10	-10.2135	0.897865
PD7 / VD7	P62329	P62329	-0.643754	0.643754	0.00390851	0.0430952	16	P62329	Tmsb4x	Thymosin beta-4	TYB4_RAT	2	-35.9955	0.640045
PD7 / VD7	P19804	P19804	-0.0981685	0.0981685	0.00395431	0.043196	96	P19804	Nme2	Nucleoside diphosphate kinase B	NDKB_RAT	11	-6.57817	0.934218
PD7 / VD7	A0A0G2JV12;F1LPD0	A0A0G2JV12;F1LPD0	-0.0069466	0.0069466	0.00401617	0.043531	96	A0A0G2JV12;F1LPD0	Col15a1;LOC108348074	Collagen type XV alpha 1 chain;Collagen alpha-1(XV) chain-like	A0A0G2JV12_RAT;F1LPD0_RAT	18	-0.480344	0.995197
PD7 / VD7	A0A0G2JSZ5;Q63081	A0A0G2JSZ5;Q63081	0.0097285	0.0097285	0.00402072	0.043531	84	A0A0G2JSZ5;Q63081	Pdia6	Protein disulfide-isomerase A6	A0A0G2JSZ5_RAT;PDIA6_RAT	15	0.676607	1.00677
PD7 / VD7	Q6V7V2	Q6V7V2	-0.196123	0.196123	0.00405437	0.0437011	68	Q6V7V2	Rtkn	Rhotekin	RTKN_RAT	13	-12.7107	0.872893
PD7 / VD7	P05370	P05370	-0.0715285	0.0715285	0.00418791	0.0447445	112	P05370	G6pdx	Glucose-6-phosphate 1-dehydrogenase	G6PD_RAT	21	-4.83708	0.951629
PD7 / VD7	D3ZD73	D3ZD73	-0.201387	0.201387	0.00418321	0.0447445	76	D3ZD73	Ddx6	DEAD-box helicase 6	D3ZD73_RAT	13	-13.0286	0.869714
PD7 / VD7	F1M1B3	F1M1B3	-0.326605	0.326605	0.00422502	0.0449439	44	F1M1B3	Washc5	WASH complex subunit 5	F1M1B3_RAT	11	-20.2589	0.797411
PD7 / VD7	Q4QQV4	Q4QQV4	0.118439	0.118439	0.00426905	0.0452148	84	Q4QQV4	Hars	Dead end homolog 1 (Zebrafish)	Q4QQV4_RAT	19	8.55599	1.08556
PD7 / VD7	B0BMW2;O70351	B0BMW2;O70351	-0.0806087	0.0806087	0.00434799	0.0458515	96	B0BMW2;O70351	Hsd17b10	3-hydroxyacyl-CoA dehydrogenase type-2	B0BMW2_RAT;HCD2_RAT	18	-5.43414	0.945659
PD7 / VD7	D3ZJF9	D3ZJF9	-0.203731	0.203731	0.00438765	0.0460703	52	D3ZJF9	Gla	Alpha-galactosidase	D3ZJF9_RAT	9	-13.1698	0.868302
PD7 / VD7	A0A0G2K3L9;A0A1B0GWM2;A0A1B0GWS0;A0A1B0GWW5;D3ZZ81;F1M863;F1M8A4;Q91Z80	A0A0G2K3L9;A0A1B0GWM2;A0A1B0GWS0;A0A1B0GWW5;D3ZZ81;F1M863;F1M8A4;Q91Z80	NaN	NaN	0.010282	0.0747739	4	A0A0G2K3L9;A0A1B0GWM2;A0A1B0GWS0;A0A1B0GWW5;D3ZZ81;F1M863;F1M8A4;Q91Z80	Ppfia1;Ppfia1;Ppfia1;Ppfia1;Ppfia1;Ppfia4;Ppfia2;Ppfia4	PTPRF-interacting protein alpha 1;PTPRF-interacting protein alpha 1;PTPRF-interacting protein alpha 1;PTPRF-interacting protein alpha 1 (Fragment);PTPRF-interacting protein alpha 1;Liprin-alpha-4;PTPRF-interacting protein alpha 2;Liprin-alpha-4 (Fragment)	A0A0G2K3L9_RAT;A0A1B0GWM2_RAT;A0A1B0GWS0_RAT;A0A1B0GWW5_RAT;D3ZZ81_RAT;F1M863_RAT;F1M8A4_RAT;LIPA4_RAT	1	NaN	NaN
PD7 / VD7	D3ZUB0	D3ZUB0	-0.231597	0.231597	0.00445219	0.0465474	76	D3ZUB0	Rcn1	Reticulocalbin 1	D3ZUB0_RAT	14	-14.8308	0.851692
PD7 / VD7	F1M7S4;P21961	F1M7S4;P21961	-0.662502	0.662502	0.00449896	0.0468354	12	F1M7S4;P21961	Cpa3	Mast cell carboxypeptidase A;Mast cell carboxypeptidase A (Fragment)	F1M7S4_RAT;CBPA3_RAT	3	-36.8218	0.631782
PD7 / VD7	A0A0G2KAJ7	A0A0G2KAJ7	0.124277	0.124277	0.0045357	0.0470169	280	A0A0G2KAJ7	Col12a1	Collagen alpha-1(XII) chain	A0A0G2KAJ7_RAT	60	8.99612	1.08996
PD7 / VD7	A0A0G2K757;P25235	A0A0G2K757;P25235	0.112508	0.112508	0.00462888	0.0473978	112	A0A0G2K757;P25235	Rpn2	Dolichyl-diphosphooligosaccharide--protein glycosyltransferase subunit 2	A0A0G2K757_RAT;RPN2_RAT	22	8.11062	1.08111
PD7 / VD7	Q64560	Q64560	0.206726	0.206726	0.00463082	0.0473978	228	Q64560	Tpp2	Tripeptidyl-peptidase 2	TPP2_RAT	41	15.4066	1.15407
PD7 / VD7	O88267	O88267	-0.0619902	0.0619902	0.00461979	0.0473978	60	O88267	Acot1	Acyl-coenzyme A thioesterase 1	ACOT1_RAT	12	-4.20583	0.957942
PD7 / VD7	P15999	P15999	0.0990932	0.0990932	0.00470739	0.04778	212	P15999	Atp5f1a	ATP synthase subunit alpha, mitochondrial	ATPA_RAT	30	7.11	1.0711
PD7 / VD7	B2RYD7	B2RYD7	-0.233731	0.233731	0.00469008	0.04778	36	B2RYD7	Stt3b	RCG25591, isoform CRA_a	B2RYD7_RAT	9	-14.9568	0.850432
PD7 / VD7	Q5I0E7	Q5I0E7	-0.146228	0.146228	0.00472917	0.0478019	32	Q5I0E7	Tmed9	Transmembrane emp24 domain-containing protein 9	TMED9_RAT	6	-9.63898	0.90361
PD7 / VD7	Q920L2	Q920L2	0.100511	0.100511	0.00491636	0.0494886	112	Q920L2	Sdha	Succinate dehydrogenase [ubiquinone] flavoprotein subunit, mitochondrial	SDHA_RAT	20	7.21533	1.07215
PD7 / VD7	O35394	O35394	NaN	NaN	0.0109082	0.0767986	4	O35394	Rabac1	Prenylated Rab acceptor protein 1	PRAF1_RAT	1	NaN	NaN
PD7 / VD7	A0A0G2JXA8;Q5XIW9;Q9Z2S9	A0A0G2JXA8;Q5XIW9;Q9Z2S9	0.0627168	0.0627168	0.00502478	0.0497576	80	A0A0G2JXA8;Q5XIW9;Q9Z2S9	Flot2	Flotillin 2, isoform CRA_d;Flot2 protein;Flotillin-2	A0A0G2JXA8_RAT;Q5XIW9_RAT;FLOT2_RAT	16	4.44307	1.04443
PD7 / VD7	Q68FS2	Q68FS2	0.0256625	0.0256625	0.00500858	0.0497576	96	Q68FS2	Cops4	COP9 signalosome complex subunit 4	CSN4_RAT	17	1.7947	1.01795
PD7 / VD7	M0RCA6	M0RCA6	0.20246	0.20246	0.00501052	0.0497576	152	M0RCA6	Avil	Advillin	M0RCA6_RAT	28	15.0658	1.15066
PD7 / VD7	B2GV73	B2GV73	-0.581628	0.581628	0.00499267	0.0497576	24	B2GV73	Arpc3	Actin-related protein 2/3 complex subunit 3	B2GV73_RAT	4	-33.1791	0.668209
PD7 / VD7	A0A0G2K6P4;D3ZCR3;P63159	A0A0G2K6P4;D3ZCR3;P63159	0.0159466	0.0159466	0.00528888	0.0521495	84	A0A0G2K6P4;D3ZCR3;P63159	Hmg1l1;LOC108349189;Hmgb1	High-mobility group (nonhistone chromosomal) protein 1-like 1;High mobility group protein B1 pseudogene;High mobility group protein B1	A0A0G2K6P4_RAT;D3ZCR3_RAT;HMGB1_RAT	9	1.11147	1.01111
PD7 / VD7	A0A0G2JZC3;M0R776	A0A0G2JZC3;M0R776	-0.395053	0.395053	0.00556523	0.0538599	20	A0A0G2JZC3;M0R776	Mrps36	Mitochondrial ribosomal protein S36	A0A0G2JZC3_RAT;M0R776_RAT	3	-23.9539	0.760461
PD7 / VD7	P50411	P50411	-0.380831	0.380831	0.00554286	0.0538599	20	P50411	Ppp1r2	Protein phosphatase inhibitor 2	IPP2_RAT	4	-23.2005	0.767995
PD7 / VD7	Q3KRC3	Q3KRC3	-0.304288	0.304288	0.00575859	0.0553609	60	Q3KRC3	Srpra	SRP receptor subunit alpha	Q3KRC3_RAT	13	-19.0158	0.809842
PD7 / VD7	Q5XIE1	Q5XIE1	-0.16741	0.16741	0.00579969	0.0553609	72	Q5XIE1	Them6	Protein THEM6	THEM6_RAT	12	-10.956	0.89044
PD7 / VD7	A0JPM9	A0JPM9	-0.171658	0.171658	0.00581789	0.0553609	40	A0JPM9	Eif3j	Eukaryotic translation initiation factor 3 subunit J	EIF3J_RAT	8	-11.2178	0.887822
PD7 / VD7	P04916	P04916	-0.628105	0.628105	0.00578654	0.0553609	20	P04916	Rbp4	Retinol-binding protein 4	RET4_RAT	5	-35.2974	0.647026
PD7 / VD7	P62275	P62275	1.30994	1.30994	0.00591506	0.0560665	16	P62275	Rps29	40S ribosomal protein S29	RS29_RAT	2	147.931	2.47931
PD7 / VD7	B4F7F3	B4F7F3	-0.114226	0.114226	0.00596102	0.0562831	44	B4F7F3	Arvcf	ARVCF, delta catenin family member	B4F7F3_RAT	11	-7.61224	0.923878
PD7 / VD7	D3ZG43	D3ZG43	-0.111762	0.111762	0.00617205	0.0578274	52	D3ZG43	Ndufs3	NADH dehydrogenase (Ubiquinone) Fe-S protein 3 (Predicted), isoform CRA_c	D3ZG43_RAT	11	-7.45426	0.925457
PD7 / VD7	M0RCY2;P62278	M0RCY2;P62278	-0.0585244	0.0585244	0.00621218	0.0579804	60	M0RCY2;P62278	;Rps13	Uncharacterized protein;40S ribosomal protein S13	M0RCY2_RAT;RS13_RAT	11	-3.97542	0.960246
PD7 / VD7	B1WC34	B1WC34	0.124558	0.124558	0.0062556	0.0580466	88	B1WC34	Prkcsh	Protein kinase C substrate 80K-H	B1WC34_RAT	17	9.01739	1.09017
PD7 / VD7	F1M9X5;P81377	F1M9X5;P81377	0.561538	0.561538	0.00626694	0.0580466	20	F1M9X5;P81377	Prkar1b	cAMP-dependent protein kinase type I-beta regulatory subunit	F1M9X5_RAT;KAP1_RAT	4	47.5842	1.47584
PD7 / VD7	P63047	P63047	-0.416959	0.416959	0.00651402	0.0594956	28	P63047	Sult4a1	Sulfotransferase 4A1	ST4A1_RAT	6	-25.0998	0.749002
PD7 / VD7	P47853	P47853	-0.0903863	0.0903863	0.00654549	0.0594956	80	P47853	Bgn	Biglycan	PGS1_RAT	13	-6.07288	0.939271
PD7 / VD7	A0A0G2K9E0;E2RUH2	A0A0G2K9E0;E2RUH2	-0.0103988	0.0103988	0.00654433	0.0594956	96	A0A0G2K9E0;E2RUH2	Rnh1	Ribonuclease inhibitor	A0A0G2K9E0_RAT;E2RUH2_RAT	18	-0.718201	0.992818
PD7 / VD7	Q6AXR6;Q9Z339	Q6AXR6;Q9Z339	-0.47149	0.47149	0.00650148	0.0594956	36	Q6AXR6;Q9Z339	Gsto1	Glutathione S-transferase omega 1, isoform CRA_b;Glutathione S-transferase omega-1	Q6AXR6_RAT;GSTO1_RAT	8	-27.8781	0.721219
PD7 / VD7	P01041	P01041	-0.0932142	0.0932142	0.00647343	0.0594956	40	P01041	Cstb	Cystatin-B	CYTB_RAT	6	-6.25681	0.937432
PD7 / VD7	Q9JKB7	Q9JKB7	0.222057	0.222057	0.0066363	0.0598741	148	Q9JKB7	Gda	Guanine deaminase	Q9JKB7_RAT	26	16.6395	1.1664
PD7 / VD7	D3ZF13	D3ZF13	-0.927102	0.927102	0.00674614	0.0601964	8	D3ZF13	Ndufab1	Acyl carrier protein	D3ZF13_RAT	2	-47.4086	0.525914
PD7 / VD7	Q4FZT9	Q4FZT9	0.102286	0.102286	0.00674529	0.0601964	128	Q4FZT9	Psmd2	26S proteasome non-ATPase regulatory subunit 2	PSMD2_RAT	25	7.34728	1.07347
PD7 / VD7	Q5XIJ7	Q5XIJ7	-0.651015	0.651015	0.00678576	0.0603288	40	Q5XIJ7	Cab39l	Calcium-binding protein 39-like	Q5XIJ7_RAT	9	-36.3168	0.636832
PD7 / VD7	P60123	P60123	0.0765184	0.0765184	0.00684595	0.0603515	68	P60123	Ruvbl1	RuvB-like 1	RUVB1_RAT	14	5.44702	1.05447
PD7 / VD7	Q04462	Q04462	0.321254	0.321254	0.00683219	0.0603515	248	Q04462	Vars	Valine--tRNA ligase	SYVC_RAT	45	24.9416	1.24942
PD7 / VD7	A0A0G2K484;F1LMU0	A0A0G2K484;F1LMU0	2.03076	2.03076	0.00691218	0.0603515	224	A0A0G2K484;F1LMU0	Myh1;Myh4	Myosin-4	A0A0G2K484_RAT;F1LMU0_RAT	36	308.62	4.0862
PD7 / VD7	Q99068	Q99068	-0.138479	0.138479	0.00689913	0.0603515	36	Q99068	Lrpap1	Alpha-2-macroglobulin receptor-associated protein	AMRP_RAT	7	-9.15233	0.908477
PD7 / VD7	G3V7V3	G3V7V3	-0.652703	0.652703	0.00696742	0.0606165	44	G3V7V3	Slc27a4	Solute carrier family 27 (Fatty acid transporter), member 4	G3V7V3_RAT	9	-36.3913	0.636087
PD7 / VD7	G3V9T7	G3V9T7	-0.323136	0.323136	0.00707087	0.0607446	52	G3V9T7	Asna1	ATPase Asna1	G3V9T7_RAT	10	-20.0669	0.799331
PD7 / VD7	D4AEH3	D4AEH3	-0.290992	0.290992	0.00711733	0.0607446	48	D4AEH3	Psmd7	Proteasome (Prosome, macropain) 26S subunit, non-ATPase, 7 (Predicted)	D4AEH3_RAT	9	-18.266	0.81734
PD7 / VD7	G3V8Q1	G3V8Q1	-0.414329	0.414329	0.00703213	0.0607446	56	G3V8Q1	Cope	Coatomer subunit epsilon	G3V8Q1_RAT	12	-24.9631	0.750369
PD7 / VD7	B2RYS8	B2RYS8	-0.353836	0.353836	0.00715207	0.0607446	20	B2RYS8	Ndufb8	NADH dehydrogenase [ubiquinone] 1 beta subcomplex subunit 8, mitochondrial	B2RYS8_RAT	5	-21.7499	0.782501
PD7 / VD7	A0A0H2UHD9;Q5XIA1	A0A0H2UHD9;Q5XIA1	0.294769	0.294769	0.007215	0.0610269	44	A0A0H2UHD9;Q5XIA1	Ncln	Nicalin	A0A0H2UHD9_RAT;NCLN_RAT	8	22.6688	1.22669
PD7 / VD7	Q5I0D1	Q5I0D1	0.21819	0.21819	0.00730376	0.0615639	88	Q5I0D1	Glod4	Glyoxalase domain-containing protein 4	GLOD4_RAT	16	16.3273	1.16327
PD7 / VD7	P62997	P62997	-0.277973	0.277973	0.00735534	0.0615726	20	P62997	Tra2b	Transformer-2 protein homolog beta	TRA2B_RAT	5	-17.5251	0.824749
PD7 / VD7	F1LSS1;Q9Z1M9	F1LSS1;Q9Z1M9	0.568105	0.568105	0.00734496	0.0615726	28	F1LSS1;Q9Z1M9	Smc1a	Structural maintenance of chromosomes protein;Structural maintenance of chromosomes protein 1A	F1LSS1_RAT;SMC1A_RAT	6	48.2575	1.48257
PD7 / VD7	Q27W01	Q27W01	0.33917	0.33917	0.00748222	0.0624201	16	Q27W01	Rbm8a	RNA-binding protein 8A	RBM8A_RAT	2	26.5028	1.26503
PD7 / VD7	P30713	P30713	-0.221023	0.221023	0.00752014	0.0625224	36	P30713	Gstt2	Glutathione S-transferase theta-2	GSTT2_RAT	7	-14.2043	0.857957
PD7 / VD7	B2RYS2	B2RYS2	-0.263932	0.263932	0.00761215	0.0630721	28	B2RYS2	Uqcrb	Cytochrome b-c1 complex subunit 7	B2RYS2_RAT	5	-16.7185	0.832815
PD7 / VD7	A0A0G2K014;Q5XI38	A0A0G2K014;Q5XI38	0.118972	0.118972	0.00778219	0.0638297	128	A0A0G2K014;Q5XI38	Lcp1	Lymphocyte cytosolic protein 1	A0A0G2K014_RAT;Q5XI38_RAT	24	8.59605	1.08596
PD7 / VD7	P62744	P62744	-0.487919	0.487919	0.00775731	0.0638297	24	P62744	Ap2s1	AP-2 complex subunit sigma	AP2S1_RAT	5	-28.6947	0.713053
PD7 / VD7	O35987	O35987	0.0407052	0.0407052	0.00781609	0.0638926	80	O35987	Nsfl1c	NSFL1 cofactor p47	NSF1C_RAT	15	2.86165	1.02862
PD7 / VD7	A0A0G2K0J3;A0A0G2K1Q7;A0A0G2K1R9;A0A0G2K2B9;O70511	A0A0G2K0J3;A0A0G2K1Q7;A0A0G2K1R9;A0A0G2K2B9;O70511	0.23326	0.23326	0.00786542	0.0640808	120	A0A0G2K0J3;A0A0G2K1Q7;A0A0G2K1R9;A0A0G2K2B9;O70511	Ank3	Ankyrin-3	A0A0G2K0J3_RAT;A0A0G2K1Q7_RAT;A0A0G2K1R9_RAT;A0A0G2K2B9_RAT;ANK3_RAT	27	17.5489	1.17549
PD7 / VD7	G3V7L6	G3V7L6	0.126441	0.126441	0.00818563	0.0662465	92	G3V7L6	Psmc2	26S proteasome regulatory subunit 7	G3V7L6_RAT	20	9.15976	1.0916
PD7 / VD7	G3V7I0;Q9Z0V6	G3V7I0;Q9Z0V6	-0.158108	0.158108	0.00830953	0.0668556	52	G3V7I0;Q9Z0V6	Prdx3	Peroxiredoxin 3;Thioredoxin-dependent peroxide reductase, mitochondrial	G3V7I0_RAT;PRDX3_RAT	8	-10.38	0.8962
PD7 / VD7	D3ZS52	D3ZS52	NaN	NaN	0.0149526	0.0919814	8	D3ZS52	Tmem258b	Transmembrane protein 258 B	D3ZS52_RAT	1	NaN	NaN
PD7 / VD7	A0A0G2JWK7;P31232	A0A0G2JWK7;P31232	-0.203448	0.203448	0.00831579	0.0668556	56	A0A0G2JWK7;P31232	Tagln	Transgelin	A0A0G2JWK7_RAT;TAGL_RAT	11	-13.1527	0.868473
PD7 / VD7	B1WC61	B1WC61	0.146557	0.146557	0.00842087	0.0674778	96	B1WC61	Acad9	Acad9 protein	B1WC61_RAT	18	10.6925	1.10692
PD7 / VD7	G3V9D3	G3V9D3	-0.223167	0.223167	0.00845968	0.0675665	72	G3V9D3	Sel1l	Protein sel-1 homolog 1	G3V9D3_RAT	13	-14.3317	0.856683
PD7 / VD7	Q5XIH3	Q5XIH3	0.038798	0.038798	0.0084918	0.0676014	108	Q5XIH3	Ndufv1	NADH dehydrogenase [ubiquinone] flavoprotein 1, mitochondrial	Q5XIH3_RAT	20	2.72576	1.02726
PD7 / VD7	D3ZZT9	D3ZZT9	0.27032	0.27032	0.00862071	0.067998	292	D3ZZT9	Col14a1	Collagen type XIV alpha 1 chain	D3ZZT9_RAT	54	20.6075	1.20608
PD7 / VD7	Q68FY0	Q68FY0	0.281698	0.281698	0.00864188	0.067998	100	Q68FY0	Uqcrc1	Cytochrome b-c1 complex subunit 1, mitochondrial	QCR1_RAT	17	21.5624	1.21562
PD7 / VD7	Q5U302	Q5U302	0.200772	0.200772	0.0087091	0.067998	152	Q5U302	Ctnna1	Catenin (Cadherin associated protein), alpha 1	Q5U302_RAT	30	14.9313	1.14931
PD7 / VD7	A0JPJ7	A0JPJ7	0.100264	0.100264	0.0088243	0.0680253	76	A0JPJ7	Ola1	Obg-like ATPase 1	OLA1_RAT	14	7.19696	1.07197
PD7 / VD7	P55053	P55053	-0.0258321	0.0258321	0.00880059	0.0680253	64	P55053	Fabp5	Fatty acid-binding protein 5	FABP5_RAT	9	-1.77461	0.982254
PD7 / VD7	G3V7G9	G3V7G9	-0.293708	0.293708	0.00894184	0.068714	56	G3V7G9	Eif3l	Eukaryotic translation initiation factor 3, subunit 6 interacting protein	G3V7G9_RAT	11	-18.4198	0.815802
PD7 / VD7	F1M9N7;Q4KLH5	F1M9N7;Q4KLH5	-0.361734	0.361734	0.00903695	0.0692265	40	F1M9N7;Q4KLH5	Agfg1	Arf-GAP domain and FG repeat-containing protein 1	F1M9N7_RAT;AGFG1_RAT	7	-22.1772	0.778228
PD7 / VD7	Q6PST4	Q6PST4	-0.152759	0.152759	0.00908821	0.0694009	84	Q6PST4	Atl1	Atlastin-1	ATLA1_RAT	16	-10.0472	0.899528
PD7 / VD7	O08629	O08629	-0.0187472	0.0187472	0.00919831	0.069804	56	O08629	Trim28	Transcription intermediary factor 1-beta	TIF1B_RAT	13	-1.29105	0.987089
PD7 / VD7	A0A0G2JXA1;F1LP59	A0A0G2JXA1;F1LP59	-0.360154	0.360154	0.00919568	0.069804	16	A0A0G2JXA1;F1LP59	Rab3gap1	Rab3 GTPase-activating protein catalytic subunit	A0A0G2JXA1_RAT;F1LP59_RAT	4	-22.0919	0.779081
PD7 / VD7	D3ZN79;P17078	D3ZN79;P17078	-0.298549	0.298549	0.00925063	0.069983	12	D3ZN79;P17078	;Rpl35	Uncharacterized protein;60S ribosomal protein L35	D3ZN79_RAT;RL35_RAT	2	-18.693	0.81307
PD7 / VD7	A0A0G2JYA2;Q9JHU5	A0A0G2JYA2;Q9JHU5	-0.472941	0.472941	0.00929857	0.0701279	28	A0A0G2JYA2;Q9JHU5	Arfip1	ADP-ribosylation factor interacting protein 1, isoform CRA_b;Arfaptin-1	A0A0G2JYA2_RAT;ARFP1_RAT	7	-27.9505	0.720495
PD7 / VD7	O08651	O08651	-0.038693	0.038693	0.00933672	0.0701983	104	O08651	Phgdh	D-3-phosphoglycerate dehydrogenase	SERA_RAT	19	-2.64635	0.973536
PD7 / VD7	P97536	P97536	0.216864	0.216864	0.00945317	0.0707963	148	P97536	Cand1	Cullin-associated NEDD8-dissociated protein 1	CAND1_RAT	31	16.2204	1.1622
PD7 / VD7	P62944	P62944	0.0868045	0.0868045	0.00947439	0.0707963	124	P62944	Ap2b1	AP-2 complex subunit beta	AP2B1_RAT	24	6.20153	1.06202
PD7 / VD7	P70566	P70566	-0.167677	0.167677	0.00960733	0.0715702	64	P70566	Tmod2	Tropomodulin-2	TMOD2_RAT	11	-10.9725	0.890275
PD7 / VD7	Q6IN37	Q6IN37	-0.157407	0.157407	0.00966813	0.0718035	12	Q6IN37	Gm2a	GM2 ganglioside activator	Q6IN37_RAT	2	-10.3365	0.896635
PD7 / VD7	D3ZUC9	D3ZUC9	-0.105594	0.105594	0.00970297	0.0718433	44	D3ZUC9	Oxsr1	Oxidative stress-responsive kinase 1	D3ZUC9_RAT	9	-7.05781	0.929422
PD7 / VD7	F8WG91;P37996	F8WG91;P37996	-0.243142	0.243142	0.00988253	0.072951	36	F8WG91;P37996	Arl3	ADP-ribosylation factor-like protein 3	F8WG91_RAT;ARL3_RAT	9	-15.5097	0.844903
PD7 / VD7	A0A0U1RS25;F1LY19	A0A0U1RS25;F1LY19	0.0206176	0.0206176	0.010273	0.0747739	148	A0A0U1RS25;F1LY19	Upf1	UPF1, RNA helicase and ATPase;RCG38820	A0A0U1RS25_RAT;F1LY19_RAT	26	1.43937	1.01439
PD7 / VD7	D3ZYJ5	D3ZYJ5	-0.612643	0.612643	0.0102633	0.0747739	8	D3ZYJ5	Gramd1b	GRAM domain-containing 1B	D3ZYJ5_RAT	2	-34.6003	0.653997
PD7 / VD7	D3ZWS0	D3ZWS0	-0.782696	0.782696	0.0104837	0.0760067	40	D3ZWS0	Scrib	Scribble planar cell polarity protein	D3ZWS0_RAT	10	-41.872	0.58128
PD7 / VD7	A0A0G2K1U9	A0A0G2K1U9	-0.198429	0.198429	0.0105525	0.0760416	36	A0A0G2K1U9	Irgq	Immunity-related GTPase Q	A0A0G2K1U9_RAT	7	-12.8501	0.871499
PD7 / VD7	Q4KLZ3	Q4KLZ3	-0.313497	0.313497	0.0105544	0.0760416	32	Q4KLZ3	Dazap1	DAZ associated protein 1, isoform CRA_a	Q4KLZ3_RAT	7	-19.5311	0.804689
PD7 / VD7	D3ZU13;D4AD15	D3ZU13;D4AD15	0.173469	0.173469	0.0108664	0.0767265	116	D3ZU13;D4AD15	Eif4g1	Eukaryotic translation initiation factor 4 gamma, 1;Eukaryotic translation initiation factor 4 gamma, 1	D3ZU13_RAT;D4AD15_RAT	24	12.7767	1.12777
PD7 / VD7	G3V824	G3V824	0.545529	0.545529	0.0108663	0.0767265	12	G3V824	Igf2r	Insulin-like growth factor 2 receptor	G3V824_RAT	3	45.9555	1.45956
PD7 / VD7	P04218	P04218	0.466649	0.466649	0.0108094	0.0767265	16	P04218	Cd200	OX-2 membrane glycoprotein	OX2G_RAT	3	38.1896	1.3819
PD7 / VD7	A0A0G2K9P4	A0A0G2K9P4	0.0658776	0.0658776	0.010861	0.0767265	52	A0A0G2K9P4	Sh3glb2	Endophilin-B2	A0A0G2K9P4_RAT	10	4.67215	1.04672
PD7 / VD7	F1LXS3	F1LXS3	-0.0798592	0.0798592	0.0107863	0.0767265	28	F1LXS3	Matn2	Matrilin 2	F1LXS3_RAT	6	-5.385	0.94615
PD7 / VD7	A0A0G2JW90;F7FKI5;P26284	A0A0G2JW90;F7FKI5;P26284	-0.0795278	0.0795278	0.0110682	0.0771759	84	A0A0G2JW90;F7FKI5;P26284	Pdha1	Pyruvate dehydrogenase E1 component subunit alpha;Pyruvate dehydrogenase E1 component subunit alpha;Pyruvate dehydrogenase E1 component subunit alpha, somatic form, mitochondrial	A0A0G2JW90_RAT;F7FKI5_RAT;ODPA_RAT	15	-5.36326	0.946367
PD7 / VD7	D4AEH9	D4AEH9	0.130534	0.130534	0.0110403	0.0771759	136	D4AEH9	Agl	Amylo-1, 6-glucosidase, 4-alpha-glucanotransferase (Glycogen debranching enzyme, glycogen storage disease type III) (Predicted), isoform CRA_a	D4AEH9_RAT	31	9.46987	1.0947
PD7 / VD7	A0A0G2JSY2;D3ZL24;F1LPH1;P27321	A0A0G2JSY2;D3ZL24;F1LPH1;P27321	-0.209591	0.209591	0.0110885	0.0771759	60	A0A0G2JSY2;D3ZL24;F1LPH1;P27321	Cast	Calpastatin	A0A0G2JSY2_RAT;D3ZL24_RAT;F1LPH1_RAT;ICAL_RAT	11	-13.5218	0.864782
PD7 / VD7	Q63910	Q63910	-0.187025	0.187025	0.0110188	0.0771759	48	Q63910	Hba-a3	Alpha globin	Q63910_RAT	7	-12.1585	0.878415
PD7 / VD7	Q3MHT2;Q99P39	Q3MHT2;Q99P39	0.589557	0.589557	0.0111381	0.0773003	28	Q3MHT2;Q99P39	Nfs1	Cysteine desulfurase, mitochondrial;Cysteine desulfurase, mitochondrial	Q3MHT2_RAT;NFS1_RAT	6	50.4785	1.50478
PD7 / VD7	P38718	P38718	-0.492179	0.492179	0.011463	0.0791046	24	P38718	Mpc2	Mitochondrial pyruvate carrier 2	MPC2_RAT	6	-28.905	0.71095
PD7 / VD7	Q6PCT3	Q6PCT3	-0.510201	0.510201	0.0118887	0.0814957	24	Q6PCT3	Tpd52l2	Tumor protein D54	TPD54_RAT	6	-29.7875	0.702125
PD7 / VD7	Q02769	Q02769	-0.162362	0.162362	0.0119099	0.0814957	48	Q02769	Fdft1	Squalene synthase	FDFT_RAT	11	-10.6439	0.893561
PD7 / VD7	A0A0G2JVW5	A0A0G2JVW5	0.00173645	0.00173645	0.0121535	0.0823785	76	A0A0G2JVW5	Huwe1	E3 ubiquitin-protein ligase HUWE1	A0A0G2JVW5_RAT	18	0.120434	1.0012
PD7 / VD7	P08289	P08289	0.157147	0.157147	0.0121211	0.0823785	48	P08289	Alpl	Alkaline phosphatase, tissue-nonspecific isozyme	PPBT_RAT	9	11.5079	1.11508
PD7 / VD7	Q4KM45	Q4KM45	NaN	NaN	0.0181239	0.100569	4	Q4KM45	NaN	UPF0687 protein C20orf27 homolog	CT027_RAT	1	NaN	NaN
PD7 / VD7	A0A0G2K1M8;O70196	A0A0G2K1M8;O70196	-0.0310495	0.0310495	0.0121742	0.0823785	88	A0A0G2K1M8;O70196	Prep	Prolyl endopeptidase	A0A0G2K1M8_RAT;PPCE_RAT	19	-2.1292	0.978708
PD7 / VD7	Q9QVC8	Q9QVC8	0.103605	0.103605	0.0122172	0.0824409	124	Q9QVC8	Fkbp4	Peptidyl-prolyl cis-trans isomerase FKBP4	FKBP4_RAT	20	7.44551	1.07446
PD7 / VD7	G3V7P8;Q9Z2L9	G3V7P8;Q9Z2L9	-0.0731844	0.0731844	0.0122579	0.0824872	48	G3V7P8;Q9Z2L9	Ndrg4	N-myc downstream regulated gene 4, isoform CRA_c;Protein NDRG4	G3V7P8_RAT;NDRG4_RAT	10	-4.94624	0.950538
PD7 / VD7	Q5I0M2	Q5I0M2	-0.267924	0.267924	0.0123133	0.0826317	32	Q5I0M2	Qprt	Nicotinate-nucleotide pyrophosphorylase [carboxylating]	NADC_RAT	6	-16.9486	0.830514
PD7 / VD7	P02680	P02680	1.06252	1.06252	0.0124076	0.0828653	164	P02680	Fgg	Fibrinogen gamma chain	FIBG_RAT	22	108.858	2.08858
PD7 / VD7	B0BNB0	B0BNB0	-0.494583	0.494583	0.0124164	0.0828653	8	B0BNB0	Golt1b	Golgi transport 1B	B0BNB0_RAT	2	-29.0233	0.709767
PD7 / VD7	P97534	P97534	0.329332	0.329332	0.0124502	0.0828653	8	P97534	Fkbp1b	Peptidyl-prolyl cis-trans isomerase FKBP1B	FKB1B_RAT	2	25.6431	1.25643
PD7 / VD7	A0A0G2JSW0;P18666	A0A0G2JSW0;P18666	0.00311604	0.00311604	0.0124883	0.0828926	68	A0A0G2JSW0;P18666	Myl12b	Myosin regulatory light chain 12B	A0A0G2JSW0_RAT;ML12B_RAT	11	0.216221	1.00216
PD7 / VD7	G3V734;Q64591	G3V734;Q64591	-0.191145	0.191145	0.0125287	0.0829349	28	G3V734;Q64591	Decr1	2,4-dienoyl CoA reductase 1, mitochondrial, isoform CRA_a;2,4-dienoyl-CoA reductase, mitochondrial	G3V734_RAT;DECR_RAT	7	-12.409	0.87591
PD7 / VD7	P54690;Q99JD5	P54690;Q99JD5	-0.183489	0.183489	0.0126794	0.0837046	52	P54690;Q99JD5	Bcat1	Branched-chain-amino-acid aminotransferase, cytosolic;Branched-chain-amino-acid aminotransferase	BCAT1_RAT;Q99JD5_RAT	9	-11.9429	0.880571
PD7 / VD7	A0A0G2JXB1;A0A0G2JXN6;P08699	A0A0G2JXB1;A0A0G2JXN6;P08699	-0.414581	0.414581	0.0129479	0.0852461	52	A0A0G2JXB1;A0A0G2JXN6;P08699	Lgals3	Galectin;Galectin;Galectin-3	A0A0G2JXB1_RAT;A0A0G2JXN6_RAT;LEG3_RAT	7	-24.9763	0.750237
PD7 / VD7	Q63413	Q63413	-0.000511882	0.000511882	0.013136	0.0861281	96	Q63413	Ddx39b	Spliceosome RNA helicase Ddx39b	DX39B_RAT	18	-0.0354746	0.999645
PD7 / VD7	Q499N5	Q499N5	0.0266436	0.0266436	0.0131526	0.0861281	72	Q499N5	Acsf2	Acyl-CoA synthetase family member 2, mitochondrial	ACSF2_RAT	16	1.86395	1.01864
PD7 / VD7	A0A0G2JWD2;Q5XI81	A0A0G2JWD2;Q5XI81	0.141614	0.141614	0.0132653	0.0866334	100	A0A0G2JWD2;Q5XI81	Fxr1	Fragile X mental retardation syndrome-related protein 1	A0A0G2JWD2_RAT;FXR1_RAT	20	10.3139	1.10314
PD7 / VD7	Q9Z1H9	Q9Z1H9	0.0225485	0.0225485	0.013413	0.0867313	32	Q9Z1H9	Cavin3	Caveolae-associated protein 3	CAVN3_RAT	6	1.57522	1.01575
PD7 / VD7	Q68FS8	Q68FS8	-0.264285	0.264285	0.0134098	0.0867313	60	Q68FS8	Rtca	RNA 3'-terminal phosphate cyclase	Q68FS8_RAT	12	-16.7389	0.832611
PD7 / VD7	F1LNF7;Q99NA5	F1LNF7;Q99NA5	-0.042544	0.042544	0.0134905	0.0869388	76	F1LNF7;Q99NA5	Idh3a	Isocitrate dehydrogenase [NAD] subunit, mitochondrial;Isocitrate dehydrogenase [NAD] subunit alpha, mitochondrial	F1LNF7_RAT;IDH3A_RAT	12	-2.90587	0.970941
PD7 / VD7	Q63362	Q63362	-0.49422	0.49422	0.0136052	0.0874469	28	Q63362	Ndufa5	NADH dehydrogenase [ubiquinone] 1 alpha subcomplex subunit 5	NDUA5_RAT	5	-29.0054	0.709946
PD7 / VD7	B5DEN5	B5DEN5	-0.191293	0.191293	0.0137757	0.0880414	52	B5DEN5	Eef1b2	Eukaryotic translation elongation factor 1 beta 2	B5DEN5_RAT	8	-12.4179	0.875821
PD7 / VD7	Q4KM73	Q4KM73	-0.509483	0.509483	0.0138062	0.0880414	44	Q4KM73	Cmpk1	UMP-CMP kinase	KCY_RAT	8	-29.7526	0.702474
PD7 / VD7	Q5M8C7;Q8K581	Q5M8C7;Q8K581	-0.739755	0.739755	0.0137897	0.0880414	8	Q5M8C7;Q8K581	Txndc9	Thioredoxin domain containing 9;Thioredoxin domain-containing protein 9	Q5M8C7_RAT;TXND9_RAT	2	-40.1159	0.598841
PD7 / VD7	Q91XU1	Q91XU1	-0.551637	0.551637	0.0139265	0.0885766	24	Q91XU1	Qki	Protein quaking	QKI_RAT	6	-31.7754	0.682246
PD7 / VD7	Q6P792;Q9WUH4	Q6P792;Q9WUH4	0.152242	0.152242	0.0140019	0.0888245	64	Q6P792;Q9WUH4	Fhl1	Four and a half LIM domains 1;Four and a half LIM domains protein 1	Q6P792_RAT;FHL1_RAT	11	11.1295	1.1113
PD7 / VD7	D3ZQI1	D3ZQI1	-0.575324	0.575324	0.014077	0.0890691	20	D3ZQI1	Gpx7	Glutathione peroxidase	D3ZQI1_RAT	4	-32.8864	0.671136
PD7 / VD7	D3ZC56	D3ZC56	0.224363	0.224363	0.0142593	0.0897564	352	D3ZC56	Dst	Dystonin	D3ZC56_RAT	80	16.8261	1.16826
PD7 / VD7	A0A0G2K719	A0A0G2K719	-0.0840454	0.0840454	0.0142352	0.0897564	142	A0A0G2K719	Ddx3x	DEAD-box helicase 3, X-linked	A0A0G2K719_RAT	24	-5.65915	0.943409
PD7 / VD7	Q5XFX0	Q5XFX0	-0.229819	0.229819	0.014489	0.0909668	44	Q5XFX0	Tagln2	Transgelin-2	TAGL2_RAT	9	-14.7258	0.852742
PD7 / VD7	A0A0G2JZH8	A0A0G2JZH8	-0.269097	0.269097	0.0146189	0.0915468	36	A0A0G2JZH8	Pdhx	Dihydrolipoamide acetyltransferase component of pyruvate dehydrogenase complex	A0A0G2JZH8_RAT	8	-17.0161	0.829839
PD7 / VD7	A0A0G2K2M8;D3ZM62;D3ZQG6	A0A0G2K2M8;D3ZM62;D3ZQG6	-0.121527	0.121527	0.0146802	0.0915522	68	A0A0G2K2M8;D3ZM62;D3ZQG6	Trim2	Tripartite motif-containing protein 2	A0A0G2K2M8_RAT;D3ZM62_RAT;TRIM2_RAT	14	-8.0786	0.919214
PD7 / VD7	B2GUZ9	B2GUZ9	-0.288907	0.288907	0.014695	0.0915522	28	B2GUZ9	Fam49b	Fam49b protein	B2GUZ9_RAT	7	-18.1478	0.818522
PD7 / VD7	Q6IRE4	Q6IRE4	-0.280745	0.280745	0.0149128	0.0919814	24	Q6IRE4	Tsg101	Tumor susceptibility gene 101 protein	TS101_RAT	5	-17.6834	0.823166
PD7 / VD7	P52944	P52944	-0.166834	0.166834	0.0149156	0.0919814	40	P52944	Pdlim1	PDZ and LIM domain protein 1	PDLI1_RAT	8	-10.9204	0.890796
PD7 / VD7	D4A7I6	D4A7I6	-0.553868	0.553868	0.0151715	0.0930929	40	D4A7I6	Washc4	WASH complex subunit 4	D4A7I6_RAT	10	-31.8809	0.681191
PD7 / VD7	P04797	P04797	-0.00780565	0.00780565	0.0152251	0.0931866	161	P04797	Gapdh	Glyceraldehyde-3-phosphate dehydrogenase	G3P_RAT	17	-0.539586	0.994604
PD7 / VD7	P47727	P47727	0.0245816	0.0245816	0.0154089	0.0938234	92	P47727	Cbr1	Carbonyl reductase [NADPH] 1	CBR1_RAT	17	1.71846	1.01718
PD7 / VD7	Q9JHL4	Q9JHL4	0.136328	0.136328	0.0154137	0.0938234	68	Q9JHL4	Dbnl	Drebrin-like protein	DBNL_RAT	13	9.91042	1.0991
PD7 / VD7	Q5NDF0	Q5NDF0	-0.0519881	0.0519881	0.0154447	0.0938234	32	Q5NDF0	Pomgnt2	Protein O-linked-mannose beta-1,4-N-acetylglucosaminyltransferase 2	PMGT2_RAT	8	-3.53939	0.964606
PD7 / VD7	P50554	P50554	0.233471	0.233471	0.015643	0.0940945	136	P50554	Abat	4-aminobutyrate aminotransferase, mitochondrial	GABT_RAT	23	17.566	1.17566
PD7 / VD7	Q7M0E3	Q7M0E3	-0.0747438	0.0747438	0.0155333	0.0940945	64	Q7M0E3	Dstn	Destrin	DEST_RAT	9	-5.04893	0.949511
PD7 / VD7	G3V8R1;Q9JI85	G3V8R1;Q9JI85	-0.537744	0.537744	0.015721	0.0940945	28	G3V8R1;Q9JI85	Nucb2	Nucleobindin 2, isoform CRA_b;Nucleobindin-2	G3V8R1_RAT;NUCB2_RAT	7	-31.1153	0.688847
PD7 / VD7	Q9WVE9	Q9WVE9	-0.206534	0.206534	0.0156468	0.0940945	20	Q9WVE9	Itsn1	Intersectin-1	ITSN1_RAT	5	-13.3384	0.866616
PD7 / VD7	D3ZT01	D3ZT01	-0.653486	0.653486	0.0157057	0.0940945	20	D3ZT01	Cog2	Component of oligomeric golgi complex 2	D3ZT01_RAT	5	-36.4258	0.635742
PD7 / VD7	P11275	P11275	-0.480352	0.480352	0.0158068	0.0943762	20	P11275	Camk2a	Calcium/calmodulin-dependent protein kinase type II subunit alpha	KCC2A_RAT	4	-28.3197	0.716803
PD7 / VD7	F7F389;Q62930	F7F389;Q62930	0.310477	0.310477	0.0159078	0.0945434	76	F7F389;Q62930	C9	Complement component C9	F7F389_RAT;CO9_RAT	16	24.0118	1.24012
PD7 / VD7	Q99MZ4	Q99MZ4	0.0291758	0.0291758	0.0159513	0.0945434	44	Q99MZ4	Ggt7	Glutathione hydrolase 7	GGT7_RAT	10	2.0429	1.02043
PD7 / VD7	A0A0G2K2P5	A0A0G2K2P5	0.212457	0.212457	0.0162397	0.0957221	108	A0A0G2K2P5	Tjp1	Tight junction protein ZO-1	ZO1_RAT	22	15.866	1.15866
PD7 / VD7	D4AB01	D4AB01	-0.594451	0.594451	0.0161943	0.0957221	20	D4AB01	Hint2	Histidine triad nucleotide binding protein 2 (Predicted), isoform CRA_a	D4AB01_RAT	4	-33.7703	0.662297
PD7 / VD7	P43278	P43278	-0.27975	0.27975	0.0163141	0.0957616	24	P43278	H1f0	Histone H1.0	H10_RAT	3	-17.6266	0.823734
PD7 / VD7	G3V9W0	G3V9W0	-0.769929	0.769929	0.0163618	0.0958112	8	G3V9W0	Cetn2	Centrin 2	G3V9W0_RAT	2	-41.3554	0.586446
PD7 / VD7	P18484	P18484	0.144795	0.144795	0.0165233	0.0960371	156	P18484	Ap2a2	AP-2 complex subunit alpha-2	AP2A2_RAT	31	10.5573	1.10557
PD7 / VD7	A0A0A0MXW3;D4AEC0;P0C0S7	A0A0A0MXW3;D4AEC0;P0C0S7	0.0675665	0.0675665	0.0165541	0.0960371	24	A0A0A0MXW3;D4AEC0;P0C0S7	H2afz;H2afv;H2afz	Histone H2A;Histone H2A;Histone H2A.Z	A0A0A0MXW3_RAT;D4AEC0_RAT;H2AZ_RAT	3	4.79475	1.04795
PD7 / VD7	O35760	O35760	0.00127678	0.00127678	0.0165975	0.0960371	36	O35760	Idi1	Isopentenyl-diphosphate Delta-isomerase 1	IDI1_RAT	7	0.0885386	1.00089
PD7 / VD7	Q9JJ54	Q9JJ54	0.121208	0.121208	0.0166982	0.0963908	56	Q9JJ54	Hnrnpd	Heterogeneous nuclear ribonucleoprotein D0	HNRPD_RAT	9	8.76452	1.08765
PD7 / VD7	M0R8B6	M0R8B6	1.37389	1.37389	0.0167862	0.0966697	32	M0R8B6	Tubb1	Tubulin beta chain	M0R8B6_RAT	8	159.168	2.59168
PD7 / VD7	P46844	P46844	-0.0516448	0.0516448	0.0168457	0.0967817	52	P46844	Blvra	Biliverdin reductase A	BIEA_RAT	14	-3.51643	0.964836
PD7 / VD7	Q68FR6	Q68FR6	0.283279	0.283279	0.0170327	0.0972662	140	Q68FR6	Eef1g	Elongation factor 1-gamma	EF1G_RAT	20	21.6958	1.21696
PD7 / VD7	P0C5H9	P0C5H9	-0.346101	0.346101	0.0170495	0.0972662	44	P0C5H9	Manf	Mesencephalic astrocyte-derived neurotrophic factor	MANF_RAT	7	-21.3292	0.786708
PD7 / VD7	P15178	P15178	0.0539679	0.0539679	0.0171155	0.0974146	140	P15178	Dars	Aspartate--tRNA ligase, cytoplasmic	SYDC_RAT	26	3.81162	1.03812
PD7 / VD7	Q4FZS2	Q4FZS2	0.103229	0.103229	0.0173221	0.0979041	32	Q4FZS2	Bub3	BUB3 mitotic checkpoint protein	Q4FZS2_RAT	7	7.41748	1.07417
PD7 / VD7	A0A0H2UHR6;Q63207	A0A0H2UHR6;Q63207	1.52984	1.52984	0.0172866	0.0979041	12	A0A0H2UHR6;Q63207	F10	Coagulation factor X	A0A0H2UHR6_RAT;FA10_RAT	3	188.753	2.88753
PD7 / VD7	B4F7A9	B4F7A9	-1.13145	1.13145	0.0172825	0.0979041	12	B4F7A9	Csnk2a2	Casein kinase 2 alpha 2	B4F7A9_RAT	3	-54.3545	0.456455
PD7 / VD7	Q498R3	Q498R3	-0.292218	0.292218	0.0175631	0.0990322	60	Q498R3	Dnajc10	DnaJ homolog subfamily C member 10	DJC10_RAT	12	-18.3355	0.816645
PD7 / VD7	D4A269;P62959	D4A269;P62959	-0.150619	0.150619	0.017603	0.0990322	36	D4A269;P62959	;Hint1	Uncharacterized protein;Histidine triad nucleotide-binding protein 1	D4A269_RAT;HINT1_RAT	5	-9.91361	0.900864
PD7 / VD7	D3ZC89	D3ZC89	-0.753714	0.753714	0.0179394	0.100371	8	D3ZC89	NaN	Uncharacterized protein	D3ZC89_RAT	2	-40.6925	0.593075
PD7 / VD7	Q80W83	Q80W83	-0.280023	0.280023	0.0179647	0.100371	28	Q80W83	Ppp2r5b	Serine/threonine-protein phosphatase 2A 56 kDa regulatory subunit beta isoform	2A5B_RAT	6	-17.6422	0.823578
PD7 / VD7	P97532	P97532	-0.207126	0.207126	0.0179094	0.100371	40	P97532	Mpst	3-mercaptopyruvate sulfurtransferase	THTM_RAT	7	-13.3739	0.866261
PD7 / VD7	P48500	P48500	-0.0480592	0.0480592	0.0180597	0.100569	80	P48500	Tpi1	Triosephosphate isomerase	TPIS_RAT	12	-3.27634	0.967237
PD7 / VD7	G3V7M6;P20294	G3V7M6;P20294	-0.339997	0.339997	0.0181047	0.100569	20	G3V7M6;P20294	Cntf	Ciliary neurotrophic factor	G3V7M6_RAT;CNTF_RAT	5	-20.9957	0.790043
PD7 / VD7	A0A0H2UHS7;P12001	A0A0H2UHS7;P12001	0.207675	0.207675	0.0185833	0.102702	36	A0A0H2UHS7;P12001	Rpl18	60S ribosomal protein L18	A0A0H2UHS7_RAT;RL18_RAT	7	15.4825	1.15483
PD7 / VD7	Q4QQW8	Q4QQW8	-0.347862	0.347862	0.0185927	0.102702	28	Q4QQW8	Plbd2	Putative phospholipase B-like 2	PLBL2_RAT	7	-21.4252	0.785748
PD7 / VD7	A0A0G2JTY6;F1LRK4	A0A0G2JTY6;F1LRK4	-0.0072165	0.0072165	0.0186539	0.102807	48	A0A0G2JTY6;F1LRK4	Grsf1	G-rich RNA sequence-binding factor 1	A0A0G2JTY6_RAT;F1LRK4_RAT	9	-0.498961	0.99501
PD7 / VD7	D3ZW09	D3ZW09	-0.187184	0.187184	0.0188809	0.103824	44	D3ZW09	Sorcs2	Sortilin-related VPS10 domain-containing receptor 2	D3ZW09_RAT	11	-12.1682	0.878318
PD7 / VD7	P05197	P05197	-0.0170975	0.0170975	0.0193239	0.105694	271	P05197	Eef2	Elongation factor 2	EF2_RAT	44	-1.17812	0.988219
PD7 / VD7	A0A0G2K161;A0A0G2KAK2;D3ZIP3	A0A0G2K161;A0A0G2KAK2;D3ZIP3	0.552137	0.552137	0.0194814	0.105694	68	A0A0G2K161;A0A0G2KAK2;D3ZIP3	Epb41	Erythrocyte membrane protein band 4.1	A0A0G2K161_RAT;A0A0G2KAK2_RAT;D3ZIP3_RAT	13	46.6256	1.46626
PD7 / VD7	G3V6S2	G3V6S2	-0.184574	0.184574	0.0194673	0.105694	88	G3V6S2	Aco1	Cytoplasmic aconitate hydratase	G3V6S2_RAT	19	-12.0091	0.879909
PD7 / VD7	F1LNZ2;F1LRS4;H9KVE4;Q2LC84	F1LNZ2;F1LRS4;H9KVE4;Q2LC84	NaN	NaN	0.0260202	0.122616	4	F1LNZ2;F1LRS4;H9KVE4;Q2LC84	Numb	Protein numb homolog	F1LNZ2_RAT;F1LRS4_RAT;H9KVE4_RAT;NUMB_RAT	1	NaN	NaN
PD7 / VD7	Q4V8H5	Q4V8H5	0.0982538	0.0982538	0.0194294	0.105694	72	Q4V8H5	Dnpep	Aspartyl aminopeptidase	Q4V8H5_RAT	16	7.0477	1.07048
PD7 / VD7	A0A0G2K5G6;G3V9X8	A0A0G2K5G6;G3V9X8	0.538292	0.538292	0.0194549	0.105694	12	A0A0G2K5G6;G3V9X8	Magt1	Magnesium transporter protein 1	A0A0G2K5G6_RAT;G3V9X8_RAT	2	45.2252	1.45225
PD7 / VD7	A0A0G2K079	A0A0G2K079	-0.133187	0.133187	0.0194099	0.105694	48	A0A0G2K079	Bcas1	Breast carcinoma-amplified sequence 1 homolog	A0A0G2K079_RAT	8	-8.81853	0.911815
PD7 / VD7	O35796	O35796	0.0164688	0.0164688	0.0196212	0.106216	36	O35796	C1qbp	Complement component 1 Q subcomponent-binding protein, mitochondrial	C1QBP_RAT	6	1.14807	1.01148
PD7 / VD7	A0A0G2KAZ7	A0A0G2KAZ7	-0.104073	0.104073	0.019724	0.106536	52	A0A0G2KAZ7	Hnrnpdl	Heterogeneous nuclear ribonucleoprotein D-like	A0A0G2KAZ7_RAT	10	-6.95972	0.930403
PD7 / VD7	P63086	P63086	0.0551329	0.0551329	0.0198225	0.106595	104	P63086	Mapk1	Mitogen-activated protein kinase 1	MK01_RAT	16	3.89548	1.03895
PD7 / VD7	Q64654	Q64654	-0.0349442	0.0349442	0.0198662	0.106595	48	Q64654	Cyp51a1	Lanosterol 14-alpha demethylase	CP51A_RAT	12	-2.39305	0.97607
PD7 / VD7	Q5XIP2	Q5XIP2	-0.670813	0.670813	0.0200764	0.107015	16	Q5XIP2	Pigk	GPI-anchor transamidase	Q5XIP2_RAT	4	-37.1848	0.628152
PD7 / VD7	A0A0G2K6I4;Q5XHX3	A0A0G2K6I4;Q5XHX3	0.878666	0.878666	0.0200123	0.107015	16	A0A0G2K6I4;Q5XHX3	Enah	ENAH, actin regulator;ENAH, actin regulator	A0A0G2K6I4_RAT;Q5XHX3_RAT	3	83.8674	1.83867
PD7 / VD7	Q3ZAV8	Q3ZAV8	-0.599811	0.599811	0.0200578	0.107015	44	Q3ZAV8	Edc4	Enhancer of mRNA-decapping protein 4	EDC4_RAT	11	-34.0159	0.659841
PD7 / VD7	A0A0G2KBB9;F1LM42	A0A0G2KBB9;F1LM42	0.036583	0.036583	0.0203295	0.108128	68	A0A0G2KBB9;F1LM42	Ank2	Ankyrin 2	A0A0G2KBB9_RAT;F1LM42_RAT	14	2.56816	1.02568
PD7 / VD7	P62632	P62632	-0.0257314	0.0257314	0.020416	0.108352	68	P62632	Eef1a2	Elongation factor 1-alpha 2	EF1A2_RAT	10	-1.76775	0.982322
PD7 / VD7	Q5FVL2	Q5FVL2	-0.0431142	0.0431142	0.0204817	0.108464	28	Q5FVL2	Emc8	ER membrane protein complex subunit 8	EMC8_RAT	4	-2.94423	0.970558
PD7 / VD7	D4AD70;P63174	D4AD70;P63174	-0.183291	0.183291	0.0209058	0.11023	28	D4AD70;P63174	;Rpl38	Uncharacterized protein;60S ribosomal protein L38	D4AD70_RAT;RL38_RAT	5	-11.9308	0.880692
PD7 / VD7	G3V7L1	G3V7L1	0.207833	0.207833	0.0212096	0.111111	524	G3V7L1	Utrn	Utrophin	G3V7L1_RAT	104	15.4952	1.15495
PD7 / VD7	A0A140TA99;P62870	A0A140TA99;P62870	-0.0948284	0.0948284	0.0213003	0.111296	40	A0A140TA99;P62870	Elob	Elongin-B	A0A140TA99_RAT;ELOB_RAT	8	-6.36164	0.936384
PD7 / VD7	B2GUX5	B2GUX5	-0.125968	0.125968	0.0213364	0.111296	20	B2GUX5	Nt5c3a	5'-nucleotidase	B2GUX5_RAT	5	-8.36107	0.916389
PD7 / VD7	A0A096MIX2;E9PT29	A0A096MIX2;E9PT29	0.166781	0.166781	0.0216109	0.111705	96	A0A096MIX2;E9PT29	Ddx17	DEAD (Asp-Glu-Ala-Asp) box polypeptide 17, isoform CRA_a;DEAD-box helicase 17	A0A096MIX2_RAT;E9PT29_RAT	21	12.2551	1.12255
PD7 / VD7	F1M3D3	F1M3D3	0.191723	0.191723	0.0216439	0.111705	124	F1M3D3	Hnrnpm	Heterogeneous nuclear ribonucleoprotein M	F1M3D3_RAT	23	14.2127	1.14213
PD7 / VD7	Q792I0	Q792I0	-0.516777	0.516777	0.0215486	0.111705	36	Q792I0	Lin7c	Protein lin-7 homolog C	LIN7C_RAT	6	-30.1068	0.698932
PD7 / VD7	F1LRE1	F1LRE1	-0.104638	0.104638	0.0214933	0.111705	32	F1LRE1	Gsr	Glutathione reductase	F1LRE1_RAT	6	-6.99614	0.930039
PD7 / VD7	G3V6P1;P07174	G3V6P1;P07174	-0.281966	0.281966	0.0215562	0.111705	16	G3V6P1;P07174	Ngfr	Nerve growth factor receptor (TNFR superfamily, member 16);Tumor necrosis factor receptor superfamily member 16	G3V6P1_RAT;TNR16_RAT	4	-17.7531	0.822469
PD7 / VD7	A0A0G2K8Q8	A0A0G2K8Q8	-0.613598	0.613598	0.0218296	0.112425	12	A0A0G2K8Q8	Uqcr10	Ubiquinol-cytochrome c reductase, complex III subunit X	A0A0G2K8Q8_RAT	2	-34.6435	0.653565
PD7 / VD7	Q6AY84	Q6AY84	0.046009	0.046009	0.0219919	0.112948	92	Q6AY84	Scrn1	Secernin-1	SCRN1_RAT	13	3.2405	1.03241
PD7 / VD7	G3V679	G3V679	-0.0897701	0.0897701	0.022024	0.112948	40	G3V679	Tfrc	Transferrin receptor protein 1	G3V679_RAT	10	-6.03275	0.939672
PD7 / VD7	A0A0G2K0W9	A0A0G2K0W9	0.0787498	0.0787498	0.0227793	0.115846	68	A0A0G2K0W9	Psma7	Proteasome subunit alpha type	A0A0G2K0W9_RAT	13	5.61024	1.0561
PD7 / VD7	Q6AYK6	Q6AYK6	-0.00956727	0.00956727	0.0227639	0.115846	52	Q6AYK6	Cacybp	Calcyclin-binding protein	CYBP_RAT	9	-0.660959	0.99339
PD7 / VD7	P61149	P61149	-0.226226	0.226226	0.0226955	0.115846	32	P61149	Fgf1	Fibroblast growth factor 1	FGF1_RAT	7	-14.5132	0.854868
PD7 / VD7	Q06647	Q06647	-0.00280638	0.00280638	0.0228343	0.115884	64	Q06647	Atp5po	ATP synthase subunit O, mitochondrial	ATPO_RAT	9	-0.194334	0.998057
PD7 / VD7	Q5M7U6	Q5M7U6	0.0327199	0.0327199	0.0228839	0.115894	64	Q5M7U6	Actr2	Actin-related protein 2	ARP2_RAT	11	2.29388	1.02294
PD7 / VD7	Q7TPB1	Q7TPB1	0.0234618	0.0234618	0.0231146	0.11682	140	Q7TPB1	Cct4	T-complex protein 1 subunit delta	TCPD_RAT	25	1.63955	1.0164
PD7 / VD7	D3ZN64	D3ZN64	0.224452	0.224452	0.0231901	0.116826	112	D3ZN64	Col28a1	Collagen type XXVIII alpha 1 chain	D3ZN64_RAT	20	16.8334	1.16833
PD7 / VD7	D4AAE9	D4AAE9	-0.554765	0.554765	0.0232117	0.116826	16	D4AAE9	Cisd2	CDGSH iron sulfur domain 2	D4AAE9_RAT	3	-31.9232	0.680768
PD7 / VD7	P05943	P05943	-0.776053	0.776053	0.0234304	0.117683	16	P05943	S100a10	Protein S100-A10	S10AA_RAT	2	-41.6038	0.583962
PD7 / VD7	P09811	P09811	-0.140137	0.140137	0.0235904	0.118243	64	P09811	Pygl	Glycogen phosphorylase, liver form	PYGL_RAT	14	-9.25672	0.907433
PD7 / VD7	P63029	P63029	-0.196747	0.196747	0.023768	0.118889	44	P63029	Tpt1	Translationally-controlled tumor protein	TCTP_RAT	6	-12.7484	0.872516
PD7 / VD7	P10760	P10760	0.118075	0.118075	0.0240174	0.119157	92	P10760	Ahcy	Adenosylhomocysteinase	SAHH_RAT	18	8.52861	1.08529
PD7 / VD7	A0A0G2K6H2;P57113	A0A0G2K6H2;P57113	-0.425385	0.425385	0.0239047	0.119157	20	A0A0G2K6H2;P57113	Gstz1	Maleylacetoacetate isomerase	A0A0G2K6H2_RAT;MAAI_RAT	4	-25.536	0.74464
PD7 / VD7	G3V6P6	G3V6P6	-0.880452	0.880452	0.0239465	0.119157	20	G3V6P6	Rbm3	RNA binding motif protein 3, isoform CRA_a	G3V6P6_RAT	3	-45.6803	0.543197
PD7 / VD7	B0BNL2	B0BNL2	-0.33952	0.33952	0.0241499	0.119572	44	B0BNL2	Pin1	Peptidyl-prolyl cis-trans isomerase	B0BNL2_RAT	5	-20.9696	0.790304
PD7 / VD7	G3V8G2	G3V8G2	-0.175679	0.175679	0.0244176	0.120652	44	G3V8G2	Psmd5	Proteasome (Prosome, macropain) 26S subunit, non-ATPase, 5 (Predicted), isoform CRA_a	G3V8G2_RAT	9	-11.4649	0.885351
PD7 / VD7	P25113	P25113	0.114622	0.114622	0.02453	0.120962	100	P25113	Pgam1	Phosphoglycerate mutase 1	PGAM1_RAT	14	8.26915	1.08269
PD7 / VD7	D3ZVQ0	D3ZVQ0	-0.10032	0.10032	0.0247097	0.121602	176	D3ZVQ0	Usp5	Ubiquitin carboxyl-terminal hydrolase	D3ZVQ0_RAT	33	-6.71738	0.932826
PD7 / VD7	F1LQJ7	F1LQJ7	0.121515	0.121515	0.02483	0.121733	68	F1LQJ7	Pck2	Phosphoenolpyruvate carboxykinase 2 (mitochondrial)	F1LQJ7_RAT	16	8.78766	1.08788
PD7 / VD7	P21708	P21708	-0.0144394	0.0144394	0.0248829	0.121733	76	P21708	Mapk3	Mitogen-activated protein kinase 3	MK03_RAT	15	-0.995872	0.990041
PD7 / VD7	F1LQQ7	F1LQQ7	-0.118417	0.118417	0.0249211	0.121733	136	F1LQQ7	Scn7a	Sodium channel protein	F1LQQ7_RAT	25	-7.88019	0.921198
PD7 / VD7	D3ZQM0	D3ZQM0	-0.728035	0.728035	0.0249363	0.121733	52	D3ZQM0	Sf3a1	Splicing factor 3a, subunit 1	D3ZQM0_RAT	12	-39.6274	0.603726
PD7 / VD7	Q4V7A0	Q4V7A0	-0.53613	0.53613	0.0253504	0.122284	40	Q4V7A0	Wdr61	WD repeat-containing protein 61	WDR61_RAT	9	-31.0382	0.689618
PD7 / VD7	Q63569;Q6P6U2	Q63569;Q6P6U2	0.0990613	0.0990613	0.0252073	0.122284	96	Q63569;Q6P6U2	Psmc3	26S proteasome regulatory subunit 6A	PRS6A_RAT;Q6P6U2_RAT	18	7.10763	1.07108
PD7 / VD7	Q4QQV3	Q4QQV3	-0.452352	0.452352	0.0252925	0.122284	20	Q4QQV3	Fam162a	Protein FAM162A	F162A_RAT	4	-26.915	0.73085
PD7 / VD7	Q63570	Q63570	-0.170459	0.170459	0.0253234	0.122284	80	Q63570	Psmc4	26S proteasome regulatory subunit 6B	PRS6B_RAT	16	-11.144	0.88856
PD7 / VD7	Q9Z0V5	Q9Z0V5	0.0728807	0.0728807	0.025145	0.122284	52	Q9Z0V5	Prdx4	Peroxiredoxin-4	PRDX4_RAT	9	5.18148	1.05181
PD7 / VD7	B2RZD6	B2RZD6	-0.359198	0.359198	0.0251508	0.122284	12	B2RZD6	Ndufa4	NDUFA4, mitochondrial complex-associated	B2RZD6_RAT	3	-22.0402	0.779598
PD7 / VD7	D3ZDT1	D3ZDT1	0.0954372	0.0954372	0.0256152	0.122372	248	D3ZDT1	Epb41l2	Erythrocyte membrane protein band 4.1-like 2	D3ZDT1_RAT	40	6.83891	1.06839
PD7 / VD7	Q3KRF2	Q3KRF2	0.340781	0.340781	0.0256967	0.122372	240	Q3KRF2	Hdlbp	High density lipoprotein binding protein (Vigilin)	Q3KRF2_RAT	44	26.6442	1.26644
PD7 / VD7	A0A0G2JSU4	A0A0G2JSU4	-0.292251	0.292251	0.025676	0.122372	64	A0A0G2JSU4	Ndrg2	N-myc downstream regulated gene 2, isoform CRA_b	A0A0G2JSU4_RAT	12	-18.3373	0.816627
PD7 / VD7	Q5PPN5	Q5PPN5	-0.2529	0.2529	0.0257067	0.122372	40	Q5PPN5	Tppp3	Tubulin polymerization-promoting protein family member 3	TPPP3_RAT	7	-16.0792	0.839208
PD7 / VD7	Q6P7Q4	Q6P7Q4	-0.448076	0.448076	0.0257704	0.122372	28	Q6P7Q4	Glo1	Lactoylglutathione lyase	LGUL_RAT	6	-26.698	0.73302
PD7 / VD7	B1WBW4	B1WBW4	-0.837355	0.837355	0.0255669	0.122372	16	B1WBW4	Armc10	Armadillo repeat-containing protein 10	ARM10_RAT	4	-44.0331	0.559669
PD7 / VD7	P56522	P56522	0.722977	0.722977	0.0255519	0.122372	8	P56522	Fdxr	NADPH:adrenodoxin oxidoreductase, mitochondrial	ADRO_RAT	2	65.0584	1.65058
PD7 / VD7	P19944	P19944	-1.05161	1.05161	0.0257311	0.122372	12	P19944	Rplp1	60S acidic ribosomal protein P1	RLA1_RAT	3	-51.7569	0.482431
PD7 / VD7	Q62658	Q62658	0.219987	0.219987	0.0260555	0.122616	64	Q62658	Fkbp1a	Peptidyl-prolyl cis-trans isomerase FKBP1A	FKB1A_RAT	8	16.4723	1.16472
PD7 / VD7	Q6AY58	Q6AY58	-0.0600947	0.0600947	0.0260402	0.122616	20	Q6AY58	Bcap31	B-cell receptor-associated protein 31	Q6AY58_RAT	2	-4.07988	0.959201
PD7 / VD7	B0BMY7	B0BMY7	-0.417506	0.417506	0.0260679	0.122616	16	B0BMY7	Twf2	Protein tyrosine kinase 9-like (A6-related protein) (Predicted), isoform CRA_b	B0BMY7_RAT	3	-25.1282	0.748718
PD7 / VD7	A0A0G2K707;O08560	A0A0G2K707;O08560	0.393394	0.393394	0.0260736	0.122616	8	A0A0G2K707;O08560	Dgkz	Diacylglycerol kinase;Diacylglycerol kinase zeta	A0A0G2K707_RAT;DGKZ_RAT	2	31.348	1.31348
PD7 / VD7	D3ZXH7	D3ZXH7	-0.142874	0.142874	0.0261515	0.122746	28	D3ZXH7	Alyref	Aly/REF export factor	D3ZXH7_RAT	4	-9.42867	0.905713
PD7 / VD7	P52555	P52555	0.000768374	0.000768374	0.0263485	0.123196	52	P52555	Erp29	Endoplasmic reticulum resident protein 29	ERP29_RAT	12	0.0532738	1.00053
PD7 / VD7	G3V728	G3V728	-0.229136	0.229136	0.0263042	0.123196	48	G3V728	Nipsnap1	4-nitrophenylphosphatase domain and non-neuronal SNAP25-like protein homolog 1 (C. elegans), isoform CRA_b	G3V728_RAT	8	-14.6854	0.853146
PD7 / VD7	P14659	P14659	-0.129945	0.129945	0.026423	0.123235	112	P14659	Hspa2	Heat shock-related 70 kDa protein 2	HSP72_RAT	17	-8.61336	0.913866
PD7 / VD7	A0A0G2JU77	A0A0G2JU77	0.108073	0.108073	0.0264581	0.123235	32	A0A0G2JU77	Eif3k	Eukaryotic translation initiation factor 3 subunit K	A0A0G2JU77_RAT	6	7.77878	1.07779
PD7 / VD7	D4ACS9	D4ACS9	NaN	NaN	0.0337507	0.140302	4	D4ACS9	Tmem229a	RCG27978	D4ACS9_RAT	1	NaN	NaN
PD7 / VD7	Q5U2U2	Q5U2U2	-0.981897	0.981897	0.0266472	0.123879	20	Q5U2U2	Crkl	Crk-like protein	CRKL_RAT	5	-49.3687	0.506313
PD7 / VD7	P15684	P15684	-0.0826055	0.0826055	0.0267179	0.123971	56	P15684	Anpep	Aminopeptidase N	AMPN_RAT	14	-5.56494	0.944351
PD7 / VD7	A0A0G2K9V6	A0A0G2K9V6	-0.0643624	0.0643624	0.027066	0.12511	96	A0A0G2K9V6	Tars	Threonine--tRNA ligase, cytoplasmic	A0A0G2K9V6_RAT	21	-4.36321	0.956368
PD7 / VD7	P09606	P09606	0.0298669	0.0298669	0.0270322	0.12511	40	P09606	Glul	Glutamine synthetase	GLNA_RAT	9	2.09179	1.02092
PD7 / VD7	Q6P685	Q6P685	0.0854827	0.0854827	0.027628	0.126984	80	Q6P685	Eif2s2	Eukaryotic translation initiation factor 2 subunit beta	Q6P685_RAT	15	6.10427	1.06104
PD7 / VD7	Q68FP1	Q68FP1	0.0316707	0.0316707	0.0276216	0.126984	56	Q68FP1	Gsn	Gelsolin	GELS_RAT	11	2.21952	1.0222
PD7 / VD7	M0R6E0	M0R6E0	-0.871125	0.871125	0.0277559	0.127332	12	M0R6E0	Atp9a	Phospholipid-transporting ATPase	M0R6E0_RAT	3	-45.3279	0.546721
PD7 / VD7	P11762	P11762	-0.123037	0.123037	0.0278735	0.127631	61	P11762	Lgals1	Galectin-1	LEG1_RAT	7	-8.17476	0.918252
PD7 / VD7	A0A0G2JW97;A0A0G2JZI0;M0RBF0;O88453	A0A0G2JW97;A0A0G2JZI0;M0RBF0;O88453	-0.176282	0.176282	0.0279616	0.127795	32	A0A0G2JW97;A0A0G2JZI0;M0RBF0;O88453	Safb	Scaffold attachment factor B1;Scaffold attachment factor B;Scaffold attachment factor B1;Scaffold attachment factor B1	A0A0G2JW97_RAT;A0A0G2JZI0_RAT;M0RBF0_RAT;SAFB1_RAT	7	-11.5019	0.884981
PD7 / VD7	F1LNQ9;F1LNR1	F1LNQ9;F1LNR1	0.12857	0.12857	0.0280861	0.127843	88	F1LNQ9;F1LNR1	Clasp1	Cytoplasmic linker-associated protein 1	F1LNQ9_RAT;F1LNR1_RAT	20	9.32096	1.09321
PD7 / VD7	P08644	P08644	0.516384	0.516384	0.0281296	0.127843	12	P08644	Kras	GTPase KRas	RASK_RAT	2	43.0365	1.43037
PD7 / VD7	G3V7Z4;P07092	G3V7Z4;P07092	-0.892822	0.892822	0.0281059	0.127843	8	G3V7Z4;P07092	Serpine2	Glia-derived nexin	G3V7Z4_RAT;GDN_RAT	2	-46.144	0.53856
PD7 / VD7	D3ZUM4	D3ZUM4	-0.232361	0.232361	0.0283192	0.128465	28	D3ZUM4	Glb1	Beta-galactosidase	D3ZUM4_RAT	7	-14.8759	0.851241
PD7 / VD7	G3V7S0;P70627	G3V7S0;P70627	0.108649	0.108649	0.0284709	0.128605	60	G3V7S0;P70627	Folh1	Folate hydrolase;Glutamate carboxypeptidase 2	G3V7S0_RAT;FOLH1_RAT	13	7.82179	1.07822
PD7 / VD7	A0A0H2UHQ3;P0C5W1	A0A0H2UHQ3;P0C5W1	-0.625355	0.625355	0.0285084	0.128605	16	A0A0H2UHQ3;P0C5W1	Map1s	Microtubule-associated protein 1S	A0A0H2UHQ3_RAT;MAP1S_RAT	4	-35.174	0.64826
PD7 / VD7	O08623	O08623	-0.565823	0.565823	0.0284118	0.128605	16	O08623	Sqstm1	Sequestosome-1	SQSTM_RAT	4	-32.443	0.67557
PD7 / VD7	O35964	O35964	0.124926	0.124926	0.0285667	0.128629	20	O35964	Sh3gl1	Endophilin-A2	SH3G1_RAT	4	9.04518	1.09045
PD7 / VD7	P61589	P61589	0.170687	0.170687	0.0287917	0.128817	72	P61589	Rhoa	Transforming protein RhoA	RHOA_RAT	11	12.5594	1.12559
PD7 / VD7	G3V7N9;P31721	G3V7N9;P31721	0.522879	0.522879	0.0286865	0.128817	8	G3V7N9;P31721	C1qb	Adiponectin a;Complement C1q subcomponent subunit B	G3V7N9_RAT;C1QB_RAT	2	43.682	1.43682
PD7 / VD7	A0A0G2JX47;G3V763;Q9JI03	A0A0G2JX47;G3V763;Q9JI03	-0.572687	0.572687	0.0288198	0.128817	16	A0A0G2JX47;G3V763;Q9JI03	Col5a1	Collagen alpha-1(V) chain	A0A0G2JX47_RAT;G3V763_RAT;CO5A1_RAT	3	-32.7637	0.672363
PD7 / VD7	Q5U2U8	Q5U2U8	-0.402053	0.402053	0.0289795	0.129039	60	Q5U2U8	Bag3	Bcl2-associated athanogene 3	Q5U2U8_RAT	12	-24.3219	0.756781
PD7 / VD7	F7EMB2;Q6QI16	F7EMB2;Q6QI16	-0.697852	0.697852	0.0289622	0.129039	36	F7EMB2;Q6QI16	Rtraf	RNA transcription, translation and transport factor;LRRGT00192	F7EMB2_RAT;Q6QI16_RAT	8	-38.3511	0.616489
PD7 / VD7	P63036	P63036	0.201876	0.201876	0.0290284	0.129039	52	P63036	Dnaja1	DnaJ homolog subfamily A member 1	DNJA1_RAT	11	15.0193	1.15019
PD7 / VD7	Q32KK2	Q32KK2	-0.330387	0.330387	0.0293208	0.130101	28	Q32KK2	Arsa	Arylsulfatase A	Q32KK2_RAT	5	-20.4677	0.795323
PD7 / VD7	D3ZZR5	D3ZZR5	-0.225158	0.225158	0.0294222	0.130314	16	D3ZZR5	Snrpa1	Small nuclear ribonucleoprotein polypeptide A'	D3ZZR5_RAT	3	-14.4498	0.855502
PD7 / VD7	D4A022	D4A022	-0.566329	0.566329	0.0295525	0.130653	20	D4A022	Gapvd1	GTPase-activating protein and VPS9 domains 1	D4A022_RAT	5	-32.4667	0.675333
PD7 / VD7	G3V8M5;Q5BJ92	G3V8M5;Q5BJ92	-0.553187	0.553187	0.0297834	0.131435	12	G3V8M5;Q5BJ92	Ppp4c	Serine/threonine-protein phosphatase;Serine/threonine-protein phosphatase 4 catalytic subunit	G3V8M5_RAT;PP4C_RAT	3	-31.8487	0.681513
PD7 / VD7	F1LMV9	F1LMV9	-0.183068	0.183068	0.0298459	0.131473	52	F1LMV9	Coro2b	Coronin	F1LMV9_RAT	11	-11.9172	0.880828
PD7 / VD7	A0A0A0MXX5;D4A1J4	A0A0A0MXX5;D4A1J4	NaN	NaN	0.0368662	0.146026	4	A0A0A0MXX5;D4A1J4	Bdh2	3-hydroxybutyrate dehydrogenase type 2	A0A0A0MXX5_RAT;BDH2_RAT	1	NaN	NaN
PD7 / VD7	Q6AYI1	Q6AYI1	0.0938832	0.0938832	0.0299921	0.131641	84	Q6AYI1	Ddx5	DEAD (Asp-Glu-Ala-Asp) box polypeptide 5	Q6AYI1_RAT	17	6.72389	1.06724
PD7 / VD7	D4ADP9	D4ADP9	NaN	NaN	0.0372361	0.147013	4	D4ADP9	Copz2	Coatomer protein complex, subunit zeta 2	D4ADP9_RAT	1	NaN	NaN
PD7 / VD7	Q5PQW8;Q63663	Q5PQW8;Q63663	-0.321058	0.321058	0.0299715	0.131641	36	Q5PQW8;Q63663	Gbp2	Guanylate binding protein 2;Guanylate-binding protein 1	Q5PQW8_RAT;GBP2_RAT	9	-19.9517	0.800483
PD7 / VD7	F1LS79;Q00657	F1LS79;Q00657	0.089192	0.089192	0.0301604	0.132142	112	F1LS79;Q00657	Cspg4	Chondroitin sulfate proteoglycan 4	F1LS79_RAT;CSPG4_RAT	24	6.37743	1.06377
PD7 / VD7	Q5XHZ8	Q5XHZ8	-0.185405	0.185405	0.030309	0.132317	28	Q5XHZ8	Cog3	Component of oligomeric golgi complex 3	Q5XHZ8_RAT	6	-12.0598	0.879402
PD7 / VD7	A0A0G2K059;M0RDI5	A0A0G2K059;M0RDI5	-1.05665	1.05665	0.0302981	0.132317	16	A0A0G2K059;M0RDI5	Mcu	Mitochondrial calcium uniporter	A0A0G2K059_RAT;M0RDI5_RAT	4	-51.9251	0.480749
PD7 / VD7	F8WG67;Q64559	F8WG67;Q64559	0.025605	0.025605	0.0307352	0.133883	76	F8WG67;Q64559	Acot7	Acyl-CoA thioesterase 7, isoform CRA_a;Cytosolic acyl coenzyme A thioester hydrolase	F8WG67_RAT;BACH_RAT	14	1.79065	1.01791
PD7 / VD7	B5DFC9	B5DFC9	-0.0136991	0.0136991	0.0307778	0.133883	204	B5DFC9	Nid2	Nidogen-2	NID2_RAT	36	-0.945057	0.990549
PD7 / VD7	A0A0G2JX67;D3ZZ32;Q5HZA6	A0A0G2JX67;D3ZZ32;Q5HZA6	-0.0760605	0.0760605	0.0309779	0.134036	72	A0A0G2JX67;D3ZZ32;Q5HZA6	Prepl	Prolyl endopeptidase-like	A0A0G2JX67_RAT;D3ZZ32_RAT;PPCEL_RAT	15	-5.13555	0.948645
PD7 / VD7	A0A0H2UHE1;P13086	A0A0H2UHE1;P13086	-0.17196	0.17196	0.030942	0.134036	56	A0A0H2UHE1;P13086	Suclg1	Succinate--CoA ligase [ADP/GDP-forming] subunit alpha, mitochondrial;Succinate--CoA ligase [ADP/GDP-forming] subunit alpha, mitochondrial	A0A0H2UHE1_RAT;SUCA_RAT	8	-11.2364	0.887636
PD7 / VD7	P84817	P84817	-0.558406	0.558406	0.0309272	0.134036	16	P84817	Fis1	Mitochondrial fission 1 protein	FIS1_RAT	4	-32.0948	0.679052
PD7 / VD7	P13676	P13676	-0.210227	0.210227	0.0312048	0.13457	76	P13676	Apeh	Acylamino-acid-releasing enzyme	ACPH_RAT	16	-13.5599	0.864401
PD7 / VD7	Q9WVH8	Q9WVH8	-0.0862026	0.0862026	0.0312424	0.13457	48	Q9WVH8	Fbln5	Fibulin-5	FBLN5_RAT	9	-5.8001	0.941999
PD7 / VD7	P63081	P63081	-0.890545	0.890545	0.0312671	0.13457	12	P63081	Atp6v0c	V-type proton ATPase 16 kDa proteolipid subunit	VATL_RAT	2	-46.059	0.53941
PD7 / VD7	Q62651	Q62651	-0.0503738	0.0503738	0.0313894	0.134621	48	Q62651	Ech1	Delta(3,5)-Delta(2,4)-dienoyl-CoA isomerase, mitochondrial	ECH1_RAT	10	-3.43139	0.965686
PD7 / VD7	P12075	P12075	0.233677	0.233677	0.0313375	0.134621	20	P12075	Cox5b	Cytochrome c oxidase subunit 5B, mitochondrial	COX5B_RAT	4	17.5828	1.17583
PD7 / VD7	P85108	P85108	0.049267	0.049267	0.0314693	0.134726	79	P85108	Tubb2a	Tubulin beta-2A chain	TBB2A_RAT	9	3.4739	1.03474
PD7 / VD7	D3ZAA9	D3ZAA9	NaN	NaN	0.0402526	0.154906	4	D3ZAA9	Mpp2	MAGUK p55 subfamily member 2	MPP2_RAT	1	NaN	NaN
PD7 / VD7	A0A0G2JYD8;G3V7U6	A0A0G2JYD8;G3V7U6	-0.0785901	0.0785901	0.0315902	0.135007	60	A0A0G2JYD8;G3V7U6	Capn5	Calpain-5	A0A0G2JYD8_RAT;G3V7U6_RAT	13	-5.30174	0.946983
PD7 / VD7	B2RZ72	B2RZ72	-0.0734362	0.0734362	0.031819	0.135746	36	B2RZ72	Arpc4	Actin-related protein 2/3 complex subunit 4	B2RZ72_RAT	7	-4.96283	0.950372
PD7 / VD7	A0A0G2K9I8;Q63009	A0A0G2K9I8;Q63009	0.0548556	0.0548556	0.0319309	0.135985	52	A0A0G2K9I8;Q63009	LOC100361025;Prmt1	Protein arginine methyltransferase 1-like;Protein arginine N-methyltransferase 1	A0A0G2K9I8_RAT;ANM1_RAT	12	3.87551	1.03876
PD7 / VD7	P29067	P29067	0.939972	0.939972	0.0320396	0.13621	20	P29067	Arrb2	Beta-arrestin-2	ARRB2_RAT	4	91.8491	1.91849
PD7 / VD7	D4A9P9	D4A9P9	-0.55994	0.55994	0.0323401	0.137248	12	D4A9P9	Hhatl	Gup1, glycerol uptake/transporter homolog (Yeast) (Predicted)	D4A9P9_RAT	3	-32.1669	0.678331
PD7 / VD7	B5DFD8	B5DFD8	-0.191626	0.191626	0.0324357	0.137415	44	B5DFD8	Sh3bgrl	SH3 domain-binding glutamic acid-rich-like protein	B5DFD8_RAT	7	-12.4382	0.875618
PD7 / VD7	Q9JLA3	Q9JLA3	0.391352	0.391352	0.0325378	0.137458	204	Q9JLA3	Uggt1	UDP-glucose:glycoprotein glucosyltransferase 1	UGGG1_RAT	42	31.1622	1.31162
PD7 / VD7	P56574	P56574	-0.239312	0.239312	0.0326153	0.137458	108	P56574	Idh2	Isocitrate dehydrogenase [NADP], mitochondrial	IDHP_RAT	20	-15.2851	0.847149
PD7 / VD7	Q3B7U1	Q3B7U1	0.671442	0.671442	0.0325987	0.137458	16	Q3B7U1	Maged2	MAGE family member D2	Q3B7U1_RAT	3	59.2664	1.59266
PD7 / VD7	P29314	P29314	-0.0524464	0.0524464	0.0328072	0.138028	48	P29314	Rps9	40S ribosomal protein S9	RS9_RAT	8	-3.57003	0.9643
PD7 / VD7	P02091	P02091	-0.166114	0.166114	0.0330438	0.138632	212	P02091	Hbb	Hemoglobin subunit beta-1	HBB1_RAT	24	-10.876	0.89124
PD7 / VD7	P07150	P07150	0.146445	0.146445	0.0330646	0.138632	96	P07150	Anxa1	Annexin A1	ANXA1_RAT	16	10.6839	1.10684
PD7 / VD7	Q6AYT7	Q6AYT7	0.278564	0.278564	0.0331515	0.138758	80	Q6AYT7	Abhd12	Lysophosphatidylserine lipase ABHD12	ABD12_RAT	14	21.2987	1.21299
PD7 / VD7	A0A140TAB7;Q9Z2J5	A0A140TAB7;Q9Z2J5	NaN	NaN	0.0417769	0.157381	4	A0A140TAB7;Q9Z2J5	Vamp5	Vesicle-associated membrane protein 5	A0A140TAB7_RAT;VAMP5_RAT	1	NaN	NaN
PD7 / VD7	P47728	P47728	-0.0550694	0.0550694	0.0334045	0.139577	40	P47728	Calb2	Calretinin	CALB2_RAT	9	-3.74519	0.962548
PD7 / VD7	P04897	P04897	0.206686	0.206686	0.0335774	0.13982	112	P04897	Gnai2	Guanine nucleotide-binding protein G(i) subunit alpha-2	GNAI2_RAT	19	15.4034	1.15403
PD7 / VD7	Q9WUC4	Q9WUC4	-0.645917	0.645917	0.0335353	0.13982	16	Q9WUC4	Atox1	Copper transport protein ATOX1	ATOX1_RAT	3	-36.0913	0.639087
PD7 / VD7	G3V6S5	G3V6S5	0.0224476	0.0224476	0.0339224	0.140775	92	G3V6S5	Mthfd1	C-1-tetrahydrofolate synthase, cytoplasmic	G3V6S5_RAT	20	1.56812	1.01568
PD7 / VD7	A0A0G2K785;A0A0G2KA23;D3ZCI0;Q63060	A0A0G2K785;A0A0G2KA23;D3ZCI0;Q63060	-0.299468	0.299468	0.0341662	0.141536	16	A0A0G2K785;A0A0G2KA23;D3ZCI0;Q63060	Gk	Glycerol kinase	A0A0G2K785_RAT;A0A0G2KA23_RAT;D3ZCI0_RAT;GLPK_RAT	4	-18.7448	0.812552
PD7 / VD7	D3ZH75	D3ZH75	-0.912214	0.912214	0.034222	0.141536	8	D3ZH75	Akt1s1	AKT1 substrate 1	D3ZH75_RAT	2	-46.8631	0.531369
PD7 / VD7	Q5XIP0	Q5XIP0	-0.209865	0.209865	0.0343408	0.141649	32	Q5XIP0	Dnajb4	DnaJ (Hsp40) homolog, subfamily B, member 4	Q5XIP0_RAT	7	-13.5382	0.864618
PD7 / VD7	Q9JMB5	Q9JMB5	NaN	NaN	0.0422603	0.157692	8	Q9JMB5	Adrm1	Proteasomal ubiquitin receptor ADRM1	ADRM1_RAT	1	NaN	NaN
PD7 / VD7	A0A0G2JZZ3;D3ZD47	A0A0G2JZZ3;D3ZD47	0.0515676	0.0515676	0.0343655	0.141649	12	A0A0G2JZZ3;D3ZD47	Ctif	Cap-binding complex-dependent translation initiation factor	A0A0G2JZZ3_RAT;D3ZD47_RAT	2	3.63904	1.03639
PD7 / VD7	B1H267	B1H267	0.0268788	0.0268788	0.0345013	0.141968	44	B1H267	Snx5	Sorting nexin-5	SNX5_RAT	10	1.88056	1.01881
PD7 / VD7	D4AA63	D4AA63	-0.62789	0.62789	0.0346058	0.142158	16	D4AA63	Ubqln2	Ubiquilin 2	D4AA63_RAT	4	-35.2878	0.647122
PD7 / VD7	P11730	P11730	-0.209329	0.209329	0.0348412	0.142644	52	P11730	Camk2g	Calcium/calmodulin-dependent protein kinase type II subunit gamma	KCC2G_RAT	10	-13.5061	0.864939
PD7 / VD7	D4A5L9;P62898	D4A5L9;P62898	-0.0849153	0.0849153	0.0348	0.142644	32	D4A5L9;P62898	;Cycs	Uncharacterized protein;Cytochrome c, somatic	D4A5L9_RAT;CYC_RAT	4	-5.71601	0.94284
PD7 / VD7	P21818	P21818	-0.469473	0.469473	0.0349838	0.142988	36	P21818	Stmn2	Stathmin-2	STMN2_RAT	7	-27.7771	0.722229
PD7 / VD7	P10499	P10499	-0.342328	0.342328	0.0350592	0.143056	28	P10499	Kcna1	Potassium voltage-gated channel subfamily A member 1	KCNA1_RAT	7	-21.1233	0.788767
PD7 / VD7	B2GV74	B2GV74	-0.0186039	0.0186039	0.0353318	0.143927	68	B2GV74	Klc2	Kinesin light chain 2	B2GV74_RAT	12	-1.28125	0.987188
PD7 / VD7	P60669	P60669	0.0854796	0.0854796	0.035636	0.144007	68	P60669	Plekha4	Pleckstrin homology domain-containing family A member 4	PKHA4_RAT	15	6.10404	1.06104
PD7 / VD7	P50503	P50503	-0.206151	0.206151	0.035613	0.144007	60	P50503	St13	Hsc70-interacting protein	F10A1_RAT	10	-13.3153	0.866847
PD7 / VD7	Q66X93	Q66X93	0.226182	0.226182	0.0355812	0.144007	160	Q66X93	Snd1	Staphylococcal nuclease domain-containing protein 1	SND1_RAT	32	16.9735	1.16973
PD7 / VD7	D4A830	D4A830	-0.159655	0.159655	0.035647	0.144007	44	D4A830	Ppa2	Pyrophosphatase (inorganic) 2	D4A830_RAT	10	-10.4761	0.895239
PD7 / VD7	Q66H09	Q66H09	-0.284081	0.284081	0.035448	0.144007	20	Q66H09	Ttc1	Tetratricopeptide repeat domain 1	Q66H09_RAT	4	-17.8735	0.821265
PD7 / VD7	Q3T1G7	Q3T1G7	-1.04291	1.04291	0.0358148	0.144445	16	Q3T1G7	Cog7	Conserved oligomeric Golgi complex subunit 7	COG7_RAT	4	-51.4652	0.485348
PD7 / VD7	Q6PDW1	Q6PDW1	-0.0360838	0.0360838	0.0361826	0.144608	52	Q6PDW1	Rps12	40S ribosomal protein S12	Q6PDW1_RAT	8	-2.47012	0.975299
PD7 / VD7	Q5XHY7	Q5XHY7	NaN	NaN	0.0455378	0.165321	4	Q5XHY7	Stam2	Signal transducing adapter molecule 2	STAM2_RAT	1	NaN	NaN
PD7 / VD7	G3V7Q7	G3V7Q7	0.130011	0.130011	0.0362113	0.144608	208	G3V7Q7	Iqgap1	IQ motif containing GTPase activating protein 1 (Predicted), isoform CRA_b	G3V7Q7_RAT	46	9.43017	1.0943
PD7 / VD7	P32551	P32551	0.149432	0.149432	0.036132	0.144608	88	P32551	Uqcrc2	Cytochrome b-c1 complex subunit 2, mitochondrial	QCR2_RAT	15	10.9133	1.10913
PD7 / VD7	A0A0G2K5P7;Q64611	A0A0G2K5P7;Q64611	-0.222151	0.222151	0.0359221	0.144608	24	A0A0G2K5P7;Q64611	Csad	Cysteine sulfinic acid decarboxylase	A0A0G2K5P7_RAT;CSAD_RAT	6	-14.2714	0.857286
PD7 / VD7	A0A0H2UHF6;Q9ES40	A0A0H2UHF6;Q9ES40	-0.609622	0.609622	0.0359824	0.144608	24	A0A0H2UHF6;Q9ES40	Arl6ip5	PRA1 family protein;PRA1 family protein 3	A0A0H2UHF6_RAT;PRAF3_RAT	4	-34.4632	0.655368
PD7 / VD7	A0A0G2K7B6	A0A0G2K7B6	-0.189822	0.189822	0.0361423	0.144608	60	A0A0G2K7B6	Dysf	Dysferlin	A0A0G2K7B6_RAT	15	-12.3286	0.876714
PD7 / VD7	A0A0H2UI21;Q704S8	A0A0H2UI21;Q704S8	-0.0836323	0.0836323	0.0363234	0.144818	32	A0A0H2UI21;Q704S8	Crat	Carnitine O-acetyltransferase	A0A0H2UI21_RAT;CACP_RAT	8	-5.63213	0.943679
PD7 / VD7	G3V8D2	G3V8D2	0.210127	0.210127	0.0364009	0.14489	52	G3V8D2	Prx	Periaxin	G3V8D2_RAT	7	15.679	1.15679
PD7 / VD7	P67779	P67779	0.00847616	0.00847616	0.0365109	0.14509	64	P67779	Phb	Prohibitin	PHB_RAT	12	0.589252	1.00589
PD7 / VD7	F1LM47	F1LM47	0.0768467	0.0768467	0.0366477	0.145397	81	F1LM47	Sucla2	Succinate--CoA ligase [ADP-forming] subunit beta, mitochondrial	F1LM47_RAT	17	5.47102	1.05471
PD7 / VD7	Q566E4	Q566E4	0.0283997	0.0283997	0.0369747	0.146218	64	Q566E4	Hnrnpr	Heterogeneous nuclear ribonucleoprotein R	Q566E4_RAT	14	1.98802	1.01988
PD7 / VD7	G3V9N7	G3V9N7	-0.237817	0.237817	0.0373369	0.147172	24	G3V9N7	Pacsin3	Protein kinase C and casein kinase substrate in neurons 3	G3V9N7_RAT	5	-15.1972	0.848028
PD7 / VD7	P05065	P05065	0.222088	0.222088	0.0377304	0.148347	132	P05065	Aldoa	Fructose-bisphosphate aldolase A	ALDOA_RAT	19	16.642	1.16642
PD7 / VD7	F2Z3T9	F2Z3T9	-0.237108	0.237108	0.0377994	0.148347	52	F2Z3T9	U2af2	U2 snRNP auxiliary factor large subunit	F2Z3T9_RAT	9	-15.1556	0.848444
PD7 / VD7	D4A7H1	D4A7H1	NaN	NaN	0.0473401	0.168351	4	D4A7H1	Slc9a9	Sodium/hydrogen exchanger	D4A7H1_RAT	1	NaN	NaN
PD7 / VD7	D3ZP15	D3ZP15	-0.556105	0.556105	0.0378175	0.148347	16	D3ZP15	Rab9b	RAB9B, member RAS oncogene family	D3ZP15_RAT	4	-31.9864	0.680136
PD7 / VD7	A0A0G2K3W1	A0A0G2K3W1	-0.389793	0.389793	0.0381501	0.149411	28	A0A0G2K3W1	Vwa8	von Willebrand factor A domain-containing 8	A0A0G2K3W1_RAT	7	-23.6761	0.763239
PD7 / VD7	Q68FY4	Q68FY4	0.139641	0.139641	0.0382443	0.149539	136	Q68FY4	Gc	Group specific component	Q68FY4_RAT	27	10.1631	1.10163
PD7 / VD7	Q641Y8	Q641Y8	0.107758	0.107758	0.0384103	0.149948	128	Q641Y8	Ddx1	ATP-dependent RNA helicase DDX1	DDX1_RAT	23	7.7552	1.07755
PD7 / VD7	P19945	P19945	-0.103405	0.103405	0.0386665	0.150466	76	P19945	Rplp0	60S acidic ribosomal protein P0	RLA0_RAT	12	-6.91665	0.930833
PD7 / VD7	Q9EPF2	Q9EPF2	-0.0429614	0.0429614	0.0386362	0.150466	56	Q9EPF2	Mcam	Cell surface glycoprotein MUC18	MUC18_RAT	12	-2.93395	0.97066
PD7 / VD7	F1LPQ9;Q5U301	F1LPQ9;Q5U301	-0.977214	0.977214	0.0387937	0.15072	16	F1LPQ9;Q5U301	Akap2	A-kinase anchor protein 2	F1LPQ9_RAT;AKAP2_RAT	3	-49.204	0.50796
PD7 / VD7	Q3KR59	Q3KR59	NaN	NaN	0.0486014	0.170926	4	Q3KR59	Usp10	Ubiquitin carboxyl-terminal hydrolase 10	UBP10_RAT	1	NaN	NaN
PD7 / VD7	G3V7H3;P32038	G3V7H3;P32038	-0.461717	0.461717	0.0393507	0.152641	12	G3V7H3;P32038	Cfd	Complement factor D	G3V7H3_RAT;CFAD_RAT	3	-27.3878	0.726122
PD7 / VD7	G3V6H5	G3V6H5	0.0649012	0.0649012	0.0395281	0.152962	56	G3V6H5	Slc25a11	Mitochondrial 2-oxoglutarate/malate carrier protein	G3V6H5_RAT	13	4.60133	1.04601
PD7 / VD7	Q9EPH8	Q9EPH8	-0.195741	0.195741	0.0395592	0.152962	128	Q9EPH8	Pabpc1	Polyadenylate-binding protein 1	PABP1_RAT	23	-12.6876	0.873124
PD7 / VD7	P23928	P23928	-0.0578833	0.0578833	0.0396283	0.152987	64	P23928	Cryab	Alpha-crystallin B chain	CRYAB_RAT	9	-3.93275	0.960673
PD7 / VD7	P62718	P62718	0.092232	0.092232	0.0400203	0.154256	28	P62718	Rpl18a	60S ribosomal protein L18a	RL18A_RAT	6	6.60181	1.06602
PD7 / VD7	D4A9D6	D4A9D6	0.042579	0.042579	0.0404125	0.155276	152	D4A9D6	Dhx9	DEAH (Asp-Glu-Ala-His) box polypeptide 9 (Predicted)	D4A9D6_RAT	31	2.99533	1.02995
PD7 / VD7	Q5XIH1	Q5XIH1	-0.0555561	0.0555561	0.0413007	0.156277	72	Q5XIH1	Aspn	Asporin	Q5XIH1_RAT	13	-3.77765	0.962223
PD7 / VD7	D3ZQ59;G3V700;P47245	D3ZQ59;G3V700;P47245	-0.151654	0.151654	0.0411581	0.156277	32	D3ZQ59;G3V700;P47245	Nrdc	Nardilysin	D3ZQ59_RAT;G3V700_RAT;NRDC_RAT	8	-9.97823	0.900218
PD7 / VD7	F1LPS8	F1LPS8	0.127212	0.127212	0.0411919	0.156277	60	F1LPS8	Pura	Transcriptional activator protein Pur-alpha	F1LPS8_RAT	8	9.21812	1.09218
PD7 / VD7	D3ZNZ9;D4A817;M0RBQ5	D3ZNZ9;D4A817;M0RBQ5	-0.190136	0.190136	0.0412096	0.156277	12	D3ZNZ9;D4A817;M0RBQ5	Hist3h2ba;Hist2h2be;Hist3h2bb	Histone H2B	D3ZNZ9_RAT;D4A817_RAT;M0RBQ5_RAT	2	-12.3477	0.876523
PD7 / VD7	Q642A6	Q642A6	0.131382	0.131382	0.0410152	0.156277	80	Q642A6	Vwa1	von Willebrand factor A domain-containing protein 1	VWA1_RAT	13	9.53425	1.09534
PD7 / VD7	Q6IRJ7	Q6IRJ7	-0.0258642	0.0258642	0.040753	0.156277	60	Q6IRJ7	Anxa7	Annexin	Q6IRJ7_RAT	12	-1.7768	0.982232
PD7 / VD7	Q71UF4	Q71UF4	-0.205477	0.205477	0.0409263	0.156277	40	Q71UF4	Rbbp7	Histone-binding protein RBBP7	RBBP7_RAT	6	-13.2748	0.867252
PD7 / VD7	A0A0G2KA25;Q4KLL4	A0A0G2KA25;Q4KLL4	-0.712156	0.712156	0.0413147	0.156277	16	A0A0G2KA25;Q4KLL4	Tm9sf4	Transmembrane 9 superfamily member;Transmembrane 9 superfamily member 4	A0A0G2KA25_RAT;TM9S4_RAT	4	-38.9593	0.610407
PD7 / VD7	Q5M891;Q63514	Q5M891;Q63514	0.69849	0.69849	0.0410219	0.156277	24	Q5M891;Q63514	C4bpa	C4b-binding protein alpha chain	Q5M891_RAT;C4BPA_RAT	6	62.2805	1.6228
PD7 / VD7	F1M5W8;M0R484	F1M5W8;M0R484	-0.159134	0.159134	0.041101	0.156277	40	F1M5W8;M0R484	Afap1l2	Actin filament-associated protein 1-like 2	F1M5W8_RAT;M0R484_RAT	10	-10.4437	0.895563
PD7 / VD7	P81799	P81799	-0.251412	0.251412	0.0414089	0.156391	28	P81799	Nagk	N-acetyl-D-glucosamine kinase	NAGK_RAT	6	-15.9926	0.840074
PD7 / VD7	Q4V8F9	Q4V8F9	-0.111751	0.111751	0.0418002	0.157381	56	Q4V8F9	Hsdl2	Hydroxysteroid dehydrogenase-like protein 2	HSDL2_RAT	13	-7.45356	0.925464
PD7 / VD7	A0A0G2JU15;D3ZGM1	A0A0G2JU15;D3ZGM1	-0.751889	0.751889	0.0418675	0.157391	16	A0A0G2JU15;D3ZGM1	Ptcd3	Pentatricopeptide repeat domain 3	A0A0G2JU15_RAT;D3ZGM1_RAT	4	-40.6174	0.593826
PD7 / VD7	Q64548	Q64548	0.132951	0.132951	0.0421263	0.157692	84	Q64548	Rtn1	Reticulon-1	RTN1_RAT	17	9.65347	1.09653
PD7 / VD7	D3ZKI0;F1M9F3	D3ZKI0;F1M9F3	NaN	NaN	0.0509859	0.173709	8	D3ZKI0;F1M9F3	NaN	Uncharacterized protein (Fragment);Uncharacterized protein	D3ZKI0_RAT;F1M9F3_RAT	1	NaN	NaN
PD7 / VD7	P01015	P01015	-0.019091	0.019091	0.0423522	0.157692	32	P01015	Agt	Angiotensinogen	ANGT_RAT	7	-1.31457	0.986854
PD7 / VD7	Q6P9V6	Q6P9V6	-0.00388679	0.00388679	0.0424008	0.157692	52	Q6P9V6	Psma5	Proteasome subunit alpha type	Q6P9V6_RAT	10	-0.269049	0.99731
PD7 / VD7	A0A0U1RVI9;P27952	A0A0U1RVI9;P27952	-0.0688082	0.0688082	0.0422449	0.157692	56	A0A0U1RVI9;P27952	rCG_34378;Rps2	RCG34378, isoform CRA_h;40S ribosomal protein S2	A0A0U1RVI9_RAT;RS2_RAT	11	-4.65747	0.953425
PD7 / VD7	D4A3T0	D4A3T0	-0.710516	0.710516	0.0421325	0.157692	8	D4A3T0	Sos1	SOS Ras/Rac guanine nucleotide exchange factor 1	D4A3T0_RAT	2	-38.8899	0.611101
PD7 / VD7	B2GV57	B2GV57	-0.42122	0.42122	0.0423926	0.157692	8	B2GV57	Cars2	Cysteinyl-tRNA synthetase 2, mitochondrial	B2GV57_RAT	2	-25.3207	0.746793
PD7 / VD7	D3ZE17;Q8VHK2	D3ZE17;Q8VHK2	0.617703	0.617703	0.042704	0.158578	28	D3ZE17;Q8VHK2	Caskin1	Caskin-1	D3ZE17_RAT;CSKI1_RAT	7	53.4431	1.53443
PD7 / VD7	B2RYX0;M0R9L0	B2RYX0;M0R9L0	0.213021	0.213021	0.042863	0.158926	32	B2RYX0;M0R9L0	Naca	Naca protein;Nascent polypeptide-associated complex subunit alpha	B2RYX0_RAT;M0R9L0_RAT	5	15.9113	1.15911
PD7 / VD7	A0A0G2K4X8;Q6PEC4	A0A0G2K4X8;Q6PEC4	-0.041768	0.041768	0.042935	0.158951	52	A0A0G2K4X8;Q6PEC4	Skp1	S-phase kinase-associated protein 1	A0A0G2K4X8_RAT;SKP1_RAT	10	-2.85363	0.971464
PD7 / VD7	P01830	P01830	0.226452	0.226452	0.0432055	0.159709	40	P01830	Thy1	Thy-1 membrane glycoprotein	THY1_RAT	5	16.9955	1.16995
PD7 / VD7	G3V6P2;Q01205	G3V6P2;Q01205	-0.108899	0.108899	0.0432997	0.159735	68	G3V6P2;Q01205	Dlst	Dihydrolipoamide S-succinyltransferase (E2 component of 2-oxo-glutarate complex), isoform CRA_a;Dihydrolipoyllysine-residue succinyltransferase component of 2-oxoglutarate dehydrogenase complex, mitochondrial	G3V6P2_RAT;ODO2_RAT	12	-7.27045	0.927295
PD7 / VD7	Q4KLZ6	Q4KLZ6	-0.250816	0.250816	0.0433436	0.159735	32	Q4KLZ6	Tkfc	Triokinase/FMN cyclase	TKFC_RAT	8	-15.9579	0.840421
PD7 / VD7	Q78P75	Q78P75	-0.130055	0.130055	0.043524	0.160158	40	Q78P75	Dynll2	Dynein light chain 2, cytoplasmic	DYL2_RAT	5	-8.62031	0.913797
PD7 / VD7	Q5XIA5	Q5XIA5	-0.234314	0.234314	0.0437316	0.160679	24	Q5XIA5	Coasy	Coenzyme A synthase	Q5XIA5_RAT	6	-14.9911	0.850089
PD7 / VD7	F1M403	F1M403	0.234747	0.234747	0.0439807	0.161351	120	F1M403	Ube2o	Ubiquitin-conjugating enzyme E2O	F1M403_RAT	25	17.6701	1.1767
PD7 / VD7	F1LMD9;P97874	F1LMD9;P97874	-0.426932	0.426932	0.0441712	0.161806	16	F1LMD9;P97874	Gak	Cyclin-G-associated kinase	F1LMD9_RAT;GAK_RAT	4	-25.6158	0.743842
PD7 / VD7	G3V7W1	G3V7W1	-0.233977	0.233977	0.0449442	0.16439	20	G3V7W1	Pdcd6	Programmed cell death protein 6	PDCD6_RAT	5	-14.9712	0.850288
PD7 / VD7	A0A0G2JSR9;Q91ZS3	A0A0G2JSR9;Q91ZS3	-0.460147	0.460147	0.0450331	0.164469	16	A0A0G2JSR9;Q91ZS3	Sdf4	45 kDa calcium-binding protein	A0A0G2JSR9_RAT;CAB45_RAT	4	-27.3088	0.726912
PD7 / VD7	D4A3V2	D4A3V2	-0.428186	0.428186	0.0453192	0.164909	32	D4A3V2	Ndufa6	NADH dehydrogenase [ubiquinone] 1 alpha subcomplex subunit 6	D4A3V2_RAT	5	-25.6804	0.743196
PD7 / VD7	Q641Z9	Q641Z9	-0.105215	0.105215	0.0453567	0.164909	16	Q641Z9	Sdhc	Succinate dehydrogenase complex subunit C	Q641Z9_RAT	3	-7.03334	0.929667
PD7 / VD7	Q5RJR8	Q5RJR8	0.301399	0.301399	0.0453128	0.164909	52	Q5RJR8	Lrrc59	Leucine-rich repeat-containing protein 59	LRC59_RAT	9	23.2339	1.23234
PD7 / VD7	B5DFB2	B5DFB2	-0.15114	0.15114	0.0460512	0.166936	48	B5DFB2	Rbbp4	RB-binding protein 4, chromatin-remodeling factor	B5DFB2_RAT	10	-9.94614	0.900539
PD7 / VD7	G3V8B6	G3V8B6	-0.0788429	0.0788429	0.0462108	0.167265	156	G3V8B6	Psmd1	26S proteasome non-ATPase regulatory subunit 1	G3V8B6_RAT	29	-5.31833	0.946817
PD7 / VD7	D3ZGY2	D3ZGY2	-0.0898289	0.0898289	0.0463869	0.167487	24	D3ZGY2	Otud6b	OTU domain-containing 6B	D3ZGY2_RAT	6	-6.03658	0.939634
PD7 / VD7	D3ZQL1	D3ZQL1	-0.417714	0.417714	0.046616	0.167487	24	D3ZQL1	Emc7	ER membrane protein complex subunit 7	D3ZQL1_RAT	4	-25.139	0.74861
PD7 / VD7	D3ZPP2	D3ZPP2	-0.0363088	0.0363088	0.0464909	0.167487	72	D3ZPP2	Arl8a	ADP-ribosylation factor-like GTPase 8A	D3ZPP2_RAT	10	-2.48533	0.975147
PD7 / VD7	D4A1Q9	D4A1Q9	-0.141984	0.141984	0.0466145	0.167487	32	D4A1Q9	Ttll12	Tubulin tyrosine ligase-like 12	D4A1Q9_RAT	8	-9.37278	0.906272
PD7 / VD7	F1M3H8	F1M3H8	-0.461209	0.461209	0.0464257	0.167487	24	F1M3H8	LOC681410	Hypothetical protein LOC681410	F1M3H8_RAT	5	-27.3623	0.726377
PD7 / VD7	A0A140TAF0	A0A140TAF0	-0.129957	0.129957	0.0469493	0.167555	24	A0A140TAF0	Tpm3	RCG62531, isoform CRA_g	A0A140TAF0_RAT	5	-8.61412	0.913859
PD7 / VD7	A0A0G2JSH2;P29147	A0A0G2JSH2;P29147	-0.060448	0.060448	0.0468097	0.167555	24	A0A0G2JSH2;P29147	Bdh1	3-hydroxybutyrate dehydrogenase, type 1, isoform CRA_a;D-beta-hydroxybutyrate dehydrogenase, mitochondrial	A0A0G2JSH2_RAT;BDH_RAT	5	-4.10337	0.958966
PD7 / VD7	B2RZ74	B2RZ74	-0.0949868	0.0949868	0.0467203	0.167555	40	B2RZ74	Snrnp70	Small nuclear ribonucleoprotein U1 subunit 70	B2RZ74_RAT	7	-6.37192	0.936281
PD7 / VD7	A0A0G2K249;Q5RKH1	A0A0G2K249;Q5RKH1	NaN	NaN	0.054862	0.179832	4	A0A0G2K249;Q5RKH1	Prpf4b	Serine/threonine-protein kinase PRP4 homolog	A0A0G2K249_RAT;PRP4B_RAT	1	NaN	NaN
PD7 / VD7	P32089	P32089	0.00453854	0.00453854	0.0470475	0.167555	24	P32089	Slc25a1	Tricarboxylate transport protein, mitochondrial	TXTP_RAT	6	0.315083	1.00315
PD7 / VD7	P61023	P61023	-0.437628	0.437628	0.0470226	0.167555	16	P61023	Chp1	Calcineurin B homologous protein 1	CHP1_RAT	4	-26.1652	0.738348
PD7 / VD7	O88350	O88350	-1.05901	1.05901	0.0468914	0.167555	16	O88350	Rbbp9	Putative hydrolase RBBP9	RBBP9_RAT	3	-52.0038	0.479962
PD7 / VD7	D4A8N1	D4A8N1	-0.0838626	0.0838626	0.0476036	0.168795	20	D4A8N1	Dpm1	Dolichol-phosphate mannosyltransferase subunit 1	D4A8N1_RAT	5	-5.64719	0.943528
PD7 / VD7	D3ZUM2	D3ZUM2	-1.99289	1.99289	0.0475814	0.168795	60	D3ZUM2	Sarm1	Sterile alpha and TIR motif containing 1 (Predicted)	D3ZUM2_RAT	15	-74.8766	0.251234
PD7 / VD7	P20767	P20767	0.0742167	0.0742167	0.0483923	0.170926	24	P20767	NaN	Ig lambda-2 chain C region	LAC2_RAT	5	5.27893	1.05279
PD7 / VD7	G3V918	G3V918	0.307119	0.307119	0.048615	0.170926	104	G3V918	Gart	Trifunctional purine biosynthetic protein adenosine-3	G3V918_RAT	22	23.7235	1.23723
PD7 / VD7	Q99MI5	Q99MI5	-0.181359	0.181359	0.0483535	0.170926	16	Q99MI5	LOC100912604	Spermidine synthase	Q99MI5_RAT	4	-11.8128	0.881872
PD7 / VD7	F1LQ22	F1LQ22	-0.306421	0.306421	0.0486255	0.170926	12	F1LQ22	Use1	Unconventional SNARE in the ER 1	F1LQ22_RAT	3	-19.1355	0.808645
PD7 / VD7	B0K008;B5DFN1	B0K008;B5DFN1	-0.244361	0.244361	0.0484844	0.170926	16	B0K008;B5DFN1	Eif1;Eif1b	Eukaryotic translation initiation factor 1;Eukaryotic translation initiation factor 1B	B0K008_RAT;B5DFN1_RAT	3	-15.581	0.84419
PD7 / VD7	Q5HZA9	Q5HZA9	NaN	NaN	0.0572164	0.184364	4	Q5HZA9	Tmem126a	Transmembrane protein 126A	T126A_RAT	1	NaN	NaN
PD7 / VD7	D3ZBN0	D3ZBN0	-0.224341	0.224341	0.0487258	0.171032	24	D3ZBN0	Hist1h1b	Histone H1.5	H15_RAT	5	-14.4014	0.855986
PD7 / VD7	G3V7G0;Q9QXU8	G3V7G0;Q9QXU8	0.346674	0.346674	0.0490583	0.171951	88	G3V7G0;Q9QXU8	Dync1li1	Cytoplasmic dynein 1 light intermediate chain 1	G3V7G0_RAT;DC1L1_RAT	18	27.1626	1.27163
PD7 / VD7	P62138	P62138	-0.140049	0.140049	0.0491861	0.172151	68	P62138	Ppp1ca	Serine/threonine-protein phosphatase PP1-alpha catalytic subunit	PP1A_RAT	13	-9.25114	0.907489
PD7 / VD7	Q5BK63	Q5BK63	-0.0209852	0.0209852	0.0494885	0.172247	68	Q5BK63	Ndufa9	NADH dehydrogenase [ubiquinone] 1 alpha subcomplex subunit 9, mitochondrial	NDUA9_RAT	13	-1.44405	0.985559
PD7 / VD7	Q5U2S7	Q5U2S7	0.357148	0.357148	0.0492941	0.172247	92	Q5U2S7	Psmd3	Proteasome (Prosome, macropain) 26S subunit, non-ATPase, 3	Q5U2S7_RAT	18	28.0891	1.28089
PD7 / VD7	D3ZD09	D3ZD09	-0.260944	0.260944	0.0494457	0.172247	16	D3ZD09	Cox6b1	Cytochrome c oxidase subunit	D3ZD09_RAT	3	-16.5458	0.834542
PD7 / VD7	Q6AY09	Q6AY09	0.0438969	0.0438969	0.0494962	0.172247	40	Q6AY09	Hnrnph2	Heterogeneous nuclear ribonucleoprotein H2	HNRH2_RAT	6	3.08946	1.03089
PD7 / VD7	A0A0G2K8H6;A0A0H2UHL6;P00786	A0A0G2K8H6;A0A0H2UHL6;P00786	-0.758263	0.758263	0.0497312	0.172326	12	A0A0G2K8H6;A0A0H2UHL6;P00786	Ctsh	Pro-cathepsin H	A0A0G2K8H6_RAT;A0A0H2UHL6_RAT;CATH_RAT	2	-40.8792	0.591208
PD7 / VD7	D4AE02	D4AE02	0.142925	0.142925	0.0500844	0.172812	20	D4AE02	NaN	Uncharacterized protein	D4AE02_RAT	4	10.4141	1.10414
PD7 / VD7	D3ZIP8	D3ZIP8	0.154063	0.154063	0.0500768	0.172812	32	D3ZIP8	NaN	Uncharacterized protein	D3ZIP8_RAT	5	11.2699	1.1127
PD7 / VD7	D3ZE72	D3ZE72	-0.348408	0.348408	0.0499878	0.172812	16	D3ZE72	Metap1	Methionine aminopeptidase	D3ZE72_RAT	4	-21.455	0.78545
PD7 / VD7	A0A0G2K588;D4A917	A0A0G2K588;D4A917	0.277083	0.277083	0.0502342	0.17288	36	A0A0G2K588;D4A917	Ltbp4	Latent-transforming growth factor beta-binding protein 4	A0A0G2K588_RAT;D4A917_RAT	8	21.1742	1.21174
PD7 / VD7	Q4VBH2	Q4VBH2	-0.409675	0.409675	0.050246	0.17288	12	Q4VBH2	Trnt1	tRNA nucleotidyl transferase 1	Q4VBH2_RAT	3	-24.7207	0.752793
PD7 / VD7	A0A0H2UHQ1;F1LZX7;P24049	A0A0H2UHQ1;F1LZX7;P24049	0.0474099	0.0474099	0.0503907	0.173134	68	A0A0H2UHQ1;F1LZX7;P24049	Rpl17	60S ribosomal protein L17	A0A0H2UHQ1_RAT;F1LZX7_RAT;RL17_RAT	10	3.3408	1.03341
PD7 / VD7	P62076	P62076	-0.688994	0.688994	0.0504624	0.173136	8	P62076	Timm13	Mitochondrial import inner membrane translocase subunit Tim13	TIM13_RAT	2	-37.9714	0.620286
PD7 / VD7	F7F1Y3;Q793F9	F7F1Y3;Q793F9	-0.264599	0.264599	0.0506704	0.173361	28	F7F1Y3;Q793F9	Vps4a	Vacuolar protein sorting-associated protein 4A	F7F1Y3_RAT;VPS4A_RAT	6	-16.757	0.83243
PD7 / VD7	F7EV94;P11960	F7EV94;P11960	-0.00835501	0.00835501	0.0506156	0.173361	48	F7EV94;P11960	Bckdha	2-oxoisovalerate dehydrogenase subunit alpha;2-oxoisovalerate dehydrogenase subunit alpha, mitochondrial (Fragment)	F7EV94_RAT;ODBA_RAT	10	-0.577452	0.994225
PD7 / VD7	Q5U3Z7	Q5U3Z7	-0.000600889	0.000600889	0.0508281	0.173657	52	Q5U3Z7	Shmt2	Serine hydroxymethyltransferase	Q5U3Z7_RAT	12	-0.0416418	0.999584
PD7 / VD7	A0A096MJN4;A0A096MJT3;A0A096MJW0;A0A0G2JVC7;A0JN02;E9PST0	A0A096MJN4;A0A096MJT3;A0A096MJW0;A0A0G2JVC7;A0JN02;E9PST0	-0.537018	0.537018	0.0509796	0.173709	12	A0A096MJN4;A0A096MJT3;A0A096MJW0;A0A0G2JVC7;A0JN02;E9PST0	2020-09-04	Septin 4;Septin 4;Septin 4;Septin 4;Sept4 protein;Septin 4	A0A096MJN4_RAT;A0A096MJT3_RAT;A0A096MJW0_RAT;A0A0G2JVC7_RAT;A0JN02_RAT;E9PST0_RAT	2	-31.0806	0.689194
PD7 / VD7	Q99MZ8	Q99MZ8	0.0132977	0.0132977	0.0511601	0.174059	32	Q99MZ8	Lasp1	LIM and SH3 domain protein 1	LASP1_RAT	5	0.925987	1.00926
PD7 / VD7	F1LW74	F1LW74	-0.494962	0.494962	0.0513223	0.174324	96	F1LW74	Iqgap2	IQ motif-containing GTPase-activating protein 2	F1LW74_RAT	22	-29.0419	0.709581
PD7 / VD7	F1M1L9	F1M1L9	0.0399672	0.0399672	0.0513811	0.174324	16	F1M1L9	Cpne2	Copine 2	F1M1L9_RAT	4	2.80905	1.02809
PD7 / VD7	O08619	O08619	0.819168	0.819168	0.0515919	0.174407	52	O08619	F13a1	Coagulation factor XIII A chain	F13A_RAT	10	76.4388	1.76439
PD7 / VD7	Q99ML5	Q99ML5	0.132581	0.132581	0.0515622	0.174407	112	Q99ML5	Pcyox1	Prenylcysteine oxidase	PCYOX_RAT	18	9.62533	1.09625
PD7 / VD7	Q5U2Q7	Q5U2Q7	-0.416314	0.416314	0.0516204	0.174407	36	Q5U2Q7	Etf1	Eukaryotic peptide chain release factor subunit 1	ERF1_RAT	8	-25.0663	0.749337
PD7 / VD7	P62832	P62832	0.0546574	0.0546574	0.0517231	0.174475	44	P62832	Rpl23	60S ribosomal protein L23	RL23_RAT	7	3.86125	1.03861
PD7 / VD7	Q4V8B7	Q4V8B7	-0.24626	0.24626	0.0517838	0.174475	24	Q4V8B7	Hsdl1	Inactive hydroxysteroid dehydrogenase-like protein 1	HSDL1_RAT	5	-15.6921	0.843079
PD7 / VD7	P07340	P07340	0.193794	0.193794	0.0521107	0.175121	57	P07340	Atp1b1	Sodium/potassium-transporting ATPase subunit beta-1	AT1B1_RAT	11	14.3768	1.14377
PD7 / VD7	P00173	P00173	-0.379106	0.379106	0.0521194	0.175121	36	P00173	Cyb5a	Cytochrome b5	CYB5_RAT	5	-23.1086	0.768914
PD7 / VD7	A0A0G2KAW7;Q5XI72	A0A0G2KAW7;Q5XI72	0.139983	0.139983	0.0522974	0.175477	40	A0A0G2KAW7;Q5XI72	Eif4h	Eukaryotic translation initiation factor 4H	A0A0G2KAW7_RAT;IF4H_RAT	7	10.1892	1.10189
PD7 / VD7	O35550	O35550	0.551006	0.551006	0.0524609	0.175784	24	O35550	Rabep1	Rab GTPase-binding effector protein 1	RABE1_RAT	6	46.5107	1.46511
PD7 / VD7	G3V9Y1	G3V9Y1	0.334718	0.334718	0.0525554	0.175858	276	G3V9Y1	Myh10	Myosin, heavy polypeptide 10, non-muscle, isoform CRA_b	G3V9Y1_RAT	53	26.1131	1.26113
PD7 / VD7	D3ZVU4	D3ZVU4	NaN	NaN	0.0626069	0.193491	4	D3ZVU4	Rbks	Ribokinase	D3ZVU4_RAT	1	NaN	NaN
PD7 / VD7	G3V7I8;O08815	G3V7I8;O08815	0.246071	0.246071	0.0527029	0.17611	24	G3V7I8;O08815	Slk	RCG57812, isoform CRA_b;STE20-like serine/threonine-protein kinase	G3V7I8_RAT;SLK_RAT	5	18.5973	1.18597
PD7 / VD7	A0A096MJB3;M0R565	A0A096MJB3;M0R565	-0.769113	0.769113	0.0529146	0.176575	8	A0A096MJB3;M0R565	Wdr82	WD repeat domain 82 (Fragment);WD repeat domain 82	A0A096MJB3_RAT;M0R565_RAT	2	-41.3222	0.586778
PD7 / VD7	D3ZLT1	D3ZLT1	-0.0431171	0.0431171	0.053111	0.176668	40	D3ZLT1	Ndufb7	NADH dehydrogenase (Ubiquinone) 1 beta subcomplex, 7 (Predicted)	D3ZLT1_RAT	8	-2.94443	0.970556
PD7 / VD7	Q5U2X6	Q5U2X6	-0.197768	0.197768	0.05316	0.176668	64	Q5U2X6	Ccdc47	Coiled-coil domain-containing protein 47	CCD47_RAT	11	-12.8102	0.871898
PD7 / VD7	D3ZQ74;Q63321	D3ZQ74;Q63321	-0.670624	0.670624	0.0531247	0.176668	12	D3ZQ74;Q63321	Plod1	Procollagen-lysine, 2-oxoglutarate 5-dioxygenase 1;Procollagen-lysine,2-oxoglutarate 5-dioxygenase 1	D3ZQ74_RAT;PLOD1_RAT	3	-37.1765	0.628235
PD7 / VD7	P06761	P06761	0.255926	0.255926	0.0534498	0.177334	208	P06761	Hspa5	Endoplasmic reticulum chaperone BiP	BIP_RAT	29	19.4102	1.1941
PD7 / VD7	G3V790;Q8K1P7	G3V790;Q8K1P7	-0.328241	0.328241	0.0535061	0.177334	24	G3V790;Q8K1P7	Smarca4	Transcription activator BRG1	G3V790_RAT;SMCA4_RAT	6	-20.3493	0.796507
PD7 / VD7	B5DFE0	B5DFE0	0.087247	0.087247	0.053713	0.177661	80	B5DFE0	Mpp6	Membrane palmitoylated protein 6	B5DFE0_RAT	17	6.2341	1.06234
PD7 / VD7	A0A0G2K132	A0A0G2K132	-0.603754	0.603754	0.0537944	0.177661	20	A0A0G2K132	Fmnl2	Formin-like 2	A0A0G2K132_RAT	5	-34.196	0.65804
PD7 / VD7	Q5XIF5	Q5XIF5	-0.743179	0.743179	0.0538233	0.177661	8	Q5XIF5	Degs1	Sphingolipid delta(4)-desaturase DES1	DEGS1_RAT	2	-40.2579	0.597421
PD7 / VD7	P38659	P38659	0.180308	0.180308	0.0541539	0.17851	140	P38659	Pdia4	Protein disulfide-isomerase A4	PDIA4_RAT	23	13.3126	1.13313
PD7 / VD7	P62332	P62332	-0.080256	0.080256	0.0543842	0.179027	28	P62332	Arf6	ADP-ribosylation factor 6	ARF6_RAT	6	-5.41102	0.94589
PD7 / VD7	Q9R1T5	Q9R1T5	-0.0299877	0.0299877	0.0548672	0.179832	68	Q9R1T5	Aspa	Aspartoacylase	ACY2_RAT	13	-2.05714	0.979429
PD7 / VD7	P36876	P36876	0.195555	0.195555	0.0549979	0.179832	72	P36876	Ppp2r2a	Serine/threonine-protein phosphatase 2A 55 kDa regulatory subunit B alpha isoform	2ABA_RAT	15	14.5165	1.14516
PD7 / VD7	Q68FR8	Q68FR8	-0.0568823	0.0568823	0.0548367	0.179832	32	Q68FR8	Tuba3a	Tubulin alpha-3 chain	TBA3_RAT	4	-3.86607	0.961339
PD7 / VD7	P29419	P29419	-0.257693	0.257693	0.054997	0.179832	16	P29419	Atp5me	ATP synthase subunit e, mitochondrial	ATP5I_RAT	3	-16.3576	0.836424
PD7 / VD7	A0A0G2K743;D3Z8D7;P62856	A0A0G2K743;D3Z8D7;P62856	0.298018	0.298018	0.0552089	0.18028	20	A0A0G2K743;D3Z8D7;P62856	RGD1562415;LOC100361854;Rps26	40S ribosomal protein S26	A0A0G2K743_RAT;D3Z8D7_RAT;RS26_RAT	3	22.9454	1.22945
PD7 / VD7	A0A0G2K6E0	A0A0G2K6E0	-0.27051	0.27051	0.0554522	0.180832	8	A0A0G2K6E0	Rhoc	Ras homolog family member C	A0A0G2K6E0_RAT	2	-17.0974	0.829026
PD7 / VD7	D3ZWQ8;Q5XXR3	D3ZWQ8;Q5XXR3	NaN	NaN	0.065412	0.197434	4	D3ZWQ8;Q5XXR3	Arhgef6	Rho guanine nucleotide exchange factor 6	D3ZWQ8_RAT;ARHG6_RAT	1	NaN	NaN
PD7 / VD7	Q8CG45	Q8CG45	0.128902	0.128902	0.0555478	0.180902	32	Q8CG45	Akr7a2	Aflatoxin B1 aldehyde reductase member 2	ARK72_RAT	7	9.3461	1.09346
PD7 / VD7	B0BN81	B0BN81	-0.275027	0.275027	0.0559152	0.181613	48	B0BN81	Rps5	40S ribosomal protein S5	B0BN81_RAT	7	-17.3565	0.826435
PD7 / VD7	F1M4A4	F1M4A4	0.102834	0.102834	0.0558606	0.181613	132	F1M4A4	Kif1a	Kinesin family member 1A	F1M4A4_RAT	28	7.38812	1.07388
PD7 / VD7	Q6P7S1	Q6P7S1	-0.226783	0.226783	0.0562616	0.182252	44	Q6P7S1	Asah1	Acid ceramidase	ASAH1_RAT	11	-14.5462	0.854538
PD7 / VD7	P42667;Q6P9X2	P42667;Q6P9X2	NaN	NaN	0.0662975	0.198648	4	P42667;Q6P9X2	Sec11a	Signal peptidase complex catalytic subunit SEC11A;Signal peptidase complex catalytic subunit SEC11	SC11A_RAT;Q6P9X2_RAT	1	NaN	NaN
PD7 / VD7	G3V6E8;Q9R1J4	G3V6E8;Q9R1J4	-0.011291	0.011291	0.0562515	0.182252	32	G3V6E8;Q9R1J4	Myoc	Myocilin	G3V6E8_RAT;MYOC_RAT	7	-0.779578	0.992204
PD7 / VD7	F1LMQ3	F1LMQ3	-0.24867	0.24867	0.0565458	0.182929	28	F1LMQ3	Psmd8	Proteasome 26S subunit, non-ATPase 8	F1LMQ3_RAT	6	-15.8328	0.841672
PD7 / VD7	Q56R18	Q56R18	-0.288922	0.288922	0.0566902	0.183153	24	Q56R18	Kpna3	Importin subunit alpha	Q56R18_RAT	5	-18.1486	0.818514
PD7 / VD7	A0A0H2UHU0;F1M6F4;P62853	A0A0H2UHU0;F1M6F4;P62853	-0.0673929	0.0673929	0.0570864	0.184189	24	A0A0H2UHU0;F1M6F4;P62853	Rps25;;Rps25	40S ribosomal protein S25;Uncharacterized protein;40S ribosomal protein S25	A0A0H2UHU0_RAT;F1M6F4_RAT;RS25_RAT	4	-4.56389	0.954361
PD7 / VD7	Q9R0T4	Q9R0T4	-0.238103	0.238103	0.057485	0.184492	48	Q9R0T4	Cdh1	Cadherin-1	CADH1_RAT	9	-15.214	0.84786
PD7 / VD7	O89049;R9PXU4	O89049;R9PXU4	0.164959	0.164959	0.057607	0.184492	52	O89049;R9PXU4	Txnrd1	Thioredoxin reductase 1, cytoplasmic;Thioredoxin reductase 1, cytoplasmic	TRXR1_RAT;R9PXU4_RAT	11	12.1134	1.12113
PD7 / VD7	P52631	P52631	0.0935762	0.0935762	0.0574341	0.184492	100	P52631	Stat3	Signal transducer and activator of transcription 3	STAT3_RAT	20	6.70119	1.06701
PD7 / VD7	Q9JMJ4	Q9JMJ4	-0.00533304	0.00533304	0.0576348	0.184492	72	Q9JMJ4	Prpf19	Pre-mRNA-processing factor 19	PRP19_RAT	13	-0.368976	0.99631
PD7 / VD7	P63090	P63090	-0.221052	0.221052	0.0573507	0.184492	16	P63090	Ptn	Pleiotrophin	PTN_RAT	3	-14.206	0.85794
PD7 / VD7	B0BN18	B0BN18	-0.450325	0.450325	0.0578318	0.18488	8	B0BN18	Pfdn2	Prefoldin subunit 2	PFD2_RAT	2	-26.8122	0.731878
PD7 / VD7	Q9JK64	Q9JK64	-0.584319	0.584319	0.0582635	0.186016	24	Q9JK64	Abcb1a	Multidrug resistance protein 1a	Q9JK64_RAT	6	-33.3036	0.666964
PD7 / VD7	Q05982	Q05982	-0.223731	0.223731	0.0589491	0.187223	28	Q05982	Nme1	Nucleoside diphosphate kinase A	NDKA_RAT	5	-14.3652	0.856348
PD7 / VD7	M0R7M8;Q3B8Q0	M0R7M8;Q3B8Q0	0.183885	0.183885	0.0589038	0.187223	68	M0R7M8;Q3B8Q0	;Mapre2	Uncharacterized protein;Microtubule-associated protein RP/EB family member 2	M0R7M8_RAT;MARE2_RAT	12	13.5939	1.13594
PD7 / VD7	B0BNA7	B0BNA7	0.103041	0.103041	0.0587536	0.187223	68	B0BNA7	Eif3i	Eukaryotic translation initiation factor 3 subunit I	EIF3I_RAT	14	7.40346	1.07403
PD7 / VD7	D3ZWW5	D3ZWW5	-0.235767	0.235767	0.0588167	0.187223	12	D3ZWW5	Slc30a9	RCG64242	D3ZWW5_RAT	3	-15.0767	0.849233
PD7 / VD7	D3ZV91	D3ZV91	-0.522267	0.522267	0.0591749	0.187695	12	D3ZV91	L3hypdh	Similar to RIKEN cDNA 2810055F11 (Predicted)	D3ZV91_RAT	3	-30.3723	0.696277
PD7 / VD7	A0A0G2KB07;Q6AY12	A0A0G2KB07;Q6AY12	0.00576876	0.00576876	0.0593411	0.187831	36	A0A0G2KB07;Q6AY12	Cyb5r2	NADH-cytochrome b5 reductase;NADH-cytochrome b5 reductase 2	A0A0G2KB07_RAT;NB5R2_RAT	8	0.40066	1.00401
PD7 / VD7	A0A0G2K6Z8	A0A0G2K6Z8	-0.475568	0.475568	0.0593719	0.187831	24	A0A0G2K6Z8	Plekha7	Pleckstrin homology domain-containing A7	A0A0G2K6Z8_RAT	5	-28.0817	0.719183
PD7 / VD7	A0A0G2K8Q1	A0A0G2K8Q1	NaN	NaN	0.0689727	0.203221	8	A0A0G2K8Q1	Apoc3	Apolipoprotein C-III	A0A0G2K8Q1_RAT	1	NaN	NaN
PD7 / VD7	Q4KLI7	Q4KLI7	-0.186506	0.186506	0.0596213	0.188375	36	Q4KLI7	Sf3a3	Splicing factor 3a, subunit 3	Q4KLI7_RAT	9	-12.1268	0.878732
PD7 / VD7	P69897	P69897	0.210495	0.210495	0.0598254	0.188775	40	P69897	Tubb5	Tubulin beta-5 chain	TBB5_RAT	5	15.7085	1.15709
PD7 / VD7	A0A0G2JWG6;G3V6A8	A0A0G2JWG6;G3V6A8	-0.0510048	0.0510048	0.060087	0.189356	48	A0A0G2JWG6;G3V6A8	Golgb1	Golgin B1;Golgi autoantigen, golgin subfamily b, macrogolgin 1, isoform CRA_c	A0A0G2JWG6_RAT;G3V6A8_RAT	10	-3.47362	0.965264
PD7 / VD7	P05708	P05708	0.0692423	0.0692423	0.0602103	0.189499	200	P05708	Hk1	Hexokinase-1	HXK1_RAT	39	4.91655	1.04917
PD7 / VD7	Q2PQA9	Q2PQA9	0.141662	0.141662	0.060491	0.189892	136	Q2PQA9	Kif5b	Kinesin-1 heavy chain	KINH_RAT	26	10.3175	1.10318
PD7 / VD7	D4A962	D4A962	-0.174852	0.174852	0.0604845	0.189892	44	D4A962	Hnrnpul1	Heterogeneous nuclear ribonucleoprotein U-like 1	D4A962_RAT	11	-11.4142	0.885858
PD7 / VD7	F1MA36;Q9QWN8	F1MA36;Q9QWN8	-0.204143	0.204143	0.0608999	0.190605	68	F1MA36;Q9QWN8	Sptbn2	Spectrin beta chain;Spectrin beta chain, non-erythrocytic 2	F1MA36_RAT;SPTN2_RAT	16	-13.1946	0.868054
PD7 / VD7	Q920Q0	Q920Q0	-0.11047	0.11047	0.0608127	0.190605	28	Q920Q0	Palm	Paralemmin-1	PALM_RAT	7	-7.37137	0.926286
PD7 / VD7	Q641Z8	Q641Z8	-0.669713	0.669713	0.060953	0.190605	8	Q641Z8	Pef1	Peflin	PEF1_RAT	2	-37.1368	0.628632
PD7 / VD7	Q6AY80	Q6AY80	0.0359886	0.0359886	0.0611199	0.190882	24	Q6AY80	Nqo2	Ribosyldihydronicotinamide dehydrogenase [quinone]	NQO2_RAT	5	2.52591	1.02526
PD7 / VD7	F1LUE2	F1LUE2	-0.103867	0.103867	0.0612575	0.191067	80	F1LUE2	Camk2b	Calcium/calmodulin-dependent protein kinase II, beta, isoform CRA_c	F1LUE2_RAT	15	-6.94649	0.930535
PD7 / VD7	F1LVV4	F1LVV4	-0.232563	0.232563	0.0616948	0.192185	24	F1LVV4	Rcc2	Regulator of chromosome condensation 2	F1LVV4_RAT	6	-14.8878	0.851122
PD7 / VD7	Q9EST6	Q9EST6	-0.238287	0.238287	0.0620523	0.192965	24	Q9EST6	Anp32b	Acidic leucine-rich nuclear phosphoprotein 32 family member B	AN32B_RAT	4	-15.2249	0.847751
PD7 / VD7	A0A0G2K7P9;A0A0G2K7R3;F1M8G9	A0A0G2K7P9;A0A0G2K7R3;F1M8G9	-0.158596	0.158596	0.0621037	0.192965	16	A0A0G2K7P9;A0A0G2K7R3;F1M8G9	Ncam2	Neural cell adhesion molecule 2	A0A0G2K7P9_RAT;A0A0G2K7R3_RAT;F1M8G9_RAT	4	-10.4103	0.895897
PD7 / VD7	A0A0G2JV65;P63102	A0A0G2JV65;P63102	-0.0101414	0.0101414	0.0622411	0.193146	72	A0A0G2JV65;P63102	Ywhaz	14-3-3 protein zeta/delta	A0A0G2JV65_RAT;1433Z_RAT	12	-0.70048	0.992995
PD7 / VD7	Q920A6	Q920A6	-0.19552	0.19552	0.06267	0.193491	44	Q920A6	Scpep1	Retinoid-inducible serine carboxypeptidase	RISC_RAT	8	-12.6742	0.873258
PD7 / VD7	F1LZJ4	F1LZJ4	-0.130332	0.130332	0.0624916	0.193491	32	F1LZJ4	Hyi	Putative hydroxypyruvate isomerase	F1LZJ4_RAT	8	-8.6379	0.913621
PD7 / VD7	P62628	P62628	-0.554426	0.554426	0.0625597	0.193491	12	P62628	Dynlrb1	Dynein light chain roadblock-type 1	DLRB1_RAT	3	-31.9072	0.680928
PD7 / VD7	A0A0G2K865;F1MAB9	A0A0G2K865;F1MAB9	-0.418013	0.418013	0.0629957	0.19425	24	A0A0G2K865;F1MAB9	Tpd52	Tumor protein D52	A0A0G2K865_RAT;F1MAB9_RAT	5	-25.1545	0.748455
PD7 / VD7	D4A4P3;M0RA24	D4A4P3;M0RA24	0.329855	0.329855	0.063085	0.19428	8	D4A4P3;M0RA24	Ndufb3;	NADH:ubiquinone oxidoreductase subunit B3;Uncharacterized protein	D4A4P3_RAT;M0RA24_RAT	2	25.6887	1.25689
PD7 / VD7	A0A0G2JSQ4	A0A0G2JSQ4	-0.228619	0.228619	0.0632537	0.194553	16	A0A0G2JSQ4	Tpm1	Tropomyosin 1, alpha, isoform CRA_p	A0A0G2JSQ4_RAT	3	-14.6549	0.853451
PD7 / VD7	A0A0G2JSH9	A0A0G2JSH9	0.140983	0.140983	0.0633572	0.194593	60	A0A0G2JSH9	Prdx2	Peroxiredoxin-2	A0A0G2JSH9_RAT	9	10.2656	1.10266
PD7 / VD7	M0RC57	M0RC57	-0.452805	0.452805	0.0635863	0.194593	20	M0RC57	Smap1	Small ArfGAP 1	M0RC57_RAT	4	-26.9379	0.730621
PD7 / VD7	A7VJC2;F1LNF1	A7VJC2;F1LNF1	0.0261032	0.0261032	0.0635083	0.194593	116	A7VJC2;F1LNF1	Hnrnpa2b1	Heterogeneous nuclear ribonucleoproteins A2/B1	ROA2_RAT;F1LNF1_RAT	16	1.82581	1.01826
PD7 / VD7	G3V741	G3V741	0.0389451	0.0389451	0.0635419	0.194593	64	G3V741	Slc25a3	Phosphate carrier protein, mitochondrial	G3V741_RAT	10	2.73623	1.02736
PD7 / VD7	D4IGX4;Q6EV76	D4IGX4;Q6EV76	-0.33763	0.33763	0.0638191	0.195061	12	D4IGX4;Q6EV76	Fut8	Alpha-(1,6)-fucosyltransferase (Fragment);Alpha-(1,6)-fucosyltransferase	D4IGX4_RAT;FUT8_RAT	3	-20.866	0.79134
PD7 / VD7	P86182	P86182	0.0423212	0.0423212	0.0640112	0.195403	24	P86182	Ccdc22	Coiled-coil domain-containing protein 22	CCD22_RAT	6	2.97693	1.02977
PD7 / VD7	F1LN59	F1LN59	0.0735561	0.0735561	0.0645068	0.196423	68	F1LN59	Eif4g2	Eukaryotic translation initiation factor 4, gamma 2	F1LN59_RAT	17	5.23073	1.05231
PD7 / VD7	D4A511	D4A511	-0.722035	0.722035	0.0644342	0.196423	8	D4A511	Srp9	Signal recognition particle 9 kDa protein	D4A511_RAT	2	-39.3758	0.606242
PD7 / VD7	P31399	P31399	-0.159806	0.159806	0.0646779	0.196698	60	P31399	Atp5pd	ATP synthase subunit d, mitochondrial	ATP5H_RAT	10	-10.4854	0.895146
PD7 / VD7	Q5XI34	Q5XI34	-0.0662345	0.0662345	0.0649658	0.197327	136	Q5XI34	Ppp2r1a	Protein phosphatase 2 (Formerly 2A), regulatory subunit A (PR 65), alpha isoform, isoform CRA_a	Q5XI34_RAT	22	-4.48723	0.955128
PD7 / VD7	D3ZF12	D3ZF12	-0.713255	0.713255	0.0653598	0.197434	12	D3ZF12	Spcs3	Signal peptidase complex subunit 3	D3ZF12_RAT	3	-39.0057	0.609943
PD7 / VD7	P06686	P06686	0.164902	0.164902	0.065612	0.197434	176	P06686	Atp1a2	Sodium/potassium-transporting ATPase subunit alpha-2	AT1A2_RAT	26	12.109	1.12109
PD7 / VD7	P08009	P08009	0.0350954	0.0350954	0.0656297	0.197434	52	P08009	Gstm3	Glutathione S-transferase Yb-3	GSTM4_RAT	9	2.46245	1.02462
PD7 / VD7	P21575	P21575	0.173715	0.173715	0.0655176	0.197434	140	P21575	Dnm1	Dynamin-1	DYN1_RAT	24	12.7959	1.12796
PD7 / VD7	M0R6J0	M0R6J0	NaN	NaN	0.074406	0.209226	4	M0R6J0	Mrpl39	Mitochondrial ribosomal protein L39	M0R6J0_RAT	1	NaN	NaN
PD7 / VD7	B2RYG6	B2RYG6	0.139467	0.139467	0.0656493	0.197434	64	B2RYG6	Otub1	Ubiquitin thioesterase OTUB1	OTUB1_RAT	11	10.1498	1.1015
PD7 / VD7	Q6EV70	Q6EV70	-0.509096	0.509096	0.0654375	0.197434	12	Q6EV70	Pofut1	GDP-fucose protein O-fucosyltransferase 1	OFUT1_RAT	3	-29.7338	0.702662
PD7 / VD7	A0A1W2Q6Q2	A0A1W2Q6Q2	0.0592597	0.0592597	0.0651125	0.197434	44	A0A1W2Q6Q2	Dclk1	Serine/threonine-protein kinase DCLK1	A0A1W2Q6Q2_RAT	10	4.1931	1.04193
PD7 / VD7	Q9WVJ4	Q9WVJ4	0.0881437	0.0881437	0.0657606	0.197525	16	Q9WVJ4	Synj2bp	Synaptojanin-2-binding protein	SYJ2B_RAT	3	6.30015	1.063
PD7 / VD7	E9PT22	E9PT22	-0.302615	0.302615	0.0659818	0.197945	60	E9PT22	Inf2	Uncharacterized protein	E9PT22_RAT	14	-18.9219	0.810781
PD7 / VD7	Q5U2V8	Q5U2V8	-0.0805207	0.0805207	0.0669102	0.200074	36	Q5U2V8	Emc3	ER membrane protein complex subunit 3	EMC3_RAT	6	-5.42837	0.945716
PD7 / VD7	G3V667	G3V667	0.410945	0.410945	0.0669865	0.200074	168	G3V667	Itga6	Integrin subunit alpha 6	G3V667_RAT	33	32.9557	1.32956
PD7 / VD7	D4A0C3	D4A0C3	-0.432735	0.432735	0.0670198	0.200074	16	D4A0C3	Hid1	HID1 domain-containing	D4A0C3_RAT	4	-25.9144	0.740856
PD7 / VD7	A0A0G2K7W8;F1M9G8;Q8K3P7	A0A0G2K7W8;F1M9G8;Q8K3P7	-0.250072	0.250072	0.0671892	0.200334	24	A0A0G2K7W8;F1M9G8;Q8K3P7	Hint3	Histidine triad nucleotide-binding protein 3	A0A0G2K7W8_RAT;F1M9G8_RAT;HINT3_RAT	5	-15.9145	0.840855
PD7 / VD7	Q3KRD5	Q3KRD5	0.146633	0.146633	0.0676918	0.201586	52	Q3KRD5	Tomm34	Mitochondrial import receptor subunit TOM34	TOM34_RAT	9	10.6983	1.10698
PD7 / VD7	Q9QY17	Q9QY17	0.27988	0.27988	0.0682667	0.202868	52	Q9QY17	Pacsin2	Protein kinase C and casein kinase substrate in neurons 2 protein	PACN2_RAT	11	21.4094	1.21409
PD7 / VD7	Q5RK25	Q5RK25	-0.2102	0.2102	0.0682888	0.202868	16	Q5RK25	Pmm1	Phosphomannomutase	Q5RK25_RAT	4	-13.5582	0.864418
PD7 / VD7	P16391	P16391	1.25453	1.25453	0.069156	0.203221	8	P16391	NaN	RT1 class I histocompatibility antigen, AA alpha chain	HA12_RAT	2	138.589	2.38589
PD7 / VD7	Q8R491	Q8R491	0.107865	0.107865	0.069075	0.203221	148	Q8R491	Ehd3	EH domain-containing protein 3	EHD3_RAT	29	7.76325	1.07763
PD7 / VD7	B4F7A3	B4F7A3	0.236651	0.236651	0.0693002	0.203221	12	B4F7A3	Lgalsl	Galectin	B4F7A3_RAT	2	17.8254	1.17825
PD7 / VD7	Q08877	Q08877	0.198447	0.198447	0.0686522	0.203221	136	Q08877	Dnm3	Dynamin-3	DYN3_RAT	25	14.7463	1.14746
PD7 / VD7	Q924S5	Q924S5	0.054972	0.054972	0.0686833	0.203221	120	Q924S5	Lonp1	Lon protease homolog, mitochondrial	LONM_RAT	25	3.8839	1.03884
PD7 / VD7	A0A097BW25;D3ZAF5	A0A097BW25;D3ZAF5	-0.45054	0.45054	0.0686113	0.203221	28	A0A097BW25;D3ZAF5	Postn	Periostin	A0A097BW25_RAT;D3ZAF5_RAT	6	-26.8231	0.731769
PD7 / VD7	G3V852	G3V852	0.225588	0.225588	0.0688	0.203221	473	G3V852	Tln1	RCG55135, isoform CRA_b	G3V852_RAT	83	16.9254	1.16925
PD7 / VD7	A0A0G2K9Q3	A0A0G2K9Q3	-0.263028	0.263028	0.0689479	0.203221	24	A0A0G2K9Q3	Naa25	N-alpha-acetyltransferase 25, NatB auxiliary subunit	A0A0G2K9Q3_RAT	6	-16.6663	0.833337
PD7 / VD7	D3ZRN5	D3ZRN5	-0.60305	0.60305	0.0692196	0.203221	12	D3ZRN5	Ro60	Ro60, Y RNA-binding protein	D3ZRN5_RAT	3	-34.1639	0.658361
PD7 / VD7	Q08013	Q08013	NaN	NaN	0.0777139	0.212709	8	Q08013	Ssr3	Translocon-associated protein subunit gamma	SSRG_RAT	1	NaN	NaN
PD7 / VD7	P13264	P13264	0.263092	0.263092	0.0698607	0.203335	112	P13264	Gls	Glutaminase kidney isoform, mitochondrial	GLSK_RAT	21	20.0048	1.20005
PD7 / VD7	F1LQ55;P11915	F1LQ55;P11915	-0.217082	0.217082	0.0696197	0.203335	72	F1LQ55;P11915	Scp2	Non-specific lipid-transfer protein	F1LQ55_RAT;NLTP_RAT	14	-13.9696	0.860304
PD7 / VD7	P0DN35	P0DN35	-0.413727	0.413727	0.0698652	0.203335	12	P0DN35	Ndufb1	NADH dehydrogenase [ubiquinone] 1 beta subcomplex subunit 1	NDUB1_RAT	2	-24.9318	0.750682
PD7 / VD7	F1LT49	F1LT49	0.121014	0.121014	0.069541	0.203335	40	F1LT49	Lrrc47	Leucine-rich repeat-containing 47	F1LT49_RAT	9	8.7499	1.0875
PD7 / VD7	A0A0G2K6J5	A0A0G2K6J5	-0.183308	0.183308	0.0697239	0.203335	44	A0A0G2K6J5	Myl6	Myosin light polypeptide 6	A0A0G2K6J5_RAT	8	-11.9319	0.880681
PD7 / VD7	P62919	P62919	0.0626037	0.0626037	0.0704191	0.204419	64	P62919	Rpl8	60S ribosomal protein L8	RL8_RAT	9	4.43488	1.04435
PD7 / VD7	A0A0G2K121;Q5FVQ4	A0A0G2K121;Q5FVQ4	0.00826634	0.00826634	0.0704893	0.204419	60	A0A0G2K121;Q5FVQ4	Mlec	Unc-119 lipid-binding chaperone B;Malectin	A0A0G2K121_RAT;MLEC_RAT	10	0.574624	1.00575
PD7 / VD7	D4ACM1	D4ACM1	-0.388887	0.388887	0.0703551	0.204419	12	D4ACM1	Elp3	Elongator complex protein 3	D4ACM1_RAT	3	-23.6282	0.763718
PD7 / VD7	O88506	O88506	0.0541388	0.0541388	0.0707463	0.20478	56	O88506	Stk39	STE20/SPS1-related proline-alanine-rich protein kinase	STK39_RAT	12	3.82392	1.03824
PD7 / VD7	A0A0G2K7T6;F1LS02;P37199	A0A0G2K7T6;F1LS02;P37199	-0.379823	0.379823	0.0707818	0.20478	12	A0A0G2K7T6;F1LS02;P37199	Nup155	Nuclear pore complex protein Nup155	A0A0G2K7T6_RAT;F1LS02_RAT;NU155_RAT	3	-23.1468	0.768532
PD7 / VD7	F1LPV0	F1LPV0	0.23997	0.23997	0.0711875	0.20498	135	F1LPV0	Nars	Asparaginyl-tRNA synthetase	F1LPV0_RAT	25	18.0968	1.18097
PD7 / VD7	A0A0G2JSL0;P28073	A0A0G2JSL0;P28073	-0.151611	0.151611	0.0711548	0.20498	32	A0A0G2JSL0;P28073	LOC100360846;Psmb6	Proteasome subunit beta;Proteasome subunit beta type-6	A0A0G2JSL0_RAT;PSB6_RAT	5	-9.97554	0.900245
PD7 / VD7	A0A0H2UHH9;D4ACJ1;P62850	A0A0H2UHH9;D4ACJ1;P62850	-0.195283	0.195283	0.0711478	0.20498	40	A0A0H2UHH9;D4ACJ1;P62850	Rps24;LOC100363469;Rps24	40S ribosomal protein S24	A0A0H2UHH9_RAT;D4ACJ1_RAT;RS24_RAT	6	-12.6599	0.873401
PD7 / VD7	D3Z9E1	D3Z9E1	-1.31304	1.31304	0.071121	0.20498	32	D3Z9E1	Emilin1	Elastin microfibril interfacer 1	D3Z9E1_RAT	7	-59.7528	0.402472
PD7 / VD7	P01946	P01946	-0.111824	0.111824	0.0714346	0.205206	108	P01946	Hba1	Hemoglobin subunit alpha-1/2	HBA_RAT	12	-7.45829	0.925417
PD7 / VD7	A0A0G2K2V2;G3V9N8	A0A0G2K2V2;G3V9N8	0.0903135	0.0903135	0.0714252	0.205206	136	A0A0G2K2V2;G3V9N8	Ap1b1	AP complex subunit beta	A0A0G2K2V2_RAT;G3V9N8_RAT	30	6.46015	1.0646
PD7 / VD7	M0RD14	M0RD14	-0.115497	0.115497	0.0719576	0.206222	28	M0RD14	LOC100362738	Pyruvate kinase	M0RD14_RAT	4	-7.69356	0.923064
PD7 / VD7	P54287	P54287	-0.396418	0.396418	0.0718879	0.206222	12	P54287	Cacnb3	Voltage-dependent L-type calcium channel subunit beta-3	CACB3_RAT	3	-24.0258	0.759742
PD7 / VD7	G3V7J7	G3V7J7	-0.00187741	0.00187741	0.0723284	0.206656	64	G3V7J7	Eif5a2	Eukaryotic translation initiation factor 5A	G3V7J7_RAT	9	-0.130048	0.9987
PD7 / VD7	G3V8V3	G3V8V3	0.144649	0.144649	0.0724289	0.206656	80	G3V8V3	Pygm	Alpha-1,4 glucan phosphorylase	G3V8V3_RAT	18	10.5461	1.10546
PD7 / VD7	P04906	P04906	0.013679	0.013679	0.0722773	0.206656	56	P04906	Gstp1	Glutathione S-transferase P	GSTP1_RAT	9	0.952662	1.00953
PD7 / VD7	Q9EPX0	Q9EPX0	-0.231453	0.231453	0.0724483	0.206656	8	Q9EPX0	Hspb8	Heat shock protein beta-8	HSPB8_RAT	2	-14.8224	0.851776
PD7 / VD7	F1LRV4;O88600	F1LRV4;O88600	0.207658	0.207658	0.0729874	0.20795	244	F1LRV4;O88600	Hspa4	Heat shock 70 kDa protein 4	F1LRV4_RAT;HSP74_RAT	42	15.4812	1.15481
PD7 / VD7	Q6AYR6	Q6AYR6	-0.645485	0.645485	0.0734395	0.20875	20	Q6AYR6	Hdhd2	Haloacid dehalogenase-like hydrolase domain-containing protein 2	HDHD2_RAT	5	-36.0722	0.639278
PD7 / VD7	Q9JJW3	Q9JJW3	-0.234675	0.234675	0.0733771	0.20875	16	Q9JJW3	Atp5md	ATP synthase membrane subunit DAPIT, mitochondrial	ATPMD_RAT	3	-15.0123	0.849877
PD7 / VD7	A0A0G2JZS1;F1LT58	A0A0G2JZS1;F1LT58	-0.175243	0.175243	0.0735466	0.208811	28	A0A0G2JZS1;F1LT58	Kpna6	Importin subunit alpha	A0A0G2JZS1_RAT;F1LT58_RAT	6	-11.4382	0.885618
PD7 / VD7	G3V960;P10868	G3V960;P10868	0.112666	0.112666	0.0737366	0.208863	20	G3V960;P10868	Gamt	Guanidinoacetate N-methyltransferase	G3V960_RAT;GAMT_RAT	4	8.12241	1.08122
PD7 / VD7	P52020	P52020	-0.556213	0.556213	0.0737034	0.208863	12	P52020	Sqle	Squalene monooxygenase	ERG1_RAT	3	-31.9915	0.680085
PD7 / VD7	P18420	P18420	0.129345	0.129345	0.0741651	0.209226	84	P18420	Psma1	Proteasome subunit alpha type-1	PSA1_RAT	14	9.3797	1.0938
PD7 / VD7	Q4G075	Q4G075	-0.00377441	0.00377441	0.074424	0.209226	72	Q4G075	Serpinb1a	Leukocyte elastase inhibitor A	ILEUA_RAT	13	-0.26128	0.997387
PD7 / VD7	P09456	P09456	0.114478	0.114478	0.0742526	0.209226	60	P09456	Prkar1a	cAMP-dependent protein kinase type I-alpha regulatory subunit	KAP0_RAT	10	8.25832	1.08258
PD7 / VD7	A0A0G2KAN1;F1LS40;P02466	A0A0G2KAN1;F1LS40;P02466	-0.481302	0.481302	0.0745518	0.209226	40	A0A0G2KAN1;F1LS40;P02466	NEWGENE_621351;Col1a2;Col1a2	Collagen, type I, alpha 2;Collagen type I alpha 2 chain;Collagen alpha-2(I) chain	A0A0G2KAN1_RAT;F1LS40_RAT;CO1A2_RAT	9	-28.3669	0.716331
PD7 / VD7	D4AE96	D4AE96	-0.30149	0.30149	0.0739642	0.209226	28	D4AE96	Ipo7	Importin 7	D4AE96_RAT	7	-18.8586	0.811414
PD7 / VD7	M0R919	M0R919	-0.266145	0.266145	0.0745261	0.209226	16	M0R919	Vbp1	Prefoldin subunit 3	M0R919_RAT	4	-16.8461	0.831539
PD7 / VD7	D4A617;F1M0G3;P97687	D4A617;F1M0G3;P97687	-0.631671	0.631671	0.0744839	0.209226	24	D4A617;F1M0G3;P97687	LOC103689954;Entpd1;Entpd1	Ectonucleoside triphosphate diphosphohydrolase 1	D4A617_RAT;F1M0G3_RAT;ENTP1_RAT	4	-35.4571	0.645429
PD7 / VD7	F1LLX6	F1LLX6	NaN	NaN	0.0826422	0.217404	4	F1LLX6	Cadps	Calcium-dependent secretion activator 1	F1LLX6_RAT	1	NaN	NaN
PD7 / VD7	P47196	P47196	NaN	NaN	0.0827649	0.217492	4	P47196	Akt1	RAC-alpha serine/threonine-protein kinase	AKT1_RAT	1	NaN	NaN
PD7 / VD7	Q9Z2Q7	Q9Z2Q7	-0.888445	0.888445	0.0746617	0.209293	12	Q9Z2Q7	Stx8	Syntaxin-8	STX8_RAT	2	-45.9804	0.540196
PD7 / VD7	P50475	P50475	0.295625	0.295625	0.0749358	0.20982	200	P50475	Aars	Alanine--tRNA ligase, cytoplasmic	SYAC_RAT	34	22.7417	1.22742
PD7 / VD7	A0A0G2JVL6	A0A0G2JVL6	-0.0544078	0.0544078	0.0754334	0.210007	48	A0A0G2JVL6	Ndufa8	NADH dehydrogenase [ubiquinone] 1 alpha subcomplex subunit 8	A0A0G2JVL6_RAT	7	-3.70104	0.96299
PD7 / VD7	M0RDJ3;Q63184	M0RDJ3;Q63184	0.111534	0.111534	0.0752724	0.210007	28	M0RDJ3;Q63184	Eif2ak2	Interferon-induced, double-stranded RNA-activated protein kinase;Interferon-induced, double-stranded RNA-activated protein kinase	M0RDJ3_RAT;E2AK2_RAT	6	8.0376	1.08038
PD7 / VD7	F7FJQ3	F7FJQ3	0.0253435	0.0253435	0.0754134	0.210007	16	F7FJQ3	Npc2	NPC intracellular cholesterol transporter 2	F7FJQ3_RAT	2	1.7722	1.01772
PD7 / VD7	Q5XIB4	Q5XIB4	-0.293823	0.293823	0.0753019	0.210007	20	Q5XIB4	Ufsp2	Ufm1-specific protease 2	UFSP2_RAT	6	-18.4263	0.815737
PD7 / VD7	P11506	P11506	-0.312096	0.312096	0.0754186	0.210007	20	P11506	Atp2b2	Plasma membrane calcium-transporting ATPase 2	AT2B2_RAT	4	-19.4529	0.805471
PD7 / VD7	A0A0G2JV04;D3ZHG8	A0A0G2JV04;D3ZHG8	NaN	NaN	0.0836404	0.218126	4	A0A0G2JV04;D3ZHG8	Gga3	ADP-ribosylation factor-binding protein GGA3	GGA3_RAT;D3ZHG8_RAT	1	NaN	NaN
PD7 / VD7	D3ZT71	D3ZT71	-0.307154	0.307154	0.0755196	0.210007	12	D3ZT71	Bcl2l13	BCL2-like 13	D3ZT71_RAT	3	-19.1765	0.808235
PD7 / VD7	B2RYJ4	B2RYJ4	NaN	NaN	0.0835454	0.218126	4	B2RYJ4	Aasdhppt	L-aminoadipate-semialdehyde dehydrogenase-phosphopantetheinyl transferase	ADPPT_RAT	1	NaN	NaN
PD7 / VD7	O35820	O35820	NaN	NaN	0.0837222	0.218126	4	O35820	Dnph1	2'-deoxynucleoside 5'-phosphate N-hydrolase 1	DNPH1_RAT	1	NaN	NaN
PD7 / VD7	Q5XIP9	Q5XIP9	0.11381	0.11381	0.0757598	0.210434	44	Q5XIP9	Tmem43	Transmembrane protein 43	TMM43_RAT	9	8.20818	1.08208
PD7 / VD7	A0A0G2JT50;M0R4R4;M0RD55	A0A0G2JT50;M0R4R4;M0RD55	-0.328788	0.328788	0.0760221	0.210922	64	A0A0G2JT50;M0R4R4;M0RD55	Gas7	Growth arrest-specific protein 7	A0A0G2JT50_RAT;M0R4R4_RAT;M0RD55_RAT	10	-20.3795	0.796205
PD7 / VD7	A0A0G2QC02	A0A0G2QC02	0.0332812	0.0332812	0.0761299	0.210966	48	A0A0G2QC02	Skiv2l	Ski2-like RNA helicase	A0A0G2QC02_RAT	12	2.33369	1.02334
PD7 / VD7	A0A0G2JUD6;F1LQZ3	A0A0G2JUD6;F1LQZ3	-0.0842856	0.0842856	0.0762112	0.210966	24	A0A0G2JUD6;F1LQZ3	Kif3a	Kinesin-like protein	A0A0G2JUD6_RAT;F1LQZ3_RAT	6	-5.67485	0.943251
PD7 / VD7	P62907	P62907	0.0489525	0.0489525	0.0766947	0.211984	84	P62907	Rpl10a	60S ribosomal protein L10a	RL10A_RAT	11	3.45135	1.03451
PD7 / VD7	D3ZQY4	D3ZQY4	-0.23865	0.23865	0.0767528	0.211984	16	D3ZQY4	Fryl	FRY-like transcription coactivator	D3ZQY4_RAT	4	-15.2462	0.847538
PD7 / VD7	D3ZSA9	D3ZSA9	0.127936	0.127936	0.076949	0.212285	144	D3ZSA9	Nomo1	Nodal modulator 1	D3ZSA9_RAT	29	9.27293	1.09273
PD7 / VD7	A0A0G2JWC7;Q5XI19	A0A0G2JWC7;Q5XI19	0.143191	0.143191	0.0774615	0.212496	132	A0A0G2JWC7;Q5XI19	Fermt2	Fermitin family member 2;Fermitin family homolog 2 (Drosophila)	A0A0G2JWC7_RAT;Q5XI19_RAT	24	10.4345	1.10434
PD7 / VD7	P15865	P15865	0.0898889	0.0898889	0.0773718	0.212496	60	P15865	Hist1h1e	Histone H1.4	H14_RAT	9	6.42882	1.06429
PD7 / VD7	A0A0G2K896	A0A0G2K896	0.11651	0.11651	0.0773957	0.212496	88	A0A0G2K896	RGD1310507	Similar to RIKEN cDNA 1300017J02	A0A0G2K896_RAT	16	8.41091	1.08411
PD7 / VD7	A0A0G2JZZ4	A0A0G2JZZ4	-0.384808	0.384808	0.0772246	0.212496	12	A0A0G2JZZ4	Selenom	Selenoprotein M	A0A0G2JZZ4_RAT	3	-23.4119	0.765881
PD7 / VD7	D4A7U6	D4A7U6	NaN	NaN	0.0860665	0.220742	4	D4A7U6	Lsm3	U6 snRNA-associated Sm-like protein LSm3	D4A7U6_RAT	1	NaN	NaN
PD7 / VD7	D3ZJZ0	D3ZJZ0	NaN	NaN	0.0861765	0.220742	4	D3ZJZ0	Tmem205	RGD1563250 (Predicted), isoform CRA_a	D3ZJZ0_RAT	1	NaN	NaN
PD7 / VD7	D3ZNQ6	D3ZNQ6	0.252266	0.252266	0.0773177	0.212496	20	D3ZNQ6	Ube2m	Ubiquitin-conjugating enzyme E2M	D3ZNQ6_RAT	5	19.1077	1.19108
PD7 / VD7	D4AE56	D4AE56	0.187187	0.187187	0.077712	0.212709	20	D4AE56	Ptges2	Prostaglandin E synthase 2	D4AE56_RAT	5	13.8542	1.13854
PD7 / VD7	D4A3K5	D4A3K5	-0.00167459	0.00167459	0.0778774	0.212917	12	D4A3K5	Hist1h1a	Histone H1.1	H11_RAT	2	-0.116007	0.99884
PD7 / VD7	Q8VI04	Q8VI04	0.150223	0.150223	0.0779649	0.212918	60	Q8VI04	Asrgl1	Isoaspartyl peptidase/L-asparaginase	ASGL1_RAT	13	10.9741	1.10974
PD7 / VD7	Q63584	Q63584	-0.195812	0.195812	0.0780606	0.21294	40	Q63584	Tmed10	Transmembrane emp24 domain-containing protein 10	TMEDA_RAT	6	-12.6918	0.873082
PD7 / VD7	O35814	O35814	-0.128365	0.128365	0.0782447	0.213204	140	O35814	Stip1	Stress-induced-phosphoprotein 1	STIP1_RAT	22	-8.51321	0.914868
PD7 / VD7	D3ZGF1;F1LSA1;O70509;P26051	D3ZGF1;F1LSA1;O70509;P26051	-0.236579	0.236579	0.0791406	0.214008	28	D3ZGF1;F1LSA1;O70509;P26051	Cd44	CD44 antigen	D3ZGF1_RAT;F1LSA1_RAT;O70509_RAT;CD44_RAT	4	-15.1244	0.848756
PD7 / VD7	P20788	P20788	-0.151113	0.151113	0.0791885	0.214008	48	P20788	Uqcrfs1	Cytochrome b-c1 complex subunit Rieske, mitochondrial	UCRI_RAT	7	-9.94446	0.900555
PD7 / VD7	F7FHF7;Q6IRL2;Q8R500	F7FHF7;Q6IRL2;Q8R500	-0.384449	0.384449	0.0792331	0.214008	16	F7FHF7;Q6IRL2;Q8R500	LOC100911485;LOC100911485;Mfn2	Mitofusin-2;Mitofusin 2, isoform CRA_a;Mitofusin-2	F7FHF7_RAT;Q6IRL2_RAT;MFN2_RAT	4	-23.3928	0.766072
PD7 / VD7	A8WCF8	A8WCF8	-0.319849	0.319849	0.0791654	0.214008	20	A8WCF8	Tprg1l	Tumor protein p63-regulated gene 1-like protein	TPRGL_RAT	4	-19.8846	0.801154
PD7 / VD7	F1LV89	F1LV89	-0.366298	0.366298	0.078945	0.214008	40	F1LV89	Rap1gap	Rap1 GTPase-activating protein	F1LV89_RAT	7	-22.423	0.77577
PD7 / VD7	P61265	P61265	0.241759	0.241759	0.0788386	0.214008	28	P61265	Stx1b	Syntaxin-1B	STX1B_RAT	6	18.2433	1.18243
PD7 / VD7	G3V8Q8	G3V8Q8	-0.0635237	0.0635237	0.0792428	0.214008	40	G3V8Q8	Sec23ip	RCG40648, isoform CRA_b	G3V8Q8_RAT	9	-4.3076	0.956924
PD7 / VD7	Q498R7	Q498R7	-0.270065	0.270065	0.0787738	0.214008	16	Q498R7	Czib	CXXC motif containing zinc binding protein	CZIB_RAT	3	-17.0718	0.829282
PD7 / VD7	A0A0G2JXY9;F1LQ45;Q505I9	A0A0G2JXY9;F1LQ45;Q505I9	-0.052	0.052	0.0793929	0.214176	16	A0A0G2JXY9;F1LQ45;Q505I9	Epn2	Epsin-2	A0A0G2JXY9_RAT;F1LQ45_RAT;Q505I9_RAT	4	-3.54018	0.964598
PD7 / VD7	Q6AYG3	Q6AYG3	0.0180648	0.0180648	0.0796332	0.214587	48	Q6AYG3	Prune1	Exopolyphosphatase PRUNE1	PRUN1_RAT	10	1.26003	1.0126
PD7 / VD7	Q566C7	Q566C7	0.119294	0.119294	0.0798915	0.214811	24	Q566C7	Nudt3	Diphosphoinositol polyphosphate phosphohydrolase 1	NUDT3_RAT	4	8.62031	1.0862
PD7 / VD7	P36201	P36201	-0.0726565	0.0726565	0.0798926	0.214811	28	P36201	Crip2	Cysteine-rich protein 2	CRIP2_RAT	4	-4.91145	0.950885
PD7 / VD7	P62966	P62966	0.317337	0.317337	0.0804727	0.215625	12	P62966	Crabp1	Cellular retinoic acid-binding protein 1	RABP1_RAT	2	24.6028	1.24603
PD7 / VD7	Q6AZ73	Q6AZ73	-0.270745	0.270745	0.0805492	0.215625	32	Q6AZ73	Plekhb1	Pleckstrin homology domain containing, family B (Evectins) member 1, isoform CRA_d	Q6AZ73_RAT	6	-17.1109	0.828891
PD7 / VD7	M0R3X3	M0R3X3	-0.041227	0.041227	0.0805497	0.215625	16	M0R3X3	Arhgef10	Rho guanine nucleotide exchange factor 10	M0R3X3_RAT	4	-2.81719	0.971828
PD7 / VD7	G3V827;Q08415	G3V827;Q08415	-0.407415	0.407415	0.0803167	0.215625	16	G3V827;Q08415	Kyat1	Cysteine conjugate-beta lyase 1, isoform CRA_a;Kynurenine--oxoglutarate transaminase 1, mitochondrial	G3V827_RAT;KAT1_RAT	4	-24.6027	0.753973
PD7 / VD7	D4A1J6	D4A1J6	0.195746	0.195746	0.0807775	0.215766	36	D4A1J6	Ankfy1	Ankyrin repeat and FYVE domain-containing 1	D4A1J6_RAT	9	14.5317	1.14532
PD7 / VD7	F1LSM5;P55161	F1LSM5;P55161	-0.220518	0.220518	0.0807795	0.215766	48	F1LSM5;P55161	Nckap1	Nck-associated protein 1	F1LSM5_RAT;NCKP1_RAT	11	-14.1743	0.858257
PD7 / VD7	Q9QZ76	Q9QZ76	-0.517449	0.517449	0.0808706	0.215773	16	Q9QZ76	Mb	Myoglobin	MYG_RAT	3	-30.1394	0.698606
PD7 / VD7	P06765	P06765	1.06922	1.06922	0.0816834	0.216427	24	P06765	Pf4	Platelet factor 4	PLF4_RAT	4	109.83	2.0983
PD7 / VD7	A0A0G2JY43	A0A0G2JY43	0.0688332	0.0688332	0.0813368	0.216427	64	A0A0G2JY43	Aldh3a2	Fatty aldehyde dehydrogenase	A0A0G2JY43_RAT	12	4.88681	1.04887
PD7 / VD7	G3V6U9	G3V6U9	-0.621841	0.621841	0.0815051	0.216427	32	G3V6U9	Setd3	Actin-histidine N-methyltransferase	SETD3_RAT	7	-35.0159	0.649841
PD7 / VD7	D3ZDU5;Q9EPC6	D3ZDU5;Q9EPC6	0.300328	0.300328	0.0818265	0.216427	28	D3ZDU5;Q9EPC6	Pfn2	Profilin;Profilin-2	D3ZDU5_RAT;PROF2_RAT	6	23.1424	1.23142
PD7 / VD7	A0A096MKD4;A0A0G2JYM0	A0A096MKD4;A0A0G2JYM0	0.904344	0.904344	0.0815521	0.216427	32	A0A096MKD4;A0A0G2JYM0	Ldb3	LIM domain-binding 3	A0A096MKD4_RAT;A0A0G2JYM0_RAT	7	87.1694	1.87169
PD7 / VD7	F1LRM0	F1LRM0	-0.285832	0.285832	0.0812973	0.216427	12	F1LRM0	Scaper	S-phase cyclin A-associated protein in the ER	F1LRM0_RAT	3	-17.9732	0.820268
PD7 / VD7	O35264	O35264	-0.614853	0.614853	0.0816239	0.216427	16	O35264	Pafah1b2	Platelet-activating factor acetylhydrolase IB subunit beta	PA1B2_RAT	3	-34.7003	0.652997
PD7 / VD7	P54319	P54319	0.118091	0.118091	0.0818057	0.216427	60	P54319	Plaa	Phospholipase A-2-activating protein	PLAP_RAT	13	8.52975	1.0853
PD7 / VD7	B2RZB7	B2RZB7	-0.309399	0.309399	0.0822201	0.216762	28	B2RZB7	Snrpd1	Small nuclear ribonucleoprotein Sm D1	B2RZB7_RAT	4	-19.3022	0.806978
PD7 / VD7	P0C0R5	P0C0R5	-0.676742	0.676742	0.0820456	0.216762	12	P0C0R5	Pik3r4	Phosphoinositide 3-kinase regulatory subunit 4	PI3R4_RAT	3	-37.4424	0.625576
PD7 / VD7	Q6DKG0	Q6DKG0	NaN	NaN	0.0906897	0.22383	4	Q6DKG0	Naa35	N-alpha-acetyltransferase 35, NatC auxiliary subunit	NAA35_RAT	1	NaN	NaN
PD7 / VD7	Q642A9	Q642A9	-0.154054	0.154054	0.082188	0.216762	12	Q642A9	Vps16	Vacuolar protein sorting-associated protein 16 homolog	Q642A9_RAT	3	-10.1278	0.898722
PD7 / VD7	B0BMU7	B0BMU7	NaN	NaN	0.091164	0.224546	4	B0BMU7	Elp5	Elongator complex protein 5	B0BMU7_RAT	1	NaN	NaN
PD7 / VD7	D4ADS4	D4ADS4	-0.518245	0.518245	0.0823912	0.216978	16	D4ADS4	Mgst3	Microsomal glutathione S-transferase 3	D4ADS4_RAT	4	-30.1779	0.698221
PD7 / VD7	A0A096P6L9	A0A096P6L9	0.257417	0.257417	0.0838224	0.218126	40	A0A096P6L9	C5	Complement C5	A0A096P6L9_RAT	10	19.5336	1.19534
PD7 / VD7	D3ZZ54;M0RAX4;P62882	D3ZZ54;M0RAX4;P62882	0.384703	0.384703	0.0839909	0.218126	12	D3ZZ54;M0RAX4;P62882	Gnb5	Guanine nucleotide-binding protein subunit beta-5	D3ZZ54_RAT;M0RAX4_RAT;GNB5_RAT	2	30.5591	1.30559
PD7 / VD7	P41123	P41123	0.01941	0.01941	0.0836361	0.218126	44	P41123	Rpl13	60S ribosomal protein L13	RL13_RAT	6	1.35449	1.01354
PD7 / VD7	A0A0G2JX93;F1M9D6	A0A0G2JX93;F1M9D6	0.11658	0.11658	0.0838758	0.218126	68	A0A0G2JX93;F1M9D6	Stat1	Signal transducer and activator of transcription	A0A0G2JX93_RAT;F1M9D6_RAT	15	8.41616	1.08416
PD7 / VD7	Q64057	Q64057	-0.0112303	0.0112303	0.0836865	0.218126	80	Q64057	Aldh7a1	Alpha-aminoadipic semialdehyde dehydrogenase	AL7A1_RAT	17	-0.775403	0.992246
PD7 / VD7	A0A0G2K724;Q4G009	A0A0G2K724;Q4G009	-0.347227	0.347227	0.0839445	0.218126	16	A0A0G2K724;Q4G009	Mcts1	Malignant T-cell-amplified sequence;Malignant T-cell-amplified sequence 1	A0A0G2K724_RAT;MCTS1_RAT	3	-21.3906	0.786094
PD7 / VD7	D4A5I9	D4A5I9	-0.148102	0.148102	0.0833918	0.218126	40	D4A5I9	Myo6	Myosin VI	D4A5I9_RAT	10	-9.75633	0.902437
PD7 / VD7	Q9ES71	Q9ES71	-0.611135	0.611135	0.0836507	0.218126	8	Q9ES71	Gnpat	Dihydroxyacetone phosphate acyltransferase	GNPAT_RAT	2	-34.5319	0.654681
PD7 / VD7	P54001	P54001	0.284099	0.284099	0.0845228	0.21904	40	P54001	P4ha1	Prolyl 4-hydroxylase subunit alpha-1	P4HA1_RAT	8	21.765	1.21765
PD7 / VD7	Q62636	Q62636	0.64637	0.64637	0.0844634	0.21904	26	Q62636	Rap1b	Ras-related protein Rap-1b	RAP1B_RAT	5	56.5225	1.56523
PD7 / VD7	D4A678	D4A678	0.408608	0.408608	0.084833	0.219407	568	D4A678	Spta1	Spectrin, alpha, erythrocytic 1	D4A678_RAT	101	32.7405	1.3274
PD7 / VD7	Q05030	Q05030	NaN	NaN	0.0937116	0.228047	4	Q05030	Pdgfrb	Platelet-derived growth factor receptor beta	PGFRB_RAT	1	NaN	NaN
PD7 / VD7	A0A0H2UHV9	A0A0H2UHV9	0.0917149	0.0917149	0.0848447	0.219407	48	A0A0H2UHV9	Copg2	Coatomer subunit gamma	A0A0H2UHV9_RAT	11	6.56361	1.06564
PD7 / VD7	A0A0G2K6F1;F1M9Y7	A0A0G2K6F1;F1M9Y7	-0.106537	0.106537	0.0850473	0.219551	36	A0A0G2K6F1;F1M9Y7	Tcp11l1	T-complex 11-like 1	A0A0G2K6F1_RAT;F1M9Y7_RAT	9	-7.11849	0.928815
PD7 / VD7	A0A0G2K9B2;Q80VJ4	A0A0G2K9B2;Q80VJ4	-1.0705	1.0705	0.0850803	0.219551	8	A0A0G2K9B2;Q80VJ4	Gpcpd1	Glycerophosphocholine phosphodiesterase GPCPD1	A0A0G2K9B2_RAT;GPCP1_RAT	2	-52.3845	0.476155
PD7 / VD7	B5D5S8;Q5CC43;Q5CC44;Q924M0;Q9Z0U4	B5D5S8;Q5CC43;Q5CC44;Q924M0;Q9Z0U4	-0.528593	0.528593	0.0854638	0.220307	8	B5D5S8;Q5CC43;Q5CC44;Q924M0;Q9Z0U4	Gabbr1	GABA-B1j;GABA-BR1i receptor;GABA-BR1h receptor;GABA type B receptor 1f;Gamma-aminobutyric acid type B receptor subunit 1	B5D5S8_RAT;Q5CC43_RAT;Q5CC44_RAT;Q924M0_RAT;GABR1_RAT	2	-30.6769	0.693231
PD7 / VD7	Q4V8E4	Q4V8E4	-0.400633	0.400633	0.0856613	0.220582	12	Q4V8E4	Cfap36	Cilia- and flagella-associated protein 36	CFA36_RAT	3	-24.2474	0.757526
PD7 / VD7	A0A0G2JUN8;Q9JHW0	A0A0G2JUN8;Q9JHW0	0.114381	0.114381	0.0857906	0.220682	36	A0A0G2JUN8;Q9JHW0	Psmb7	Proteasome subunit beta;Proteasome subunit beta type-7	A0A0G2JUN8_RAT;PSB7_RAT	6	8.25104	1.08251
PD7 / VD7	G3V6H9	G3V6H9	-0.258766	0.258766	0.0858918	0.220709	32	G3V6H9	Nap1l1	Nucleosome assembly protein 1-like 1	G3V6H9_RAT	6	-16.4197	0.835803
PD7 / VD7	Q5RJQ4	Q5RJQ4	-0.0814218	0.0814218	0.0860905	0.220742	60	Q5RJQ4	Sirt2	NAD-dependent protein deacetylase sirtuin-2	SIR2_RAT	14	-5.48743	0.945126
PD7 / VD7	P42123	P42123	0.0905474	0.0905474	0.0863982	0.221078	116	P42123	Ldhb	L-lactate dehydrogenase B chain	LDHB_RAT	17	6.47741	1.06477
PD7 / VD7	Q6IMZ5	Q6IMZ5	-0.283446	0.283446	0.0866901	0.221592	52	Q6IMZ5	Tmod1	Tropomodulin-1	Q6IMZ5_RAT	12	-17.8374	0.821626
PD7 / VD7	A0A0H2UHX1	A0A0H2UHX1	-0.0981923	0.0981923	0.0879841	0.22168	16	A0A0H2UHX1	Rtn3	Reticulon	A0A0H2UHX1_RAT	2	-6.57972	0.934203
PD7 / VD7	Q6P503	Q6P503	-0.32759	0.32759	0.0879359	0.22168	20	Q6P503	Atp6v1d	ATPase H+-transporting V1 subunit D	Q6P503_RAT	4	-20.3133	0.796867
PD7 / VD7	A0A0G2JZM8	A0A0G2JZM8	0.00206014	0.00206014	0.0877304	0.22168	60	A0A0G2JZM8	Clasp2	CLIP-associating protein 2	A0A0G2JZM8_RAT	15	0.1429	1.00143
PD7 / VD7	Q3B8R7	Q3B8R7	NaN	NaN	0.0957888	0.229667	8	Q3B8R7	Mrpl47	Mitochondrial ribosomal protein L47	Q3B8R7_RAT	1	NaN	NaN
PD7 / VD7	D4A4T0	D4A4T0	-0.204718	0.204718	0.0869608	0.22168	40	D4A4T0	Stub1	STIP1 homology and U-Box containing protein 1, isoform CRA_b	D4A4T0_RAT	8	-13.2292	0.867708
PD7 / VD7	P61203	P61203	-0.0356112	0.0356112	0.0872431	0.22168	56	P61203	Cops2	COP9 signalosome complex subunit 2	CSN2_RAT	10	-2.43816	0.975618
PD7 / VD7	Q8CF97	Q8CF97	-0.103214	0.103214	0.0876887	0.22168	40	Q8CF97	Vcpip1	Deubiquitinating protein VCIP135	VCIP1_RAT	10	-6.90431	0.930957
PD7 / VD7	A0A0G2JT06;A0A0G2JW80;P97834	A0A0G2JT06;A0A0G2JW80;P97834	-0.0481141	0.0481141	0.0871465	0.22168	48	A0A0G2JT06;A0A0G2JW80;P97834	Gps1	COP9 signalosome complex subunit 1	A0A0G2JT06_RAT;A0A0G2JW80_RAT;CSN1_RAT	9	-3.28002	0.9672
PD7 / VD7	A0A0A0MY48;A0A0A0MY49;P39052	A0A0A0MY48;A0A0A0MY49;P39052	0.132798	0.132798	0.0878853	0.22168	52	A0A0A0MY48;A0A0A0MY49;P39052	Dnm2	Dynamin-2	A0A0A0MY48_RAT;A0A0A0MY49_RAT;DYN2_RAT	12	9.6418	1.09642
PD7 / VD7	Q9Z1E1	Q9Z1E1	0.00125333	0.00125333	0.0875783	0.22168	116	Q9Z1E1	Flot1	Flotillin-1	FLOT1_RAT	23	0.0869119	1.00087
PD7 / VD7	A0A0G2JZF0;B5DEG8	A0A0G2JZF0;B5DEG8	0.147707	0.147707	0.0870077	0.22168	64	A0A0G2JZF0;B5DEG8	Sec24c	SEC24 homolog C, COPII coat complex component;LOC685144 protein	A0A0G2JZF0_RAT;B5DEG8_RAT	15	10.7807	1.10781
PD7 / VD7	B2GVB9	B2GVB9	0.752177	0.752177	0.087299	0.22168	40	B2GVB9	Fermt3	Fermitin family member 3	B2GVB9_RAT	10	68.4332	1.68433
PD7 / VD7	D3ZIE9	D3ZIE9	-0.0881725	0.0881725	0.0875519	0.22168	32	D3ZIE9	Aldh18a1	Delta-1-pyrroline-5-carboxylate synthase	D3ZIE9_RAT	8	-5.92864	0.940714
PD7 / VD7	A0A096MJZ2	A0A096MJZ2	0.207213	0.207213	0.0879985	0.22168	20	A0A096MJZ2	Tbl2	RCG21429, isoform CRA_b	A0A096MJZ2_RAT	5	15.4456	1.15446
PD7 / VD7	A0A0G2JYR1	A0A0G2JYR1	0.253597	0.253597	0.0875523	0.22168	16	A0A0G2JYR1	Exoc6b	Exocyst complex component	A0A0G2JYR1_RAT	4	19.2176	1.19218
PD7 / VD7	Q9ES21	Q9ES21	0.154061	0.154061	0.0885134	0.221883	96	Q9ES21	Sacm1l	Phosphatidylinositide phosphatase SAC1	SAC1_RAT	19	11.2697	1.1127
PD7 / VD7	D3ZZW1	D3ZZW1	NaN	NaN	0.0977747	0.231242	4	D3ZZW1	Dock1	Dedicator of cyto-kinesis 1	D3ZZW1_RAT	1	NaN	NaN
PD7 / VD7	M0RDD7	M0RDD7	0.378007	0.378007	0.0885744	0.221883	20	M0RDD7	Chtopl1	Chromatin target of PRMT1-like 1	M0RDD7_RAT	3	29.9546	1.29955
PD7 / VD7	A0A0G2K1L8;Q05175	A0A0G2K1L8;Q05175	NaN	NaN	0.0980323	0.231626	4	A0A0G2K1L8;Q05175	Basp1	Brain acid soluble protein 1	A0A0G2K1L8_RAT;BASP1_RAT	1	NaN	NaN
PD7 / VD7	P62749	P62749	-0.0907129	0.0907129	0.0884169	0.221883	24	P62749	Hpcal1	Hippocalcin-like protein 1	HPCL1_RAT	6	-6.09414	0.939059
PD7 / VD7	Q63258	Q63258	0.296572	0.296572	0.0886257	0.221883	84	Q63258	Itga7	Integrin alpha-7	ITA7_RAT	17	22.8223	1.22822
PD7 / VD7	D4A4T9	D4A4T9	0.252543	0.252543	0.0885148	0.221883	48	D4A4T9	Chordc1	Cysteine and histidine-rich domain-containing protein 1	CHRD1_RAT	9	19.1305	1.1913
PD7 / VD7	E9PT66	E9PT66	0.0155672	0.0155672	0.088275	0.221883	64	E9PT66	Sf3b3	Splicing factor 3b, subunit 3	E9PT66_RAT	15	1.08488	1.01085
PD7 / VD7	Q505J8	Q505J8	0.0470098	0.0470098	0.0891059	0.222559	92	Q505J8	Farsa	Phenylalanine--tRNA ligase alpha subunit	SYFA_RAT	16	3.31214	1.03312
PD7 / VD7	A0A140TAB4;Q02874	A0A140TAB4;Q02874	0.0415595	0.0415595	0.0890019	0.222559	60	A0A140TAB4;Q02874	H2afy	Core histone macro-H2A;Core histone macro-H2A.1	A0A140TAB4_RAT;H2AY_RAT	11	2.92258	1.02923
PD7 / VD7	F8WG88;Q62632	F8WG88;Q62632	-0.164956	0.164956	0.089194	0.222559	28	F8WG88;Q62632	Fstl1	Follistatin-related protein 1	F8WG88_RAT;FSTL1_RAT	6	-10.8044	0.891956
PD7 / VD7	Q497B0	Q497B0	0.0900718	0.0900718	0.0892716	0.222559	56	Q497B0	Nit2	Omega-amidase NIT2	NIT2_RAT	12	6.44232	1.06442
PD7 / VD7	A0A0G2KB18;D4ACD9	A0A0G2KB18;D4ACD9	-0.390812	0.390812	0.0894439	0.222559	16	A0A0G2KB18;D4ACD9	Ptpdc1	Protein tyrosine phosphatase domain-containing 1;Protein tyrosine phosphatase domain containing 1 (Predicted), isoform CRA_a	A0A0G2KB18_RAT;D4ACD9_RAT	3	-23.73	0.7627
PD7 / VD7	G3V7H6;O08701	G3V7H6;O08701	-0.541602	0.541602	0.0893932	0.222559	12	G3V7H6;O08701	Arg2	Arginase;Arginase-2, mitochondrial	G3V7H6_RAT;ARGI2_RAT	3	-31.2992	0.687008
PD7 / VD7	D4A702	D4A702	-0.425386	0.425386	0.0896219	0.222774	12	D4A702	Synpo2	Synaptopodin-2	SYNP2_RAT	2	-25.536	0.74464
PD7 / VD7	D4A2G9	D4A2G9	-0.0551876	0.0551876	0.0901251	0.223446	36	D4A2G9	Ranbp1	RAN-binding protein 1	D4A2G9_RAT	6	-3.75307	0.962469
PD7 / VD7	Q64303	Q64303	0.072193	0.072193	0.0900769	0.223446	72	Q64303	Pak2	Serine/threonine-protein kinase PAK 2	PAK2_RAT	14	5.13135	1.05131
PD7 / VD7	A0A0G2JT30;Q5U2R0	A0A0G2JT30;Q5U2R0	-0.190443	0.190443	0.0901673	0.223446	20	A0A0G2JT30;Q5U2R0	Mat2b	Methionine adenosyltransferase 2 subunit beta	A0A0G2JT30_RAT;MAT2B_RAT	5	-12.3664	0.876336
PD7 / VD7	P07633	P07633	0.088929	0.088929	0.0904178	0.22383	44	P07633	Pccb	Propionyl-CoA carboxylase beta chain, mitochondrial	PCCB_RAT	11	6.35804	1.06358
PD7 / VD7	D3ZZ99	D3ZZ99	NaN	NaN	0.0995389	0.231934	4	D3ZZ99	Add1	Alpha-adducin	D3ZZ99_RAT	1	NaN	NaN
PD7 / VD7	A0A0G2K621;D3ZRC4	A0A0G2K621;D3ZRC4	NaN	NaN	0.100007	0.232459	4	A0A0G2K621;D3ZRC4	Pnpla8	Patatin-like phospholipase domain-containing 8	A0A0G2K621_RAT;D3ZRC4_RAT	1	NaN	NaN
PD7 / VD7	Q5XI77	Q5XI77	0.0924412	0.0924412	0.0906803	0.22383	88	Q5XI77	Anxa11	Annexin	Q5XI77_RAT	15	6.61728	1.06617
PD7 / VD7	B2RYF7	B2RYF7	-0.348982	0.348982	0.0906417	0.22383	16	B2RYF7	Washc1	WASH complex subunit 1	WASH1_RAT	4	-21.4862	0.785138
PD7 / VD7	D3ZMR9	D3ZMR9	NaN	NaN	0.100307	0.232672	4	D3ZMR9	Mrpl21	Mitochondrial ribosomal protein L21	D3ZMR9_RAT	1	NaN	NaN
PD7 / VD7	D3ZA31	D3ZA31	-0.252002	0.252002	0.09106	0.224516	20	D3ZA31	Mtmr2	Myotubularin related protein 2 (Predicted), isoform CRA_b	D3ZA31_RAT	5	-16.027	0.83973
PD7 / VD7	Q62952	Q62952	0.217537	0.217537	0.0915324	0.224947	144	Q62952	Dpysl3	Dihydropyrimidinase-related protein 3	DPYL3_RAT	23	16.2747	1.16275
PD7 / VD7	F7EQ81;Q32KJ5	F7EQ81;Q32KJ5	-0.302949	0.302949	0.0914969	0.224947	16	F7EQ81;Q32KJ5	Gns	N-acetylglucosamine-6-sulfatase	F7EQ81_RAT;Q32KJ5_RAT	4	-18.9406	0.810594
PD7 / VD7	A0A140TAJ3;Q32PX7	A0A140TAJ3;Q32PX7	-0.253971	0.253971	0.0916039	0.224947	20	A0A140TAJ3;Q32PX7	Fubp1	Far upstream element-binding protein 1	A0A140TAJ3_RAT;FUBP1_RAT	5	-16.1415	0.838585
PD7 / VD7	Q9Z269	Q9Z269	-0.0894694	0.0894694	0.0917749	0.22514	60	Q9Z269	Vapb	Vesicle-associated membrane protein-associated protein B	VAPB_RAT	8	-6.01317	0.939868
PD7 / VD7	P04762	P04762	0.388912	0.388912	0.0930648	0.227616	148	P04762	Cat	Catalase	CATA_RAT	24	30.9405	1.30941
PD7 / VD7	A0A0G2K6D5;D3ZUF9	A0A0G2K6D5;D3ZUF9	-0.0995177	0.0995177	0.0929982	0.227616	52	A0A0G2K6D5;D3ZUF9	Pitrm1	Pitrilysin metallopeptidase 1;Pitrilysin metallepetidase 1 (Predicted)	A0A0G2K6D5_RAT;D3ZUF9_RAT	9	-6.66551	0.933345
PD7 / VD7	Q5GFD9	Q5GFD9	0.0610569	0.0610569	0.0930622	0.227616	28	Q5GFD9	Impact	Protein IMPACT	IMPCT_RAT	6	4.32297	1.04323
PD7 / VD7	G3V836;P05371	G3V836;P05371	-0.350385	0.350385	0.0935494	0.228047	40	G3V836;P05371	Clu	Clusterin	G3V836_RAT;CLUS_RAT	8	-21.5625	0.784375
PD7 / VD7	Q09073	Q09073	-0.0900964	0.0900964	0.0938026	0.228047	104	Q09073	Slc25a5	ADP/ATP translocase 2	ADT2_RAT	15	-6.054	0.93946
PD7 / VD7	A0A0G2JYU6	A0A0G2JYU6	NaN	NaN	0.101131	0.233289	4	A0A0G2JYU6	Fmnl1	Formin-like 1	A0A0G2JYU6_RAT	1	NaN	NaN
PD7 / VD7	A0A0G2K2S2;P11167	A0A0G2K2S2;P11167	0.169136	0.169136	0.0936028	0.228047	12	A0A0G2K2S2;P11167	Slc2a1	Solute carrier family 2, facilitated glucose transporter member 1;Solute carrier family 2, facilitated glucose transporter member 1	A0A0G2K2S2_RAT;GTR1_RAT	3	12.4385	1.12438
PD7 / VD7	D3ZEK8	D3ZEK8	NaN	NaN	0.101309	0.233289	4	D3ZEK8	Dmd	Dystrophin	D3ZEK8_RAT	1	NaN	NaN
PD7 / VD7	Q6TUG0	Q6TUG0	0.0198406	0.0198406	0.0937169	0.228047	48	Q6TUG0	Dnajb11	DnaJ homolog subfamily B member 11	DJB11_RAT	8	1.38474	1.01385
PD7 / VD7	D3ZM09	D3ZM09	0.348695	0.348695	0.0935654	0.228047	8	D3ZM09	Sars2	Seryl-tRNA synthetase 2 (Predicted)	D3ZM09_RAT	2	27.3408	1.27341
PD7 / VD7	F1LMM9;Q07803	F1LMM9;Q07803	-0.126308	0.126308	0.0940415	0.2284	28	F1LMM9;Q07803	Gfm1	Elongation factor G, mitochondrial;Elongation factor G, mitochondrial	F1LMM9_RAT;EFGM_RAT	7	-8.38267	0.916173
PD7 / VD7	F8WFR6;O08730	F8WFR6;O08730	0.17422	0.17422	0.0944822	0.228865	48	F8WFR6;O08730	Gyg1	Glycogenin-1	F8WFR6_RAT;GLYG_RAT	8	12.8354	1.12835
PD7 / VD7	O70593	O70593	-0.432099	0.432099	0.094515	0.228865	12	O70593	Sgta	Small glutamine-rich tetratricopeptide repeat-containing protein alpha	SGTA_RAT	3	-25.8818	0.741182
PD7 / VD7	G3V8U9	G3V8U9	0.0483014	0.0483014	0.094339	0.228865	32	G3V8U9	Psmb4	Proteasome subunit beta	G3V8U9_RAT	6	3.40467	1.03405
PD7 / VD7	A0A0G2JTT2;A0A0G2JUQ5;O55012;Q498N4;Q66WT9	A0A0G2JTT2;A0A0G2JUQ5;O55012;Q498N4;Q66WT9	-0.168951	0.168951	0.0947131	0.229056	32	A0A0G2JTT2;A0A0G2JUQ5;O55012;Q498N4;Q66WT9	Picalm	Phosphatidylinositol binding clathrin assembly protein, isoform CRA_a;Phosphatidylinositol binding clathrin assembly protein, isoform CRA_d;Phosphatidylinositol-binding clathrin assembly protein;Phosphatidylinositol binding clathrin assembly protein, isoform CRA_c;Clathrin-assembly lymphoid myeloid leukemia protein	A0A0G2JTT2_RAT;A0A0G2JUQ5_RAT;PICAL_RAT;Q498N4_RAT;Q66WT9_RAT	7	-11.0511	0.889489
PD7 / VD7	A0A0G2K714;Q6AYE2	A0A0G2K714;Q6AYE2	0.201255	0.201255	0.0950637	0.229056	28	A0A0G2K714;Q6AYE2	Sh3glb1	Endophilin-B1	A0A0G2K714_RAT;SHLB1_RAT	7	14.9698	1.1497
PD7 / VD7	B4F786	B4F786	NaN	NaN	0.103287	0.234489	4	B4F786	Cd2bp2	CD2 antigen (Cytoplasmic tail) binding protein 2 (Predicted), isoform CRA_a	B4F786_RAT	1	NaN	NaN
PD7 / VD7	Q6AXM8	Q6AXM8	-0.351416	0.351416	0.0949847	0.229056	32	Q6AXM8	Pon2	Serum paraoxonase/arylesterase 2	PON2_RAT	6	-21.6185	0.783815
PD7 / VD7	P62142	P62142	-0.139773	0.139773	0.0949186	0.229056	32	P62142	Ppp1cb	Serine/threonine-protein phosphatase PP1-beta catalytic subunit	PP1B_RAT	6	-9.23383	0.907662
PD7 / VD7	Q6AYQ8	Q6AYQ8	-0.482745	0.482745	0.0950485	0.229056	12	Q6AYQ8	Fahd1	Acylpyruvase FAHD1, mitochondrial	FAHD1_RAT	3	-28.4385	0.715615
PD7 / VD7	F1LW91	F1LW91	0.0974193	0.0974193	0.0953224	0.229225	120	F1LW91	Numa1	Nuclear mitotic apparatus protein 1	F1LW91_RAT	26	6.9858	1.06986
PD7 / VD7	Q68FP9	Q68FP9	-0.541141	0.541141	0.0952933	0.229225	12	Q68FP9	Cog6	Conserved oligomeric Golgi complex subunit 6	COG6_RAT	3	-31.2773	0.687227
PD7 / VD7	A0A0G2JTG7	A0A0G2JTG7	0.0583074	0.0583074	0.0956502	0.229667	76	A0A0G2JTG7	Hnrnph1	Heterogeneous nuclear ribonucleoprotein H	A0A0G2JTG7_RAT	13	4.12435	1.04124
PD7 / VD7	Q80W98	Q80W98	-0.225174	0.225174	0.0957574	0.229667	12	Q80W98	Sgtb	Small glutamine-rich tetratricopeptide repeat-containing protein beta	SGTB_RAT	3	-14.4508	0.855492
PD7 / VD7	F1LXA0	F1LXA0	0.149482	0.149482	0.0962838	0.229723	36	F1LXA0	Ndufa12	NADH dehydrogenase [ubiquinone] 1 alpha subcomplex subunit 12	F1LXA0_RAT	6	10.9171	1.10917
PD7 / VD7	P63245	P63245	-0.0227889	0.0227889	0.095961	0.229723	116	P63245	Rack1	Receptor of activated protein C kinase 1	RACK1_RAT	18	-1.5672	0.984328
PD7 / VD7	P80254	P80254	-0.150186	0.150186	0.0962653	0.229723	36	P80254	Ddt	D-dopachrome decarboxylase	DOPD_RAT	6	-9.88656	0.901134
PD7 / VD7	A0A0G2JSQ1;Q63754	A0A0G2JSQ1;Q63754	0.102731	0.102731	0.096098	0.229723	16	A0A0G2JSQ1;Q63754	Sncb	Beta-synuclein	A0A0G2JSQ1_RAT;SYUB_RAT	3	7.38041	1.0738
PD7 / VD7	A0A0G2K2V5	A0A0G2K2V5	-0.382164	0.382164	0.0961227	0.229723	16	A0A0G2K2V5	Exoc1	Exocyst complex component 1	A0A0G2K2V5_RAT	4	-23.2714	0.767286
PD7 / VD7	A0A0G2K093;O35162	A0A0G2K093;O35162	-0.866664	0.866664	0.0964058	0.229789	16	A0A0G2K093;O35162	Hspa13	Heat shock 70 kDa protein 13	A0A0G2K093_RAT;HSP13_RAT	4	-45.1587	0.548413
PD7 / VD7	E9PU28	E9PU28	-0.176429	0.176429	0.0966537	0.230047	36	E9PU28	Impdh2	Inosine-5'-monophosphate dehydrogenase 2	IMDH2_RAT	9	-11.5109	0.884891
PD7 / VD7	B2RYS6	B2RYS6	-0.487458	0.487458	0.0967972	0.230047	12	B2RYS6	Prtfdc1	Hypoxanthine phosphoribosyltransferase	B2RYS6_RAT	3	-28.6719	0.713281
PD7 / VD7	A0A0G2JSL2;Q69BT7	A0A0G2JSL2;Q69BT7	-1.06719	1.06719	0.0967064	0.230047	8	A0A0G2JSL2;Q69BT7	Trappc4	RCG58353, isoform CRA_e;Trafficking protein particle complex subunit 4	A0A0G2JSL2_RAT;TPPC4_RAT	2	-52.2752	0.477248
PD7 / VD7	A0A0G2JSU1;A0A0G2K611;A0A0G2KAS7;G3V846;P24942	A0A0G2JSU1;A0A0G2K611;A0A0G2KAS7;G3V846;P24942	-0.906869	0.906869	0.0971034	0.23055	8	A0A0G2JSU1;A0A0G2K611;A0A0G2KAS7;G3V846;P24942	Slc1a3	Amino acid transporter;Amino acid transporter;Amino acid transporter;Amino acid transporter;Excitatory amino acid transporter 1	A0A0G2JSU1_RAT;A0A0G2K611_RAT;A0A0G2KAS7_RAT;G3V846_RAT;EAA1_RAT	2	-46.6659	0.533341
PD7 / VD7	F1LRZ7	F1LRZ7	0.372806	0.372806	0.0976906	0.231242	36	F1LRZ7	Nefh	Neurofilament heavy polypeptide	F1LRZ7_RAT	5	29.4869	1.29487
PD7 / VD7	Q6AYS2	Q6AYS2	NaN	NaN	0.106054	0.236717	4	Q6AYS2	Sfxn1	Sidoreflexin	Q6AYS2_RAT	1	NaN	NaN
PD7 / VD7	D4A3E8	D4A3E8	NaN	NaN	0.106212	0.236717	4	D4A3E8	Mrps27	Mitochondrial ribosomal protein S27	D4A3E8_RAT	1	NaN	NaN
PD7 / VD7	Q3B7D1	Q3B7D1	-0.637096	0.637096	0.0976926	0.231242	12	Q3B7D1	Ube2z	Ubiquitin-conjugating enzyme E2 Z	UBE2Z_RAT	2	-35.6994	0.643006
PD7 / VD7	G3V982	G3V982	-0.191567	0.191567	0.0975353	0.231242	12	G3V982	Elmo2	Engulfment and cell motility 2, ced-12 homolog (C. elegans), isoform CRA_b	G3V982_RAT	3	-12.4346	0.875654
PD7 / VD7	D4A8G5	D4A8G5	0.12201	0.12201	0.0992261	0.231934	181	D4A8G5	Tgfbi	Transforming growth factor, beta-induced	D4A8G5_RAT	28	8.825	1.08825
PD7 / VD7	P68101	P68101	0.107979	0.107979	0.0987674	0.231934	92	P68101	Eif2s1	Eukaryotic translation initiation factor 2 subunit 1	IF2A_RAT	19	7.77174	1.07772
PD7 / VD7	G3V6S8	G3V6S8	NaN	NaN	0.107518	0.238668	4	G3V6S8	Srsf6	Serine/arginine-rich splicing factor 6	SRSF6_RAT	1	NaN	NaN
PD7 / VD7	G3V644	G3V644	-0.12598	0.12598	0.0993315	0.231934	56	G3V644	Ndufv3	NADH dehydrogenase (Ubiquinone) flavoprotein 3-like, isoform CRA_a	G3V644_RAT	8	-8.36188	0.916381
PD7 / VD7	Q5U1Y2	Q5U1Y2	NaN	NaN	0.107779	0.238683	4	Q5U1Y2	Rac2	Rac family small GTPase 2	Q5U1Y2_RAT	1	NaN	NaN
PD7 / VD7	A0A0A0MXU8;Q2IBC5	A0A0A0MXU8;Q2IBC5	-0.394652	0.394652	0.0990722	0.231934	16	A0A0A0MXU8;Q2IBC5	Cav2	Caveolin;Caveolin-2	A0A0A0MXU8_RAT;CAV2_RAT	2	-23.9327	0.760673
PD7 / VD7	P01048	P01048	0.71724	0.71724	0.0994385	0.231934	12	P01048	Map1	T-kininogen 1	KNT1_RAT	3	64.4034	1.64403
PD7 / VD7	F1M8V2	F1M8V2	-0.151099	0.151099	0.0991834	0.231934	60	F1M8V2	Ube4b	Ubiquitination factor E4B	F1M8V2_RAT	14	-9.94355	0.900564
PD7 / VD7	Q6AXX5;Q6TUD3	Q6AXX5;Q6TUD3	-0.178189	0.178189	0.098658	0.231934	24	Q6AXX5;Q6TUD3	Rdh11	Retinol dehydrogenase 11;LRRGT00111	Q6AXX5_RAT;Q6TUD3_RAT	5	-11.6188	0.883812
PD7 / VD7	D4ABP3	D4ABP3	-0.194498	0.194498	0.0985044	0.231934	20	D4ABP3	Cdr2l	Cerebellar degeneration-related protein 2-like	D4ABP3_RAT	5	-12.6123	0.873877
PD7 / VD7	B2RZ96	B2RZ96	NaN	NaN	0.108637	0.239277	4	B2RZ96	Ube2r2	LOC689226 protein	B2RZ96_RAT	1	NaN	NaN
PD7 / VD7	M0RDG7	M0RDG7	0.534975	0.534975	0.0994501	0.231934	20	M0RDG7	Crlf3	Cytokine receptor-like factor 3	M0RDG7_RAT	4	44.8917	1.44892
PD7 / VD7	A0A0G2JYD1;A0A0U1RRQ3	A0A0G2JYD1;A0A0U1RRQ3	-0.26873	0.26873	0.0992948	0.231934	24	A0A0G2JYD1;A0A0U1RRQ3	Ubap2	Ubiquitin-associated protein 2	A0A0G2JYD1_RAT;A0A0U1RRQ3_RAT	6	-16.995	0.83005
PD7 / VD7	Q498U0	Q498U0	NaN	NaN	0.109139	0.239733	4	Q498U0	NaN	Uncharacterized protein C4orf3 homolog	CD003_RAT	1	NaN	NaN
PD7 / VD7	A0A0G2JW34	A0A0G2JW34	-0.580731	0.580731	0.0996006	0.231934	8	A0A0G2JW34	Cisd3	CDGSH iron sulfur domain 3	A0A0G2JW34_RAT	2	-33.1375	0.668625
PD7 / VD7	A0A0G2QC56	A0A0G2QC56	0.0360498	0.0360498	0.0992093	0.231934	16	A0A0G2QC56	Coro2a	Coronin	A0A0G2QC56_RAT	4	2.53026	1.0253
PD7 / VD7	F1LQ00	F1LQ00	-0.439765	0.439765	0.0993197	0.231934	16	F1LQ00	Col5a2	Collagen type V alpha 2 chain	F1LQ00_RAT	3	-26.2745	0.737255
PD7 / VD7	G3V7A5;P35952	G3V7A5;P35952	-0.50893	0.50893	0.0995658	0.231934	24	G3V7A5;P35952	Ldlr	Low density lipoprotein receptor, isoform CRA_a;Low-density lipoprotein receptor	G3V7A5_RAT;LDLR_RAT	5	-29.7257	0.702743
PD7 / VD7	A0A0G2JUB0;Q810F4	A0A0G2JUB0;Q810F4	-0.65626	0.65626	0.099686	0.231934	12	A0A0G2JUB0;Q810F4	Fam3c	Protein FAM3C	A0A0G2JUB0_RAT;FAM3C_RAT	3	-36.5479	0.634521
PD7 / VD7	F1LT36;P63326	F1LT36;P63326	-0.259687	0.259687	0.100301	0.232672	52	F1LT36;P63326	Rps10l1;Rps10	Uncharacterized protein;40S ribosomal protein S10	F1LT36_RAT;RS10_RAT	7	-16.4731	0.835269
PD7 / VD7	Q5U2N2	Q5U2N2	0.0299805	0.0299805	0.100385	0.232672	104	Q5U2N2	Usp14	Ubiquitin specific protease 14	Q5U2N2_RAT	21	2.09983	1.021
PD7 / VD7	P04636	P04636	-0.0165434	0.0165434	0.100721	0.232893	100	P04636	Mdh2	Malate dehydrogenase, mitochondrial	MDHM_RAT	14	-1.14015	0.988598
PD7 / VD7	Q6XVN8	Q6XVN8	NaN	NaN	0.11039	0.240099	8	Q6XVN8	Map1lc3a	Microtubule-associated proteins 1A/1B light chain 3A	MLP3A_RAT	1	NaN	NaN
PD7 / VD7	Q80Z30	Q80Z30	NaN	NaN	0.110158	0.240099	4	Q80Z30	Ppm1e	Protein phosphatase 1E	PPM1E_RAT	1	NaN	NaN
PD7 / VD7	A0A096MKE9;Q5U2M4	A0A096MKE9;Q5U2M4	NaN	NaN	0.110331	0.240099	4	A0A096MKE9;Q5U2M4	Lig3	DNA ligase	A0A096MKE9_RAT;Q5U2M4_RAT	1	NaN	NaN
PD7 / VD7	P53676;Q6IRG9	P53676;Q6IRG9	0.0425527	0.0425527	0.100767	0.232893	44	P53676;Q6IRG9	Ap3m1	AP-3 complex subunit mu-1	AP3M1_RAT;Q6IRG9_RAT	10	2.99346	1.02993
PD7 / VD7	D4A7R3	D4A7R3	2.56866	2.56866	0.100731	0.232893	12	D4A7R3	Nup205	Nucleoporin 205	D4A7R3_RAT	3	493.259	5.93259
PD7 / VD7	F1LWE6	F1LWE6	-0.309033	0.309033	0.100974	0.233149	16	F1LWE6	Msi2	Musashi RNA-binding protein 2	F1LWE6_RAT	4	-19.2817	0.807183
PD7 / VD7	F1LPK7;Q63598	F1LPK7;Q63598	0.177491	0.177491	0.101896	0.233289	132	F1LPK7;Q63598	Pls3	Plastin 3 (T-isoform), isoform CRA_a;Plastin-3	F1LPK7_RAT;PLST_RAT	25	13.0916	1.13092
PD7 / VD7	B5DEM5;F1LSW7;Q63507;Q6TUH8	B5DEM5;F1LSW7;Q63507;Q6TUH8	-0.357435	0.357435	0.101645	0.233289	20	B5DEM5;F1LSW7;Q63507;Q6TUH8	Rpl14;Rpl14;Rpl14;LOC306079	60S ribosomal protein L14;60S ribosomal protein L14;60S ribosomal protein L14;LRRGT00066	B5DEM5_RAT;F1LSW7_RAT;RL14_RAT;Q6TUH8_RAT	3	-21.9449	0.780551
PD7 / VD7	Q4V8C3	Q4V8C3	-0.006532	0.006532	0.101516	0.233289	52	Q4V8C3	Eml1	Echinoderm microtubule-associated protein-like 1	EMAL1_RAT	12	-0.45174	0.995483
PD7 / VD7	G3V774	G3V774	0.243847	0.243847	0.101869	0.233289	88	G3V774	Fbxo2	F-box only protein 2	G3V774_RAT	15	18.4146	1.18415
PD7 / VD7	G3V7I5;Q66HF8	G3V7I5;Q66HF8	NaN	NaN	0.111846	0.241633	4	G3V7I5;Q66HF8	Aldh1b1	Aldehyde dehydrogenase X, mitochondrial;Aldehyde dehydrogenase X, mitochondrial	G3V7I5_RAT;AL1B1_RAT	1	NaN	NaN
PD7 / VD7	Q6AYB2	Q6AYB2	NaN	NaN	0.111919	0.241633	4	Q6AYB2	Sphk2	RCG53912, isoform CRA_a	Q6AYB2_RAT	1	NaN	NaN
PD7 / VD7	A0A140TAJ2;Q63175	A0A140TAJ2;Q63175	NaN	NaN	0.112175	0.241822	4	A0A140TAJ2;Q63175	Serinc5	Serine incorporator 5	A0A140TAJ2_RAT;SERC5_RAT	1	NaN	NaN
PD7 / VD7	A0A0G2K0Q7;D3ZFU9	A0A0G2K0Q7;D3ZFU9	0.150591	0.150591	0.101581	0.233289	28	A0A0G2K0Q7;D3ZFU9	Mylk	Myosin light chain kinase	A0A0G2K0Q7_RAT;D3ZFU9_RAT	7	11.0024	1.11002
PD7 / VD7	F7ENH8	F7ENH8	0.00320191	0.00320191	0.101564	0.233289	20	F7ENH8	Hdac2	Histone deacetylase	F7ENH8_RAT	4	0.222186	1.00222
PD7 / VD7	Q4V7E8	Q4V7E8	0.245423	0.245423	0.101737	0.233289	16	Q4V7E8	Lrrfip2	Leucine-rich repeat flightless-interacting protein 2	LRRF2_RAT	3	18.544	1.18544
PD7 / VD7	P84079	P84079	0.0750098	0.0750098	0.102169	0.233694	77	P84079	Arf1	ADP-ribosylation factor 1	ARF1_RAT	11	5.33682	1.05337
PD7 / VD7	Q4KLF8	Q4KLF8	-0.25242	0.25242	0.102465	0.233972	12	Q4KLF8	Arpc5	Actin-related protein 2/3 complex subunit 5	ARPC5_RAT	3	-16.0513	0.839487
PD7 / VD7	A0A0G2QC33	A0A0G2QC33	-0.173097	0.173097	0.102483	0.233972	24	A0A0G2QC33	Atg4b	Cysteine protease	A0A0G2QC33_RAT	6	-11.3063	0.886937
PD7 / VD7	P21531	P21531	-0.078733	0.078733	0.102698	0.234091	80	P21531	Rpl3	60S ribosomal protein L3	RL3_RAT	11	-5.31111	0.946889
PD7 / VD7	F1M7V6;Q1WIM1	F1M7V6;Q1WIM1	-0.117603	0.117603	0.102727	0.234091	64	F1M7V6;Q1WIM1	Cadm4	Cell adhesion molecule 4	F1M7V6_RAT;CADM4_RAT	10	-7.82825	0.921717
PD7 / VD7	Q6AYK1	Q6AYK1	0.310253	0.310253	0.102932	0.234339	20	Q6AYK1	Rnps1	RNA-binding protein with serine-rich domain 1	RNPS1_RAT	4	23.9925	1.23992
PD7 / VD7	D4ABT8	D4ABT8	0.0825456	0.0825456	0.103208	0.234489	84	D4ABT8	Hnrnpul2	Heterogeneous nuclear ribonucleoprotein U-like 2	D4ABT8_RAT	18	5.88847	1.05888
PD7 / VD7	A0A0H2UHQ0;Q794F9	A0A0H2UHQ0;Q794F9	0.0505234	0.0505234	0.103224	0.234489	48	A0A0H2UHQ0;Q794F9	Slc3a2	4F2 cell-surface antigen heavy chain	A0A0H2UHQ0_RAT;4F2_RAT	10	3.56406	1.03564
PD7 / VD7	A0A0A0MXW1;P35738	A0A0A0MXW1;P35738	-0.291969	0.291969	0.1034	0.234527	16	A0A0A0MXW1;P35738	Bckdhb	2-oxoisovalerate dehydrogenase subunit beta, mitochondrial;2-oxoisovalerate dehydrogenase subunit beta, mitochondrial	A0A0A0MXW1_RAT;ODBB_RAT	4	-18.3214	0.816786
PD7 / VD7	F1LN92	F1LN92	-0.10922	0.10922	0.103505	0.234548	44	F1LN92	Afg3l2	AFG3-like matrix AAA peptidase subunit 2	F1LN92_RAT	11	-7.29106	0.927089
PD7 / VD7	B1WC02	B1WC02	-0.402207	0.402207	0.103626	0.234604	28	B1WC02	Ctps1	CTP synthase	B1WC02_RAT	6	-24.33	0.7567
PD7 / VD7	Q63041	Q63041	0.307136	0.307136	0.103853	0.234849	328	Q63041	A1m	Alpha-1-macroglobulin	A1M_RAT	54	23.7249	1.23725
PD7 / VD7	Q64620	Q64620	-0.278227	0.278227	0.103927	0.234849	36	Q64620	Ppp6c	Serine/threonine-protein phosphatase 6 catalytic subunit	PPP6_RAT	7	-17.5396	0.824604
PD7 / VD7	D4A1H2	D4A1H2	-0.480599	0.480599	0.104386	0.235448	8	D4A1H2	Plcxd3	Phosphatidylinositol-specific phospholipase C, X domain-containing 3	D4A1H2_RAT	2	-28.332	0.71668
PD7 / VD7	Q6P9U3	Q6P9U3	-0.660193	0.660193	0.104337	0.235448	8	Q6P9U3	Commd3	COMM domain-containing protein 3	COMD3_RAT	2	-36.7206	0.632794
PD7 / VD7	D4A0T8	D4A0T8	0.0226029	0.0226029	0.104559	0.235621	32	D4A0T8	Dhrs7	Dehydrogenase/reductase 7	D4A0T8_RAT	7	1.57905	1.01579
PD7 / VD7	P63039	P63039	0.134462	0.134462	0.105006	0.235882	172	P63039	Hspd1	60 kDa heat shock protein, mitochondrial	CH60_RAT	29	9.76837	1.09768
PD7 / VD7	Q5RKJ4	Q5RKJ4	-0.196161	0.196161	0.104912	0.235882	48	Q5RKJ4	Fnta	Farnesyltransferase, CAAX box, alpha	Q5RKJ4_RAT	10	-12.713	0.87287
PD7 / VD7	Q6AZ50	Q6AZ50	-0.0239864	0.0239864	0.104949	0.235882	28	Q6AZ50	Atg3	Ubiquitin-like-conjugating enzyme ATG3	ATG3_RAT	6	-1.64886	0.983511
PD7 / VD7	A0A0G2K6V0;M0R4A5;P37136	A0A0G2K6V0;M0R4A5;P37136	-0.258942	0.258942	0.105062	0.235882	12	A0A0G2K6V0;M0R4A5;P37136	Ache	Carboxylic ester hydrolase;Carboxylic ester hydrolase;Acetylcholinesterase	A0A0G2K6V0_RAT;M0R4A5_RAT;ACES_RAT	3	-16.4299	0.835701
PD7 / VD7	B0K010	B0K010	-0.354431	0.354431	0.105222	0.236024	12	B0K010	Txndc17	Thioredoxin domain-containing 17	B0K010_RAT	3	-21.7822	0.782178
PD7 / VD7	P04642	P04642	0.11339	0.11339	0.105467	0.236354	136	P04642	Ldha	L-lactate dehydrogenase A chain	LDHA_RAT	20	8.17668	1.08177
PD7 / VD7	A0A0G2JTL5;P52873	A0A0G2JTL5;P52873	0.218641	0.218641	0.105862	0.236717	160	A0A0G2JTL5;P52873	Pc	Pyruvate carboxylase, mitochondrial;Pyruvate carboxylase, mitochondrial	A0A0G2JTL5_RAT;PYC_RAT	31	16.3637	1.16364
PD7 / VD7	O08628;Q5RJN2	O08628;Q5RJN2	-0.0989489	0.0989489	0.106048	0.236717	20	O08628;Q5RJN2	Pcolce	Procollagen C-endopeptidase enhancer 1;Pcolce protein	PCOC1_RAT;Q5RJN2_RAT	5	-6.6287	0.933713
PD7 / VD7	P10687	P10687	-0.531432	0.531432	0.106114	0.236717	12	P10687	Plcb1	1-phosphatidylinositol 4,5-bisphosphate phosphodiesterase beta-1	PLCB1_RAT	3	-30.8132	0.691868
PD7 / VD7	A0A0H2UHD8;M0RBZ7;Q925Q9	A0A0H2UHD8;M0RBZ7;Q925Q9	-0.494988	0.494988	0.10597	0.236717	8	A0A0H2UHD8;M0RBZ7;Q925Q9	Sh3kbp1	SH3 domain-containing kinase-binding protein 1	A0A0H2UHD8_RAT;M0RBZ7_RAT;SH3K1_RAT	2	-29.0433	0.709567
PD7 / VD7	A0A0G2K6G2	A0A0G2K6G2	-0.316533	0.316533	0.106552	0.237258	52	A0A0G2K6G2	Apmap	Adipocyte plasma membrane-associated protein	A0A0G2K6G2_RAT	11	-19.7002	0.802998
PD7 / VD7	D4A0T0	D4A0T0	0.0572024	0.0572024	0.106919	0.237857	48	D4A0T0	Ndufb10	NADH:ubiquinone oxidoreductase subunit B10	D4A0T0_RAT	9	4.04462	1.04045
PD7 / VD7	D4AD37;Q7TPJ5	D4AD37;Q7TPJ5	-0.155187	0.155187	0.107152	0.23816	16	D4AD37;Q7TPJ5	Impad1	Inositol monophosphatase 3;Ac2-190	IMPA3_RAT;Q7TPJ5_RAT	4	-10.1984	0.898016
PD7 / VD7	A0A0G2K931;E9PSV5	A0A0G2K931;E9PSV5	0.11596	0.11596	0.107577	0.238668	60	A0A0G2K931;E9PSV5	Psat1	Phosphoserine aminotransferase	A0A0G2K931_RAT;E9PSV5_RAT	14	8.36958	1.0837
PD7 / VD7	D3ZYM6;F1M5A1	D3ZYM6;F1M5A1	NaN	NaN	0.117884	0.246705	4	D3ZYM6;F1M5A1	Calr4	Calreticulin 4	D3ZYM6_RAT;F1M5A1_RAT	1	NaN	NaN
PD7 / VD7	Q6NX65	Q6NX65	-0.192594	0.192594	0.10768	0.238679	20	Q6NX65	Pdcd10	Programmed cell death protein 10	PDC10_RAT	4	-12.4969	0.875031
PD7 / VD7	A0A140TAA4;Q9QZA2	A0A140TAA4;Q9QZA2	0.0725042	0.0725042	0.10803	0.238802	136	A0A140TAA4;Q9QZA2	Pdcd6ip	Programmed cell death 6-interacting protein	A0A140TAA4_RAT;PDC6I_RAT	29	5.15404	1.05154
PD7 / VD7	G3V702;Q99M63	G3V702;Q99M63	-0.323672	0.323672	0.108019	0.238802	12	G3V702;Q99M63	Smu1	Smu-1 suppressor of mec-8 and unc-52 homolog (C. elegans);WD40 repeat-containing protein SMU1	G3V702_RAT;SMU1_RAT	3	-20.0966	0.799034
PD7 / VD7	P62260	P62260	-0.0205296	0.0205296	0.108179	0.238915	136	P62260	Ywhae	14-3-3 protein epsilon	1433E_RAT	19	-1.41292	0.985871
PD7 / VD7	P14604	P14604	-0.0475909	0.0475909	0.108584	0.239277	52	P14604	Echs1	Enoyl-CoA hydratase, mitochondrial	ECHM_RAT	9	-3.24494	0.967551
PD7 / VD7	A0A0G2K824;Q5XIC1	A0A0G2K824;Q5XIC1	-0.864061	0.864061	0.108563	0.239277	8	A0A0G2K824;Q5XIC1	Gmppa	Mannose-1-phosphate guanyltransferase alpha	A0A0G2K824_RAT;GMPPA_RAT	2	-45.0596	0.549404
PD7 / VD7	A0A096MKG7	A0A096MKG7	0.025064	0.025064	0.109086	0.239733	20	A0A096MKG7	Snx12	Sorting nexin 12 (Fragment)	A0A096MKG7_RAT	5	1.75248	1.01752
PD7 / VD7	F1LPC6;Q9JHW1	F1LPC6;Q9JHW1	-0.45404	0.45404	0.109067	0.239733	16	F1LPC6;Q9JHW1	Cpd	Carboxypeptidase D	F1LPC6_RAT;CBPD_RAT	4	-27.0004	0.729996
PD7 / VD7	P04785	P04785	0.107509	0.107509	0.109852	0.239881	144	P04785	P4hb	Protein disulfide-isomerase	PDIA1_RAT	23	7.73664	1.07737
PD7 / VD7	Q99N27	Q99N27	0.241813	0.241813	0.109896	0.239881	64	Q99N27	Snx1	Sorting nexin-1	SNX1_RAT	15	18.2477	1.18248
PD7 / VD7	P62716	P62716	-0.0092195	0.0092195	0.109533	0.239881	52	P62716	Ppp2cb	Serine/threonine-protein phosphatase 2A catalytic subunit beta isoform	PP2AB_RAT	11	-0.637009	0.99363
PD7 / VD7	Q62950	Q62950	-0.0420026	0.0420026	0.10943	0.239881	88	Q62950	Crmp1	Dihydropyrimidinase-related protein 1	DPYL1_RAT	18	-2.86942	0.971306
PD7 / VD7	A0A0G2K777;A1L1L6	A0A0G2K777;A1L1L6	-0.252451	0.252451	0.109858	0.239881	16	A0A0G2K777;A1L1L6	Rhot1	Ras homolog family member T1;Mitochondrial Rho GTPase	A0A0G2K777_RAT;A1L1L6_RAT	4	-16.0531	0.839469
PD7 / VD7	P51146	P51146	-0.190225	0.190225	0.1095	0.239881	28	P51146	Rab4b	Ras-related protein Rab-4B	RAB4B_RAT	7	-12.3531	0.876469
PD7 / VD7	Q5XI86	Q5XI86	-0.588504	0.588504	0.109821	0.239881	12	Q5XI86	Ptrh2	Peptidyl-tRNA hydrolase 2	Q5XI86_RAT	3	-33.4968	0.665032
PD7 / VD7	Q4QQV0	Q4QQV0	0.129917	0.129917	0.110301	0.240099	72	Q4QQV0	Tubb6	Tubulin beta chain	Q4QQV0_RAT	11	9.42305	1.09423
PD7 / VD7	P31211	P31211	-0.352587	0.352587	0.110525	0.240178	16	P31211	Serpina6	Corticosteroid-binding globulin	CBG_RAT	4	-21.6821	0.783179
PD7 / VD7	D3ZC96	D3ZC96	-0.799439	0.799439	0.110807	0.240575	8	D3ZC96	Ttc39b	Tetratricopeptide repeat protein 39B	TT39B_RAT	2	-42.5427	0.574573
PD7 / VD7	A0A0G2JSW6;A0A0G2KAY2	A0A0G2JSW6;A0A0G2KAY2	1.63293	1.63293	0.111113	0.240852	16	A0A0G2JSW6;A0A0G2KAY2	Tnnt3	Troponin T, fast skeletal muscle;Troponin T, fast skeletal muscle	A0A0G2JSW6_RAT;A0A0G2KAY2_RAT	4	210.142	3.10142
PD7 / VD7	A0A0H2UI15;Q0ZCA7	A0A0H2UI15;Q0ZCA7	-0.333063	0.333063	0.111231	0.240852	8	A0A0H2UI15;Q0ZCA7	Clec2l	C-type lectin domain family 2 member L	A0A0H2UI15_RAT;CLC2L_RAT	2	-20.6151	0.793849
PD7 / VD7	B4F774	B4F774	-0.813046	0.813046	0.111205	0.240852	8	B4F774	Gdap1l1	Ganglioside-induced differentiation-associated protein 1-like 1	B4F774_RAT	2	-43.0821	0.569179
PD7 / VD7	A0A0A0MY07;Q9R085	A0A0A0MY07;Q9R085	0.0247244	0.0247244	0.111907	0.241633	52	A0A0A0MY07;Q9R085	Usp15	Ubiquitin carboxyl-terminal hydrolase 15	A0A0A0MY07_RAT;UBP15_RAT	11	1.72854	1.01729
PD7 / VD7	A0A0G2K4I2;D3ZF45	A0A0G2K4I2;D3ZF45	-0.450728	0.450728	0.111988	0.241633	12	A0A0G2K4I2;D3ZF45	Larp4b	La ribonucleoprotein domain family, member 4B;La ribonucleoprotein domain family, member 4B	A0A0G2K4I2_RAT;D3ZF45_RAT	3	-26.8326	0.731674
PD7 / VD7	F1LQ48	F1LQ48	0.0990477	0.0990477	0.112366	0.242019	108	F1LQ48	Hnrnpl	Heterogeneous nuclear ribonucleoprotein L	HNRPL_RAT	19	7.10662	1.07107
PD7 / VD7	Q4KM65	Q4KM65	-0.0255391	0.0255391	0.112602	0.2421	24	Q4KM65	Nudt21	Cleavage and polyadenylation specificity factor subunit 5	CPSF5_RAT	5	-1.75466	0.982453
PD7 / VD7	A0A0G2QC06	A0A0G2QC06	0.129732	0.129732	0.112566	0.2421	260	A0A0G2QC06	Tf	Serotransferrin	A0A0G2QC06_RAT	42	9.40907	1.09409
PD7 / VD7	P32198	P32198	-0.194504	0.194504	0.113165	0.242261	60	P32198	Cpt1a	Carnitine O-palmitoyltransferase 1, liver isoform	CPT1A_RAT	13	-12.6127	0.873873
PD7 / VD7	Q5HZV9	Q5HZV9	0.0342703	0.0342703	0.112808	0.242261	72	Q5HZV9	Ppp1r7	Protein phosphatase 1 regulatory subunit 7	PP1R7_RAT	14	2.40388	1.02404
PD7 / VD7	G3V9U2	G3V9U2	0.265653	0.265653	0.113367	0.242261	128	G3V9U2	Acaa2	3-ketoacyl-CoA thiolase, mitochondrial	G3V9U2_RAT	21	20.218	1.20218
PD7 / VD7	P40615	P40615	0.330291	0.330291	0.113321	0.242261	36	P40615	Dkc1	H/ACA ribonucleoprotein complex subunit DKC1	DKC1_RAT	6	25.7267	1.25727
PD7 / VD7	Q5XIE0	Q5XIE0	-0.0951746	0.0951746	0.113373	0.242261	24	Q5XIE0	Anp32e	Acidic leucine-rich nuclear phosphoprotein 32 family member E	AN32E_RAT	4	-6.3841	0.936159
PD7 / VD7	Q04931	Q04931	-0.182659	0.182659	0.113158	0.242261	20	Q04931	Ssrp1	FACT complex subunit SSRP1	SSRP1_RAT	5	-11.8923	0.881077
PD7 / VD7	A0A0G2JUT1;Q6AYP5	A0A0G2JUT1;Q6AYP5	-0.274427	0.274427	0.113169	0.242261	40	A0A0G2JUT1;Q6AYP5	Cadm1	Cell adhesion molecule 1	A0A0G2JUT1_RAT;CADM1_RAT	8	-17.3221	0.826779
PD7 / VD7	P01836	P01836	0.626211	0.626211	0.113779	0.24274	24	P01836	NaN	Ig kappa chain C region, A allele	KACA_RAT	4	54.3506	1.54351
PD7 / VD7	B2RYN1	B2RYN1	0.107185	0.107185	0.113896	0.24274	20	B2RYN1	Fn3krp	Fructosamine-3-kinase-related protein	B2RYN1_RAT	5	7.71245	1.07712
PD7 / VD7	G3V8V0;O08697	G3V8V0;O08697	-0.0443849	0.0443849	0.113801	0.24274	28	G3V8V0;O08697	Arl2	ADP-ribosylation factor-like protein 2	G3V8V0_RAT;ARL2_RAT	7	-3.02968	0.969703
PD7 / VD7	A0A0G2K290;A0A0G2K3A6	A0A0G2K290;A0A0G2K3A6	NaN	NaN	0.124913	0.253234	8	A0A0G2K290;A0A0G2K3A6	NaN	Uncharacterized protein	A0A0G2K290_RAT;A0A0G2K3A6_RAT	1	NaN	NaN
PD7 / VD7	P81795	P81795	0.0167375	0.0167375	0.114041	0.242836	76	P81795	Eif2s3	Eukaryotic translation initiation factor 2 subunit 3, X-linked	IF2G_RAT	14	1.16691	1.01167
PD7 / VD7	D4A3H5	D4A3H5	-0.137005	0.137005	0.114163	0.242882	20	D4A3H5	Clcn6	Chloride channel protein	D4A3H5_RAT	5	-9.0595	0.909405
PD7 / VD7	P62828	P62828	0.110576	0.110576	0.114383	0.243138	52	P62828	Ran	GTP-binding nuclear protein Ran	RAN_RAT	8	7.96594	1.07966
PD7 / VD7	G3V7L8	G3V7L8	0.121743	0.121743	0.11474	0.243686	48	G3V7L8	Atp6v1e1	ATPase, H+ transporting, V1 subunit E isoform 1, isoform CRA_a	G3V7L8_RAT	10	8.80489	1.08805
PD7 / VD7	A0A0G2JTX7;F1LZF4	A0A0G2JTX7;F1LZF4	0.209016	0.209016	0.114903	0.243819	132	A0A0G2JTX7;F1LZF4	Col6a5	Collagen type VI alpha 5 chain	A0A0G2JTX7_RAT;F1LZF4_RAT	27	15.5899	1.1559
PD7 / VD7	P61765	P61765	0.108237	0.108237	0.115192	0.244058	117	P61765	Stxbp1	Syntaxin-binding protein 1	STXB1_RAT	19	7.79099	1.07791
PD7 / VD7	Q3KRE2	Q3KRE2	-0.188094	0.188094	0.115216	0.244058	20	Q3KRE2	Mettl7a	Methyltransferase like 7A, isoform CRA_b	Q3KRE2_RAT	4	-12.2235	0.877765
PD7 / VD7	A0A096MJM1;Q32PX6	A0A096MJM1;Q32PX6	0.0354492	0.0354492	0.115468	0.244223	44	A0A096MJM1;Q32PX6	Rhog	Ras homolog family member G (Fragment);Ras homolog family member G	A0A096MJM1_RAT;Q32PX6_RAT	8	2.48759	1.02488
PD7 / VD7	P51607	P51607	-0.24059	0.24059	0.115574	0.244223	16	P51607	Renbp	N-acylglucosamine 2-epimerase	RENBP_RAT	4	-15.3601	0.846399
PD7 / VD7	G3V8I4;Q08850	G3V8I4;Q08850	0.338943	0.338943	0.115595	0.244223	16	G3V8I4;Q08850	Stx4	Syntaxin 4A (Placental), isoform CRA_a;Syntaxin-4	G3V8I4_RAT;STX4_RAT	4	26.483	1.26483
PD7 / VD7	Q5FVK6	Q5FVK6	-0.403792	0.403792	0.115765	0.24437	12	Q5FVK6	Cc2d1b	Coiled-coil and C2 domain-containing protein 1B	C2D1B_RAT	3	-24.4131	0.755869
PD7 / VD7	Q5PQT7	Q5PQT7	NaN	NaN	0.127998	0.257051	4	Q5PQT7	Phlda3	Pleckstrin homology-like domain family A member 3	PHLA3_RAT	1	NaN	NaN
PD7 / VD7	D3ZU83	D3ZU83	NaN	NaN	0.128191	0.257228	4	D3ZU83	Ergic3	ERGIC and golgi 3	D3ZU83_RAT	1	NaN	NaN
PD7 / VD7	A0A0H2UHM5;P11598	A0A0H2UHM5;P11598	0.207066	0.207066	0.116256	0.244844	272	A0A0H2UHM5;P11598	Pdia3	Protein disulfide-isomerase;Protein disulfide-isomerase A3	A0A0H2UHM5_RAT;PDIA3_RAT	38	15.4339	1.15434
PD7 / VD7	P20171	P20171	-0.298016	0.298016	0.116109	0.244844	12	P20171	Hras	GTPase HRas	RASH_RAT	2	-18.663	0.81337
PD7 / VD7	Q5M9H2	Q5M9H2	0.137554	0.137554	0.116291	0.244844	132	Q5M9H2	Acadvl	Acyl-Coenzyme A dehydrogenase, very long chain	Q5M9H2_RAT	27	10.0038	1.10004
PD7 / VD7	A0A0G2JSZ1;Q6GQP4	A0A0G2JSZ1;Q6GQP4	-0.631233	0.631233	0.116687	0.24536	8	A0A0G2JSZ1;Q6GQP4	Rab31	Ras-related protein Rab-31	A0A0G2JSZ1_RAT;RAB31_RAT	2	-35.4376	0.645624
PD7 / VD7	D4ADD7	D4ADD7	-0.150349	0.150349	0.116738	0.24536	12	D4ADD7	Glrx5	Glutaredoxin 5	D4ADD7_RAT	2	-9.89673	0.901033
PD7 / VD7	Q6IMX7	Q6IMX7	-0.355118	0.355118	0.11717	0.246057	20	Q6IMX7	Hspbp1	Hsp70-binding protein 1	HPBP1_RAT	5	-21.8194	0.781806
PD7 / VD7	F1LNL2;F1M7H3	F1LNL2;F1M7H3	0.0778596	0.0778596	0.117519	0.246578	8	F1LNL2;F1M7H3	Smarca5;	SWI/SNF related, matrix associated, actin dependent regulator of chromatin, subfamily a, member 5 (Predicted), isoform CRA_a;Uncharacterized protein	F1LNL2_RAT;F1M7H3_RAT	2	5.5451	1.05545
PD7 / VD7	A0A0G2K1S6	A0A0G2K1S6	0.023419	0.023419	0.117756	0.24665	92	A0A0G2K1S6	Me1	Malic enzyme	A0A0G2K1S6_RAT	18	1.63653	1.01637
PD7 / VD7	E9PTB6	E9PTB6	NaN	NaN	0.130405	0.259532	4	E9PTB6	Polr3a	DNA-directed RNA polymerase subunit	E9PTB6_RAT	1	NaN	NaN
PD7 / VD7	P07895	P07895	0.0334857	0.0334857	0.117727	0.24665	60	P07895	Sod2	Superoxide dismutase [Mn], mitochondrial	SODM_RAT	9	2.3482	1.02348
PD7 / VD7	M0R6L9;P02793;Q7TP54	M0R6L9;P02793;Q7TP54	-0.190572	0.190572	0.118048	0.246836	28	M0R6L9;P02793;Q7TP54	;Ftl1;Ripor2	Ferritin;Ferritin light chain 1;Rho family-interacting cell polarization regulator 2	M0R6L9_RAT;FRIL1_RAT;RIPR2_RAT	5	-12.3742	0.876258
PD7 / VD7	D3ZDI9	D3ZDI9	NaN	NaN	0.130639	0.259647	4	D3ZDI9	Usp13	Ubiquitin carboxyl-terminal hydrolase	D3ZDI9_RAT	1	NaN	NaN
PD7 / VD7	F1LX28	F1LX28	-0.424453	0.424453	0.118418	0.247254	8	F1LX28	Acot11	Acyl-CoA thioesterase 11	F1LX28_RAT	2	-25.4879	0.745121
PD7 / VD7	D3ZTR5;M0R785	D3ZTR5;M0R785	-0.348073	0.348073	0.11845	0.247254	8	D3ZTR5;M0R785	Zbed5;LOC100911516	RCG21454;Coiled-coil-helix-coiled-coil-helix domain-containing protein 2, mitochondrial-like	D3ZTR5_RAT;M0R785_RAT	2	-21.4367	0.785633
PD7 / VD7	Q5FVH2	Q5FVH2	0.233547	0.233547	0.119203	0.248612	12	Q5FVH2	Pld3	Phospholipase D3	PLD3_RAT	3	17.5722	1.17572
PD7 / VD7	G3V818;Q9HB97	G3V818;Q9HB97	0.107587	0.107587	0.119334	0.248673	32	G3V818;Q9HB97	Parva	Alpha-parvin	G3V818_RAT;PARVA_RAT	6	7.74245	1.07742
PD7 / VD7	Q561R9	Q561R9	0.388252	0.388252	0.119974	0.24894	12	Q561R9	Lactb2	Endoribonuclease LACTB2	LACB2_RAT	3	30.8806	1.30881
PD7 / VD7	Q68FX9	Q68FX9	-0.169447	0.169447	0.119846	0.24894	20	Q68FX9	Sirt5	NAD-dependent protein deacylase sirtuin-5, mitochondrial	SIR5_RAT	5	-11.0817	0.889183
PD7 / VD7	G3V8U4;M0RBS9;Q8K4V4	G3V8U4;M0RBS9;Q8K4V4	-0.147637	0.147637	0.11983	0.24894	40	G3V8U4;M0RBS9;Q8K4V4	Snx27	Sorting nexin family member 27, isoform CRA_b;Sorting nexin family member 27, isoform CRA_a;Sorting nexin-27	G3V8U4_RAT;M0RBS9_RAT;SNX27_RAT	10	-9.72721	0.902728
PD7 / VD7	A0A0G2K0B0;Q5XIM5	A0A0G2K0B0;Q5XIM5	-0.268954	0.268954	0.119912	0.24894	16	A0A0G2K0B0;Q5XIM5	Cdv3	Protein CDV3 homolog	A0A0G2K0B0_RAT;CDV3_RAT	3	-17.0079	0.829921
PD7 / VD7	B2GUZ3	B2GUZ3	0.27215	0.27215	0.120333	0.249473	76	B2GUZ3	Mthfd1l	Methylenetetrahydrofolate dehydrogenase (NADP+-dependent) 1-like	B2GUZ3_RAT	18	20.7606	1.20761
PD7 / VD7	P27605	P27605	-0.0981855	0.0981855	0.120515	0.249638	36	P27605	Hprt1	Hypoxanthine-guanine phosphoribosyltransferase	HPRT_RAT	8	-6.57928	0.934207
PD7 / VD7	Q8K4D8	Q8K4D8	-0.284782	0.284782	0.121106	0.250649	16	Q8K4D8	Aldh1a3	Aldehyde dehydrogenase family 1 member A3	AL1A3_RAT	4	-17.9134	0.820866
PD7 / VD7	P14669	P14669	0.0901668	0.0901668	0.121387	0.250681	64	P14669	Anxa3	Annexin A3	ANXA3_RAT	12	6.44932	1.06449
PD7 / VD7	B2GV06	B2GV06	0.165297	0.165297	0.12143	0.250681	72	B2GV06	Oxct1	Succinyl-CoA:3-ketoacid coenzyme A transferase 1, mitochondrial	SCOT1_RAT	13	12.1397	1.1214
PD7 / VD7	Q63448	Q63448	-0.0664202	0.0664202	0.121346	0.250681	44	Q63448	Acox3	Peroxisomal acyl-coenzyme A oxidase 3	ACOX3_RAT	10	-4.49953	0.955005
PD7 / VD7	A0A0G2K1D2	A0A0G2K1D2	-0.0306089	0.0306089	0.121767	0.250886	140	A0A0G2K1D2	Rap1gds1	RAP1, GTP-GDP dissociation stimulator 1 (Predicted), isoform CRA_a	A0A0G2K1D2_RAT	23	-2.0993	0.979007
PD7 / VD7	Q8CGU6	Q8CGU6	-0.566317	0.566317	0.121838	0.250886	20	Q8CGU6	Ncstn	Nicastrin	NICA_RAT	5	-32.4661	0.675339
PD7 / VD7	D3ZDU2	D3ZDU2	0.725072	0.725072	0.121974	0.250953	8	D3ZDU2	Rptor	Regulatory-associated protein of MTOR, complex 1	D3ZDU2_RAT	2	65.2983	1.65298
PD7 / VD7	Q6P6S5	Q6P6S5	NaN	NaN	0.133407	0.261258	4	Q6P6S5	Wrb	Tail-anchored protein insertion receptor WRB	WRB_RAT	1	NaN	NaN
PD7 / VD7	D3ZWD6	D3ZWD6	-0.0417558	0.0417558	0.122802	0.251368	20	D3ZWD6	C8a	Complement C8 alpha chain	D3ZWD6_RAT	5	-2.85281	0.971472
PD7 / VD7	D4A8H3	D4A8H3	0.0215952	0.0215952	0.122835	0.251368	60	D4A8H3	Uba6	Similar to RIKEN cDNA 5730469D23 (Predicted)	D4A8H3_RAT	14	1.50813	1.01508
PD7 / VD7	G3V9Z3;P21396	G3V9Z3;P21396	-0.0345124	0.0345124	0.122792	0.251368	80	G3V9Z3;P21396	Maoa	Amine oxidase;Amine oxidase [flavin-containing] A	G3V9Z3_RAT;AOFA_RAT	16	-2.36383	0.976362
PD7 / VD7	D4A3I4	D4A3I4	-0.179473	0.179473	0.122455	0.251368	20	D4A3I4	Btf3l4	Transcription factor BTF3	D4A3I4_RAT	4	-11.6975	0.883025
PD7 / VD7	O08838	O08838	0.0956707	0.0956707	0.122791	0.251368	72	O08838	Amph	Amphiphysin	AMPH_RAT	16	6.85621	1.06856
PD7 / VD7	Q91ZW6	Q91ZW6	-0.330054	0.330054	0.122487	0.251368	12	Q91ZW6	Tmlhe	Trimethyllysine dioxygenase, mitochondrial	TMLH_RAT	3	-20.4493	0.795507
PD7 / VD7	Q5RK19	Q5RK19	0.326103	0.326103	0.122898	0.251368	8	Q5RK19	Snf8	Vacuolar-sorting protein SNF8	SNF8_RAT	2	25.3623	1.25362
PD7 / VD7	B2RZ37	B2RZ37	-0.00976703	0.00976703	0.123482	0.252298	28	B2RZ37	Reep5	Receptor expression-enhancing protein 5	REEP5_RAT	5	-0.674713	0.993253
PD7 / VD7	A0A0G2JSR4;A0A0G2JXI4	A0A0G2JSR4;A0A0G2JXI4	-0.23237	0.23237	0.12356	0.252298	24	A0A0G2JSR4;A0A0G2JXI4	Stat5b	Signal transducer and activator of transcription	A0A0G2JSR4_RAT;A0A0G2JXI4_RAT	6	-14.8765	0.851235
PD7 / VD7	A0A0G2JWX1;F1LMZ8	A0A0G2JWX1;F1LMZ8	0.0354317	0.0354317	0.123699	0.252371	132	A0A0G2JWX1;F1LMZ8	Psmd11	26S proteasome non-ATPase regulatory subunit 11	A0A0G2JWX1_RAT;PSD11_RAT	24	2.48635	1.02486
PD7 / VD7	Q5U2U7	Q5U2U7	-0.120622	0.120622	0.123821	0.252409	36	Q5U2U7	Rnmt	mRNA cap guanine-N7 methyltransferase	MCES_RAT	8	-8.02088	0.919791
PD7 / VD7	Q63610	Q63610	-0.0574928	0.0574928	0.124268	0.25289	52	Q63610	Tpm3	Tropomyosin alpha-3 chain	TPM3_RAT	9	-3.90674	0.960933
PD7 / VD7	D4ADD8	D4ADD8	-0.276312	0.276312	0.124369	0.25289	12	D4ADD8	Dctn6	Dynactin 6 (Predicted), isoform CRA_b	D4ADD8_RAT	3	-17.4301	0.825699
PD7 / VD7	Q6AXX6	Q6AXX6	0.057878	0.057878	0.124344	0.25289	32	Q6AXX6	Prxl2a	Peroxiredoxin-like 2A	PXL2A_RAT	7	4.09335	1.04093
PD7 / VD7	D3ZUI1	D3ZUI1	-0.222972	0.222972	0.124575	0.253098	12	D3ZUI1	Apip	Methylthioribulose-1-phosphate dehydratase	D3ZUI1_RAT	2	-14.3202	0.856798
PD7 / VD7	P40307	P40307	0.0697988	0.0697988	0.124954	0.253234	40	P40307	Psmb2	Proteasome subunit beta type-2	PSB2_RAT	6	4.95703	1.04957
PD7 / VD7	P00406	P00406	0.363378	0.363378	0.124873	0.253234	28	P00406	Mtco2	Cytochrome c oxidase subunit 2	COX2_RAT	5	28.6435	1.28643
PD7 / VD7	D4A249	D4A249	-0.275359	0.275359	0.125257	0.253637	12	D4A249	Mblac2	Metallo-beta-lactamase domain-containing 2	D4A249_RAT	3	-17.3755	0.826245
PD7 / VD7	O54922	O54922	0.177288	0.177288	0.125815	0.254477	32	O54922	Exoc7	Exocyst complex component 7	EXOC7_RAT	8	13.0757	1.13076
PD7 / VD7	A0A0G2K2M9	A0A0G2K2M9	0.273569	0.273569	0.126013	0.254534	24	A0A0G2K2M9	Srrm2	Serine/arginine repetitive matrix 2	A0A0G2K2M9_RAT	6	20.8794	1.20879
PD7 / VD7	Q3T1J2	Q3T1J2	-0.547238	0.547238	0.126704	0.255717	8	Q3T1J2	Mboat2	Membrane-bound O-acyltransferase domain-containing protein 2	MBOA2_RAT	2	-31.5671	0.684329
PD7 / VD7	Q5EGY4	Q5EGY4	0.0742106	0.0742106	0.127116	0.256125	40	Q5EGY4	Ykt6	Synaptobrevin homolog YKT6	YKT6_RAT	7	5.27849	1.05278
PD7 / VD7	O35532	O35532	-0.0510545	0.0510545	0.127089	0.256125	16	O35532	Msmo1	Methylsterol monooxygenase 1	MSMO1_RAT	3	-3.47694	0.965231
PD7 / VD7	Q4V794	Q4V794	NaN	NaN	0.136247	0.261336	4	Q4V794	Vps37a	Similar to DNA segment, Chr 8, ERATO Doi 531, expressed, isoform CRA_c	Q4V794_RAT	1	NaN	NaN
PD7 / VD7	D4A644	D4A644	0.363471	0.363471	0.127303	0.25629	28	D4A644	Map7d1	MAP7 domain-containing 1	D4A644_RAT	7	28.6518	1.28652
PD7 / VD7	Q5M9H7	Q5M9H7	-0.214454	0.214454	0.127833	0.256947	36	Q5M9H7	Dnaja2	DnaJ (Hsp40) homolog, subfamily A, member 2	Q5M9H7_RAT	8	-13.8128	0.861872
PD7 / VD7	D3ZF54	D3ZF54	-0.0167267	0.0167267	0.127841	0.256947	28	D3ZF54	Ano10	Anoctamin	D3ZF54_RAT	7	-1.15271	0.988473
PD7 / VD7	A0A0G2JVD6;A0A0G2K913;A0A140UHX4;P80385	A0A0G2JVD6;A0A0G2K913;A0A140UHX4;P80385	NaN	NaN	0.136633	0.261561	4	A0A0G2JVD6;A0A0G2K913;A0A140UHX4;P80385	Kmt2d;Prkag1;Prkag2;Prkag1	5'-AMP-activated protein kinase subunit gamma-1;5'-AMP-activated protein kinase subunit gamma-1;Protein kinase AMP-activated non-catalytic subunit gamma 2;5'-AMP-activated protein kinase subunit gamma-1	A0A0G2JVD6_RAT;A0A0G2K913_RAT;A0A140UHX4_RAT;AAKG1_RAT	1	NaN	NaN
PD7 / VD7	D3ZB78	D3ZB78	0.0935707	0.0935707	0.128358	0.257351	52	D3ZB78	Phf24	PHD finger protein 24	D3ZB78_RAT	12	6.70077	1.06701
PD7 / VD7	Q66H80	Q66H80	0.0336578	0.0336578	0.129079	0.258582	81	Q66H80	Arcn1	Coatomer subunit delta	COPD_RAT	17	2.36041	1.0236
PD7 / VD7	P04692	P04692	0.0324539	0.0324539	0.129188	0.258588	40	P04692	Tpm1	Tropomyosin alpha-1 chain	TPM1_RAT	8	2.27503	1.02275
PD7 / VD7	P63045	P63045	NaN	NaN	0.137449	0.262402	8	P63045	Vamp2	Vesicle-associated membrane protein 2	VAMP2_RAT	1	NaN	NaN
PD7 / VD7	O35095	O35095	-0.127471	0.127471	0.129376	0.258686	68	O35095	Ncdn	Neurochondrin	NCDN_RAT	14	-8.45651	0.915435
PD7 / VD7	Q6AYT3	Q6AYT3	0.237546	0.237546	0.129555	0.258686	132	Q6AYT3	Rtcb	tRNA-splicing ligase RtcB homolog	RTCB_RAT	23	17.8985	1.17899
PD7 / VD7	G3V829	G3V829	-0.22973	0.22973	0.129555	0.258686	24	G3V829	Fubp3	Far upstream element-binding protein 3	G3V829_RAT	6	-14.7205	0.852795
PD7 / VD7	D3ZJ01	D3ZJ01	-0.4036	0.4036	0.12977	0.258903	20	D3ZJ01	Relch	RAB11-binding and LisH domain, coiled-coil and HEAT repeat-containing	D3ZJ01_RAT	5	-24.403	0.75597
PD7 / VD7	D4A4H5	D4A4H5	-0.382943	0.382943	0.130006	0.259161	20	D4A4H5	Sdf2	Stromal cell derived factor 2 (Predicted), isoform CRA_b	D4A4H5_RAT	4	-23.3128	0.766872
PD7 / VD7	P48508	P48508	0.10152	0.10152	0.130305	0.259532	32	P48508	Gclm	Glutamate--cysteine ligase regulatory subunit	GSH0_RAT	6	7.29033	1.0729
PD7 / VD7	D3ZFQ8	D3ZFQ8	0.102146	0.102146	0.130676	0.259647	52	D3ZFQ8	Cyc1	Cytochrome c-1	D3ZFQ8_RAT	10	7.33686	1.07337
PD7 / VD7	F1LNY3;P13596	F1LNY3;P13596	0.113234	0.113234	0.131313	0.259709	131	F1LNY3;P13596	Ncam1	Neural cell adhesion molecule 1	F1LNY3_RAT;NCAM1_RAT	22	8.16498	1.08165
PD7 / VD7	P18163	P18163	0.155026	0.155026	0.131092	0.259709	68	P18163	Acsl1	Long-chain-fatty-acid--CoA ligase 1	ACSL1_RAT	16	11.3442	1.11344
PD7 / VD7	Q6DGG1	Q6DGG1	-0.0292317	0.0292317	0.131454	0.259709	20	Q6DGG1	Abhd14b	Protein ABHD14B	ABHEB_RAT	5	-2.0058	0.979942
PD7 / VD7	D3ZLK9;D4AAT7	D3ZLK9;D4AAT7	-0.0142727	0.0142727	0.130974	0.259709	36	D3ZLK9;D4AAT7	Naxd	ATP-dependent (S)-NAD(P)H-hydrate dehydratase	D3ZLK9_RAT;NNRD_RAT	9	-0.984429	0.990156
PD7 / VD7	Q6AY48	Q6AY48	-0.220495	0.220495	0.131412	0.259709	40	Q6AY48	Pcbp3	Poly(rC)-binding protein 3	Q6AY48_RAT	8	-14.1729	0.858271
PD7 / VD7	Q8R4I6	Q8R4I6	0.492987	0.492987	0.13101	0.259709	68	Q8R4I6	Actn3	Actinin alpha 3	Q8R4I6_RAT	15	40.7356	1.40736
PD7 / VD7	F7FF30;Q3MIB4	F7FF30;Q3MIB4	NaN	NaN	0.139852	0.264093	4	F7FF30;Q3MIB4	Lonp2	Lon protease homolog;Lon protease homolog 2, peroxisomal	F7FF30_RAT;LONP2_RAT	1	NaN	NaN
PD7 / VD7	D3ZGY1	D3ZGY1	-0.585752	0.585752	0.131273	0.259709	8	D3ZGY1	Pym1	PYM homolog 1, exon junction complex-associated factor	D3ZGY1_RAT	2	-33.3698	0.666302
PD7 / VD7	Q7TNZ9	Q7TNZ9	0.404301	0.404301	0.13169	0.259965	12	Q7TNZ9	Cmtm6	CKLF-like MARVEL transmembrane domain-containing 6	Q7TNZ9_RAT	2	32.3448	1.32345
PD7 / VD7	M0RAR2	M0RAR2	0.206536	0.206536	0.132102	0.260147	44	M0RAR2	NaN	Uncharacterized protein	M0RAR2_RAT	8	15.3915	1.15391
PD7 / VD7	Q6AYB5	Q6AYB5	-0.379072	0.379072	0.131997	0.260147	40	Q6AYB5	Srp54	Signal recognition particle 54 kDa protein	SRP54_RAT	9	-23.1068	0.768932
PD7 / VD7	P67874	P67874	-0.0668821	0.0668821	0.132042	0.260147	25	P67874	Csnk2b	Casein kinase II subunit beta	CSK2B_RAT	6	-4.53009	0.954699
PD7 / VD7	F1M949	F1M949	-0.0359385	0.0359385	0.132251	0.260228	68	F1M949	Ckap5	Cytoskeleton-associated protein 5	F1M949_RAT	17	-2.46029	0.975397
PD7 / VD7	D3ZJR1	D3ZJR1	-0.641947	0.641947	0.132407	0.260326	80	D3ZJR1	Eps15l1	Epidermal growth factor receptor pathway substrate 15-like 1	D3ZJR1_RAT	19	-35.9153	0.640847
PD7 / VD7	A0A0G2JYU0;A0A0G2JYY7;A1A5R1;D3ZSL1	A0A0G2JYU0;A0A0G2JYY7;A1A5R1;D3ZSL1	-0.755465	0.755465	0.132713	0.260717	12	A0A0G2JYU0;A0A0G2JYY7;A1A5R1;D3ZSL1	Rbfox1;Rbfox2;Rbfox2;Rbfox1	RNA binding protein fox-1 homolog;RNA binding protein fox-1 homolog;RNA binding protein fox-1 homolog 2;RNA binding protein fox-1 homolog	A0A0G2JYU0_RAT;A0A0G2JYY7_RAT;RFOX2_RAT;D3ZSL1_RAT	3	-40.7645	0.592355
PD7 / VD7	D4A0A1	D4A0A1	0.32222	0.32222	0.133183	0.261258	44	D4A0A1	Soga3	SOGA family member 3	D4A0A1_RAT	11	25.0253	1.25025
PD7 / VD7	G3V7P2	G3V7P2	0.0584296	0.0584296	0.133324	0.261258	24	G3V7P2	Fgl2	Fibrinogen-like 2	G3V7P2_RAT	5	4.13316	1.04133
PD7 / VD7	P68182	P68182	-0.230201	0.230201	0.133417	0.261258	16	P68182	Prkacb	cAMP-dependent protein kinase catalytic subunit beta	KAPCB_RAT	3	-14.7484	0.852516
PD7 / VD7	G3V6L4	G3V6L4	0.258771	0.258771	0.133699	0.261318	144	G3V6L4	Kif5c	Kinesin-like protein	G3V6L4_RAT	28	19.6459	1.19646
PD7 / VD7	F1MA87	F1MA87	NaN	NaN	0.142362	0.266848	4	F1MA87	Cdk6	Cyclin-dependent kinase 6	F1MA87_RAT	1	NaN	NaN
PD7 / VD7	P08934	P08934	0.187501	0.187501	0.133781	0.261318	20	P08934	Kng1	Kininogen-1	KNG1_RAT	5	13.8789	1.13879
PD7 / VD7	Q5XIM9	Q5XIM9	0.233501	0.233501	0.133985	0.261318	180	Q5XIM9	Cct2	T-complex protein 1 subunit beta	TCPB_RAT	30	17.5685	1.17568
PD7 / VD7	P11348	P11348	0.254299	0.254299	0.13366	0.261318	64	P11348	Qdpr	Dihydropteridine reductase	DHPR_RAT	11	19.2756	1.19276
PD7 / VD7	Q63186	Q63186	0.255044	0.255044	0.13395	0.261318	28	Q63186	Eif2b4	Translation initiation factor eIF-2B subunit delta	EI2BD_RAT	7	19.3372	1.19337
PD7 / VD7	A0A0G2JTN4	A0A0G2JTN4	0.287769	0.287769	0.135708	0.261336	96	A0A0G2JTN4	Pfas	Phosphoribosylformylglycinamidine synthase	A0A0G2JTN4_RAT	22	22.0751	1.22075
PD7 / VD7	P61972	P61972	-0.0592288	0.0592288	0.13468	0.261336	28	P61972	Nutf2	Nuclear transport factor 2	NTF2_RAT	5	-4.02229	0.959777
PD7 / VD7	Q68FT7	Q68FT7	0.309514	0.309514	0.134962	0.261336	120	Q68FT7	Farsb	Phenylalanyl-tRNA synthetase subunit beta	Q68FT7_RAT	26	23.929	1.23929
PD7 / VD7	Q9Z1N4	Q9Z1N4	0.0388736	0.0388736	0.135007	0.261336	52	Q9Z1N4	Bpnt1	3'(2'),5'-bisphosphate nucleotidase 1	BPNT1_RAT	11	2.73114	1.02731
PD7 / VD7	Q5M9I5	Q5M9I5	NaN	NaN	0.145215	0.269622	4	Q5M9I5	Uqcrh	Cytochrome b-c1 complex subunit 6, mitochondrial	QCR6_RAT	1	NaN	NaN
PD7 / VD7	F1M8E9;P00697	F1M8E9;P00697	-0.28229	0.28229	0.135256	0.261336	16	F1M8E9;P00697	Lyz2;Lyz1	Lysozyme;Lysozyme C-1	F1M8E9_RAT;LYSC1_RAT	3	-17.7715	0.822285
PD7 / VD7	A0A0G2K5L2	A0A0G2K5L2	-0.115601	0.115601	0.136123	0.261336	32	A0A0G2K5L2	LOC100911440	RCG47744, isoform CRA_c	A0A0G2K5L2_RAT	7	-7.7002	0.922998
PD7 / VD7	D4A9D8	D4A9D8	0.0262805	0.0262805	0.135175	0.261336	40	D4A9D8	Osbp	Oxysterol-binding protein	D4A9D8_RAT	8	1.83832	1.01838
PD7 / VD7	A0A0G2JT23;D3ZA69	A0A0G2JT23;D3ZA69	-0.288897	0.288897	0.134563	0.261336	28	A0A0G2JT23;D3ZA69	Nrbp2	Nuclear receptor-binding protein 2	A0A0G2JT23_RAT;D3ZA69_RAT	7	-18.1472	0.818528
PD7 / VD7	Q920L7	Q920L7	NaN	NaN	0.146309	0.270621	4	Q920L7	Elovl5	Elongation of very long chain fatty acids protein 5	ELOV5_RAT	1	NaN	NaN
PD7 / VD7	D3ZK56	D3ZK56	NaN	NaN	0.146438	0.270655	4	D3ZK56	Rap2c	RAP2C, member of RAS oncogene family	D3ZK56_RAT	1	NaN	NaN
PD7 / VD7	A0A0G2K1E3	A0A0G2K1E3	NaN	NaN	0.146884	0.271274	4	A0A0G2K1E3	Kmt2b	Histone-lysine N-methyltransferase	A0A0G2K1E3_RAT	1	NaN	NaN
PD7 / VD7	A0A0G2K0P1;D3ZWA5	A0A0G2K0P1;D3ZWA5	-0.177756	0.177756	0.135688	0.261336	16	A0A0G2K0P1;D3ZWA5	Kifap3	Kinesin-associated protein 3	A0A0G2K0P1_RAT;D3ZWA5_RAT	4	-11.5923	0.884077
PD7 / VD7	P80067	P80067	-0.393012	0.393012	0.13606	0.261336	16	P80067	Ctsc	Dipeptidyl peptidase 1	CATC_RAT	4	-23.8462	0.761538
PD7 / VD7	D3ZM57	D3ZM57	0.461489	0.461489	0.134151	0.261336	24	D3ZM57	Golim4	Golgi integral membrane protein 4	D3ZM57_RAT	6	37.6962	1.37696
PD7 / VD7	A0A0G2JU25	A0A0G2JU25	-0.479546	0.479546	0.135461	0.261336	40	A0A0G2JU25	Galnt2	Polypeptide N-acetylgalactosaminyltransferase	A0A0G2JU25_RAT	10	-28.2797	0.717203
PD7 / VD7	P45479	P45479	0.387279	0.387279	0.136185	0.261336	28	P45479	Ppt1	Palmitoyl-protein thioesterase 1	PPT1_RAT	5	30.7924	1.30792
PD7 / VD7	A0A0G2JZZ7	A0A0G2JZZ7	-0.156683	0.156683	0.134353	0.261336	20	A0A0G2JZZ7	Abr	ABR activator of RhoGEF and GTPase	A0A0G2JZZ7_RAT	5	-10.2915	0.897085
PD7 / VD7	Q80W57	Q80W57	NaN	NaN	0.149535	0.27476	4	Q80W57	Abcg2	ATP-binding cassette sub-family G member 2	ABCG2_RAT	1	NaN	NaN
PD7 / VD7	G3V6C3	G3V6C3	-0.285499	0.285499	0.13603	0.261336	12	G3V6C3	Pbdc1	Polysaccharide biosynthesis domain-containing 1	G3V6C3_RAT	3	-17.9542	0.820458
PD7 / VD7	B2RZ27	B2RZ27	-0.0696536	0.0696536	0.135745	0.261336	28	B2RZ27	Sh3bgrl3	SH3 domain binding glutamic acid-rich protein-like 3	B2RZ27_RAT	5	-4.71333	0.952867
PD7 / VD7	Q5U2N0	Q5U2N0	-0.201242	0.201242	0.135179	0.261336	20	Q5U2N0	Ctps2	CTP synthase 2	PYRG2_RAT	5	-13.0199	0.869801
PD7 / VD7	Q6MGB4	Q6MGB4	NaN	NaN	0.150501	0.275451	8	Q6MGB4	Slc39a7	H2-K region expressed gene 4, rat orthologue	Q6MGB4_RAT	1	NaN	NaN
PD7 / VD7	D3ZKG5	D3ZKG5	0.217826	0.217826	0.135738	0.261336	8	D3ZKG5	Parvb	Parvin, beta	D3ZKG5_RAT	2	16.298	1.16298
PD7 / VD7	A0A0G2JZJ5;A0A0G2K2U0;Q5PQL5	A0A0G2JZJ5;A0A0G2K2U0;Q5PQL5	-0.414042	0.414042	0.135912	0.261336	8	A0A0G2JZJ5;A0A0G2K2U0;Q5PQL5	Ptdss1	Phosphatidylserine synthase 1	A0A0G2JZJ5_RAT;A0A0G2K2U0_RAT;PTSS1_RAT	2	-24.9483	0.750517
PD7 / VD7	Q5XI73	Q5XI73	0.168106	0.168106	0.136446	0.261512	72	Q5XI73	Arhgdia	Rho GDP-dissociation inhibitor 1	GDIR1_RAT	9	12.3583	1.12358
PD7 / VD7	D4A1B9;F1LQB2	D4A1B9;F1LQB2	-0.30572	0.30572	0.136686	0.261561	36	D4A1B9;F1LQB2	Smc3	Structural maintenance of chromosomes protein	D4A1B9_RAT;F1LQB2_RAT	9	-19.0962	0.809038
PD7 / VD7	F1LP76	F1LP76	0.056061	0.056061	0.137111	0.262169	32	F1LP76	Elp1	Elongator complex protein 1	F1LP76_RAT	8	3.96234	1.03962
PD7 / VD7	A0A0G2K5P8;Q9JLZ1	A0A0G2K5P8;Q9JLZ1	0.0873233	0.0873233	0.137278	0.262281	76	A0A0G2K5P8;Q9JLZ1	Glrx3	Glutaredoxin-3	A0A0G2K5P8_RAT;GLRX3_RAT	15	6.23973	1.0624
PD7 / VD7	Q9Z2P4	Q9Z2P4	NaN	NaN	0.151352	0.27594	4	Q9Z2P4	Rgcc	Regulator of cell cycle RGCC	RGCC_RAT	1	NaN	NaN
PD7 / VD7	O35821	O35821	0.083798	0.083798	0.138045	0.263334	36	O35821	Mybbp1a	Myb-binding protein 1A	MBB1A_RAT	9	5.98044	1.0598
PD7 / VD7	Q5BJP4	Q5BJP4	0.00556726	0.00556726	0.138709	0.263363	36	Q5BJP4	Rbm39	RNA-binding motif protein 39	Q5BJP4_RAT	9	0.386639	1.00387
PD7 / VD7	G3V8T5	G3V8T5	0.0362366	0.0362366	0.138392	0.263363	80	G3V8T5	Ruvbl2	RuvB-like helicase	G3V8T5_RAT	16	2.54354	1.02544
PD7 / VD7	P08503	P08503	0.244303	0.244303	0.138351	0.263363	60	P08503	Acadm	Medium-chain specific acyl-CoA dehydrogenase, mitochondrial	ACADM_RAT	13	18.4521	1.18452
PD7 / VD7	Q5M9I2	Q5M9I2	-0.400655	0.400655	0.138229	0.263363	28	Q5M9I2	Man2c1	Alpha-mannosidase 2C1	Q5M9I2_RAT	7	-24.2486	0.757514
PD7 / VD7	D3ZZN3	D3ZZN3	0.879619	0.879619	0.138667	0.263363	8	D3ZZN3	Acss1	Acetyl-coenzyme A synthetase	D3ZZN3_RAT	2	83.989	1.83989
PD7 / VD7	A0A0G2JYJ7;Q4QR81	A0A0G2JYJ7;Q4QR81	NaN	NaN	0.15284	0.277022	4	A0A0G2JYJ7;Q4QR81	Rbms2	RNA-binding motif, single stranded-interacting protein 2;RNA binding motif, single stranded interacting protein 2, isoform CRA_a	A0A0G2JYJ7_RAT;Q4QR81_RAT	1	NaN	NaN
PD7 / VD7	P61227	P61227	-0.427791	0.427791	0.138614	0.263363	12	P61227	Rap2b	Ras-related protein Rap-2b	RAP2B_RAT	3	-25.6601	0.743399
PD7 / VD7	B1H232	B1H232	-0.237483	0.237483	0.13903	0.263562	20	B1H232	Islr	Immunoglobulin superfamily-containing leucine-rich repeat	B1H232_RAT	5	-15.1776	0.848224
PD7 / VD7	Q4V8J6	Q4V8J6	0.206044	0.206044	0.138945	0.263562	8	Q4V8J6	Ythdf1	YTH N(6)-methyladenosine RNA-binding protein 1	Q4V8J6_RAT	2	15.352	1.15352
PD7 / VD7	F1LVR4	F1LVR4	-0.343779	0.343779	0.139574	0.263853	20	F1LVR4	Camk1d	Calcium/calmodulin-dependent protein kinase ID	F1LVR4_RAT	5	-21.2025	0.787975
PD7 / VD7	E9PTA4	E9PTA4	NaN	NaN	0.153578	0.277394	4	E9PTA4	Adam9	ADAM metallopeptidase domain 9	E9PTA4_RAT	1	NaN	NaN
PD7 / VD7	Q5U2Z3	Q5U2Z3	0.0575473	0.0575473	0.139617	0.263853	72	Q5U2Z3	Nap1l4	Nucleosome assembly protein 1-like 4	NP1L4_RAT	14	4.0695	1.04069
PD7 / VD7	A0A0G2K5K3;D3ZDB9	A0A0G2K5K3;D3ZDB9	-0.122149	0.122149	0.139578	0.263853	12	A0A0G2K5K3;D3ZDB9	Nmral1	NmrA-like family domain-containing protein 1	A0A0G2K5K3_RAT;D3ZDB9_RAT	3	-8.11817	0.918818
PD7 / VD7	P11661	P11661	-0.496641	0.496641	0.139601	0.263853	12	P11661	Mtnd5	NADH-ubiquinone oxidoreductase chain 5	NU5M_RAT	2	-29.1245	0.708755
PD7 / VD7	D3ZUU6	D3ZUU6	-0.0565814	0.0565814	0.140657	0.265256	12	D3ZUU6	Clec3b	C-type lectin domain family 3, member B	D3ZUU6_RAT	3	-3.84601	0.96154
PD7 / VD7	A0A0G2JTZ9;A0A0G2K251;D4A896;Q4KM08	A0A0G2JTZ9;A0A0G2K251;D4A896;Q4KM08	0.173797	0.173797	0.140686	0.265256	8	A0A0G2JTZ9;A0A0G2K251;D4A896;Q4KM08	Abcg3l1;Abcg3l1;Abcg3l3;Abcg3l1	ATP-binding cassette, subfamily G (WHITE), member 3-like 1;ATP-binding cassette, subfamily G (WHITE), member 3-like 1;ATP-binding cassette, subfamily G (WHITE), member 3-like 3;ATP-binding cassette, sub-family G (WHITE), member 3-like 1	A0A0G2JTZ9_RAT;A0A0G2K251_RAT;D4A896_RAT;Q4KM08_RAT	2	12.8023	1.12802
PD7 / VD7	D3ZI16	D3ZI16	0.0684104	0.0684104	0.141256	0.266125	48	D3ZI16	Cops6	COP9 (Constitutive photomorphogenic) homolog, subunit 6 (Arabidopsis thaliana) (Predicted), isoform CRA_a	D3ZI16_RAT	10	4.85607	1.04856
PD7 / VD7	F7F2F3	F7F2F3	0.161687	0.161687	0.141592	0.26614	88	F7F2F3	Hspa4l	Heat shock 70 kDa protein 4L	F7F2F3_RAT	21	11.8595	1.11859
PD7 / VD7	P02600	P02600	1.93115	1.93115	0.14159	0.26614	40	P02600	Myl1	Myosin light chain 1/3, skeletal muscle isoform	MYL1_RAT	8	281.358	3.81358
PD7 / VD7	D3ZAI6	D3ZAI6	0.0470898	0.0470898	0.141552	0.26614	28	D3ZAI6	Nt5dc3	5'-nucleotidase domain-containing 3	D3ZAI6_RAT	7	3.31787	1.03318
PD7 / VD7	A0A0G2K6E8;E9PSJ4	A0A0G2K6E8;E9PSJ4	-0.252331	0.252331	0.141898	0.266511	52	A0A0G2K6E8;E9PSJ4	Spag9	Sperm-associated antigen 9	A0A0G2K6E8_RAT;E9PSJ4_RAT	10	-16.0461	0.839539
PD7 / VD7	B0K031;P05426	B0K031;P05426	0.288047	0.288047	0.14264	0.266848	104	B0K031;P05426	Rpl7	60S ribosomal protein L7	B0K031_RAT;RL7_RAT	16	22.0987	1.22099
PD7 / VD7	A0A0H2UHQ8;D3ZFA8;P04644	A0A0H2UHQ8;D3ZFA8;P04644	0.129649	0.129649	0.142574	0.266848	44	A0A0H2UHQ8;D3ZFA8;P04644	Rps17;LOC100362366;Rps17	40S ribosomal protein S17;40S ribosomal protein S17-like;40S ribosomal protein S17	A0A0H2UHQ8_RAT;D3ZFA8_RAT;RS17_RAT	7	9.40276	1.09403
PD7 / VD7	Q8CHN6	Q8CHN6	-0.00575094	0.00575094	0.14262	0.266848	32	Q8CHN6	Sgpl1	Sphingosine-1-phosphate lyase 1	SGPL1_RAT	7	-0.397831	0.996022
PD7 / VD7	O35509	O35509	0.00750587	0.00750587	0.142735	0.266848	48	O35509	Rab11b	Ras-related protein Rab-11B	RB11B_RAT	9	0.521623	1.00522
PD7 / VD7	Q02759	Q02759	-0.432591	0.432591	0.142256	0.266848	16	Q02759	Alox15	Arachidonate 15-lipoxygenase	LOX15_RAT	3	-25.907	0.74093
PD7 / VD7	Q9QZA6	Q9QZA6	NaN	NaN	0.157984	0.280042	8	Q9QZA6	Cd151	CD151 antigen	CD151_RAT	1	NaN	NaN
PD7 / VD7	Q3SWS8	Q3SWS8	-0.194042	0.194042	0.14296	0.267064	12	Q3SWS8	Rae1	mRNA export factor	RAE1L_RAT	3	-12.5847	0.874153
PD7 / VD7	D3ZSZ6	D3ZSZ6	0.291488	0.291488	0.143078	0.267078	28	D3ZSZ6	Dgkh	Diacylglycerol kinase	D3ZSZ6_RAT	7	22.3902	1.2239
PD7 / VD7	Q5M819	Q5M819	-0.239385	0.239385	0.143505	0.267639	20	Q5M819	Psph	Phosphoserine phosphatase	SERB_RAT	5	-15.2893	0.847107
PD7 / VD7	Q5RKJ9	Q5RKJ9	-0.309524	0.309524	0.143598	0.267639	28	Q5RKJ9	Rab10	RAB10, member RAS oncogene family	Q5RKJ9_RAT	6	-19.3092	0.806908
PD7 / VD7	Q5XIJ6	Q5XIJ6	-0.353469	0.353469	0.144072	0.268318	8	Q5XIJ6	Babam1	BRISC and BRCA1-A complex member 1	BABA1_RAT	2	-21.73	0.7827
PD7 / VD7	A0A0G2JWZ2	A0A0G2JWZ2	0.0763287	0.0763287	0.144391	0.268707	96	A0A0G2JWZ2	NaN	Amine oxidase	A0A0G2JWZ2_RAT	18	5.43316	1.05433
PD7 / VD7	P05544	P05544	0.108571	0.108571	0.144992	0.269597	148	P05544	Serpina3l	Serine protease inhibitor A3L	SPA3L_RAT	23	7.81598	1.07816
PD7 / VD7	A0A0G2JVM2	A0A0G2JVM2	-0.402375	0.402375	0.145091	0.269597	32	A0A0G2JVM2	Mia3	Uncharacterized protein	A0A0G2JVM2_RAT	7	-24.3389	0.756611
PD7 / VD7	A0A0G2K4G3;Q71UE8	A0A0G2K4G3;Q71UE8	NaN	NaN	0.157354	0.280042	8	A0A0G2K4G3;Q71UE8	Nedd8	NEDD8	A0A0G2K4G3_RAT;NEDD8_RAT	1	NaN	NaN
PD7 / VD7	D4A9P7	D4A9P7	-0.560049	0.560049	0.145523	0.269988	8	D4A9P7	Bola2	BolA family member 2	D4A9P7_RAT	2	-32.1721	0.678279
PD7 / VD7	F1M9B2	F1M9B2	NaN	NaN	0.156484	0.280042	4	F1M9B2	Igfbp7	Insulin-like growth factor binding protein 7, isoform CRA_b	F1M9B2_RAT	1	NaN	NaN
PD7 / VD7	A0A0G2JSH3;Q5RJM1	A0A0G2JSH3;Q5RJM1	NaN	NaN	0.15826	0.280042	4	A0A0G2JSH3;Q5RJM1	Srd5a3	Polyprenol reductase	A0A0G2JSH3_RAT;PORED_RAT	1	NaN	NaN
PD7 / VD7	A0A0G2K994;D3ZBX7	A0A0G2K994;D3ZBX7	NaN	NaN	0.158438	0.280042	4	A0A0G2K994;D3ZBX7	Vsig10	V-set and immunoglobulin domain-containing 10	A0A0G2K994_RAT;D3ZBX7_RAT	1	NaN	NaN
PD7 / VD7	A0A0G2JVP4;F1LM30;F1LPW0	A0A0G2JVP4;F1LM30;F1LPW0	0.174985	0.174985	0.145887	0.270251	40	A0A0G2JVP4;F1LM30;F1LPW0	Ighm	Immunoglobulin heavy constant mu	A0A0G2JVP4_RAT;F1LM30_RAT;F1LPW0_RAT	8	12.8953	1.12895
PD7 / VD7	D3ZD11	D3ZD11	-0.31998	0.31998	0.14584	0.270251	20	D3ZD11	Spcs2	Signal peptidase complex subunit 2	D3ZD11_RAT	5	-19.8919	0.801081
PD7 / VD7	D3ZTH8;F1LT35;P62752	D3ZTH8;F1LT35;P62752	0.314566	0.314566	0.146219	0.270621	52	D3ZTH8;F1LT35;P62752	LOC689899;RGD1564606;Rpl23a	Similar to 60S ribosomal protein L23a;Similar to 60S ribosomal protein L23a;60S ribosomal protein L23a	D3ZTH8_RAT;F1LT35_RAT;RL23A_RAT	8	24.3637	1.24364
PD7 / VD7	D3ZFS2	D3ZFS2	0.109643	0.109643	0.147185	0.271417	64	D3ZFS2	Clgn	Calmegin	D3ZFS2_RAT	11	7.89613	1.07896
PD7 / VD7	Q9ET50	Q9ET50	0.444567	0.444567	0.147109	0.271417	32	Q9ET50	Stau1	Staufen double-stranded RNA-binding protein 1	Q9ET50_RAT	8	36.0905	1.36091
PD7 / VD7	P19527	P19527	0.198867	0.198867	0.148735	0.273861	292	P19527	Nefl	Neurofilament light polypeptide	NFL_RAT	34	14.7797	1.1478
PD7 / VD7	D4AE06	D4AE06	-1.16392	1.16392	0.148674	0.273861	12	D4AE06	Fkbp15	Peptidylprolyl isomerase	D4AE06_RAT	3	-55.3702	0.446298
PD7 / VD7	P37805	P37805	-0.170278	0.170278	0.149136	0.274393	20	P37805	Tagln3	Transgelin-3	TAGL3_RAT	5	-11.1329	0.888671
PD7 / VD7	P39069	P39069	-0.112087	0.112087	0.149562	0.27476	49	P39069	Ak1	Adenylate kinase isoenzyme 1	KAD1_RAT	10	-7.47514	0.925249
PD7 / VD7	Q66H20	Q66H20	-0.0709566	0.0709566	0.150467	0.275451	44	Q66H20	Ptbp2	Polypyrimidine tract-binding protein 2	PTBP2_RAT	10	-4.79935	0.952007
PD7 / VD7	D3ZAQ4	D3ZAQ4	NaN	NaN	0.161132	0.28259	4	D3ZAQ4	Psmg2	Proteasome assembly chaperone 2	D3ZAQ4_RAT	1	NaN	NaN
PD7 / VD7	D4A8C5	D4A8C5	NaN	NaN	0.161427	0.282904	4	D4A8C5	Plcb4	1-phosphatidylinositol 4,5-bisphosphate phosphodiesterase	D4A8C5_RAT	1	NaN	NaN
PD7 / VD7	A0A0G2JX92;D3ZMW5	A0A0G2JX92;D3ZMW5	NaN	NaN	0.161903	0.28333	4	A0A0G2JX92;D3ZMW5	Sh3pxd2a	SH3 and PX domains 2A	A0A0G2JX92_RAT;D3ZMW5_RAT	1	NaN	NaN
PD7 / VD7	Q66H86	Q66H86	-0.236129	0.236129	0.150316	0.275451	32	Q66H86	Olfml1	Olfactomedin-like protein 1	OLFL1_RAT	6	-15.098	0.84902
PD7 / VD7	F1LZW6	F1LZW6	0.214797	0.214797	0.150614	0.275451	36	F1LZW6	Slc25a13	Solute carrier family 25 member 13	F1LZW6_RAT	7	16.054	1.16054
PD7 / VD7	Q66H91	Q66H91	NaN	NaN	0.162558	0.284068	4	Q66H91	Git2	G protein-coupled receptor kinase interacting ArfGAP 2	Q66H91_RAT	1	NaN	NaN
PD7 / VD7	D4AEC2	D4AEC2	-0.252746	0.252746	0.150616	0.275451	12	D4AEC2	Camsap2	Calmodulin-regulated spectrin-associated protein 2	CAMP2_RAT	3	-16.0703	0.839297
PD7 / VD7	Q8CFD0	Q8CFD0	-1.20765	1.20765	0.150359	0.275451	12	Q8CFD0	Sfxn5	Sideroflexin-5	SFXN5_RAT	2	-56.7026	0.432974
PD7 / VD7	A0A0G2K8S9;Q6AYJ9	A0A0G2K8S9;Q6AYJ9	-0.391765	0.391765	0.151089	0.27594	36	A0A0G2K8S9;Q6AYJ9	Art3	NAD(P)(+)--arginine ADP-ribosyltransferase	A0A0G2K8S9_RAT;Q6AYJ9_RAT	7	-23.7804	0.762196
PD7 / VD7	P70541	P70541	-0.194536	0.194536	0.151163	0.27594	32	P70541	Eif2b3	Translation initiation factor eIF-2B subunit gamma	EI2BG_RAT	8	-12.6146	0.873854
PD7 / VD7	Q63357	Q63357	-0.466442	0.466442	0.151257	0.27594	12	Q63357	Myo1d	Unconventional myosin-Id	MYO1D_RAT	3	-27.6253	0.723747
PD7 / VD7	B2RYF6	B2RYF6	-0.0223816	0.0223816	0.15145	0.27594	12	B2RYF6	Clptm1	CLPTM1 regulator of GABA type A receptor forward-trafficking	B2RYF6_RAT	3	-1.53941	0.984606
PD7 / VD7	Q6AXW2	Q6AXW2	0.0402162	0.0402162	0.151776	0.276327	20	Q6AXW2	Tmod3	RCG25684, isoform CRA_a	Q6AXW2_RAT	5	2.82679	1.02827
PD7 / VD7	A0A0G2JSR7	A0A0G2JSR7	0.0019939	0.0019939	0.152527	0.277022	108	A0A0G2JSR7	Matr3	Matrin-3	A0A0G2JSR7_RAT	21	0.138302	1.00138
PD7 / VD7	F1LMA4;P26817	F1LMA4;P26817	-0.739836	0.739836	0.152546	0.277022	12	F1LMA4;P26817	Grk2	G protein-coupled receptor kinase;Beta-adrenergic receptor kinase 1	F1LMA4_RAT;ARBK1_RAT	3	-40.1192	0.598808
PD7 / VD7	A0A0G2JVU1;D3ZP06	A0A0G2JVU1;D3ZP06	-0.230055	0.230055	0.152716	0.277022	20	A0A0G2JVU1;D3ZP06	Itgb8	Integrin beta	A0A0G2JVU1_RAT;D3ZP06_RAT	5	-14.7397	0.852603
PD7 / VD7	D4A3E0	D4A3E0	0.454741	0.454741	0.152751	0.277022	16	D4A3E0	Mmrn1	Multimerin 1	D4A3E0_RAT	4	37.0536	1.37054
PD7 / VD7	F1M5V2	F1M5V2	0.661632	0.661632	0.152442	0.277022	24	F1M5V2	Glipr2	GLI pathogenesis-related 2	F1M5V2_RAT	5	58.1871	1.58187
PD7 / VD7	B1H282	B1H282	0.00985677	0.00985677	0.152998	0.277102	20	B1H282	Colgalt1	Collagen beta(1-O)galactosyltransferase 1	B1H282_RAT	5	0.685558	1.00686
PD7 / VD7	P85834	P85834	0.300839	0.300839	0.153498	0.277394	132	P85834	Tufm	Elongation factor Tu, mitochondrial	EFTU_RAT	21	23.1861	1.23186
PD7 / VD7	D3ZT90	D3ZT90	-0.017156	0.017156	0.153614	0.277394	52	D3ZT90	Gcdh	Glutaryl-CoA dehydrogenase	D3ZT90_RAT	10	-1.18212	0.988179
PD7 / VD7	D3ZUX7	D3ZUX7	-0.457853	0.457853	0.153508	0.277394	20	D3ZUX7	Acsf3	Acyl-CoA synthetase family member 3	D3ZUX7_RAT	4	-27.1931	0.728069
PD7 / VD7	A0A0G2JSG6	A0A0G2JSG6	-0.227016	0.227016	0.154002	0.277796	28	A0A0G2JSG6	Ak2	Adenylate kinase 2, mitochondrial	A0A0G2JSG6_RAT	7	-14.56	0.8544
PD7 / VD7	Q9EPB1	Q9EPB1	0.250406	0.250406	0.154065	0.277796	44	Q9EPB1	Dpp7	Dipeptidyl peptidase 2	DPP2_RAT	9	18.9542	1.18954
PD7 / VD7	Q5U211	Q5U211	0.198577	0.198577	0.154608	0.277951	44	Q5U211	Snx3	Sorting nexin-3	SNX3_RAT	9	14.7566	1.14757
PD7 / VD7	A0A0G2K4T7;Q5U2Y1	A0A0G2K4T7;Q5U2Y1	-0.521301	0.521301	0.154601	0.277951	24	A0A0G2K4T7;Q5U2Y1	Gtf2i	General transcription factor II-I	A0A0G2K4T7_RAT;GTF2I_RAT	6	-30.3257	0.696743
PD7 / VD7	M0RC99	M0RC99	0.179048	0.179048	0.154503	0.277951	48	M0RC99	Rab5a	Ras-related protein Rab-5A	RAB5A_RAT	9	13.2136	1.13214
PD7 / VD7	M0R4H5;P36202	M0R4H5;P36202	-0.460028	0.460028	0.154449	0.277951	32	M0R4H5;P36202	Pdlim4	PDZ and LIM domain protein 4	M0R4H5_RAT;PDLI4_RAT	6	-27.3028	0.726972
PD7 / VD7	Q9JI66	Q9JI66	0.0963697	0.0963697	0.154784	0.278064	36	Q9JI66	Slc4a4	Electrogenic sodium bicarbonate cotransporter 1	S4A4_RAT	7	6.90799	1.06908
PD7 / VD7	P30835	P30835	0.0289112	0.0289112	0.154987	0.278223	56	P30835	Pfkl	ATP-dependent 6-phosphofructokinase, liver type	PFKAL_RAT	13	2.02419	1.02024
PD7 / VD7	P62246	P62246	0.281017	0.281017	0.155298	0.278371	32	P62246	Rps15a	40S ribosomal protein S15a	RS15A_RAT	6	21.5051	1.21505
PD7 / VD7	A0A0G2K2A5;Q5HZY3	A0A0G2K2A5;Q5HZY3	-0.0431075	0.0431075	0.155236	0.278371	24	A0A0G2K2A5;Q5HZY3	Uchl5	Ubiquitin carboxyl-terminal hydrolase	A0A0G2K2A5_RAT;Q5HZY3_RAT	6	-2.94378	0.970562
PD7 / VD7	Q6PDU7	Q6PDU7	0.155216	0.155216	0.155734	0.278948	44	Q6PDU7	Atp5mg	ATP synthase subunit g, mitochondrial	ATP5L_RAT	7	11.3588	1.11359
PD7 / VD7	B2RYN3	B2RYN3	-0.27236	0.27236	0.157477	0.280042	24	B2RYN3	Eef1e1	Eukaryotic translation elongation factor 1 epsilon 1	B2RYN3_RAT	5	-17.2036	0.827964
PD7 / VD7	A0A0G2K051;F1LUA1	A0A0G2K051;F1LUA1	0.182225	0.182225	0.158019	0.280042	124	A0A0G2K051;F1LUA1	Eea1	Early endosome antigen 1	A0A0G2K051_RAT;F1LUA1_RAT	27	13.4632	1.13463
PD7 / VD7	Q0VGK0	Q0VGK0	-0.281561	0.281561	0.156811	0.280042	16	Q0VGK0	Gabarapl1	Gamma-aminobutyric acid receptor-associated protein-like 1	GBRL1_RAT	2	-17.73	0.8227
PD7 / VD7	Q9WVR7	Q9WVR7	-0.241966	0.241966	0.157387	0.280042	56	Q9WVR7	Ppm1f	Protein phosphatase 1F	PPM1F_RAT	11	-15.4408	0.845592
PD7 / VD7	B2GUW7;P50408	B2GUW7;P50408	-0.458224	0.458224	0.157648	0.280042	8	B2GUW7;P50408	Rnase4;Atp6v1f	Rnase4 protein;V-type proton ATPase subunit F	B2GUW7_RAT;VATF_RAT	2	-27.2118	0.727882
PD7 / VD7	F1M392	F1M392	0.0109409	0.0109409	0.15841	0.280042	88	F1M392	Limch1	LIM and calponin homology domains 1	F1M392_RAT	19	0.761245	1.00761
PD7 / VD7	P22509	P22509	-0.166136	0.166136	0.158	0.280042	24	P22509	Fbl	rRNA 2'-O-methyltransferase fibrillarin	FBRL_RAT	5	-10.8774	0.891226
PD7 / VD7	Q5RJR2	Q5RJR2	-0.0673669	0.0673669	0.158225	0.280042	32	Q5RJR2	Twf1	Twinfilin-1	TWF1_RAT	6	-4.56218	0.954378
PD7 / VD7	F1LNS2	F1LNS2	-0.271072	0.271072	0.157246	0.280042	12	F1LNS2	Fam45a	Family with sequence similarity 45, member A	F1LNS2_RAT	3	-17.1296	0.828704
PD7 / VD7	Q6TUD4	Q6TUD4	-0.279971	0.279971	0.157663	0.280042	8	Q6TUD4	Yipf3	Protein YIPF3	YIPF3_RAT	2	-17.6392	0.823608
PD7 / VD7	P34926	P34926	NaN	NaN	0.167383	0.286746	4	P34926	Map1a	Microtubule-associated protein 1A	MAP1A_RAT	1	NaN	NaN
PD7 / VD7	D3ZHG3	D3ZHG3	NaN	NaN	0.168206	0.286746	4	D3ZHG3	Ptk7	Protein tyrosine kinase 7	D3ZHG3_RAT	1	NaN	NaN
PD7 / VD7	F1LWG4	F1LWG4	NaN	NaN	0.166147	0.286746	4	F1LWG4	Ndufaf1	NADH dehydrogenase (Ubiquinone) 1 alpha subcomplex, assembly factor 1 (Predicted), isoform CRA_a	F1LWG4_RAT	1	NaN	NaN
PD7 / VD7	B2RYP6	B2RYP6	0.576637	0.576637	0.15853	0.280042	12	B2RYP6	Luc7l2	LUC7-like 2 (S. cerevisiae)	B2RYP6_RAT	3	49.1369	1.49137
PD7 / VD7	A0A0A0MXZ8;D3ZLZ7	A0A0A0MXZ8;D3ZLZ7	-0.112822	0.112822	0.157245	0.280042	28	A0A0A0MXZ8;D3ZLZ7	Impdh1	Inosine-5'-monophosphate dehydrogenase;Inosine-5'-monophosphate dehydrogenase 1	A0A0A0MXZ8_RAT;IMDH1_RAT	6	-7.52224	0.924778
PD7 / VD7	A0A0H2UHC0;F1LQX4	A0A0H2UHC0;F1LQX4	0.343232	0.343232	0.157261	0.280042	12	A0A0H2UHC0;F1LQX4	Arhgap44	Rho GTPase-activating protein 44	A0A0H2UHC0_RAT;RHG44_RAT	3	26.8595	1.26859
PD7 / VD7	G3V7F6	G3V7F6	-0.592891	0.592891	0.156882	0.280042	8	G3V7F6	RGD1561590	RCG23529, isoform CRA_a	G3V7F6_RAT	2	-33.6987	0.663013
PD7 / VD7	A0A0G2K3Z9;Q63716	A0A0G2K3Z9;Q63716	0.224778	0.224778	0.158931	0.280548	108	A0A0G2K3Z9;Q63716	;Prdx1	Uncharacterized protein;Peroxiredoxin-1	A0A0G2K3Z9_RAT;PRDX1_RAT	15	16.8597	1.1686
PD7 / VD7	O35179	O35179	-0.0772035	0.0772035	0.159087	0.280619	52	O35179	Sh3gl2	Endophilin-A1	SH3G2_RAT	9	-5.21068	0.947893
PD7 / VD7	P17220	P17220	0.0988612	0.0988612	0.15924	0.280687	52	P17220	Psma2	Proteasome subunit alpha type-2	PSA2_RAT	9	7.09278	1.07093
PD7 / VD7	F1M0R2;F1M1N9;F1M305;F1M9R3;F1M9R4	F1M0R2;F1M1N9;F1M305;F1M9R3;F1M9R4	0.43032	0.43032	0.159366	0.280706	24	F1M0R2;F1M1N9;F1M305;F1M9R3;F1M9R4	Abi3bp	ABI family member 3-binding protein	F1M0R2_RAT;F1M1N9_RAT;F1M305_RAT;F1M9R3_RAT;F1M9R4_RAT	6	34.7532	1.34753
PD7 / VD7	F1LU71	F1LU71	-0.10166	0.10166	0.160195	0.281596	48	F1LU71	Auh	Methylglutaconyl-CoA hydratase, mitochondrial	AUHM_RAT	10	-6.80397	0.93196
PD7 / VD7	B2GV41	B2GV41	NaN	NaN	0.171764	0.289763	4	B2GV41	Usp39	Ubiquitin specific protease 39 (Predicted), isoform CRA_b	B2GV41_RAT	1	NaN	NaN
PD7 / VD7	Q6AYS8	Q6AYS8	-0.268031	0.268031	0.160218	0.281596	68	Q6AYS8	Hsd17b11	Estradiol 17-beta-dehydrogenase 11	DHB11_RAT	12	-16.9548	0.830452
PD7 / VD7	P35280	P35280	-0.402414	0.402414	0.160092	0.281596	12	P35280	Rab8a	Ras-related protein Rab-8A	RAB8A_RAT	3	-24.3409	0.756591
PD7 / VD7	D4AEI5	D4AEI5	-0.321336	0.321336	0.160482	0.281855	44	D4AEI5	Myef2	Myelin expression factor 2	D4AEI5_RAT	10	-19.9672	0.800328
PD7 / VD7	F7EPE0;P10960	F7EPE0;P10960	0.324208	0.324208	0.160968	0.282507	40	F7EPE0;P10960	Psap	Prosaposin	F7EPE0_RAT;SAP_RAT	9	25.1977	1.25198
PD7 / VD7	A1L1J8	A1L1J8	-0.0712739	0.0712739	0.161858	0.28333	24	A1L1J8	Rab5b	RAB5B, member RAS oncogene family	A1L1J8_RAT	5	-4.82028	0.951797
PD7 / VD7	Q3B8R6;Q63678	Q3B8R6;Q63678	-0.0391121	0.0391121	0.162487	0.284068	16	Q3B8R6;Q63678	Azgp1	Alpha-2-glycoprotein 1, zinc;Zinc-alpha-2-glycoprotein	Q3B8R6_RAT;ZA2G_RAT	4	-2.67462	0.973254
PD7 / VD7	B0K020	B0K020	0.0442456	0.0442456	0.162718	0.284145	36	B0K020	Cisd1	CDGSH iron-sulfur domain-containing protein 1	CISD1_RAT	5	3.11438	1.03114
PD7 / VD7	Q4G017	Q4G017	-0.342463	0.342463	0.163032	0.284489	12	Q4G017	Nisch	Nischarin	NISCH_RAT	3	-21.1306	0.788694
PD7 / VD7	A0A0H2UI11;P62893	A0A0H2UI11;P62893	NaN	NaN	0.173725	0.291055	8	A0A0H2UI11;P62893	Rpl39	60S ribosomal protein L39	A0A0H2UI11_RAT;RL39_RAT	1	NaN	NaN
PD7 / VD7	A0A0G2JVZ6;F1LZX9	A0A0G2JVZ6;F1LZX9	0.115939	0.115939	0.163223	0.284619	88	A0A0G2JVZ6;F1LZX9	Itgav	Integrin subunit alpha V	A0A0G2JVZ6_RAT;F1LZX9_RAT	22	8.368	1.08368
PD7 / VD7	F1M4I1	F1M4I1	-0.189558	0.189558	0.163479	0.284861	36	F1M4I1	NaN	Uncharacterized protein	F1M4I1_RAT	7	-12.3126	0.876874
PD7 / VD7	P62864;Q5BJN7	P62864;Q5BJN7	0.0204879	0.0204879	0.164129	0.285585	12	P62864;Q5BJN7	Fau;LOC100360647	40S ribosomal protein S30	RS30_RAT;Q5BJN7_RAT	2	1.43024	1.0143
PD7 / VD7	G3V8G5	G3V8G5	0.114116	0.114116	0.164057	0.285585	84	G3V8G5	Glg1	Golgi apparatus protein 1	G3V8G5_RAT	17	8.23116	1.08231
PD7 / VD7	P11466;Q6GMN6	P11466;Q6GMN6	-0.445148	0.445148	0.164324	0.285719	8	P11466;Q6GMN6	Crot	Peroxisomal carnitine O-octanoyltransferase;Carnitine O-octanoyltransferase	OCTC_RAT;Q6GMN6_RAT	2	-26.5491	0.734509
PD7 / VD7	Q6P686	Q6P686	-0.0395842	0.0395842	0.164981	0.286454	32	Q6P686	Ostf1	Osteoclast-stimulating factor 1	OSTF1_RAT	6	-2.70647	0.972935
PD7 / VD7	A0A0G2JZ83	A0A0G2JZ83	0.62042	0.62042	0.164873	0.286454	32	A0A0G2JZ83	Agap3	ArfGAP with GTPase domain, ankyrin repeat and PH domain 3	A0A0G2JZ83_RAT	7	53.7323	1.53732
PD7 / VD7	D3ZLA3	D3ZLA3	0.00413019	0.00413019	0.168699	0.286746	68	D3ZLA3	Cpne3	Copine 3	D3ZLA3_RAT	15	0.286693	1.00287
PD7 / VD7	P13471;Q6PDV6	P13471;Q6PDV6	0.0757958	0.0757958	0.166582	0.286746	40	P13471;Q6PDV6	Rps14;LOC100911847	40S ribosomal protein S14	RS14_RAT;Q6PDV6_RAT	5	5.39423	1.05394
PD7 / VD7	P35565	P35565	0.0828762	0.0828762	0.168529	0.286746	152	P35565	Canx	Calnexin	CALX_RAT	23	5.91275	1.05913
PD7 / VD7	D3ZBE5	D3ZBE5	0.056292	0.056292	0.168799	0.286746	24	D3ZBE5	Nek7	Serine/threonine-protein kinase Nek7	NEK7_RAT	5	3.97899	1.03979
PD7 / VD7	E9PTI6;Q5PQR0	E9PTI6;Q5PQR0	0.144253	0.144253	0.168311	0.286746	28	E9PTI6;Q5PQR0	Raly	RALY heterogeneous nuclear ribonucleoprotein	E9PTI6_RAT;Q5PQR0_RAT	6	10.5158	1.10516
PD7 / VD7	P12839	P12839	-0.0641111	0.0641111	0.168757	0.286746	288	P12839	Nefm	Neurofilament medium polypeptide	NFM_RAT	36	-4.34655	0.956535
PD7 / VD7	P97521	P97521	0.154579	0.154579	0.168711	0.286746	32	P97521	Slc25a20	Mitochondrial carnitine/acylcarnitine carrier protein	MCAT_RAT	8	11.3097	1.1131
PD7 / VD7	Q07984	Q07984	-0.290227	0.290227	0.167496	0.286746	24	Q07984	Ssr4	Translocon-associated protein subunit delta	SSRD_RAT	4	-18.2227	0.817773
PD7 / VD7	Q5PPG2;Q9R0J8	Q5PPG2;Q9R0J8	-0.089486	0.089486	0.166592	0.286746	32	Q5PPG2;Q9R0J8	Lgmn	Legumain	Q5PPG2_RAT;LGMN_RAT	7	-6.01424	0.939858
PD7 / VD7	B1WBY1	B1WBY1	0.0646957	0.0646957	0.167039	0.286746	36	B1WBY1	Cul1	Cul1 protein	B1WBY1_RAT	9	4.58643	1.04586
PD7 / VD7	D3Z8I7	D3Z8I7	-0.179335	0.179335	0.168639	0.286746	28	D3Z8I7	Gstt3	Glutathione S-transferase, theta 3	D3Z8I7_RAT	4	-11.689	0.88311
PD7 / VD7	A0A0G2K3L8	A0A0G2K3L8	-0.00845797	0.00845797	0.166674	0.286746	24	A0A0G2K3L8	Wdfy1	WD repeat and FYVE domain-containing 1	A0A0G2K3L8_RAT	5	-0.584547	0.994155
PD7 / VD7	Q5RK08	Q5RK08	0.0980891	0.0980891	0.167539	0.286746	40	Q5RK08	Nipsnap2	Glioblastoma amplified sequence	Q5RK08_RAT	8	7.03548	1.07035
PD7 / VD7	A0A0G2K4M6;P62738	A0A0G2K4M6;P62738	NaN	NaN	0.177178	0.292614	12	A0A0G2K4M6;P62738	Acta2	Actin, aortic smooth muscle;Actin, aortic smooth muscle	A0A0G2K4M6_RAT;ACTA_RAT	1	NaN	NaN
PD7 / VD7	A0A140TAF7;G3V9D0	A0A140TAF7;G3V9D0	-0.395025	0.395025	0.167049	0.286746	28	A0A140TAF7;G3V9D0	Poglut1	Protein O-glucosyltransferase 1	A0A140TAF7_RAT;PGLT1_RAT	7	-23.9524	0.760476
PD7 / VD7	M0R749	M0R749	-0.338099	0.338099	0.167916	0.286746	8	M0R749	Tspan15	Tetraspanin	M0R749_RAT	2	-20.8917	0.791083
PD7 / VD7	A0A0G2JZB6	A0A0G2JZB6	NaN	NaN	0.177845	0.293318	4	A0A0G2JZB6	NaN	Uncharacterized protein	A0A0G2JZB6_RAT	1	NaN	NaN
PD7 / VD7	P41498;Z4YNF4	P41498;Z4YNF4	0.215002	0.215002	0.168353	0.286746	32	P41498;Z4YNF4	Acp1	Low molecular weight phosphotyrosine protein phosphatase	PPAC_RAT;Z4YNF4_RAT	6	16.0705	1.16071
PD7 / VD7	P62762	P62762	-0.142981	0.142981	0.165564	0.286746	56	P62762	Vsnl1	Visinin-like protein 1	VISL1_RAT	12	-9.43541	0.905646
PD7 / VD7	B0BNJ4	B0BNJ4	-0.270346	0.270346	0.167685	0.286746	24	B0BNJ4	Ethe1	ETHE1, persulfide dioxygenase	B0BNJ4_RAT	5	-17.0879	0.829121
PD7 / VD7	D3ZKQ4	D3ZKQ4	-0.281968	0.281968	0.166253	0.286746	24	D3ZKQ4	Rabl6	RAB, member RAS oncogene family-like 6	D3ZKQ4_RAT	6	-17.7532	0.822468
PD7 / VD7	D3ZBS2;Q63416	D3ZBS2;Q63416	-0.138042	0.138042	0.166285	0.286746	52	D3ZBS2;Q63416	Itih3	Inter-alpha-trypsin inhibitor heavy chain H3	D3ZBS2_RAT;ITIH3_RAT	13	-9.12485	0.908751
PD7 / VD7	D3ZW38	D3ZW38	NaN	NaN	0.180604	0.296663	4	D3ZW38	Exosc6	Exosome component 6	D3ZW38_RAT	1	NaN	NaN
PD7 / VD7	G3V6V1;O09175	G3V6V1;O09175	0.0242205	0.0242205	0.16751	0.286746	28	G3V6V1;O09175	Rnpep	Aminopeptidase B	G3V6V1_RAT;AMPB_RAT	7	1.69301	1.01693
PD7 / VD7	G3V7V9;Q6P4Z6	G3V7V9;Q6P4Z6	-0.392404	0.392404	0.166437	0.286746	8	G3V7V9;Q6P4Z6	Lcmt1	Leucine carboxyl methyltransferase 1	G3V7V9_RAT;LCMT1_RAT	2	-23.8141	0.761859
PD7 / VD7	A1L1J9	A1L1J9	-0.27176	0.27176	0.166767	0.286746	16	A1L1J9	Lmf2	Lipase maturation factor 2	LMF2_RAT	4	-17.1692	0.828308
PD7 / VD7	P63025	P63025	-0.59908	0.59908	0.168738	0.286746	16	P63025	Vamp3	Vesicle-associated membrane protein 3	VAMP3_RAT	3	-33.9825	0.660175
PD7 / VD7	Q5I0P2	Q5I0P2	-0.319106	0.319106	0.168074	0.286746	16	Q5I0P2	Gcsh	Glycine cleavage system H protein, mitochondrial	GCSH_RAT	3	-19.8434	0.801566
PD7 / VD7	Q5U204	Q5U204	-0.479346	0.479346	0.16753	0.286746	8	Q5U204	Lamtor3	Ragulator complex protein LAMTOR3	LTOR3_RAT	2	-28.2697	0.717303
PD7 / VD7	Q4V8K2	Q4V8K2	-0.511909	0.511909	0.16765	0.286746	8	Q4V8K2	Ctnnbl1	Beta-catenin-like protein 1	CTBL1_RAT	2	-29.8706	0.701294
PD7 / VD7	D3ZXA6	D3ZXA6	-0.412628	0.412628	0.165282	0.286746	20	D3ZXA6	Pdpr	Pyruvate dehydrogenase phosphatase regulatory subunit	D3ZXA6_RAT	5	-24.8747	0.751253
PD7 / VD7	A0A0G2K023	A0A0G2K023	-0.31885	0.31885	0.169227	0.286873	12	A0A0G2K023	Lamc3	Laminin subunit gamma 3	A0A0G2K023_RAT	3	-19.8291	0.801709
PD7 / VD7	A0A0G2JVK3;G3V9X3;Q9QZH4	A0A0G2JVK3;G3V9X3;Q9QZH4	-0.384916	0.384916	0.169135	0.286873	8	A0A0G2JVK3;G3V9X3;Q9QZH4	Prkab2	5'-AMP-activated protein kinase subunit beta-2	A0A0G2JVK3_RAT;G3V9X3_RAT;AAKB2_RAT	2	-23.4177	0.765823
PD7 / VD7	P83953;Q56R20	P83953;Q56R20	-0.37722	0.37722	0.169143	0.286873	8	P83953;Q56R20	Kpna1	Importin subunit alpha-5;Importin subunit alpha	IMA5_RAT;Q56R20_RAT	2	-23.008	0.76992
PD7 / VD7	Q641W2	Q641W2	-0.310789	0.310789	0.169501	0.287139	20	Q641W2	Myg1	UPF0160 protein MYG1, mitochondrial	MYG1_RAT	5	-19.3799	0.806201
PD7 / VD7	A0A0G2K7X0;F7EL36;P49911	A0A0G2K7X0;F7EL36;P49911	-0.114665	0.114665	0.170039	0.28785	40	A0A0G2K7X0;F7EL36;P49911	Anp32a	Acidic leucine-rich nuclear phosphoprotein 32 family member A	A0A0G2K7X0_RAT;F7EL36_RAT;AN32A_RAT	7	-7.6403	0.923597
PD7 / VD7	B5DFJ1	B5DFJ1	NaN	NaN	0.183093	0.29774	4	B5DFJ1	Nkiras1	NFKB inhibitor interacting Ras-like protein 1 (Predicted), isoform CRA_a	B5DFJ1_RAT	1	NaN	NaN
PD7 / VD7	A0A1B0GWY8;D4ACF2	A0A1B0GWY8;D4ACF2	NaN	NaN	0.182995	0.29774	4	A0A1B0GWY8;D4ACF2	Trim21	Tripartite motif-containing 21 (Fragment);Tripartite motif protein 21 (Predicted), isoform CRA_a	A0A1B0GWY8_RAT;D4ACF2_RAT	1	NaN	NaN
PD7 / VD7	B2RYN9	B2RYN9	-0.891191	0.891191	0.170165	0.287862	8	B2RYN9	RGD1562230	RGD1562230 protein	B2RYN9_RAT	2	-46.0831	0.539169
PD7 / VD7	A0A0U1RRV7;Q0ZFS8	A0A0U1RRV7;Q0ZFS8	-0.34111	0.34111	0.170439	0.288126	8	A0A0U1RRV7;Q0ZFS8	Srsf3	RCG61099, isoform CRA_b;RCG61099, isoform CRA_c	A0A0U1RRV7_RAT;Q0ZFS8_RAT	2	-21.0566	0.789434
PD7 / VD7	A0A0G2JXN8	A0A0G2JXN8	-0.636089	0.636089	0.17061	0.288216	12	A0A0G2JXN8	Osbpl8	Oxysterol-binding protein	A0A0G2JXN8_RAT	3	-35.6545	0.643455
PD7 / VD7	F1LPG9;Q80X08	F1LPG9;Q80X08	-0.157162	0.157162	0.171642	0.289758	56	F1LPG9;Q80X08	Washc2c;Washc2	WASH complex subunit 2C;WASH complex subunit 2	F1LPG9_RAT;WASC2_RAT	14	-10.3213	0.896787
PD7 / VD7	F1LNH9;Q3SWT6	F1LNH9;Q3SWT6	NaN	NaN	0.184759	0.299648	4	F1LNH9;Q3SWT6	Ppef1	Serine/threonine-protein phosphatase;Serine/threonine-protein phosphatase with EF-hands 1	F1LNH9_RAT;PPE1_RAT	1	NaN	NaN
PD7 / VD7	B1H227	B1H227	0.111687	0.111687	0.172114	0.290152	24	B1H227	Rcc1	LOC682908 protein	B1H227_RAT	6	8.04908	1.08049
PD7 / VD7	F1M281;F1M9B5;Q64566	F1M281;F1M9B5;Q64566	-0.332176	0.332176	0.173281	0.290911	36	F1M281;F1M9B5;Q64566	Atp2c1	Calcium-transporting ATPase;Calcium-transporting ATPase;Calcium-transporting ATPase type 2C member 1	F1M281_RAT;F1M9B5_RAT;AT2C1_RAT	9	-20.5662	0.794338
PD7 / VD7	G3V6Y9;O55035	G3V6Y9;O55035	0.294613	0.294613	0.173027	0.290911	16	G3V6Y9;O55035	Ppig	Peptidyl-prolyl cis-trans isomerase G	G3V6Y9_RAT;PPIG_RAT	3	22.6556	1.22656
PD7 / VD7	B2RZB5	B2RZB5	0.298094	0.298094	0.173233	0.290911	12	B2RZB5	Chmp2a	Charged multivesicular body protein 2A	B2RZB5_RAT	3	22.9519	1.22952
PD7 / VD7	P07825	P07825	0.0474682	0.0474682	0.173145	0.290911	16	P07825	Syp	Synaptophysin	SYPH_RAT	3	3.34497	1.03345
PD7 / VD7	A0A0G2KAY8;Q923V8	A0A0G2KAY8;Q923V8	-0.257779	0.257779	0.172925	0.290911	12	A0A0G2KAY8;Q923V8	Selenof	Selenoprotein F	A0A0G2KAY8_RAT;SEP15_RAT	3	-16.3625	0.836375
PD7 / VD7	D3ZKX1	D3ZKX1	-0.248792	0.248792	0.172995	0.290911	12	D3ZKX1	Washc3	RCG48807, isoform CRA_a	D3ZKX1_RAT	3	-15.8399	0.841601
PD7 / VD7	A0A096MJY6	A0A096MJY6	-0.0781017	0.0781017	0.17371	0.291055	24	A0A096MJY6	Gbe1	Glucan (1,4-alpha-), branching enzyme 1 (Fragment)	A0A096MJY6_RAT	6	-5.26967	0.947303
PD7 / VD7	A0A096MK30;A0A1W2Q6E9	A0A096MK30;A0A1W2Q6E9	-0.0302818	0.0302818	0.173695	0.291055	182	A0A096MK30;A0A1W2Q6E9	Msn	Moesin	A0A096MK30_RAT;A0A1W2Q6E9_RAT	31	-2.0771	0.979229
PD7 / VD7	P07154	P07154	0.301776	0.301776	0.173953	0.291237	20	P07154	Ctsl	Cathepsin L1	CATL1_RAT	5	23.2661	1.23266
PD7 / VD7	D4A2P1	D4A2P1	-0.436303	0.436303	0.174406	0.291448	16	D4A2P1	Ccar1	Cell division cycle and apoptosis regulator 1	D4A2P1_RAT	4	-26.0974	0.739026
PD7 / VD7	Q5BK48	Q5BK48	-0.4363	0.4363	0.174438	0.291448	16	Q5BK48	Ttc5	Tetratricopeptide repeat protein 5	TTC5_RAT	4	-26.0973	0.739027
PD7 / VD7	Q32PZ3	Q32PZ3	-0.210675	0.210675	0.174334	0.291448	8	Q32PZ3	Unc45a	Protein unc-45 homolog A	UN45A_RAT	2	-13.5867	0.864133
PD7 / VD7	D3ZI42	D3ZI42	-0.134977	0.134977	0.174792	0.291839	28	D3ZI42	Lrsam1	Leucine-rich repeat and sterile alpha motif-containing 1	D3ZI42_RAT	7	-8.93158	0.910684
PD7 / VD7	G3V6H2	G3V6H2	0.00616943	0.00616943	0.175349	0.292314	92	G3V6H2	Prpf8	Pre-mRNA processing factor 8, isoform CRA_a	G3V6H2_RAT	22	0.428548	1.00429
PD7 / VD7	P62961;Q3ZAV2	P62961;Q3ZAV2	0.141001	0.141001	0.176003	0.292314	40	P62961;Q3ZAV2	Ybx1	Nuclease-sensitive element-binding protein 1	YBOX1_RAT;Q3ZAV2_RAT	7	10.267	1.10267
PD7 / VD7	F1LR92	F1LR92	-0.165471	0.165471	0.175666	0.292314	60	F1LR92	Serpina3m	Serine protease inhibitor A3M	F1LR92_RAT	11	-10.8363	0.891637
PD7 / VD7	B4F7E8	B4F7E8	0.0164073	0.0164073	0.175928	0.292314	76	B4F7E8	Fam129b	Niban-like protein 1	NIBL1_RAT	16	1.14376	1.01144
PD7 / VD7	D4ABS5	D4ABS5	-0.0450934	0.0450934	0.175987	0.292314	12	D4ABS5	Pithd1	PITH domain-containing 1	D4ABS5_RAT	3	-3.07729	0.969227
PD7 / VD7	Q6AYG5	Q6AYG5	-0.332083	0.332083	0.175566	0.292314	16	Q6AYG5	Echdc1	Ethylmalonyl-CoA decarboxylase	ECHD1_RAT	4	-20.5612	0.794388
PD7 / VD7	Q6B345	Q6B345	-1.05489	1.05489	0.176036	0.292314	8	Q6B345	S100a11	Protein S100-A11	S10AB_RAT	2	-51.8665	0.481335
PD7 / VD7	Q6P7Q1	Q6P7Q1	-0.477438	0.477438	0.175495	0.292314	12	Q6P7Q1	Babam2	BRISC and BRCA1-A complex member 2	BABA2_RAT	3	-28.1748	0.718252
PD7 / VD7	P24368	P24368	0.10919	0.10919	0.176505	0.292467	84	P24368	Ppib	Peptidyl-prolyl cis-trans isomerase B	PPIB_RAT	13	7.86228	1.07862
PD7 / VD7	Q9Z270	Q9Z270	-0.434681	0.434681	0.176684	0.292467	69	Q9Z270	Vapa	Vesicle-associated membrane protein-associated protein A	VAPA_RAT	9	-26.0143	0.739857
PD7 / VD7	A0A0G2K8Z9	A0A0G2K8Z9	0.128287	0.128287	0.176783	0.292467	164	A0A0G2K8Z9	Kif13b	Kinesin family member 13B	A0A0G2K8Z9_RAT	35	9.29955	1.093
PD7 / VD7	Q63396	Q63396	0.383632	0.383632	0.176849	0.292467	32	Q63396	Sub1	Activated RNA polymerase II transcriptional coactivator p15	TCP4_RAT	7	30.4622	1.30462
PD7 / VD7	Q6AYD9	Q6AYD9	NaN	NaN	0.18949	0.301395	4	Q6AYD9	Nudt19	Nucleoside diphosphate-linked moiety X motif 19	NUD19_RAT	1	NaN	NaN
PD7 / VD7	B1WBY6;G3V6M8	B1WBY6;G3V6M8	-0.301961	0.301961	0.176809	0.292467	8	B1WBY6;G3V6M8	Nup37	Nucleoporin 37	B1WBY6_RAT;G3V6M8_RAT	2	-18.8851	0.811149
PD7 / VD7	B2GV14	B2GV14	0.108352	0.108352	0.176831	0.292467	8	B2GV14	Txlna	Taxilin alpha	B2GV14_RAT	2	7.7996	1.078
PD7 / VD7	A0A0G2K1P1	A0A0G2K1P1	-0.179553	0.179553	0.177148	0.292614	40	A0A0G2K1P1	Mtmr7	Myotubularin-related protein 7	A0A0G2K1P1_RAT	10	-11.7024	0.882976
PD7 / VD7	D3ZBM3	D3ZBM3	0.0776028	0.0776028	0.177762	0.293318	24	D3ZBM3	Fech	Ferrochelatase	D3ZBM3_RAT	5	5.52631	1.05526
PD7 / VD7	A0A096MJA9;A0A096MKE0;A0A0G2K2B5	A0A096MJA9;A0A096MKE0;A0A0G2K2B5	0.0434401	0.0434401	0.178648	0.294442	48	A0A096MJA9;A0A096MKE0;A0A0G2K2B5	Asph	Aspartate-beta-hydroxylase	A0A096MJA9_RAT;A0A096MKE0_RAT;A0A0G2K2B5_RAT	12	3.05683	1.03057
PD7 / VD7	A2RRU1	A2RRU1	0.0774687	0.0774687	0.179105	0.294997	40	A2RRU1	Gys1	Glycogen [starch] synthase, muscle	GYS1_RAT	9	5.5165	1.05517
PD7 / VD7	Q6IRK9	Q6IRK9	0.0435737	0.0435737	0.179322	0.295154	60	Q6IRK9	Cpq	Carboxypeptidase Q	CBPQ_RAT	13	3.06638	1.03066
PD7 / VD7	P17988	P17988	-0.3868	0.3868	0.179458	0.29518	32	P17988	Sult1a1	Sulfotransferase 1A1	ST1A1_RAT	7	-23.5176	0.764824
PD7 / VD7	A0A0G2JUA8;A0A0G2KB37	A0A0G2JUA8;A0A0G2KB37	-0.730498	0.730498	0.180431	0.296579	12	A0A0G2JUA8;A0A0G2KB37	Tmem189	Transmembrane protein 189	A0A0G2JUA8_RAT;A0A0G2KB37_RAT	2	-39.7304	0.602696
PD7 / VD7	O55171;Q6IMX8	O55171;Q6IMX8	0.244249	0.244249	0.181188	0.297221	24	O55171;Q6IMX8	Acot2	Acyl-coenzyme A thioesterase 2, mitochondrial;Acyl-CoA thioesterase 2	ACOT2_RAT;Q6IMX8_RAT	5	18.4476	1.18448
PD7 / VD7	D3ZZ38	D3ZZ38	-0.0238707	0.0238707	0.181087	0.297221	12	D3ZZ38	Snx18	Sorting nexin	D3ZZ38_RAT	3	-1.64098	0.98359
PD7 / VD7	A0A0G2K3S4	A0A0G2K3S4	-0.00199724	0.00199724	0.181803	0.297365	74	A0A0G2K3S4	Abca9	ATP-binding cassette subfamily A member 9	A0A0G2K3S4_RAT	17	-0.138342	0.998617
PD7 / VD7	Q4QQS7	Q4QQS7	0.240527	0.240527	0.182252	0.297365	24	Q4QQS7	Umps	Uridine monophosphate synthetase	Q4QQS7_RAT	6	18.1424	1.18142
PD7 / VD7	Q5BJT4	Q5BJT4	NaN	NaN	0.193083	0.304688	4	Q5BJT4	Txndc15	Thioredoxin domain-containing protein 15	TXD15_RAT	1	NaN	NaN
PD7 / VD7	B0BMT9	B0BMT9	0.0924034	0.0924034	0.18214	0.297365	36	B0BMT9	Sqor	Sqrdl protein	B0BMT9_RAT	9	6.61448	1.06614
PD7 / VD7	D4ABI6;Q91Y78	D4ABI6;Q91Y78	0.496937	0.496937	0.182115	0.297365	36	D4ABI6;Q91Y78	Uchl3	Ubiquitin carboxyl-terminal hydrolase;Ubiquitin carboxyl-terminal hydrolase isozyme L3	D4ABI6_RAT;UCHL3_RAT	6	41.1214	1.41121
PD7 / VD7	O88637	O88637	-0.556041	0.556041	0.181792	0.297365	16	O88637	Pcyt2	Ethanolamine-phosphate cytidylyltransferase	PCY2_RAT	4	-31.9834	0.680166
PD7 / VD7	F1LMA7;Q4TU93	F1LMA7;Q4TU93	-0.27894	0.27894	0.182032	0.297365	20	F1LMA7;Q4TU93	Mrc2	C-type mannose receptor 2	F1LMA7_RAT;MRC2_RAT	5	-17.5803	0.824197
PD7 / VD7	A0A0G2JTA0	A0A0G2JTA0	-0.0890181	0.0890181	0.181423	0.297365	44	A0A0G2JTA0	Faf2	FAS-associated factor 2	A0A0G2JTA0_RAT	9	-5.98376	0.940162
PD7 / VD7	Q5M823	Q5M823	-0.38718	0.38718	0.181533	0.297365	8	Q5M823	Nudcd2	NudC domain-containing protein 2	NUDC2_RAT	2	-23.5377	0.764623
PD7 / VD7	Q5XIG8	Q5XIG8	0.120702	0.120702	0.182579	0.2975	80	Q5XIG8	Strap	Serine-threonine kinase receptor-associated protein	STRAP_RAT	13	8.7264	1.08726
PD7 / VD7	F1LM66	F1LM66	-0.158085	0.158085	0.182543	0.2975	76	F1LM66	Eftud2	Elongation factor Tu GTP-binding domain-containing 2	F1LM66_RAT	16	-10.3786	0.896214
PD7 / VD7	A0A0G2K508	A0A0G2K508	-0.230565	0.230565	0.182772	0.297615	8	A0A0G2K508	Rras2	RAS-related 2	A0A0G2K508_RAT	2	-14.7699	0.852301
PD7 / VD7	F1LRE2;P35859	F1LRE2;P35859	NaN	NaN	0.194768	0.305156	4	F1LRE2;P35859	Igfals	Insulin-like growth factor binding protein, acid labile subunit, isoform CRA_b;Insulin-like growth factor-binding protein complex acid labile subunit	F1LRE2_RAT;ALS_RAT	1	NaN	NaN
PD7 / VD7	A0A0G2JVQ1	A0A0G2JVQ1	NaN	NaN	0.194919	0.305156	4	A0A0G2JVQ1	Ckmt2	Creatine kinase S-type, mitochondrial	A0A0G2JVQ1_RAT	1	NaN	NaN
PD7 / VD7	Q71TY3	Q71TY3	0.163252	0.163252	0.183279	0.297844	36	Q71TY3	Rps27	40S ribosomal protein S27	RS27_RAT	5	11.9808	1.11981
PD7 / VD7	D4A3E1	D4A3E1	-0.127775	0.127775	0.183467	0.297951	44	D4A3E1	Hnrnpll	Heterogeneous nuclear ribonucleoprotein L-like	D4A3E1_RAT	9	-8.4758	0.915242
PD7 / VD7	A0A0G2K2P6;Q6AXM7	A0A0G2K2P6;Q6AXM7	0.00150562	0.00150562	0.184842	0.299648	56	A0A0G2K2P6;Q6AXM7	Hbs1l	HBS1-like protein	A0A0G2K2P6_RAT;HBS1L_RAT	14	0.104416	1.00104
PD7 / VD7	Q4KLH7	Q4KLH7	NaN	NaN	0.196259	0.306662	4	Q4KLH7	Rad21	RAD21 cohesin complex component	Q4KLH7_RAT	1	NaN	NaN
PD7 / VD7	Q63798	Q63798	-0.314747	0.314747	0.184881	0.299648	36	Q63798	Psme2	Proteasome activator complex subunit 2	PSME2_RAT	7	-19.6008	0.803992
PD7 / VD7	F1LNT0;Q62951	F1LNT0;Q62951	0.284637	0.284637	0.185965	0.300079	112	F1LNT0;Q62951	Dpysl4	Dihydropyrimidinase-related protein 4;Dihydropyrimidinase-related protein 4 (Fragment)	F1LNT0_RAT;DPYL4_RAT	23	21.8103	1.2181
PD7 / VD7	A0A140TAH5;P84092	A0A140TAH5;P84092	0.113215	0.113215	0.18621	0.300079	76	A0A140TAH5;P84092	Ap2m1	AP-2 complex subunit mu	A0A140TAH5_RAT;AP2M1_RAT	14	8.16359	1.08164
PD7 / VD7	Q5M7T5	Q5M7T5	0.17062	0.17062	0.186426	0.300079	120	Q5M7T5	Serpinc1	Serine (Or cysteine) peptidase inhibitor, clade C (Antithrombin), member 1	Q5M7T5_RAT	18	12.5542	1.12554
PD7 / VD7	A0A0G2KB56;P82808	A0A0G2KB56;P82808	-0.272625	0.272625	0.185557	0.300079	16	A0A0G2KB56;P82808	Gfpt1	Glutamine fructose-6-phosphate transaminase 1, isoform CRA_a;Glutamine--fructose-6-phosphate aminotransferase [isomerizing] 1	A0A0G2KB56_RAT;GFPT1_RAT	4	-17.2188	0.827812
PD7 / VD7	F1LMA9;Q7TP99	F1LMA9;Q7TP99	NaN	NaN	0.196861	0.306782	4	F1LMA9;Q7TP99	Znfx1	Zinc finger, NFX1-type-containing 1;Ab1-133	F1LMA9_RAT;Q7TP99_RAT	1	NaN	NaN
PD7 / VD7	F1LPP1;F1M0S5;F1M2D6;O55207	F1LPP1;F1M0S5;F1M2D6;O55207	NaN	NaN	0.197096	0.306782	4	F1LPP1;F1M0S5;F1M2D6;O55207	Synj2	Synaptojanin-2	F1LPP1_RAT;F1M0S5_RAT;F1M2D6_RAT;SYNJ2_RAT	1	NaN	NaN
PD7 / VD7	G3V7J2	G3V7J2	0.12424	0.12424	0.185945	0.300079	52	G3V7J2	Prkra	Interferon-inducible double-stranded RNA-dependent protein kinase activator A	G3V7J2_RAT	10	8.99331	1.08993
PD7 / VD7	P63322	P63322	0.136118	0.136118	0.185275	0.300079	48	P63322	Rala	Ras-related protein Ral-A	RALA_RAT	9	9.89444	1.09894
PD7 / VD7	Q498E0	Q498E0	-0.323853	0.323853	0.186247	0.300079	20	Q498E0	Txndc12	Thioredoxin domain-containing protein 12	TXD12_RAT	4	-20.1067	0.798933
PD7 / VD7	Q7TQ16	Q7TQ16	-0.284176	0.284176	0.186428	0.300079	12	Q7TQ16	Uqcrq	Cytochrome b-c1 complex subunit 8	QCR8_RAT	2	-17.879	0.82121
PD7 / VD7	B0BNB9	B0BNB9	-0.267581	0.267581	0.185639	0.300079	24	B0BNB9	Htra2	HtrA serine peptidase 2	B0BNB9_RAT	6	-16.9289	0.830711
PD7 / VD7	G3V7Z8	G3V7Z8	-0.616391	0.616391	0.186251	0.300079	12	G3V7Z8	Pabpn1	Poly(A) binding protein, nuclear 1, isoform CRA_a	G3V7Z8_RAT	3	-34.77	0.6523
PD7 / VD7	A0A1B0GWQ7;E9PT79;Q71SY3	A0A1B0GWQ7;E9PT79;Q71SY3	-0.139028	0.139028	0.186581	0.300079	28	A0A1B0GWQ7;E9PT79;Q71SY3	Tsn	Translin	A0A1B0GWQ7_RAT;E9PT79_RAT;Q71SY3_RAT	6	-9.18691	0.908131
PD7 / VD7	Q66H59	Q66H59	NaN	NaN	0.19809	0.307125	4	Q66H59	Npl	N-acetylneuraminate lyase	NPL_RAT	1	NaN	NaN
PD7 / VD7	A0A0G2K5M7;F1LPT8;F1LSM7;F1M994;Q63623	A0A0G2K5M7;F1LPT8;F1LSM7;F1M994;Q63623	NaN	NaN	0.198053	0.307125	4	A0A0G2K5M7;F1LPT8;F1LSM7;F1M994;Q63623	Scaf8;Scaf8;Scaf4;Scaf4;Scaf8	Protein SCAF8;Protein SCAF8;Splicing factor, arginine/serine-rich 15;Splicing factor, arginine/serine-rich 15;Protein SCAF8	A0A0G2K5M7_RAT;F1LPT8_RAT;F1LSM7_RAT;F1M994_RAT;SCAF8_RAT	1	NaN	NaN
PD7 / VD7	M0R5N4	M0R5N4	-0.330358	0.330358	0.186625	0.300079	8	M0R5N4	Pfdn4	Prefoldin subunit 4	M0R5N4_RAT	2	-20.4661	0.795339
PD7 / VD7	P62994	P62994	0.0949274	0.0949274	0.186849	0.300241	44	P62994	Grb2	Growth factor receptor-bound protein 2	GRB2_RAT	9	6.80117	1.06801
PD7 / VD7	B4F7A5	B4F7A5	NaN	NaN	0.199132	0.307477	8	B4F7A5	Cd99	CD99 molecule (Xg blood group)	B4F7A5_RAT	1	NaN	NaN
PD7 / VD7	G3V9M6	G3V9M6	0.0459115	0.0459115	0.187666	0.301133	256	G3V9M6	Fbn1	Fibrillin 1	G3V9M6_RAT	51	3.23352	1.03234
PD7 / VD7	A0A0G2K273;Q641X8	A0A0G2K273;Q641X8	0.00344604	0.00344604	0.187848	0.301133	64	A0A0G2K273;Q641X8	LOC100909481;Eif3e	Eukaryotic translation initiation factor 3 subunit E	A0A0G2K273_RAT;EIF3E_RAT	14	0.239147	1.00239
PD7 / VD7	P51673	P51673	0.460677	0.460677	0.187899	0.301133	8	P51673	Crabp2	Cellular retinoic acid-binding protein 2	RABP2_RAT	2	37.6187	1.37619
PD7 / VD7	D3ZNK1	D3ZNK1	-0.00848622	0.00848622	0.187642	0.301133	20	D3ZNK1	Mtx3	Metaxin 3	D3ZNK1_RAT	5	-0.586493	0.994135
PD7 / VD7	D3ZUY0	D3ZUY0	-0.905739	0.905739	0.188047	0.301172	8	D3ZUY0	Rdh14	Retinol dehydrogenase 14	D3ZUY0_RAT	2	-46.6241	0.533759
PD7 / VD7	B2DD29	B2DD29	0.454157	0.454157	0.189547	0.301395	12	B2DD29	Brsk1	Serine/threonine-protein kinase BRSK1	BRSK1_RAT	3	36.9982	1.36998
PD7 / VD7	F1M953;P48721	F1M953;P48721	0.15558	0.15558	0.189515	0.301395	152	F1M953;P48721	Hspa9	Stress-70 protein, mitochondrial;Stress-70 protein, mitochondrial	F1M953_RAT;GRP75_RAT	25	11.3869	1.11387
PD7 / VD7	A0A0G2JY45;D3ZHK8	A0A0G2JY45;D3ZHK8	-0.250296	0.250296	0.189396	0.301395	32	A0A0G2JY45;D3ZHK8	Cpeb2	Cytoplasmic polyadenylation element binding protein 2	A0A0G2JY45_RAT;D3ZHK8_RAT	7	-15.9276	0.840724
PD7 / VD7	F1M049	F1M049	0.289539	0.289539	0.188606	0.301395	62	F1M049	Atxn2	Ataxin 2	F1M049_RAT	12	22.2249	1.22225
PD7 / VD7	P83868	P83868	0.248512	0.248512	0.188718	0.301395	24	P83868	Ptges3	Prostaglandin E synthase 3	TEBP_RAT	5	18.7981	1.18798
PD7 / VD7	C0KUC5;C0KUC6	C0KUC5;C0KUC6	0.263016	0.263016	0.189141	0.301395	20	C0KUC5;C0KUC6	Lims1	LIM and senescent cell antigen-like-containing domain protein	C0KUC5_RAT;C0KUC6_RAT	3	19.9984	1.19998
PD7 / VD7	A0A140TAB3;P37285	A0A140TAB3;P37285	-0.176649	0.176649	0.189308	0.301395	72	A0A140TAB3;P37285	Klc1	Kinesin light chain 1	A0A140TAB3_RAT;KLC1_RAT	14	-11.5244	0.884756
PD7 / VD7	F1LM60	F1LM60	-0.259944	0.259944	0.188521	0.301395	24	F1LM60	Arap1	ArfGAP with RhoGAP domain, ankyrin repeat and PH domain 1	F1LM60_RAT	6	-16.488	0.83512
PD7 / VD7	F1M4W7	F1M4W7	0.561808	0.561808	0.189317	0.301395	12	F1M4W7	Cstf3	Cleavage stimulation factor subunit 3	F1M4W7_RAT	3	47.6118	1.47612
PD7 / VD7	Q6AYA7	Q6AYA7	NaN	NaN	0.203183	0.309567	4	Q6AYA7	Rfk	RCG48018	Q6AYA7_RAT	1	NaN	NaN
PD7 / VD7	Q6MG84	Q6MG84	-0.70663	0.70663	0.188481	0.301395	8	Q6MG84	Egfl8	Epidermal growth factor-like protein 8	EGFL8_RAT	2	-38.725	0.61275
PD7 / VD7	A0A0G2JVP5;D3ZZF8	A0A0G2JVP5;D3ZZF8	-0.238609	0.238609	0.189909	0.301661	20	A0A0G2JVP5;D3ZZF8	Paip1	Poly(A)-binding protein-interacting protein 1	A0A0G2JVP5_RAT;D3ZZF8_RAT	5	-15.2438	0.847562
PD7 / VD7	A0A0G2K781	A0A0G2K781	0.0385065	0.0385065	0.189963	0.301661	24	A0A0G2K781	Ppfibp1	PPFIA-binding protein 1	A0A0G2K781_RAT	6	2.70501	1.02705
PD7 / VD7	D4ADG2	D4ADG2	NaN	NaN	0.203008	0.309567	4	D4ADG2	Iba57	Iron-sulfur cluster assembly factor IBA57	D4ADG2_RAT	1	NaN	NaN
PD7 / VD7	A1L108	A1L108	-0.398694	0.398694	0.190435	0.302018	12	A1L108	Arpc5l	Actin-related protein 2/3 complex subunit 5-like protein	ARP5L_RAT	3	-24.1455	0.758545
PD7 / VD7	A0A0G2JYN4	A0A0G2JYN4	NaN	NaN	0.202843	0.309567	4	A0A0G2JYN4	Ergic2	ERGIC and golgi 2	A0A0G2JYN4_RAT	1	NaN	NaN
PD7 / VD7	F1M1J6	F1M1J6	NaN	NaN	0.203196	0.309567	4	F1M1J6	NaN	Uncharacterized protein	F1M1J6_RAT	1	NaN	NaN
PD7 / VD7	O35115	O35115	-0.0442936	0.0442936	0.190352	0.302018	12	O35115	Fhl2	Four and a half LIM domains protein 2	FHL2_RAT	3	-3.02355	0.969765
PD7 / VD7	Q6QI86	Q6QI86	-0.387386	0.387386	0.191267	0.302943	8	Q6QI86	Hdhd2	Haloacid dehalogenase-like hydrolase domain-containing protein 2	Q6QI86_RAT	2	-23.5487	0.764513
PD7 / VD7	Q9JID1	Q9JID1	-0.246981	0.246981	0.191212	0.302943	20	Q9JID1	Pdcd4	Programmed cell death protein 4	PDCD4_RAT	5	-15.7342	0.842658
PD7 / VD7	D4AC36	D4AC36	0.00217253	0.00217253	0.191511	0.303132	36	D4AC36	Eif3f	Eukaryotic translation initiation factor 3 subunit F	D4AC36_RAT	8	0.150702	1.00151
PD7 / VD7	Q6P6T4	Q6P6T4	0.188763	0.188763	0.191779	0.30336	44	Q6P6T4	Eml2	Echinoderm microtubule-associated protein-like 2	EMAL2_RAT	9	13.9786	1.13979
PD7 / VD7	M0RBY8	M0RBY8	1.60689	1.60689	0.192265	0.303931	8	M0RBY8	Brap	BRCA1-associated protein	M0RBY8_RAT	2	204.594	3.04594
PD7 / VD7	D3ZXL1	D3ZXL1	-0.090557	0.090557	0.192437	0.304005	12	D3ZXL1	Arih1	RBR-type E3 ubiquitin transferase	D3ZXL1_RAT	3	-6.08399	0.93916
PD7 / VD7	A0A0G2JYB9;F1M8D3	A0A0G2JYB9;F1M8D3	-0.176974	0.176974	0.193119	0.304688	8	A0A0G2JYB9;F1M8D3	Cmip	C-Maf-inducing protein	A0A0G2JYB9_RAT;F1M8D3_RAT	2	-11.5444	0.884556
PD7 / VD7	P24051	P24051	-0.146725	0.146725	0.194777	0.305156	20	P24051	Rps27l	40S ribosomal protein S27-like	RS27L_RAT	2	-9.67016	0.903298
PD7 / VD7	A0A0G2K3B2;F8WFN1;Q1H5H1	A0A0G2K3B2;F8WFN1;Q1H5H1	-0.271246	0.271246	0.194491	0.305156	12	A0A0G2K3B2;F8WFN1;Q1H5H1	Selenot	Selenoprotein T;Selenoprotein T;Thioredoxin reductase-like selenoprotein T	A0A0G2K3B2_RAT;F8WFN1_RAT;SELT_RAT	2	-17.1396	0.828604
PD7 / VD7	D3ZYI0	D3ZYI0	-0.0614753	0.0614753	0.194906	0.305156	8	D3ZYI0	Gca	Grancalcin	D3ZYI0_RAT	2	-4.17163	0.958284
PD7 / VD7	Q6PDU1	Q6PDU1	0.147231	0.147231	0.193816	0.305156	16	Q6PDU1	Srsf2	Serine/arginine-rich splicing factor 2	SRSF2_RAT	3	10.7442	1.10744
PD7 / VD7	D4A3U5	D4A3U5	-0.274126	0.274126	0.194509	0.305156	12	D4A3U5	Zfhx4	Zinc finger homeobox 4	D4A3U5_RAT	2	-17.3049	0.826951
PD7 / VD7	D4AAE4	D4AAE4	NaN	NaN	0.205927	0.310825	4	D4AAE4	Prss22	Protease, serine, 22 (Predicted)	D4AAE4_RAT	1	NaN	NaN
PD7 / VD7	P04905	P04905	0.174767	0.174767	0.194611	0.305156	80	P04905	Gstm1	Glutathione S-transferase Mu 1	GSTM1_RAT	13	12.8782	1.12878
PD7 / VD7	Q4KMA2	Q4KMA2	-0.273489	0.273489	0.194225	0.305156	36	Q4KMA2	Rad23b	UV excision repair protein RAD23 homolog B	RD23B_RAT	7	-17.2684	0.827316
PD7 / VD7	A0A0G2K4C6;F1M5N4	A0A0G2K4C6;F1M5N4	NaN	NaN	0.205568	0.310825	4	A0A0G2K4C6;F1M5N4	Me3	Malic enzyme	A0A0G2K4C6_RAT;F1M5N4_RAT	1	NaN	NaN
PD7 / VD7	F1LWS4	F1LWS4	NaN	NaN	0.206549	0.310973	4	F1LWS4	Cfhr2	Uncharacterized protein	F1LWS4_RAT	1	NaN	NaN
PD7 / VD7	A0A0G2JSR1;A0JPQ9;Q7TP14	A0A0G2JSR1;A0JPQ9;Q7TP14	-0.0968441	0.0968441	0.193705	0.305156	44	A0A0G2JSR1;A0JPQ9;Q7TP14	LOC100911881;Chid1;Chid1	Chitinase domain-containing protein 1-like;Chitinase domain-containing protein 1;Cc1-9	A0A0G2JSR1_RAT;CHID1_RAT;Q7TP14_RAT	10	-6.49238	0.935076
PD7 / VD7	Q32Q54	Q32Q54	-0.114005	0.114005	0.193797	0.305156	8	Q32Q54	Uqcc1	RCG37273, isoform CRA_a	Q32Q54_RAT	2	-7.59809	0.924019
PD7 / VD7	Q5FVH4	Q5FVH4	-0.307465	0.307465	0.194382	0.305156	8	Q5FVH4	Aktip	AKT-interacting protein	AKTIP_RAT	2	-19.194	0.80806
PD7 / VD7	A0A0H2UHB1;Q62904	A0A0H2UHB1;Q62904	NaN	NaN	0.207439	0.311542	4	A0A0H2UHB1;Q62904	Hsd17b7	3-keto-steroid reductase	A0A0H2UHB1_RAT;DHB7_RAT	1	NaN	NaN
PD7 / VD7	Q9R0C9	Q9R0C9	-0.183116	0.183116	0.195406	0.305722	12	Q9R0C9	Sigmar1	Sigma non-opioid intracellular receptor 1	SGMR1_RAT	2	-11.9201	0.880799
PD7 / VD7	A0A0G2JY18;Q498U6	A0A0G2JY18;Q498U6	NaN	NaN	0.20816	0.312107	8	A0A0G2JY18;Q498U6	Dffa	DNA fragmentation factor subunit alpha	A0A0G2JY18_RAT;Q498U6_RAT	1	NaN	NaN
PD7 / VD7	A0A0G2K586;P70623;Q5XFV4	A0A0G2K586;P70623;Q5XFV4	NaN	NaN	0.208207	0.312107	4	A0A0G2K586;P70623;Q5XFV4	Fabp4	Fatty acid-binding protein, adipocyte;Fatty acid-binding protein, adipocyte;Fabp4 protein	A0A0G2K586_RAT;FABP4_RAT;Q5XFV4_RAT	1	NaN	NaN
PD7 / VD7	A0A0G2K7Y5;P97531	A0A0G2K7Y5;P97531	NaN	NaN	0.208328	0.312107	4	A0A0G2K7Y5;P97531	Trip10	Cdc42-interacting protein 4	A0A0G2K7Y5_RAT;CIP4_RAT	1	NaN	NaN
PD7 / VD7	P08033	P08033	-0.288182	0.288182	0.195747	0.306059	8	P08033	Gjb1	Gap junction beta-1 protein	CXB1_RAT	2	-18.1067	0.818933
PD7 / VD7	A0A0G2K7W4	A0A0G2K7W4	-0.226584	0.226584	0.196388	0.306668	40	A0A0G2K7W4	Map4k4	Mitogen-activated protein kinase kinase kinase kinase 4	A0A0G2K7W4_RAT	10	-14.5344	0.854656
PD7 / VD7	M0RCF3	M0RCF3	0.285572	0.285572	0.196657	0.306694	56	M0RCF3	Itgb3	Integrin beta	M0RCF3_RAT	12	21.8894	1.21889
PD7 / VD7	F1LYS7	F1LYS7	0.0785218	0.0785218	0.196544	0.306694	20	F1LYS7	Sgcd	Sarcoglycan, delta	F1LYS7_RAT	5	5.59355	1.05594
PD7 / VD7	G3V6L8;P70483	G3V6L8;P70483	-0.0500352	0.0500352	0.197217	0.306782	44	G3V6L8;P70483	Strn	RCG61894, isoform CRA_a;Striatin	G3V6L8_RAT;STRN_RAT	10	-3.40872	0.965913
PD7 / VD7	D3ZS58	D3ZS58	NaN	NaN	0.209553	0.312789	4	D3ZS58	Ndufa2	NADH dehydrogenase [ubiquinone] 1 alpha subcomplex subunit 2	D3ZS58_RAT	1	NaN	NaN
PD7 / VD7	D4A997	D4A997	NaN	NaN	0.209703	0.31282	4	D4A997	Htatsf1	HIV TAT specific factor 1 (Predicted)	D4A997_RAT	1	NaN	NaN
PD7 / VD7	M0R8C1	M0R8C1	0.118399	0.118399	0.197171	0.306782	24	M0R8C1	Reep2	Receptor expression-enhancing protein	M0R8C1_RAT	5	8.55296	1.08553
PD7 / VD7	E9PT85;Q6AZ64	E9PT85;Q6AZ64	-0.206171	0.206171	0.197461	0.306966	12	E9PT85;Q6AZ64	Xrcc6	X-ray repair cross-complementing 6;X-ray repair complementing defective repair in Chinese hamster cells 6, isoform CRA_a	E9PT85_RAT;Q6AZ64_RAT	3	-13.3165	0.866835
PD7 / VD7	B0K026;G3V996	B0K026;G3V996	-0.0383999	0.0383999	0.197897	0.307125	8	B0K026;G3V996	Letmd1	LETM1 domain-containing 1	B0K026_RAT;G3V996_RAT	2	-2.62657	0.973734
PD7 / VD7	Q5U2U4	Q5U2U4	-0.0991815	0.0991815	0.198335	0.307125	16	Q5U2U4	Scamp2	Secretory carrier-associated membrane protein	Q5U2U4_RAT	2	-6.64375	0.933562
PD7 / VD7	D4A6C5	D4A6C5	0.11825	0.11825	0.198569	0.307125	24	D4A6C5	Arhgap1	Rho GTPase-activating protein 1	D4A6C5_RAT	6	8.54172	1.08542
PD7 / VD7	P70580	P70580	-0.116384	0.116384	0.198629	0.307125	20	P70580	Pgrmc1	Membrane-associated progesterone receptor component 1	PGRC1_RAT	5	-7.75028	0.922497
PD7 / VD7	Q5FVM7	Q5FVM7	0.623178	0.623178	0.198698	0.307125	8	Q5FVM7	Dnajc16	DnaJ homolog subfamily C member 16	DJC16_RAT	2	54.0265	1.54026
PD7 / VD7	E9PT90	E9PT90	-0.00727158	0.00727158	0.198341	0.307125	16	E9PT90	Spart	Spartin	E9PT90_RAT	3	-0.50276	0.994972
PD7 / VD7	Q04753;Q6P9X1	Q04753;Q6P9X1	-0.541622	0.541622	0.197746	0.307125	12	Q04753;Q6P9X1	Clns1a	Methylosome subunit pICln;Chloride channel, nucleotide-sensitive, 1A	ICLN_RAT;Q6P9X1_RAT	3	-31.3002	0.686998
PD7 / VD7	P23457	P23457	NaN	NaN	0.211055	0.312922	4	P23457	Akr1c9	3-alpha-hydroxysteroid dehydrogenase	DIDH_RAT	1	NaN	NaN
PD7 / VD7	B5DEH2	B5DEH2	-0.110588	0.110588	0.199178	0.307477	44	B5DEH2	Erlin2	Erlin-2	ERLN2_RAT	10	-7.37898	0.92621
PD7 / VD7	Q68FX3	Q68FX3	0.121749	0.121749	0.199343	0.307537	32	Q68FX3	Ddx19a	DEAD (Asp-Glu-Ala-Asp) box polypeptide 19a	Q68FX3_RAT	7	8.80531	1.08805
PD7 / VD7	P11517	P11517	-0.0466681	0.0466681	0.200184	0.307664	24	P11517	NaN	Hemoglobin subunit beta-2	HBB2_RAT	3	-3.18303	0.96817
PD7 / VD7	D3ZAW4	D3ZAW4	-0.0818827	0.0818827	0.200051	0.307664	44	D3ZAW4	Abhd4	Abhydrolase domain containing 4 (Predicted)	D3ZAW4_RAT	9	-5.51761	0.944824
PD7 / VD7	P14562	P14562	0.490361	0.490361	0.199913	0.307664	16	P14562	Lamp1	Lysosome-associated membrane glycoprotein 1	LAMP1_RAT	4	40.4796	1.4048
PD7 / VD7	Q5U318	Q5U318	-1.05003	1.05003	0.200182	0.307664	20	Q5U318	Pea15	Astrocytic phosphoprotein PEA-15	PEA15_RAT	3	-51.7041	0.482959
PD7 / VD7	Q5XI26	Q5XI26	0.357114	0.357114	0.199867	0.307664	32	Q5XI26	Stat2	Signal transducer and activator of transcription	Q5XI26_RAT	7	28.0861	1.28086
PD7 / VD7	O88377	O88377	-0.319882	0.319882	0.199851	0.307664	12	O88377	Pip4k2b	Phosphatidylinositol 5-phosphate 4-kinase type-2 beta	PI42B_RAT	3	-19.8864	0.801136
PD7 / VD7	P13941	P13941	0.482297	0.482297	0.200489	0.307939	8	P13941	Col3a1	Collagen alpha-1(III) chain	CO3A1_RAT	2	39.6966	1.39697
PD7 / VD7	A0A0G2JWA3	A0A0G2JWA3	-0.278998	0.278998	0.200697	0.308017	12	A0A0G2JWA3	Xpo7	Exportin 7	A0A0G2JWA3_RAT	3	-17.5837	0.824163
PD7 / VD7	B5DFK8;G3V6B0	B5DFK8;G3V6B0	0.00962384	0.00962384	0.200793	0.308017	56	B5DFK8;G3V6B0	Pdxdc1	Pdxdc1 protein;Pyridoxal-dependent decarboxylase domain-containing 1	B5DFK8_RAT;G3V6B0_RAT	13	0.669303	1.00669
PD7 / VD7	Q5FVI6	Q5FVI6	0.109572	0.109572	0.200969	0.308094	60	Q5FVI6	Atp6v1c1	V-type proton ATPase subunit C 1	VATC1_RAT	12	7.8908	1.07891
PD7 / VD7	D3ZA38	D3ZA38	0.949693	0.949693	0.20166	0.308959	44	D3ZA38	Mybpc2	Myosin binding protein C, fast-type (Predicted)	D3ZA38_RAT	11	93.1461	1.93146
PD7 / VD7	A0A0G2K0T6	A0A0G2K0T6	0.111917	0.111917	0.202176	0.309554	68	A0A0G2K0T6	Sncg	Gamma-synuclein	A0A0G2K0T6_RAT	10	8.06633	1.08066
PD7 / VD7	Q505J9	Q505J9	0.148364	0.148364	0.202673	0.309567	44	Q505J9	Atad1	ATPase family AAA domain-containing protein 1	ATAD1_RAT	9	10.8312	1.10831
PD7 / VD7	M0R7U1	M0R7U1	-0.0746203	0.0746203	0.202532	0.309567	24	M0R7U1	Ak5	Adenylate kinase 5	M0R7U1_RAT	5	-5.0408	0.949592
PD7 / VD7	M0R7D1;M0RC12;Q5XI01	M0R7D1;M0RC12;Q5XI01	0.306258	0.306258	0.203241	0.309567	12	M0R7D1;M0RC12;Q5XI01	Larp7	La-related protein 7	M0R7D1_RAT;M0RC12_RAT;LARP7_RAT	3	23.6496	1.2365
PD7 / VD7	Q1KQ07	Q1KQ07	-0.754603	0.754603	0.202647	0.309567	8	Q1KQ07	Stat6	Signal transducer and activator of transcription	Q1KQ07_RAT	2	-40.7291	0.592709
PD7 / VD7	A0A0G2K135;Q9WUW3	A0A0G2K135;Q9WUW3	-0.137467	0.137467	0.203328	0.309567	28	A0A0G2K135;Q9WUW3	Cfi	Complement factor I	A0A0G2K135_RAT;CFAI_RAT	5	-9.08859	0.909114
PD7 / VD7	Q6AY23	Q6AY23	0.328036	0.328036	0.203601	0.309789	12	Q6AY23	Pycr2	Pyrroline-5-carboxylate reductase 2	P5CR2_RAT	3	25.5303	1.2553
PD7 / VD7	Q6AYR1	Q6AYR1	-0.118178	0.118178	0.203812	0.309916	44	Q6AYR1	Tfg	RCG52996, isoform CRA_a	Q6AYR1_RAT	10	-7.86495	0.92135
PD7 / VD7	A0A140TA95;G3V9F3	A0A140TA95;G3V9F3	-0.0209693	0.0209693	0.203959	0.309946	52	A0A140TA95;G3V9F3	Mprip	Myosin phosphatase Rho-interacting protein	A0A140TA95_RAT;G3V9F3_RAT	13	-1.44297	0.98557
PD7 / VD7	Q4KLI0	Q4KLI0	NaN	NaN	0.214719	0.314554	4	Q4KLI0	Smarcb1	SWI/SNF-related matrix-associated actin-dependent regulator of chromatin subfamily B member 1	Q4KLI0_RAT	1	NaN	NaN
PD7 / VD7	Q63965	Q63965	0.179626	0.179626	0.205095	0.310704	36	Q63965	Sfxn1	Sideroflexin-1	SFXN1_RAT	7	13.259	1.13259
PD7 / VD7	G3V811	G3V811	1.35492	1.35492	0.204846	0.310704	8	G3V811	F13a1	Coagulation factor XIII A chain	G3V811_RAT	2	155.784	2.55784
PD7 / VD7	B2RZ77	B2RZ77	-0.0392141	0.0392141	0.204903	0.310704	32	B2RZ77	Dpt	Dermatopontin	B2RZ77_RAT	7	-2.68151	0.973185
PD7 / VD7	Q6MG61	Q6MG61	-0.00285962	0.00285962	0.205008	0.310704	40	Q6MG61	Clic1	Chloride intracellular channel protein 1	CLIC1_RAT	9	-0.198017	0.99802
PD7 / VD7	D3ZH59;D4AAL4;Q9Z173	D3ZH59;D4AAL4;Q9Z173	0.0136356	0.0136356	0.204653	0.310704	8	D3ZH59;D4AAL4;Q9Z173	Adgrl3	Adhesion G protein-coupled receptor L3	D3ZH59_RAT;D4AAL4_RAT;AGRL3_RAT	2	0.949629	1.0095
PD7 / VD7	P07943	P07943	0.0361499	0.0361499	0.205399	0.310825	124	P07943	Akr1b1	Aldo-keto reductase family 1 member B1	ALDR_RAT	16	2.53738	1.02537
PD7 / VD7	D3ZXJ5	D3ZXJ5	NaN	NaN	0.216582	0.315358	4	D3ZXJ5	Efl1	Elongation factor-like GTPase 1	D3ZXJ5_RAT	1	NaN	NaN
PD7 / VD7	D3ZZN4;D4A771;P04646	D3ZZN4;D4A771;P04646	0.382293	0.382293	0.205946	0.310825	32	D3ZZN4;D4A771;P04646	;;Rpl35a	Uncharacterized protein;Uncharacterized protein;60S ribosomal protein L35a	D3ZZN4_RAT;D4A771_RAT;RL35A_RAT	5	30.3412	1.30341
PD7 / VD7	Q3MIE4	Q3MIE4	0.106416	0.106416	0.206227	0.310825	132	Q3MIE4	Vat1	Synaptic vesicle membrane protein VAT-1 homolog	VAT1_RAT	20	7.65505	1.07655
PD7 / VD7	P41565;Q5XIJ3	P41565;Q5XIJ3	0.185436	0.185436	0.205574	0.310825	60	P41565;Q5XIJ3	Idh3g	Isocitrate dehydrogenase [NAD] subunit gamma 1, mitochondrial;Isocitrate dehydrogenase [NAD] subunit, mitochondrial	IDHG1_RAT;Q5XIJ3_RAT	10	13.7161	1.13716
PD7 / VD7	Q3KR55	Q3KR55	-0.142925	0.142925	0.206253	0.310825	16	Q3KR55	U2af1	RCG60540, isoform CRA_a	Q3KR55_RAT	4	-9.43188	0.905681
PD7 / VD7	O70188	O70188	0.248253	0.248253	0.206323	0.310825	8	O70188	Nfic	Nuclear factor 1	O70188_RAT	2	18.7768	1.18777
PD7 / VD7	Q5I0K3	Q5I0K3	0.871421	0.871421	0.206227	0.310825	20	Q5I0K3	Clybl	Citramalyl-CoA lyase, mitochondrial	CLYBL_RAT	4	82.9464	1.82946
PD7 / VD7	P08010	P08010	-0.0116326	0.0116326	0.206689	0.310981	100	P08010	Gstm2	Glutathione S-transferase Mu 2	GSTM2_RAT	14	-0.803069	0.991969
PD7 / VD7	P35427;Q5RK10	P35427;Q5RK10	0.061175	0.061175	0.20681	0.310981	36	P35427;Q5RK10	Rpl13a	60S ribosomal protein L13a	RL13A_RAT;Q5RK10_RAT	6	4.33152	1.04332
PD7 / VD7	Q63159	Q63159	-0.215593	0.215593	0.207195	0.311368	12	Q63159	Coq3	Ubiquinone biosynthesis O-methyltransferase, mitochondrial	COQ3_RAT	3	-13.8808	0.861192
PD7 / VD7	P50123	P50123	-0.27806	0.27806	0.207805	0.311899	12	P50123	Enpep	Glutamyl aminopeptidase	AMPE_RAT	3	-17.5301	0.824699
PD7 / VD7	F1LPG3;O88588	F1LPG3;O88588	0.246733	0.246733	0.208475	0.312136	12	F1LPG3;O88588	Pacs1	Phosphofurin acidic cluster sorting protein 1	F1LPG3_RAT;PACS1_RAT	3	18.6517	1.18652
PD7 / VD7	Q6P9U8	Q6P9U8	-0.0625466	0.0625466	0.208849	0.312504	44	Q6P9U8	Eif3h	Eukaryotic translation initiation factor 3 subunit H	EIF3H_RAT	8	-4.24276	0.957572
PD7 / VD7	Q2YDU8	Q2YDU8	NaN	NaN	0.219387	0.317427	4	Q2YDU8	Spns1	Protein spinster homolog 1	SPNS1_RAT	1	NaN	NaN
PD7 / VD7	A0A0A0MXW9;A0A0G2K8K9;D4AE41;P84586	A0A0A0MXW9;A0A0G2K8K9;D4AE41;P84586	-0.0169647	0.0169647	0.209262	0.312737	20	A0A0A0MXW9;A0A0G2K8K9;D4AE41;P84586	Rbmxl1;Rbmxl1b;Rbmxl1;Rbmxrtl	RNA-binding motif protein, X-linked-like-1;RNA binding motif protein, X-linked-like 1B;RNA binding motif protein, X-linked-like-1;RNA-binding motif protein, X chromosome retrogene-like	A0A0A0MXW9_RAT;A0A0G2K8K9_RAT;RMXL1_RAT;RMXRL_RAT	5	-1.16902	0.98831
PD7 / VD7	B2RYS9	B2RYS9	-0.360178	0.360178	0.20922	0.312737	8	B2RYS9	Trmt112	Similar to RIKEN cDNA 0610038D11 (Predicted), isoform CRA_b	B2RYS9_RAT	2	-22.0932	0.779068
PD7 / VD7	P07323	P07323	0.136139	0.136139	0.209487	0.312789	90	P07323	Eno2	Gamma-enolase	ENOG_RAT	14	9.89599	1.09896
PD7 / VD7	Q64232	Q64232	0.211358	0.211358	0.210615	0.312887	24	Q64232	Tecr	Very-long-chain enoyl-CoA reductase	TECR_RAT	5	15.7777	1.15778
PD7 / VD7	Q6AXV4	Q6AXV4	0.044737	0.044737	0.2105	0.312887	72	Q6AXV4	Samm50	Sorting and assembly machinery component 50 homolog	SAM50_RAT	14	3.14951	1.0315
PD7 / VD7	B0BNJ1	B0BNJ1	-0.119591	0.119591	0.210851	0.312887	40	B0BNJ1	Sri	LOC683667 protein	B0BNJ1_RAT	8	-7.95513	0.920449
PD7 / VD7	D4A6X3	D4A6X3	-0.078689	0.078689	0.210237	0.312887	52	D4A6X3	Kank4	KN motif and ankyrin repeat domains 4	D4A6X3_RAT	12	-5.30822	0.946918
PD7 / VD7	A0A0G2JUT7	A0A0G2JUT7	NaN	NaN	0.22231	0.319685	4	A0A0G2JUT7	B3glct	Beta 3-glucosyltransferase	A0A0G2JUT7_RAT	1	NaN	NaN
PD7 / VD7	D3ZIN7	D3ZIN7	-0.17794	0.17794	0.210777	0.312887	12	D3ZIN7	Mrps23	Mitochondrial ribosomal protein S23	D3ZIN7_RAT	3	-11.6036	0.883964
PD7 / VD7	Q6P6S4	Q6P6S4	-0.428666	0.428666	0.210541	0.312887	12	Q6P6S4	Sil1	Nucleotide exchange factor SIL1	SIL1_RAT	3	-25.7052	0.742948
PD7 / VD7	D3ZA85	D3ZA85	-0.473867	0.473867	0.210853	0.312887	8	D3ZA85	Nfu1	Histone cell cycle regulation defective interacting protein 5 (Predicted), isoform CRA_a	D3ZA85_RAT	2	-27.9968	0.720032
PD7 / VD7	Q5I0D5	Q5I0D5	-0.381286	0.381286	0.210767	0.312887	12	Q5I0D5	Lhpp	Phospholysine phosphohistidine inorganic pyrophosphate phosphatase	LHPP_RAT	3	-23.2247	0.767753
PD7 / VD7	P06238	P06238	-0.269623	0.269623	0.210903	0.312887	8	P06238	A2m	Alpha-2-macroglobulin	A2MG_RAT	2	-17.0464	0.829536
PD7 / VD7	Q68FW4	Q68FW4	-0.190141	0.190141	0.211215	0.312968	8	Q68FW4	Stx18	Syntaxin-18	STX18_RAT	2	-12.348	0.87652
PD7 / VD7	A0A0G2K542;Q4V8I9	A0A0G2K542;Q4V8I9	0.111711	0.111711	0.211458	0.313137	84	A0A0G2K542;Q4V8I9	Ugp2	UTP--glucose-1-phosphate uridylyltransferase	A0A0G2K542_RAT;Q4V8I9_RAT	16	8.05091	1.08051
PD7 / VD7	Q5U214	Q5U214	-0.328836	0.328836	0.211961	0.313325	16	Q5U214	Snrpa	Small nuclear ribonucleoprotein polypeptide A	Q5U214_RAT	3	-20.3821	0.796179
PD7 / VD7	Q4QQT3	Q4QQT3	0.367523	0.367523	0.211773	0.313325	12	Q4QQT3	Celf1	CUGBP Elav-like family member 1	CELF1_RAT	2	29.0135	1.29014
PD7 / VD7	D3ZZW8	D3ZZW8	-0.33787	0.33787	0.212099	0.313325	8	D3ZZW8	Lvrn	Aminopeptidase	D3ZZW8_RAT	2	-20.8791	0.791209
PD7 / VD7	F1LU19;F1LVI3;F1LYR6;F1M2F1	F1LU19;F1LVI3;F1LYR6;F1M2F1	0.127408	0.127408	0.212041	0.313325	12	F1LU19;F1LVI3;F1LYR6;F1M2F1	Rbms3	RNA-binding motif, single stranded-interacting protein 3;RNA-binding motif, single stranded-interacting protein 3;RNA-binding motif, single stranded-interacting protein 3;RNA-binding motif, single stranded-interacting protein 3	F1LU19_RAT;F1LVI3_RAT;F1LYR6_RAT;F1M2F1_RAT	3	9.23292	1.09233
PD7 / VD7	D4A412;P62912	D4A412;P62912	0.226221	0.226221	0.212281	0.313335	40	D4A412;P62912	;Rpl32	Uncharacterized protein;60S ribosomal protein L32	D4A412_RAT;RL32_RAT	6	16.9767	1.16977
PD7 / VD7	Q5M963	Q5M963	0.0602045	0.0602045	0.212555	0.313335	64	Q5M963	Cmas	Cytidine monophosphate N-acetylneuraminic acid synthetase	Q5M963_RAT	15	4.26135	1.04261
PD7 / VD7	A0A0G2JX45;D4A2N1	A0A0G2JX45;D4A2N1	NaN	NaN	0.225683	0.321895	4	A0A0G2JX45;D4A2N1	Ate1	Arginyl-tRNA--protein transferase 1	A0A0G2JX45_RAT;D4A2N1_RAT	1	NaN	NaN
PD7 / VD7	F1LQI1	F1LQI1	0.0863924	0.0863924	0.212696	0.313335	44	F1LQI1	Hagh	Hydroxyacyl glutathione hydrolase	F1LQI1_RAT	7	6.1712	1.06171
PD7 / VD7	A0A0G2K7W7;P18265	A0A0G2K7W7;P18265	0.199023	0.199023	0.212749	0.313335	16	A0A0G2K7W7;P18265	Gsk3a	Glycogen synthase kinase-3 alpha	A0A0G2K7W7_RAT;GSK3A_RAT	3	14.7921	1.14792
PD7 / VD7	A0A0G2JSH6;Q9WUD2	A0A0G2JSH6;Q9WUD2	0.06292	0.06292	0.212654	0.313335	16	A0A0G2JSH6;Q9WUD2	Trpv2	Transient receptor potential cation channel subfamily V member 2	A0A0G2JSH6_RAT;TRPV2_RAT	4	4.45779	1.04458
PD7 / VD7	Q765A7	Q765A7	NaN	NaN	0.22734	0.323481	4	Q765A7	Pgap1	GPI inositol-deacylase	PGAP1_RAT	1	NaN	NaN
PD7 / VD7	D3ZIU2	D3ZIU2	NaN	NaN	0.227594	0.323654	4	D3ZIU2	Psmg3	Proteasome assembly chaperone 3	D3ZIU2_RAT	1	NaN	NaN
PD7 / VD7	E9PTV0	E9PTV0	-0.155236	0.155236	0.212968	0.313468	12	E9PTV0	Guk1	Guanylate kinase 1	E9PTV0_RAT	3	-10.2015	0.897985
PD7 / VD7	D4A5K6	D4A5K6	0.580446	0.580446	0.213188	0.313602	20	D4A5K6	Zmpste24	CAAX prenyl protease	D4A5K6_RAT	5	49.5312	1.49531
PD7 / VD7	Q5QJC9	Q5QJC9	-0.117247	0.117247	0.213551	0.313946	32	Q5QJC9	Bag5	BAG family molecular chaperone regulator 5	BAG5_RAT	8	-7.80547	0.921945
PD7 / VD7	D3ZJB1	D3ZJB1	NaN	NaN	0.229437	0.325325	8	D3ZJB1	Mfap5	Microfibril-associated protein 5	D3ZJB1_RAT	1	NaN	NaN
PD7 / VD7	R9PXU3	R9PXU3	NaN	NaN	0.229415	0.325325	4	R9PXU3	Pacsin2	Protein kinase C and casein kinase substrate in neurons 2 protein	R9PXU3_RAT	1	NaN	NaN
PD7 / VD7	D4A9L2	D4A9L2	0.185893	0.185893	0.214064	0.314421	40	D4A9L2	Srsf1	RCG34610, isoform CRA_c	D4A9L2_RAT	9	13.7521	1.13752
PD7 / VD7	B2GV87	B2GV87	-0.329291	0.329291	0.214132	0.314421	16	B2GV87	Ptpre	Receptor-type tyrosine-protein phosphatase epsilon	PTPRE_RAT	4	-20.4073	0.795927
PD7 / VD7	P06687	P06687	0.250693	0.250693	0.214941	0.314554	220	P06687	Atp1a3	Sodium/potassium-transporting ATPase subunit alpha-3	AT1A3_RAT	33	18.9779	1.18978
PD7 / VD7	P63041	P63041	NaN	NaN	0.230565	0.326319	4	P63041	Cplx1	Complexin-1	CPLX1_RAT	1	NaN	NaN
PD7 / VD7	Q4KLL7	Q4KLL7	-0.145059	0.145059	0.215034	0.314554	24	Q4KLL7	Vps4b	Vacuolar protein sorting 4 homolog B	Q4KLL7_RAT	6	-9.56577	0.904342
PD7 / VD7	A0JN25	A0JN25	NaN	NaN	0.231275	0.326946	8	A0JN25	Mapt	Microtubule-associated protein	A0JN25_RAT	1	NaN	NaN
PD7 / VD7	O35263	O35263	NaN	NaN	0.23145	0.326946	4	O35263	Pafah1b3	Platelet-activating factor acetylhydrolase IB subunit gamma	PA1B3_RAT	1	NaN	NaN
PD7 / VD7	P68403	P68403	-0.244328	0.244328	0.214526	0.314554	12	P68403	Prkcb	Protein kinase C beta type	KPCB_RAT	3	-15.5791	0.844209
PD7 / VD7	Q5M7T9	Q5M7T9	0.322986	0.322986	0.215126	0.314554	12	Q5M7T9	Thnsl2	Threonine synthase-like 2	THNS2_RAT	3	25.0917	1.25092
PD7 / VD7	D3ZN27	D3ZN27	-0.218459	0.218459	0.214438	0.314554	40	D3ZN27	Dnajc13	DnaJ heat shock protein family (Hsp40) member C13	D3ZN27_RAT	10	-14.0517	0.859483
PD7 / VD7	Q62975	Q62975	-0.252895	0.252895	0.215012	0.314554	8	Q62975	Serpina10	Protein Z-dependent protease inhibitor	ZPI_RAT	2	-16.0789	0.839211
PD7 / VD7	Q6P9U0	Q6P9U0	0.142763	0.142763	0.215498	0.314896	102	Q6P9U0	Serpinb6a	Serine (Or cysteine) peptidase inhibitor, clade B, member 6a	Q6P9U0_RAT	18	10.4017	1.10402
PD7 / VD7	P19468	P19468	-0.185239	0.185239	0.215676	0.314896	20	P19468	Gclc	Glutamate--cysteine ligase catalytic subunit	GSH1_RAT	5	-12.0497	0.879503
PD7 / VD7	A0A0H2UHZ4;O35986	A0A0H2UHZ4;O35986	NaN	NaN	0.233801	0.328834	4	A0A0H2UHZ4;O35986	Zranb2	Zinc finger Ran-binding domain-containing protein 2	A0A0H2UHZ4_RAT;ZRAB2_RAT	1	NaN	NaN
PD7 / VD7	F1M542;M0R5P8	F1M542;M0R5P8	-0.0826353	0.0826353	0.215748	0.314896	20	F1M542;M0R5P8	Adam22	ADAM metallopeptidase domain 22	F1M542_RAT;M0R5P8_RAT	4	-5.56689	0.944331
PD7 / VD7	F1LPB8;Q6P6S9	F1LPB8;Q6P6S9	-0.455738	0.455738	0.21647	0.315358	20	F1LPB8;Q6P6S9	Entpd5	Ectonucleoside triphosphate diphosphohydrolase 5	F1LPB8_RAT;ENTP5_RAT	5	-27.0863	0.729137
PD7 / VD7	A0A0G2JX77;A0A0G2K7S6;F1LSM3;Q9R037	A0A0G2JX77;A0A0G2K7S6;F1LSM3;Q9R037	0.513248	0.513248	0.216571	0.315358	12	A0A0G2JX77;A0A0G2K7S6;F1LSM3;Q9R037	Wdr44	WD repeat-containing protein 44	A0A0G2JX77_RAT;A0A0G2K7S6_RAT;F1LSM3_RAT;WDR44_RAT	3	42.726	1.42726
PD7 / VD7	D3ZJG3	D3ZJG3	-0.0196531	0.0196531	0.216411	0.315358	12	D3ZJG3	P4htm	Prolyl 4-hydroxylase, transmembrane	D3ZJG3_RAT	3	-1.35302	0.98647
PD7 / VD7	F1LMB9;O54921	F1LMB9;O54921	0.0851788	0.0851788	0.217434	0.316409	24	F1LMB9;O54921	Exoc2	Exocyst complex component 2	F1LMB9_RAT;EXOC2_RAT	6	6.08192	1.06082
PD7 / VD7	D3ZPI8	D3ZPI8	-0.119579	0.119579	0.217782	0.316727	8	D3ZPI8	C8g	Complement C8 gamma chain	D3ZPI8_RAT	2	-7.9544	0.920456
PD7 / VD7	F1LQV9;M0R7K1;Q9Z250	F1LQV9;M0R7K1;Q9Z250	NaN	NaN	0.236811	0.330361	4	F1LQV9;M0R7K1;Q9Z250	Lin7a	Protein lin-7 homolog;Protein lin-7 homolog;Protein lin-7 homolog A	F1LQV9_RAT;M0R7K1_RAT;LIN7A_RAT	1	NaN	NaN
PD7 / VD7	A0A0G2K1C0;Q4V7C7	A0A0G2K1C0;Q4V7C7	0.198408	0.198408	0.218051	0.316928	92	A0A0G2K1C0;Q4V7C7	Actr3	Actin-related protein 3	A0A0G2K1C0_RAT;ARP3_RAT	18	14.7431	1.14743
PD7 / VD7	Q63525	Q63525	0.195457	0.195457	0.218358	0.317185	76	Q63525	Nudc	Nuclear migration protein nudC	NUDC_RAT	13	14.5087	1.14509
PD7 / VD7	Q3ZB99	Q3ZB99	0.0310589	0.0310589	0.219516	0.317427	80	Q3ZB99	Tjp2	Tight junction protein 2	Q3ZB99_RAT	18	2.17618	1.02176
PD7 / VD7	E9PSY8	E9PSY8	0.00998749	0.00998749	0.219206	0.317427	84	E9PSY8	Eps15	Epidermal growth factor receptor pathway substrate 15	E9PSY8_RAT	18	0.694682	1.00695
PD7 / VD7	A0A0G2K110;Q3KRD8	A0A0G2K110;Q3KRD8	0.244793	0.244793	0.219027	0.317427	20	A0A0G2K110;Q3KRD8	Eif6	Eukaryotic translation initiation factor 6	A0A0G2K110_RAT;IF6_RAT	4	18.4922	1.18492
PD7 / VD7	D3ZPU3;Q6P7R8	D3ZPU3;Q6P7R8	-0.0165739	0.0165739	0.219697	0.317427	36	D3ZPU3;Q6P7R8	Hsd17b12	Very-long-chain 3-oxoacyl-CoA reductase	D3ZPU3_RAT;DHB12_RAT	8	-1.14224	0.988578
PD7 / VD7	P63170	P63170	NaN	NaN	0.235925	0.330361	6	P63170	Dynll1	Dynein light chain 1, cytoplasmic	DYL1_RAT	1	NaN	NaN
PD7 / VD7	Q5BJR4	Q5BJR4	NaN	NaN	0.236922	0.330361	4	Q5BJR4	Prune2	Protein prune homolog 2	PRUN2_RAT	1	NaN	NaN
PD7 / VD7	G3V8D5;P85971	G3V8D5;P85971	-0.127915	0.127915	0.219124	0.317427	28	G3V8D5;P85971	Pgls	6-phosphogluconolactonase	G3V8D5_RAT;6PGL_RAT	6	-8.48472	0.915153
PD7 / VD7	P28064	P28064	0.774003	0.774003	0.219027	0.317427	8	P28064	Psmb8	Proteasome subunit beta type-8	PSB8_RAT	2	71.0008	1.71001
PD7 / VD7	P04166	P04166	-0.703685	0.703685	0.218988	0.317427	8	P04166	Cyb5b	Cytochrome b5 type B	CYB5B_RAT	2	-38.5998	0.614002
PD7 / VD7	G3V8P5;Q499P8	G3V8P5;Q499P8	-0.189437	0.189437	0.219572	0.317427	8	G3V8P5;Q499P8	RGD1310127;	Similar to cDNA sequence BC017158;RUS1 family protein C16orf58 homolog	G3V8P5_RAT;RUS1_RAT	2	-12.3052	0.876948
PD7 / VD7	D3ZIV8	D3ZIV8	NaN	NaN	0.237979	0.33089	4	D3ZIV8	Ythdc2	YTH domain-containing 2	D3ZIV8_RAT	1	NaN	NaN
PD7 / VD7	P09117	P09117	0.229586	0.229586	0.220782	0.318752	156	P09117	Aldoc	Fructose-bisphosphate aldolase C	ALDOC_RAT	25	17.2499	1.1725
PD7 / VD7	A0MV40	A0MV40	NaN	NaN	0.238332	0.331002	4	A0MV40	Shisa4	Proline rich membrane protein	A0MV40_RAT	1	NaN	NaN
PD7 / VD7	A0A0G2K0B6	A0A0G2K0B6	0.167923	0.167923	0.221131	0.318752	56	A0A0G2K0B6	Snap91	Clathrin coat assembly protein AP180	A0A0G2K0B6_RAT	11	12.344	1.12344
PD7 / VD7	A0JPL2;D3ZRE3;P97633	A0JPL2;D3ZRE3;P97633	0.24741	0.24741	0.220885	0.318752	20	A0JPL2;D3ZRE3;P97633	Csnk1a1	Casein kinase 1, alpha 1, isoform CRA_d;Casein kinase I isoform alpha;Casein kinase I isoform alpha	A0JPL2_RAT;D3ZRE3_RAT;KC1A_RAT	4	18.7074	1.18707
PD7 / VD7	Q80ZA3	Q80ZA3	0.00371884	0.00371884	0.221138	0.318752	48	Q80ZA3	Serpinf1	Alpha-2 antiplasmin	Q80ZA3_RAT	10	0.258103	1.00258
PD7 / VD7	P27615	P27615	-0.206568	0.206568	0.221443	0.319004	36	P27615	Scarb2	Lysosome membrane protein 2	SCRB2_RAT	8	-13.3404	0.866596
PD7 / VD7	G3V9R9;P36953	G3V9R9;P36953	-0.171373	0.171373	0.221771	0.319099	96	G3V9R9;P36953	Afm	Afamin	G3V9R9_RAT;AFAM_RAT	18	-11.2003	0.887997
PD7 / VD7	A0A0G2JU56;F1M836;Q8VHF0	A0A0G2JU56;F1M836;Q8VHF0	-0.188984	0.188984	0.221668	0.319099	20	A0A0G2JU56;F1M836;Q8VHF0	Mark3	Non-specific serine/threonine protein kinase;Non-specific serine/threonine protein kinase;MAP/microtubule affinity-regulating kinase 3	A0A0G2JU56_RAT;F1M836_RAT;MARK3_RAT	4	-12.2777	0.877223
PD7 / VD7	Q5RJN0	Q5RJN0	0.232817	0.232817	0.223604	0.320823	44	Q5RJN0	Ndufs7	NADH dehydrogenase (Ubiquinone) Fe-S protein 7	Q5RJN0_RAT	7	17.5127	1.17513
PD7 / VD7	A0A0G2K583	A0A0G2K583	-0.135991	0.135991	0.223361	0.320823	36	A0A0G2K583	Mtap	S-methyl-5'-thioadenosine phosphorylase	A0A0G2K583_RAT	7	-8.99558	0.910044
PD7 / VD7	F1LXF1	F1LXF1	NaN	NaN	0.240225	0.331927	4	F1LXF1	Bcr	BCR activator of RhoGEF and GTPase	F1LXF1_RAT	1	NaN	NaN
PD7 / VD7	Q68FW9	Q68FW9	0.0613734	0.0613734	0.223771	0.320823	40	Q68FW9	Cops3	COP9 signalosome complex subunit 3	CSN3_RAT	6	4.34587	1.04346
PD7 / VD7	A0A0G2JWG1;D4A4J3	A0A0G2JWG1;D4A4J3	-0.199738	0.199738	0.223579	0.320823	8	A0A0G2JWG1;D4A4J3	Man2a2	Alpha-mannosidase	A0A0G2JWG1_RAT;D4A4J3_RAT	2	-12.9292	0.870708
PD7 / VD7	Q66H15	Q66H15	-0.639461	0.639461	0.22377	0.320823	12	Q66H15	Rmdn3	Regulator of microtubule dynamics protein 3	RMD3_RAT	3	-35.8047	0.641953
PD7 / VD7	G3V719	G3V719	NaN	NaN	0.241276	0.332624	8	G3V719	Plscr4	Phospholipid scramblase	G3V719_RAT	1	NaN	NaN
PD7 / VD7	B2RYA8;D4ABC2	B2RYA8;D4ABC2	0.0368347	0.0368347	0.224023	0.320823	12	B2RYA8;D4ABC2	Dnajb2	DnaJ heat shock protein family (Hsp40) member B2	B2RYA8_RAT;D4ABC2_RAT	3	2.58606	1.02586
PD7 / VD7	D3ZS72	D3ZS72	-0.277347	0.277347	0.223985	0.320823	12	D3ZS72	Prex1	Phosphatidylinositol-3,4,5-trisphosphate-dependent Rac exchange factor 1	D3ZS72_RAT	3	-17.4893	0.825107
PD7 / VD7	P23358	P23358	0.133004	0.133004	0.224457	0.320897	40	P23358	Rpl12	60S ribosomal protein L12	RL12_RAT	6	9.65748	1.09657
PD7 / VD7	E9PT65	E9PT65	-0.380476	0.380476	0.224457	0.320897	36	E9PT65	Rdx	Radixin	E9PT65_RAT	7	-23.1816	0.768184
PD7 / VD7	Q4V7C6	Q4V7C6	0.0133887	0.0133887	0.22447	0.320897	44	Q4V7C6	Gmps	GMP synthase [glutamine-hydrolyzing]	GUAA_RAT	11	0.932357	1.00932
PD7 / VD7	D3ZVB7	D3ZVB7	0.0303465	0.0303465	0.225278	0.321675	108	D3ZVB7	Ogn	Osteoglycin	D3ZVB7_RAT	14	2.12574	1.02126
PD7 / VD7	A0A1W2Q680;Q6AYA1	A0A1W2Q680;Q6AYA1	-0.22227	0.22227	0.22523	0.321675	8	A0A1W2Q680;Q6AYA1	Gar1	H/ACA ribonucleoprotein complex subunit (Fragment);H/ACA ribonucleoprotein complex subunit 1	A0A1W2Q680_RAT;GAR1_RAT	2	-14.2784	0.857216
PD7 / VD7	F1LMJ8	F1LMJ8	NaN	NaN	0.244143	0.33506	4	F1LMJ8	Micu2	Calcium uptake protein 2, mitochondrial	F1LMJ8_RAT	1	NaN	NaN
PD7 / VD7	A0A0G2JUV4;A0A0G2JWU3;D3ZFE9;F1M9A4	A0A0G2JUV4;A0A0G2JWU3;D3ZFE9;F1M9A4	NaN	NaN	0.244703	0.33564	4	A0A0G2JUV4;A0A0G2JWU3;D3ZFE9;F1M9A4	Mrpl1;LOC100359687;LOC100359687;Mrpl1	Mitochondrial ribosomal protein L1;Mitochondrial ribosomal protein L1-like;Mitochondrial ribosomal protein L1-like;Mitochondrial ribosomal protein L1	A0A0G2JUV4_RAT;A0A0G2JWU3_RAT;D3ZFE9_RAT;F1M9A4_RAT	1	NaN	NaN
PD7 / VD7	A0A0G2JX25;Q5FVP6	A0A0G2JX25;Q5FVP6	0.527074	0.527074	0.225697	0.321895	16	A0A0G2JX25;Q5FVP6	Gmpr2	GMP reductase	A0A0G2JX25_RAT;Q5FVP6_RAT	3	44.1004	1.441
PD7 / VD7	F1M446	F1M446	-0.0455162	0.0455162	0.226176	0.322321	60	F1M446	Ecpas	Ecm29 proteasome adaptor and scaffold	F1M446_RAT	14	-3.10569	0.968943
PD7 / VD7	G3V631	G3V631	-0.258337	0.258337	0.22626	0.322321	8	G3V631	Rabgef1	RAB guanine nucleotide exchange factor (GEF) 1 (Predicted), isoform CRA_a	G3V631_RAT	2	-16.3949	0.836051
PD7 / VD7	A0A0G2JSS9	A0A0G2JSS9	-0.0291486	0.0291486	0.226666	0.322712	52	A0A0G2JSS9	Atl3	Atlastin-3	A0A0G2JSS9_RAT	9	-2.00016	0.979998
PD7 / VD7	F1LPG5	F1LPG5	-0.627334	0.627334	0.228166	0.324278	8	F1LPG5	Ndufb4	NADH:ubiquinone oxidoreductase subunit B4	F1LPG5_RAT	2	-35.2628	0.647372
PD7 / VD7	D4A7C0	D4A7C0	NaN	NaN	0.245093	0.335707	8	D4A7C0	Gpn2	GPN-loop GTPase 2	GPN2_RAT	1	NaN	NaN
PD7 / VD7	B2GV49	B2GV49	NaN	NaN	0.245359	0.335707	4	B2GV49	Ccdc87	Coiled-coil domain-containing 87	B2GV49_RAT	1	NaN	NaN
PD7 / VD7	A0A0G2K0Q2	A0A0G2K0Q2	0.0489641	0.0489641	0.228731	0.324861	56	A0A0G2K0Q2	Kif5a	Kinesin heavy chain isoform 5A	A0A0G2K0Q2_RAT	13	3.45218	1.03452
PD7 / VD7	D3ZBC7	D3ZBC7	NaN	NaN	0.246302	0.33613	4	D3ZBC7	Dhrs13	Dehydrogenase/reductase 13	D3ZBC7_RAT	1	NaN	NaN
PD7 / VD7	Q711G3	Q711G3	-0.146438	0.146438	0.228843	0.324861	16	Q711G3	Iah1	Isoamyl acetate-hydrolyzing esterase 1 homolog	IAH1_RAT	4	-9.65213	0.903479
PD7 / VD7	P00762	P00762	NaN	NaN	0.246915	0.336603	4	P00762	Prss1	Anionic trypsin-1	TRY1_RAT	1	NaN	NaN
PD7 / VD7	A0A0G2K7M2;Q5XFX7	A0A0G2K7M2;Q5XFX7	NaN	NaN	0.247098	0.336651	4	A0A0G2K7M2;Q5XFX7	Rad23a	RAD23 homolog A, nucleotide excision repair protein;RAD23 homolog A (S. cerevisiae)	A0A0G2K7M2_RAT;Q5XFX7_RAT	1	NaN	NaN
PD7 / VD7	A0A0G2K8K0	A0A0G2K8K0	0.189238	0.189238	0.229769	0.325606	100	A0A0G2K8K0	Sfpq	Splicing factor proline and glutamine rich	A0A0G2K8K0_RAT	18	14.0161	1.14016
PD7 / VD7	P50398	P50398	0.270055	0.270055	0.230377	0.326278	136	P50398	Gdi1	Rab GDP dissociation inhibitor alpha	GDIA_RAT	22	20.5853	1.20585
PD7 / VD7	B5DEZ6	B5DEZ6	-0.0499479	0.0499479	0.230674	0.326319	20	B5DEZ6	Gnpda2	Glucosamine-6-phosphate isomerase	B5DEZ6_RAT	5	-3.40288	0.965971
PD7 / VD7	F1LPM3	F1LPM3	-0.197815	0.197815	0.231519	0.326946	16	F1LPM3	Sorbs2	Sorbin and SH3 domain-containing protein 2	F1LPM3_RAT	4	-12.813	0.87187
PD7 / VD7	A0A0G2QC62;D4A888;F1LYI5;M0R665;P25886	A0A0G2QC62;D4A888;F1LYI5;M0R665;P25886	NaN	NaN	0.248532	0.337617	4	A0A0G2QC62;D4A888;F1LYI5;M0R665;P25886	;;;;Rpl29	60S ribosomal protein L29	A0A0G2QC62_RAT;D4A888_RAT;F1LYI5_RAT;M0R665_RAT;RL29_RAT	1	NaN	NaN
PD7 / VD7	D4A0W1	D4A0W1	NaN	NaN	0.248405	0.337617	4	D4A0W1	Emc4	ER membrane protein complex subunit 4	D4A0W1_RAT	1	NaN	NaN
PD7 / VD7	Q91Y81	Q91Y81	0.0844999	0.0844999	0.232056	0.327323	72	Q91Y81	2020-09-02	Septin-2	SEPT2_RAT	13	6.03201	1.06032
PD7 / VD7	Q62665;Q6IN24	Q62665;Q6IN24	0.508218	0.508218	0.231974	0.327323	8	Q62665;Q6IN24	Lgals8	Galectin-8;Galectin	LEG8_RAT;Q6IN24_RAT	2	42.2292	1.42229
PD7 / VD7	F1M9P7;M0R592	F1M9P7;M0R592	NaN	NaN	0.24911	0.337692	4	F1M9P7;M0R592	Mamdc2	MAM domain containing 2	F1M9P7_RAT;M0R592_RAT	1	NaN	NaN
PD7 / VD7	Q9Z122	Q9Z122	-0.344346	0.344346	0.232577	0.327869	12	Q9Z122	Fads2	Acyl-CoA 6-desaturase	FADS2_RAT	3	-21.2335	0.787665
PD7 / VD7	A0A0G2K7Q7;P35559	A0A0G2K7Q7;P35559	-0.00656322	0.00656322	0.232736	0.327904	24	A0A0G2K7Q7;P35559	Ide	Insulin-degrading enzyme	A0A0G2K7Q7_RAT;IDE_RAT	6	-0.453895	0.995461
PD7 / VD7	F1LSP0	F1LSP0	-0.440424	0.440424	0.233048	0.328154	12	F1LSP0	Tmprss5	Transmembrane protease, serine 5 (Spinesin), isoform CRA_a	F1LSP0_RAT	3	-26.3082	0.736918
PD7 / VD7	Q68FZ8	Q68FZ8	-0.192199	0.192199	0.233567	0.328693	12	Q68FZ8	Pccb	Propionyl coenzyme A carboxylase, beta polypeptide	Q68FZ8_RAT	3	-12.473	0.87527
PD7 / VD7	A0A0G2JY08	A0A0G2JY08	0.198853	0.198853	0.234291	0.329034	144	A0A0G2JY08	Myo18a	Myosin XVIIIa	A0A0G2JY08_RAT	35	14.7785	1.14779
PD7 / VD7	Q99M64	Q99M64	-0.0494434	0.0494434	0.234349	0.329034	32	Q99M64	Pi4k2a	Phosphatidylinositol 4-kinase type 2-alpha	P4K2A_RAT	8	-3.36909	0.966309
PD7 / VD7	O35274	O35274	-0.601978	0.601978	0.234193	0.329034	8	O35274	Ppp1r9b	Neurabin-2	NEB2_RAT	2	-34.115	0.65885
PD7 / VD7	D3ZMX6	D3ZMX6	0.149977	0.149977	0.235269	0.330135	36	D3ZMX6	Sntb2	Syntrophin, beta 2	D3ZMX6_RAT	9	10.9551	1.10955
PD7 / VD7	A0A0G2JSL5;A0A0G2K4B4;P20646	A0A0G2JSL5;A0A0G2K4B4;P20646	NaN	NaN	0.249875	0.337815	4	A0A0G2JSL5;A0A0G2K4B4;P20646	Acpp	Prostatic acid phosphatase	A0A0G2JSL5_RAT;A0A0G2K4B4_RAT;PPAP_RAT	1	NaN	NaN
PD7 / VD7	Q6MGB5	Q6MGB5	NaN	NaN	0.250922	0.337815	4	Q6MGB5	Hsd17b8	Estradiol 17-beta-dehydrogenase 8	DHB8_RAT	1	NaN	NaN
PD7 / VD7	A0A0U1RRQ1;G3V9S6	A0A0U1RRQ1;G3V9S6	NaN	NaN	0.250528	0.337815	4	A0A0U1RRQ1;G3V9S6	Ndufa1	NADH:ubiquinone oxidoreductase subunit A1	A0A0U1RRQ1_RAT;G3V9S6_RAT	1	NaN	NaN
PD7 / VD7	A0A0G2K2J4;D4A2H6	A0A0G2K2J4;D4A2H6	NaN	NaN	0.250041	0.337815	4	A0A0G2K2J4;D4A2H6	Rbfox3	RNA binding protein fox-1 homolog	A0A0G2K2J4_RAT;D4A2H6_RAT	1	NaN	NaN
PD7 / VD7	F1MA89	F1MA89	NaN	NaN	0.250566	0.337815	4	F1MA89	Ccny	Cyclin Y	F1MA89_RAT	1	NaN	NaN
PD7 / VD7	A0A0G2JUX4;F1MAA1	A0A0G2JUX4;F1MAA1	0.0641777	0.0641777	0.235542	0.330328	16	A0A0G2JUX4;F1MAA1	Usp47	Ubiquitin-specific peptidase 47	A0A0G2JUX4_RAT;F1MAA1_RAT	4	4.54889	1.04549
PD7 / VD7	A0A0G2K695;D4ACN7	A0A0G2K695;D4ACN7	-0.111116	0.111116	0.23674	0.330361	12	A0A0G2K695;D4ACN7	Myof	Myoferlin	A0A0G2K695_RAT;D4ACN7_RAT	2	-7.41282	0.925872
PD7 / VD7	A0A0G2K464;Q9JKE3	A0A0G2K464;Q9JKE3	NaN	NaN	0.251531	0.338003	4	A0A0G2K464;Q9JKE3	Scamp5	Secretory carrier-associated membrane protein;Secretory carrier-associated membrane protein 5	A0A0G2K464_RAT;SCAM5_RAT	1	NaN	NaN
PD7 / VD7	Q5XIN6	Q5XIN6	0.111376	0.111376	0.236864	0.330361	88	Q5XIN6	Letm1	Mitochondrial proton/calcium exchanger protein	LETM1_RAT	17	8.02582	1.08026
PD7 / VD7	P07483	P07483	0.226391	0.226391	0.236158	0.330361	20	P07483	Fabp3	Fatty acid-binding protein, heart	FABPH_RAT	3	16.9905	1.1699
PD7 / VD7	D3ZCT5	D3ZCT5	-0.0175336	0.0175336	0.235949	0.330361	16	D3ZCT5	Pald1	Phosphatase domain-containing, paladin 1	D3ZCT5_RAT	4	-1.20798	0.98792
PD7 / VD7	P43138	P43138	0.0580585	0.0580585	0.236786	0.330361	32	P43138	Apex1	DNA-(apurinic or apyrimidinic site) lyase	APEX1_RAT	7	4.10638	1.04106
PD7 / VD7	Q9JHB5	Q9JHB5	-0.0707185	0.0707185	0.236836	0.330361	12	Q9JHB5	Tsnax	Translin-associated protein X	TSNAX_RAT	3	-4.78363	0.952164
PD7 / VD7	Q9R1T1	Q9R1T1	-0.524053	0.524053	0.236268	0.330361	8	Q9R1T1	Banf1	Barrier-to-autointegration factor	BAF_RAT	2	-30.4585	0.695415
PD7 / VD7	F1M957	F1M957	0.695328	0.695328	0.237421	0.330651	56	F1M957	Vwf	von Willebrand factor	F1M957_RAT	12	61.9252	1.61925
PD7 / VD7	Q5XI39	Q5XI39	-0.0442102	0.0442102	0.237332	0.330651	8	Q5XI39	Cryzl1	Crystallin zeta-like 1	Q5XI39_RAT	2	-3.01794	0.969821
PD7 / VD7	G3V798	G3V798	-0.22708	0.22708	0.237536	0.330651	8	G3V798	Srsf4	Serine and arginine-rich-splicing factor 4	G3V798_RAT	2	-14.5638	0.854362
PD7 / VD7	B0BNG3	B0BNG3	0.0908879	0.0908879	0.23798	0.33089	48	B0BNG3	Lman2	Lectin, mannose-binding 2	B0BNG3_RAT	10	6.50254	1.06503
PD7 / VD7	A0A0G2K8Q7	A0A0G2K8Q7	0.0144447	0.0144447	0.238132	0.330913	20	A0A0G2K8Q7	Lsm2	U6 snRNA-associated Sm-like protein LSm2	A0A0G2K8Q7_RAT	4	1.00626	1.01006
PD7 / VD7	Q5FWT1	Q5FWT1	-0.144505	0.144505	0.238614	0.331204	24	Q5FWT1	Fam98a	Protein FAM98A	FA98A_RAT	5	-9.53106	0.904689
PD7 / VD7	O55096	O55096	0.159694	0.159694	0.238805	0.33128	96	O55096	Dpp3	Dipeptidyl peptidase 3	DPP3_RAT	19	11.7051	1.11705
PD7 / VD7	A0A0G2K6U1;F1LQ81	A0A0G2K6U1;F1LQ81	0.100631	0.100631	0.238944	0.331285	184	A0A0G2K6U1;F1LQ81	Nsf	Vesicle-fusing ATPase;N-ethylmaleimide sensitive fusion protein, isoform CRA_b	A0A0G2K6U1_RAT;F1LQ81_RAT	36	7.22426	1.07224
PD7 / VD7	Q5U1X1	Q5U1X1	0.623166	0.623166	0.239275	0.331554	20	Q5U1X1	Rexo2	Oligoribonuclease, mitochondrial	ORN_RAT	4	54.0252	1.54025
PD7 / VD7	D3ZZ21	D3ZZ21	0.0416057	0.0416057	0.239899	0.331665	12	D3ZZ21	Ndufb6	NADH dehydrogenase (Ubiquinone) 1 beta subcomplex, 6 (Predicted)	D3ZZ21_RAT	2	2.92588	1.02926
PD7 / VD7	A0A0G2KAI1;F1LMX4;Q63421	A0A0G2KAI1;F1LMX4;Q63421	-0.600507	0.600507	0.239779	0.331665	8	A0A0G2KAI1;F1LMX4;Q63421	Pde1c	Phosphodiesterase;Phosphodiesterase;Calcium/calmodulin-dependent 3',5'-cyclic nucleotide phosphodiesterase 1C	A0A0G2KAI1_RAT;F1LMX4_RAT;PDE1C_RAT	2	-34.0478	0.659522
PD7 / VD7	B1WBU8	B1WBU8	0.0140912	0.0140912	0.239741	0.331665	12	B1WBU8	Plekhd1	Pleckstrin homology domain-containing family D member 1	PLHD1_RAT	3	0.981514	1.00982
PD7 / VD7	Q63639	Q63639	-0.655549	0.655549	0.239703	0.331665	12	Q63639	Aldh1a2	Retinal dehydrogenase 2	AL1A2_RAT	3	-36.5166	0.634834
PD7 / VD7	E9PTT0	E9PTT0	-0.670299	0.670299	0.240476	0.332086	8	E9PTT0	Zdhhc17	Palmitoyltransferase ZDHHC17	ZDH17_RAT	2	-37.1624	0.628376
PD7 / VD7	P10888	P10888	0.162795	0.162795	0.240867	0.332302	36	P10888	Cox4i1	Cytochrome c oxidase subunit 4 isoform 1, mitochondrial	COX41_RAT	7	11.9454	1.11945
PD7 / VD7	D3ZJX5	D3ZJX5	0.00393733	0.00393733	0.240905	0.332302	20	D3ZJX5	Timm50	Mitochondrial import inner membrane translocase subunit TIM50	D3ZJX5_RAT	5	0.273288	1.00273
PD7 / VD7	M0RCH5	M0RCH5	-0.000777166	0.000777166	0.241479	0.332717	20	M0RCH5	Gnpda1	Glucosamine-6-phosphate isomerase	M0RCH5_RAT	5	-0.0538545	0.999461
PD7 / VD7	P50430	P50430	NaN	NaN	0.259386	0.343778	4	P50430	Arsb	Arylsulfatase B	ARSB_RAT	1	NaN	NaN
PD7 / VD7	Q66HG4	Q66HG4	0.461448	0.461448	0.24291	0.334121	16	Q66HG4	Galm	Aldose 1-epimerase	GALM_RAT	3	37.6923	1.37692
PD7 / VD7	Q6MG08	Q6MG08	0.12836	0.12836	0.242812	0.334121	48	Q6MG08	Abcf1	ATP-binding cassette sub-family F member 1	ABCF1_RAT	12	9.30501	1.09305
PD7 / VD7	F1M964;P20069;Q68FX8	F1M964;P20069;Q68FX8	0.1813	0.1813	0.242652	0.334121	16	F1M964;P20069;Q68FX8	Pmpca	Mitochondrial-processing peptidase subunit alpha	F1M964_RAT;MPPA_RAT;Q68FX8_RAT	4	13.3905	1.13391
PD7 / VD7	A0A0G2K747;G3V7K6;P28042	A0A0G2K747;G3V7K6;P28042	0.156731	0.156731	0.243616	0.334903	24	A0A0G2K747;G3V7K6;P28042	Ssbp1	Single-stranded DNA binding protein 1, isoform CRA_b;Single-stranded DNA-binding protein, mitochondrial;Single-stranded DNA-binding protein, mitochondrial	A0A0G2K747_RAT;G3V7K6_RAT;SSBP_RAT	4	11.4758	1.11476
PD7 / VD7	Q68FT9	Q68FT9	-1.20551	1.20551	0.243977	0.33506	8	Q68FT9	Scly	Selenocysteine lyase	SCLY_RAT	2	-56.6385	0.433615
PD7 / VD7	F1LN03;P0C1Q3	F1LN03;P0C1Q3	NaN	NaN	0.260654	0.344521	4	F1LN03;P0C1Q3	Lpcat2	Lysophosphatidylcholine acyltransferase 2	F1LN03_RAT;PCAT2_RAT	1	NaN	NaN
PD7 / VD7	B2RYM2	B2RYM2	-0.278087	0.278087	0.244126	0.33506	8	B2RYM2	Wipi1	WD repeat domain, phosphoinositide-interacting 1	B2RYM2_RAT	2	-17.5316	0.824684
PD7 / VD7	Q5XIF3	Q5XIF3	-0.0750772	0.0750772	0.245716	0.335707	28	Q5XIF3	Ndufs4	NADH dehydrogenase [ubiquinone] iron-sulfur protein 4, mitochondrial	NDUS4_RAT	5	-5.07087	0.949291
PD7 / VD7	Q5I0D7	Q5I0D7	0.0450577	0.0450577	0.24569	0.335707	44	Q5I0D7	Pepd	Xaa-Pro dipeptidase	PEPD_RAT	10	3.17245	1.03172
PD7 / VD7	P83871;Q7TPJ6	P83871;Q7TPJ6	0.284162	0.284162	0.245513	0.335707	8	P83871;Q7TPJ6	Phf5a	PHD finger-like domain-containing protein 5A;Ac2-246	PHF5A_RAT;Q7TPJ6_RAT	2	21.7703	1.2177
PD7 / VD7	Q5XII0	Q5XII0	0.226714	0.226714	0.245276	0.335707	36	Q5XII0	Epdr1	Mammalian ependymin-related protein 1	EPDR1_RAT	7	17.0166	1.17017
PD7 / VD7	Q63151	Q63151	0.455965	0.455965	0.245341	0.335707	28	Q63151	Acsl3	Long-chain-fatty-acid--CoA ligase 3	ACSL3_RAT	7	37.17	1.3717
PD7 / VD7	Q4FZU0	Q4FZU0	-0.0809894	0.0809894	0.246038	0.335957	20	Q4FZU0	Acp6	Acid phosphatase 6, lysophosphatidic	Q4FZU0_RAT	5	-5.45909	0.945409
PD7 / VD7	Q27W02	Q27W02	0.324208	0.324208	0.246925	0.336603	16	Q27W02	Magoh	Protein mago nashi homolog	MGN_RAT	3	25.1977	1.25198
PD7 / VD7	Q5FVM4	Q5FVM4	0.136976	0.136976	0.247262	0.336685	65	Q5FVM4	Nono	Non-POU domain-containing octamer-binding protein	NONO_RAT	13	9.95982	1.0996
PD7 / VD7	A0A0G2K0T5;F1LNV5;Q6P6Q9	A0A0G2K0T5;F1LNV5;Q6P6Q9	NaN	NaN	0.263516	0.346238	4	A0A0G2K0T5;F1LNV5;Q6P6Q9	Micu1	Calcium uptake protein 1, mitochondrial;Calcium uptake protein 1, mitochondrial;Calcium uptake protein 1, mitochondrial	A0A0G2K0T5_RAT;F1LNV5_RAT;MICU1_RAT	1	NaN	NaN
PD7 / VD7	M0RCH4	M0RCH4	NaN	NaN	0.263101	0.346238	4	M0RCH4	NaN	Uncharacterized protein	M0RCH4_RAT	1	NaN	NaN
PD7 / VD7	Q7TPH3;Q7TPH4	Q7TPH3;Q7TPH4	NaN	NaN	0.263754	0.346363	4	Q7TPH3;Q7TPH4	Dmd	Dystrophin	Q7TPH3_RAT;Q7TPH4_RAT	1	NaN	NaN
PD7 / VD7	F1M7S2;Q5XIU5	F1M7S2;Q5XIU5	-0.0327303	0.0327303	0.247867	0.33732	28	F1M7S2;Q5XIU5	Psmf1	Proteasome inhibitor PI31 subunit	F1M7S2_RAT;PSMF1_RAT	5	-2.24315	0.977568
PD7 / VD7	M0R9T2	M0R9T2	-0.309237	0.309237	0.248122	0.33748	8	M0R9T2	Erbin	Erbb2-interacting protein	M0R9T2_RAT	2	-19.2931	0.807069
PD7 / VD7	Q3T1J1	Q3T1J1	0.07033	0.07033	0.248639	0.337617	28	Q3T1J1	Eif5a	Eukaryotic translation initiation factor 5A-1	IF5A1_RAT	4	4.99568	1.04996
PD7 / VD7	D4A8A0	D4A8A0	0.0655365	0.0655365	0.249093	0.337692	48	D4A8A0	Cad	Carbamoyl-phosphate synthetase 2, aspartate transcarbamylase, and dihydroorotase	D4A8A0_RAT	12	4.6474	1.04647
PD7 / VD7	P35053;Q6P7Q2	P35053;Q6P7Q2	-0.284062	0.284062	0.248967	0.337692	8	P35053;Q6P7Q2	Gpc1	Glypican-1	GPC1_RAT;Q6P7Q2_RAT	2	-17.8724	0.821276
PD7 / VD7	P20059	P20059	0.304752	0.304752	0.249846	0.337815	164	P20059	Hpx	Hemopexin	HEMO_RAT	27	23.5206	1.23521
PD7 / VD7	B1WC73	B1WC73	NaN	NaN	0.2659	0.347682	4	B1WC73	Arl6	ADP-ribosylation factor-like 6 (Predicted), isoform CRA_a	B1WC73_RAT	1	NaN	NaN
PD7 / VD7	F1M9W9	F1M9W9	NaN	NaN	0.265823	0.347682	4	F1M9W9	Trappc8	Similar to TRS85 homolog (Predicted)	F1M9W9_RAT	1	NaN	NaN
PD7 / VD7	P51635	P51635	0.105462	0.105462	0.251004	0.337815	72	P51635	Akr1a1	Aldo-keto reductase family 1 member A1	AK1A1_RAT	13	7.58388	1.07584
PD7 / VD7	Q63617;Q6P136	Q63617;Q6P136	0.156938	0.156938	0.250622	0.337815	180	Q63617;Q6P136	Hyou1	Hypoxia up-regulated protein 1;Hyou1 protein	HYOU1_RAT;Q6P136_RAT	33	11.4918	1.11492
PD7 / VD7	E9PSK7	E9PSK7	-0.238673	0.238673	0.250286	0.337815	12	E9PSK7	Mapk8ip3	C-Jun-amino-terminal kinase-interacting protein 3	JIP3_RAT	3	-15.2476	0.847524
PD7 / VD7	P12369	P12369	-0.0476455	0.0476455	0.25086	0.337815	56	P12369	Prkar2b	cAMP-dependent protein kinase type II-beta regulatory subunit	KAP3_RAT	12	-3.2486	0.967514
PD7 / VD7	D4A720	D4A720	-0.282168	0.282168	0.249824	0.337815	12	D4A720	Srsf7	RCG61762, isoform CRA_d	D4A720_RAT	3	-17.7646	0.822354
PD7 / VD7	Q5U2U3	Q5U2U3	0.120978	0.120978	0.250698	0.337815	12	Q5U2U3	Parp3	Poly [ADP-ribose] polymerase	Q5U2U3_RAT	2	8.74716	1.08747
PD7 / VD7	F1M1A6	F1M1A6	0.237292	0.237292	0.250241	0.337815	12	F1M1A6	LOC681355	Similar to potassium channel tetramerisation domain-containing 12b	F1M1A6_RAT	2	17.8778	1.17878
PD7 / VD7	Q9WVS2	Q9WVS2	-0.118252	0.118252	0.25135	0.338003	12	Q9WVS2	Osgep	Probable tRNA N6-adenosine threonylcarbamoyltransferase	OSGEP_RAT	3	-7.86966	0.921303
PD7 / VD7	P62775	P62775	NaN	NaN	0.268156	0.349835	4	P62775	Mtpn	Myotrophin	MTPN_RAT	1	NaN	NaN
PD7 / VD7	Q02589	Q02589	0.272065	0.272065	0.251559	0.338003	16	Q02589	Adprh	[Protein ADP-ribosylarginine] hydrolase	ADPRH_RAT	3	20.7535	1.20753
PD7 / VD7	Q8K1Q0	Q8K1Q0	0.185206	0.185206	0.251911	0.338288	60	Q8K1Q0	Nmt1	Glycylpeptide N-tetradecanoyltransferase 1	NMT1_RAT	12	13.6979	1.13698
PD7 / VD7	Q920P6	Q920P6	-0.199179	0.199179	0.252549	0.338655	8	Q920P6	Ada	Adenosine deaminase	ADA_RAT	2	-12.8954	0.871046
PD7 / VD7	A0A0G2K5T9;E9PTF9	A0A0G2K5T9;E9PTF9	-0.107075	0.107075	0.252618	0.338655	16	A0A0G2K5T9;E9PTF9	Wasf2	WASP family member 2	A0A0G2K5T9_RAT;E9PTF9_RAT	4	-7.15314	0.928469
PD7 / VD7	Q6P791	Q6P791	-0.201326	0.201326	0.25274	0.338655	8	Q6P791	Lamtor1	Ragulator complex protein LAMTOR1	LTOR1_RAT	2	-13.0249	0.869751
PD7 / VD7	B5DEJ5	B5DEJ5	-0.298349	0.298349	0.252359	0.338655	12	B5DEJ5	Eefsec	Eefsec protein	B5DEJ5_RAT	3	-18.6818	0.813182
PD7 / VD7	G3V9P0;Q9WTV5	G3V9P0;Q9WTV5	0.0557144	0.0557144	0.253186	0.338891	28	G3V9P0;Q9WTV5	Psmd9	26S proteasome non-ATPase regulatory subunit 9	G3V9P0_RAT;PSMD9_RAT	6	3.93736	1.03937
PD7 / VD7	A0A0H2UHJ5	A0A0H2UHJ5	-0.663821	0.663821	0.253195	0.338891	12	A0A0H2UHJ5	Zfr	Zinc finger RNA-binding protein	A0A0H2UHJ5_RAT	3	-36.8795	0.631205
PD7 / VD7	G3V6B8	G3V6B8	NaN	NaN	0.271297	0.350991	8	G3V6B8	Tsr2	RCG38965, isoform CRA_a	G3V6B8_RAT	1	NaN	NaN
PD7 / VD7	Q6P4Z9	Q6P4Z9	-0.476363	0.476363	0.25335	0.338913	12	Q6P4Z9	Cops8	COP9 signalosome complex subunit 8	CSN8_RAT	3	-28.1213	0.718787
PD7 / VD7	O70352;Q6IN14	O70352;Q6IN14	NaN	NaN	0.271438	0.350991	4	O70352;Q6IN14	Cd82	CD82 antigen;Tetraspanin	CD82_RAT;Q6IN14_RAT	1	NaN	NaN
PD7 / VD7	F1LV07	F1LV07	NaN	NaN	0.270987	0.350991	4	F1LV07	Dnah9	Dynein, axonemal, heavy chain 9	F1LV07_RAT	1	NaN	NaN
PD7 / VD7	P51156	P51156	-0.245452	0.245452	0.25353	0.338968	8	P51156	Rab26	Ras-related protein Rab-26	RAB26_RAT	2	-15.6449	0.843551
PD7 / VD7	G3V7G8	G3V7G8	0.157837	0.157837	0.254009	0.339422	92	G3V7G8	Gars	Glycine--tRNA ligase	G3V7G8_RAT	21	11.5613	1.11561
PD7 / VD7	D4A772	D4A772	NaN	NaN	0.272205	0.3514	4	D4A772	Dtna	Dystrobrevin	D4A772_RAT	1	NaN	NaN
PD7 / VD7	A0A0G2JSM7;Q63028	A0A0G2JSM7;Q63028	0.0287248	0.0287248	0.254665	0.339956	119	A0A0G2JSM7;Q63028	Add1	Adducin 1 (Alpha), isoform CRA_b;Alpha-adducin	A0A0G2JSM7_RAT;ADDA_RAT	24	2.011	1.02011
PD7 / VD7	P85968	P85968	0.189151	0.189151	0.254688	0.339956	108	P85968	Pgd	6-phosphogluconate dehydrogenase, decarboxylating	6PGD_RAT	21	14.0092	1.14009
PD7 / VD7	P31044	P31044	0.103346	0.103346	0.255102	0.340323	72	P31044	Pebp1	Phosphatidylethanolamine-binding protein 1	PEBP1_RAT	11	7.42622	1.07426
PD7 / VD7	A0A0G2KB55;P63281	A0A0G2KB55;P63281	-0.344806	0.344806	0.256362	0.341816	8	A0A0G2KB55;P63281	LOC102553386;Ube2i	SUMO-conjugating enzyme UBC9-like;SUMO-conjugating enzyme UBC9	A0A0G2KB55_RAT;UBC9_RAT	2	-21.2586	0.787414
PD7 / VD7	Q66HF3;Q6UPE1	Q66HF3;Q6UPE1	0.288111	0.288111	0.257675	0.342923	56	Q66HF3;Q6UPE1	Etfdh	Electron transfer flavoprotein-ubiquinone oxidoreductase, mitochondrial;Electron transfer flavoprotein-ubiquinone oxidoreductase, mitochondrial	Q66HF3_RAT;ETFD_RAT	12	22.104	1.22104
PD7 / VD7	Q9EQX9	Q9EQX9	-0.0587124	0.0587124	0.257565	0.342923	36	Q9EQX9	Ube2n	Ubiquitin-conjugating enzyme E2 N	UBE2N_RAT	7	-3.98794	0.960121
PD7 / VD7	Q9ERL1	Q9ERL1	NaN	NaN	0.272795	0.351492	4	Q9ERL1	Cybb	Cytochrome b-245 beta chain	Q9ERL1_RAT	1	NaN	NaN
PD7 / VD7	P97612	P97612	NaN	NaN	0.273624	0.351741	4	P97612	Faah	Fatty-acid amide hydrolase 1	FAAH1_RAT	1	NaN	NaN
PD7 / VD7	Q5D023;Q62698	Q5D023;Q62698	-0.0226611	0.0226611	0.257688	0.342923	88	Q5D023;Q62698	Dync1li2	Cytoplasmic dynein 1 light intermediate chain 2	Q5D023_RAT;DC1L2_RAT	14	-1.55848	0.984415
PD7 / VD7	Q6Q7Y5	Q6Q7Y5	0.106703	0.106703	0.257755	0.342923	28	Q6Q7Y5	Gna13	Guanine nucleotide-binding protein subunit alpha-13	GNA13_RAT	6	7.67647	1.07676
PD7 / VD7	G3V6W6	G3V6W6	0.157196	0.157196	0.258103	0.343105	72	G3V6W6	Psmc6	Proteasome 26S subunit, ATPase 6	G3V6W6_RAT	15	11.5117	1.11512
PD7 / VD7	D3ZLC1	D3ZLC1	0.138034	0.138034	0.258174	0.343105	44	D3ZLC1	Lmnb2	Lamin B2	D3ZLC1_RAT	10	10.0405	1.1004
PD7 / VD7	Q499S9	Q499S9	0.530731	0.530731	0.258334	0.34313	8	Q499S9	Rhbdf1	Inactive rhomboid protein 1	RHDF1_RAT	2	44.4661	1.44466
PD7 / VD7	D3ZUZ9;D4A5R0	D3ZUZ9;D4A5R0	NaN	NaN	0.275029	0.352579	4	D3ZUZ9;D4A5R0	Ppih	Peptidyl-prolyl cis-trans isomerase	D3ZUZ9_RAT;D4A5R0_RAT	1	NaN	NaN
PD7 / VD7	P39951	P39951	NaN	NaN	0.27581	0.353245	8	P39951	Cdk1	Cyclin-dependent kinase 1	CDK1_RAT	1	NaN	NaN
PD7 / VD7	Q5RJY4	Q5RJY4	-0.163078	0.163078	0.258535	0.343211	12	Q5RJY4	Dhrs7b	Dehydrogenase/reductase SDR family member 7B	DRS7B_RAT	3	-10.6883	0.893117
PD7 / VD7	P84100	P84100	0.317741	0.317741	0.259148	0.343778	32	P84100	Rpl19	60S ribosomal protein L19	RL19_RAT	4	24.6377	1.24638
PD7 / VD7	Q7TPJ7	Q7TPJ7	NaN	NaN	0.276956	0.354154	4	Q7TPJ7	RGD1359290	Ac2-210	Q7TPJ7_RAT	1	NaN	NaN
PD7 / VD7	A0A0G2KAI8	A0A0G2KAI8	0.0219277	0.0219277	0.25933	0.343778	24	A0A0G2KAI8	Drg2	Developmentally-regulated GTP-binding protein 2	A0A0G2KAI8_RAT	5	1.53153	1.01532
PD7 / VD7	D4A4W6	D4A4W6	-0.328605	0.328605	0.259975	0.343811	16	D4A4W6	Slirp	RCG20695, isoform CRA_b	D4A4W6_RAT	3	-20.3694	0.796306
PD7 / VD7	D3ZDK7	D3ZDK7	-0.0818491	0.0818491	0.259683	0.343811	24	D3ZDK7	Pgp	Glycerol-3-phosphate phosphatase	PGP_RAT	5	-5.51541	0.944846
PD7 / VD7	B0BNF6	B0BNF6	-0.514967	0.514967	0.2598	0.343811	8	B0BNF6	2020-03-05	Membrane-associated ring finger (C3HC4) 5	B0BNF6_RAT	2	-30.0191	0.699809
PD7 / VD7	G3V6Z7	G3V6Z7	0.0568792	0.0568792	0.259876	0.343811	44	G3V6Z7	Golga5	Golgi autoantigen, golgin subfamily a, 5, isoform CRA_a	G3V6Z7_RAT	9	4.02132	1.04021
PD7 / VD7	P62243	P62243	-0.0136623	0.0136623	0.26111	0.344786	52	P62243	Rps8	40S ribosomal protein S8	RS8_RAT	10	-0.942527	0.990575
PD7 / VD7	A0A0G2JZ09	A0A0G2JZ09	NaN	NaN	0.278209	0.35458	4	A0A0G2JZ09	Gstm6l	Glutathione S-transferase, mu 6-like	A0A0G2JZ09_RAT	1	NaN	NaN
PD7 / VD7	A0A0H2UHB7	A0A0H2UHB7	NaN	NaN	0.278272	0.35458	4	A0A0H2UHB7	Slc4a4	Anion exchange protein	A0A0H2UHB7_RAT	1	NaN	NaN
PD7 / VD7	Q5PQX1	Q5PQX1	-0.0746399	0.0746399	0.261137	0.344786	20	Q5PQX1	Tor1aip1	Torsin-1A-interacting protein 1	TOIP1_RAT	5	-5.04209	0.949579
PD7 / VD7	P45592	P45592	0.0105881	0.0105881	0.261404	0.344809	88	P45592	Cfl1	Cofilin-1	COF1_RAT	13	0.736613	1.00737
PD7 / VD7	A0A0G2JWR2;Q9Z0W5	A0A0G2JWR2;Q9Z0W5	0.215305	0.215305	0.261438	0.344809	52	A0A0G2JWR2;Q9Z0W5	Pacsin1	Protein kinase C and casein kinase substrate in neurons protein 1	A0A0G2JWR2_RAT;PACN1_RAT	13	16.0949	1.16095
PD7 / VD7	F1LT10;O35889	F1LT10;O35889	0.157343	0.157343	0.262154	0.345567	12	F1LT10;O35889	Afdn	Afadin	F1LT10_RAT;AFAD_RAT	3	11.5231	1.11523
PD7 / VD7	A0A0G2K872;Q1WIM3	A0A0G2K872;Q1WIM3	0.124248	0.124248	0.262563	0.345918	56	A0A0G2K872;Q1WIM3	Cadm3	Cell adhesion molecule 3	A0A0G2K872_RAT;CADM3_RAT	9	8.99393	1.08994
PD7 / VD7	G3V7Q6	G3V7Q6	0.0583715	0.0583715	0.262725	0.345944	56	G3V7Q6	Psmb5	Proteasome subunit beta	G3V7Q6_RAT	9	4.12897	1.04129
PD7 / VD7	A0A0G2K6F5;Q6AYE0	A0A0G2K6F5;Q6AYE0	NaN	NaN	0.280968	0.356345	4	A0A0G2K6F5;Q6AYE0	Tmbim1	Transmembrane BAX inhibitor motif-containing 1 (Fragment);Transmembrane BAX inhibitor motif containing 1, isoform CRA_a	A0A0G2K6F5_RAT;Q6AYE0_RAT	1	NaN	NaN
PD7 / VD7	B0BNM0	B0BNM0	NaN	NaN	0.280779	0.356345	4	B0BNM0	Tmem222	Tmem222 protein	B0BNM0_RAT	1	NaN	NaN
PD7 / VD7	P54311	P54311	-0.0710514	0.0710514	0.263491	0.346238	32	P54311	Gnb1	Guanine nucleotide-binding protein G(I)/G(S)/G(T) subunit beta-1	GBB1_RAT	6	-4.8056	0.951944
PD7 / VD7	B5DEQ4	B5DEQ4	NaN	NaN	0.281455	0.356605	4	B5DEQ4	Snrpb2	RCG27500, isoform CRA_c	B5DEQ4_RAT	1	NaN	NaN
PD7 / VD7	D3ZPW6	D3ZPW6	NaN	NaN	0.281653	0.356605	4	D3ZPW6	Lage3	L antigen family, member 3	D3ZPW6_RAT	1	NaN	NaN
PD7 / VD7	Q6AYS6	Q6AYS6	-0.348716	0.348716	0.263293	0.346238	8	Q6AYS6	Snx17	Sorting nexin-17	SNX17_RAT	2	-21.4717	0.785283
PD7 / VD7	A0A0G2K5D2;A0A0G2K9L1;D3ZBB2;D4ADL1;M0RAZ1	A0A0G2K5D2;A0A0G2K9L1;D3ZBB2;D4ADL1;M0RAZ1	NaN	NaN	0.281991	0.356662	4	A0A0G2K5D2;A0A0G2K9L1;D3ZBB2;D4ADL1;M0RAZ1	NaN	Uncharacterized protein	A0A0G2K5D2_RAT;A0A0G2K9L1_RAT;D3ZBB2_RAT;D4ADL1_RAT;M0RAZ1_RAT	1	NaN	NaN
PD7 / VD7	A0A0G2K6E2;F1M6X5;Q9Z0J5	A0A0G2K6E2;F1M6X5;Q9Z0J5	0.169524	0.169524	0.264024	0.346531	8	A0A0G2K6E2;F1M6X5;Q9Z0J5	Txnrd2	Thioredoxin reductase 2, isoform CRA_a;Thioredoxin reductase 2, mitochondrial;Thioredoxin reductase 2, mitochondrial	A0A0G2K6E2_RAT;F1M6X5_RAT;TRXR2_RAT	2	12.4688	1.12469
PD7 / VD7	Q5BJX0	Q5BJX0	-0.0895093	0.0895093	0.264533	0.347012	8	Q5BJX0	Ntmt1	N-terminal Xaa-Pro-Lys N-methyltransferase 1	NTM1A_RAT	2	-6.01577	0.939842
PD7 / VD7	A0A0G2K3G0;A0A0G2K9Y5;Q99PS8	A0A0G2K3G0;A0A0G2K9Y5;Q99PS8	0.131539	0.131539	0.264879	0.347201	48	A0A0G2K3G0;A0A0G2K9Y5;Q99PS8	Hrg	Histidine-rich glycoprotein	A0A0G2K3G0_RAT;A0A0G2K9Y5_RAT;HRG_RAT	10	9.54614	1.09546
PD7 / VD7	Q5XI90	Q5XI90	-0.0580817	0.0580817	0.264962	0.347201	12	Q5XI90	Dynlt3	Dynein light chain Tctex-type 3	Q5XI90_RAT	3	-3.94595	0.96054
PD7 / VD7	F7FHF3	F7FHF3	0.60052	0.60052	0.265578	0.347635	36	F7FHF3	Serpinf2	Serpin family F member 2	F7FHF3_RAT	6	51.6263	1.51626
PD7 / VD7	D4A4U3	D4A4U3	0.0553597	0.0553597	0.265574	0.347635	12	D4A4U3	Mdp1	Magnesium-dependent phosphatase 1	D4A4U3_RAT	3	3.91182	1.03912
PD7 / VD7	M0R608	M0R608	NaN	NaN	0.284493	0.358558	4	M0R608	Rtn1	Reticulon	M0R608_RAT	1	NaN	NaN
PD7 / VD7	D3ZCD7;D3ZL21	D3ZCD7;D3ZL21	NaN	NaN	0.284828	0.35876	4	D3ZCD7;D3ZL21	Tp53rk;LOC685619	RCG32142, isoform CRA_b;Similar to TP53-regulating kinase (p53-related protein kinase) (Nori-2)	D3ZCD7_RAT;D3ZL21_RAT	1	NaN	NaN
PD7 / VD7	F1MA98	F1MA98	-0.09567	0.09567	0.266246	0.347948	60	F1MA98	Tpr	Nucleoprotein TPR	TPR_RAT	15	-6.41624	0.935838
PD7 / VD7	P10688	P10688	0.125449	0.125449	0.266645	0.348282	48	P10688	Plcd1	1-phosphatidylinositol 4,5-bisphosphate phosphodiesterase delta-1	PLCD1_RAT	10	9.08475	1.09085
PD7 / VD7	Q4V898	Q4V898	NaN	NaN	0.286504	0.360178	4	Q4V898	Rbmx	RNA-binding motif protein, X chromosome	RBMX_RAT	1	NaN	NaN
PD7 / VD7	Q6AZ33	Q6AZ33	NaN	NaN	0.286546	0.360178	4	Q6AZ33	Blvra	Biliverdin reductase A	Q6AZ33_RAT	1	NaN	NaN
PD7 / VD7	F1LPK1;P40190	F1LPK1;P40190	-0.530928	0.530928	0.267433	0.349125	8	F1LPK1;P40190	Il6st	Interleukin-6 receptor subunit beta	F1LPK1_RAT;IL6RB_RAT	2	-30.789	0.69211
PD7 / VD7	A0A0G2K9C5;A1L1I3	A0A0G2K9C5;A1L1I3	-0.0185576	0.0185576	0.268839	0.349835	12	A0A0G2K9C5;A1L1I3	Numbl	Numb-like protein	A0A0G2K9C5_RAT;NUMBL_RAT	3	-1.27808	0.987219
PD7 / VD7	A0A096MJW2;A0A0H2UHL1;Q66H50	A0A096MJW2;A0A0H2UHL1;Q66H50	-0.128467	0.128467	0.268803	0.349835	16	A0A096MJW2;A0A0H2UHL1;Q66H50	Far1	Fatty acyl-CoA reductase;Fatty acyl-CoA reductase;Fatty acyl-CoA reductase 1	A0A096MJW2_RAT;A0A0H2UHL1_RAT;FACR1_RAT	4	-8.51972	0.914803
PD7 / VD7	B0K017	B0K017	NaN	NaN	0.288071	0.361349	4	B0K017	Adprhl2	ADP-ribosylhydrolase like 2 (Predicted)	B0K017_RAT	1	NaN	NaN
PD7 / VD7	A0A0G2JV57;A0A0U1RRY3;A0A0U1RRZ2;Q64270	A0A0G2JV57;A0A0U1RRY3;A0A0U1RRZ2;Q64270	0.455801	0.455801	0.268608	0.349835	8	A0A0G2JV57;A0A0U1RRY3;A0A0U1RRZ2;Q64270	Eif2b1	Translation initiation factor eIF-2B subunit alpha	A0A0G2JV57_RAT;A0A0U1RRY3_RAT;A0A0U1RRZ2_RAT;EI2BA_RAT	2	37.1544	1.37154
PD7 / VD7	A0A0G2JYU2;Q5XIE3	A0A0G2JYU2;Q5XIE3	-0.266922	0.266922	0.268419	0.349835	8	A0A0G2JYU2;Q5XIE3	mrpl11;Mrpl11	Mitochondrial ribosomal protein L11;39S ribosomal protein L11, mitochondrial	A0A0G2JYU2_RAT;RM11_RAT	2	-16.8909	0.831091
PD7 / VD7	A0A0G2JUU5;A7M746	A0A0G2JUU5;A7M746	0.850422	0.850422	0.268813	0.349835	12	A0A0G2JUU5;A7M746	Krt83	Keratin 83	A0A0G2JUU5_RAT;A7M746_RAT	3	80.3028	1.80303
PD7 / VD7	G3V6I1;Q8K4K5	G3V6I1;Q8K4K5	-1.37733	1.37733	0.269081	0.349963	8	G3V6I1;Q8K4K5	Llgl1	Lethal(2) giant larvae protein homolog 1	G3V6I1_RAT;L2GL1_RAT	2	-61.507	0.38493
PD7 / VD7	Q642E5	Q642E5	-0.0563242	0.0563242	0.269296	0.350056	32	Q642E5	Mvd	Diphosphomevalonate decarboxylase	Q642E5_RAT	8	-3.82887	0.961711
PD7 / VD7	Q9JI04	Q9JI04	-0.40201	0.40201	0.269446	0.350064	8	Q9JI04	Col5a3	Alpha 4 type V collagen	Q9JI04_RAT	2	-24.3197	0.756803
PD7 / VD7	D4A068	D4A068	0.119983	0.119983	0.269661	0.350156	24	D4A068	Pnma2	PNMA family member 2	D4A068_RAT	5	8.67223	1.08672
PD7 / VD7	Q5U355;Q8R4E1	Q5U355;Q8R4E1	0.449997	0.449997	0.270246	0.350729	8	Q5U355;Q8R4E1	Itfg1	Itfg1 protein;T-cell immunomodulatory protein	Q5U355_RAT;TIP_RAT	2	36.6037	1.36604
PD7 / VD7	F1M6Q3	F1M6Q3	0.150909	0.150909	0.270479	0.350846	64	F1M6Q3	Col4a2	Collagen type IV alpha 2 chain	F1M6Q3_RAT	9	11.0269	1.11027
PD7 / VD7	A0A0G2JW85;Q9QYJ2	A0A0G2JW85;Q9QYJ2	0.0175497	0.0175497	0.270733	0.350988	20	A0A0G2JW85;Q9QYJ2	Rasa3	Ras GTPase-activating protein 3	A0A0G2JW85_RAT;RASA3_RAT	5	1.22388	1.01224
PD7 / VD7	B2GUY4;D4A559	B2GUY4;D4A559	0.418635	0.418635	0.271241	0.350991	24	B2GUY4;D4A559	Dmtn	Dematin actin-binding protein	B2GUY4_RAT;D4A559_RAT	6	33.6662	1.33666
PD7 / VD7	D3ZHZ3	D3ZHZ3	-0.519493	0.519493	0.271456	0.350991	32	D3ZHZ3	Osbpl3	Oxysterol-binding protein	D3ZHZ3_RAT	8	-30.2383	0.697617
PD7 / VD7	D4ACG2	D4ACG2	0.0767434	0.0767434	0.27165	0.351055	36	D4ACG2	Ilvbl	IlvB (Bacterial acetolactate synthase)-like (Predicted), isoform CRA_c	D4ACG2_RAT	8	5.46348	1.05463
PD7 / VD7	Q9Z336	Q9Z336	0.418766	0.418766	0.272128	0.3514	16	Q9Z336	Dynlt1	Dynein light chain Tctex-type 1	DYLT1_RAT	2	33.6783	1.33678
PD7 / VD7	F7EPH4	F7EPH4	0.128153	0.128153	0.272625	0.351492	68	F7EPH4	Ppa1	Pyrophosphatase (inorganic) 1	F7EPH4_RAT	13	9.28934	1.09289
PD7 / VD7	Q499Q4	Q499Q4	0.203096	0.203096	0.272636	0.351492	88	Q499Q4	Pgm1	Phosphoglucomutase-1	Q499Q4_RAT	18	15.1166	1.15117
PD7 / VD7	O08816	O08816	-0.0848969	0.0848969	0.273185	0.351492	24	O08816	Wasl	Neural Wiskott-Aldrich syndrome protein	WASL_RAT	6	-5.71481	0.942852
PD7 / VD7	Q80W89	Q80W89	0.0636251	0.0636251	0.273042	0.351492	24	Q80W89	Ndufa11	NADH dehydrogenase [ubiquinone] 1 alpha subcomplex subunit 11	NDUAB_RAT	4	4.50885	1.04509
PD7 / VD7	D4A4J0	D4A4J0	0.516768	0.516768	0.273091	0.351492	16	D4A4J0	Supt16h	SPT16 homolog, facilitates chromatin-remodeling subunit	D4A4J0_RAT	4	43.0747	1.43075
PD7 / VD7	A0A0G2KAT3	A0A0G2KAT3	-0.275562	0.275562	0.273286	0.351492	12	A0A0G2KAT3	Rpa1	Replication protein A subunit	A0A0G2KAT3_RAT	3	-17.3872	0.826128
PD7 / VD7	A0A0G2K261	A0A0G2K261	0.0674038	0.0674038	0.273777	0.351752	84	A0A0G2K261	Iars2	Isoleucyl-tRNA synthetase 2, mitochondrial	A0A0G2K261_RAT	18	4.78294	1.04783
PD7 / VD7	G3V9J1	G3V9J1	NaN	NaN	0.291384	0.363038	4	G3V9J1	NaN	Uncharacterized protein	G3V9J1_RAT	1	NaN	NaN
PD7 / VD7	A0A0H2UHL9	A0A0H2UHL9	0.225524	0.225524	0.274461	0.352382	96	A0A0H2UHL9	Dbn1	Drebrin	A0A0H2UHL9_RAT	19	16.9202	1.1692
PD7 / VD7	P22734	P22734	-0.0811418	0.0811418	0.274702	0.352382	52	P22734	Comt	Catechol O-methyltransferase	COMT_RAT	11	-5.46908	0.945309
PD7 / VD7	Q5XI31	Q5XI31	-0.154697	0.154697	0.274645	0.352382	28	Q5XI31	Pigs	GPI transamidase component PIG-S	PIGS_RAT	6	-10.1679	0.898321
PD7 / VD7	D4A206	D4A206	0.413486	0.413486	0.275145	0.352579	20	D4A206	Tcof1	Treacle ribosome biogenesis factor 1	D4A206_RAT	5	33.19	1.3319
PD7 / VD7	P14942	P14942	-0.0368811	0.0368811	0.276515	0.353962	72	P14942	Gsta4	Glutathione S-transferase alpha-4	GSTA4_RAT	11	-2.524	0.97476
PD7 / VD7	D4AE00	D4AE00	0.0850527	0.0850527	0.27689	0.354154	96	D4AE00	Ap3b2	AP-3 complex subunit beta	D4AE00_RAT	22	6.07265	1.06073
PD7 / VD7	O35567	O35567	0.239959	0.239959	0.277283	0.354387	140	O35567	Atic	Bifunctional purine biosynthesis protein PURH	PUR9_RAT	26	18.0959	1.18096
PD7 / VD7	Q1HAQ0	Q1HAQ0	NaN	NaN	0.294337	0.36307	4	Q1HAQ0	Lpcat1	Lysophosphatidylcholine acyltransferase 1	PCAT1_RAT	1	NaN	NaN
PD7 / VD7	D3ZTV6	D3ZTV6	-0.28176	0.28176	0.277658	0.354494	12	D3ZTV6	Sfrp5	Secreted frizzled-related protein 5	D3ZTV6_RAT	3	-17.7413	0.822587
PD7 / VD7	B2RYI0	B2RYI0	0.0450778	0.0450778	0.277592	0.354494	8	B2RYI0	Wdr91	WD repeat-containing protein 91	WDR91_RAT	2	3.17388	1.03174
PD7 / VD7	Q4AEF8	Q4AEF8	0.139061	0.139061	0.277918	0.35458	88	Q4AEF8	Copg1	Coatomer subunit gamma-1	COPG1_RAT	17	10.1188	1.10119
PD7 / VD7	P05545	P05545	-0.0260917	0.0260917	0.278453	0.35458	72	P05545	Serpina3k	Serine protease inhibitor A3K	SPA3K_RAT	12	-1.79229	0.982077
PD7 / VD7	Q4KM57	Q4KM57	NaN	NaN	0.295778	0.364448	4	Q4KM57	Lemd2	LEM domain containing 2	Q4KM57_RAT	1	NaN	NaN
PD7 / VD7	A0A0G2KB26;Q5XI43	A0A0G2KB26;Q5XI43	0.137741	0.137741	0.278389	0.35458	12	A0A0G2KB26;Q5XI43	Mxra8	Limitrin, isoform CRA_b;Matrix remodeling-associated protein 8	A0A0G2KB26_RAT;MXRA8_RAT	3	10.0181	1.10018
PD7 / VD7	G3V7B6;P0C089	G3V7B6;P0C089	0.0984235	0.0984235	0.279033	0.355132	8	G3V7B6;P0C089	Ptpmt1	Phosphatidylglycerophosphatase and protein-tyrosine phosphatase 1	G3V7B6_RAT;PTPM1_RAT	2	7.0603	1.0706
PD7 / VD7	A0A0G2JYA4;P63331	A0A0G2JYA4;P63331	NaN	NaN	0.296302	0.364575	4	A0A0G2JYA4;P63331	LOC100362453;Ppp2ca	Serine/threonine-protein phosphatase;Serine/threonine-protein phosphatase 2A catalytic subunit alpha isoform	A0A0G2JYA4_RAT;PP2AA_RAT	1	NaN	NaN
PD7 / VD7	Q5M9H4	Q5M9H4	-0.0797212	0.0797212	0.279462	0.355493	40	Q5M9H4	Atp1b2	Sodium/potassium-transporting ATPase subunit beta	Q5M9H4_RAT	7	-5.37595	0.94624
PD7 / VD7	Q5XIC0	Q5XIC0	0.0144665	0.0144665	0.27986	0.355742	48	Q5XIC0	Eci2	Enoyl-CoA delta isomerase 2, mitochondrial	ECI2_RAT	9	1.00779	1.01008
PD7 / VD7	A0A0G2K7X7	A0A0G2K7X7	-0.366947	0.366947	0.27995	0.355742	12	A0A0G2K7X7	C7	Complement C7	A0A0G2K7X7_RAT	3	-22.4578	0.775422
PD7 / VD7	Q6AYN2	Q6AYN2	NaN	NaN	0.296823	0.364583	4	Q6AYN2	Saraf	Store-operated calcium entry-associated regulatory factor	SARAF_RAT	1	NaN	NaN
PD7 / VD7	Q5RK00	Q5RK00	NaN	NaN	0.297085	0.364583	4	Q5RK00	Mrpl46	39S ribosomal protein L46, mitochondrial	RM46_RAT	1	NaN	NaN
PD7 / VD7	F1LSC3	F1LSC3	-0.0995158	0.0995158	0.280342	0.356055	32	F1LSC3	Sf1	Splicing factor 1	F1LSC3_RAT	7	-6.66538	0.933346
PD7 / VD7	P60825	P60825	-0.309148	0.309148	0.281009	0.356345	16	P60825	Cirbp	Cold-inducible RNA-binding protein	CIRBP_RAT	3	-19.2882	0.807118
PD7 / VD7	D3ZL85	D3ZL85	NaN	NaN	0.29768	0.364935	4	D3ZL85	Hccs	Cytochrome c heme lyase	D3ZL85_RAT	1	NaN	NaN
PD7 / VD7	P29418	P29418	NaN	NaN	0.298632	0.365745	4	P29418	Atp5f1e	ATP synthase subunit epsilon, mitochondrial	ATP5E_RAT	1	NaN	NaN
PD7 / VD7	Q4KLL0	Q4KLL0	-0.134653	0.134653	0.281543	0.356605	40	Q4KLL0	Tcea1	Transcription elongation factor A protein 1	TCEA1_RAT	9	-8.91109	0.910889
PD7 / VD7	D3ZD05;D4ACC2	D3ZD05;D4ACC2	0.199097	0.199097	0.281974	0.356662	40	D3ZD05;D4ACC2	Kank2	KN motif and ankyrin repeat domain-containing protein 2	KANK2_RAT;D4ACC2_RAT	10	14.798	1.14798
PD7 / VD7	A0A0G2JZT5;D4A0F5;F1LMC7;Q9WVC0	A0A0G2JZT5;D4A0F5;F1LMC7;Q9WVC0	0.147749	0.147749	0.282797	0.357496	104	A0A0G2JZT5;D4A0F5;F1LMC7;Q9WVC0	2020-09-07	Septin-7	A0A0G2JZT5_RAT;D4A0F5_RAT;F1LMC7_RAT;SEPT7_RAT	19	10.784	1.10784
PD7 / VD7	Q5XIK2	Q5XIK2	-0.0173956	0.0173956	0.282988	0.357551	32	Q5XIK2	Tmx2	Thioredoxin-related transmembrane protein 2	TMX2_RAT	6	-1.19853	0.988015
PD7 / VD7	E9PU13	E9PU13	0.141421	0.141421	0.283313	0.357777	16	E9PU13	Snx4	Sorting nexin 4	E9PU13_RAT	4	10.2991	1.10299
PD7 / VD7	P25093	P25093	0.257683	0.257683	0.284159	0.358558	16	P25093	Fah	Fumarylacetoacetase	FAAA_RAT	4	19.5557	1.19556
PD7 / VD7	A0A0G2K4H3;A0A0H2UHV6;P63100	A0A0G2K4H3;A0A0H2UHV6;P63100	0.039363	0.039363	0.284303	0.358558	24	A0A0G2K4H3;A0A0H2UHV6;P63100	;Ppp3r1;Ppp3r1	Uncharacterized protein (Fragment);Calcineurin subunit B type 1;Calcineurin subunit B type 1	A0A0G2K4H3_RAT;A0A0H2UHV6_RAT;CANB1_RAT	5	2.766	1.02766
PD7 / VD7	G3V6M3;P29101	G3V6M3;P29101	-0.241072	0.241072	0.284521	0.358558	12	G3V6M3;P29101	Syt2	Synaptotagmin II;Synaptotagmin-2	G3V6M3_RAT;SYT2_RAT	2	-15.3883	0.846117
PD7 / VD7	A0JPQ5;M0R635;Q4V8K3	A0JPQ5;M0R635;Q4V8K3	0.129493	0.129493	0.286208	0.360125	20	A0JPQ5;M0R635;Q4V8K3	RGD1560212;LOC100909833;Naa11	Similar to DNA segment, Chr 18, Wayne State University 98, expressed (Predicted), isoform CRA_c;N-alpha-acetyltransferase 11-like;N-alpha-acetyltransferase 11	A0JPQ5_RAT;M0R635_RAT;NAA11_RAT	4	9.39096	1.09391
PD7 / VD7	G3V8V4;Q3T1K1	G3V8V4;Q3T1K1	NaN	NaN	0.300278	0.366105	4	G3V8V4;Q3T1K1	Cers2	Ceramide synthase 2	G3V8V4_RAT;Q3T1K1_RAT	1	NaN	NaN
PD7 / VD7	B5DFI3	B5DFI3	-0.0660204	0.0660204	0.286151	0.360125	12	B5DFI3	Ap1s1	AP complex subunit sigma	B5DFI3_RAT	3	-4.47306	0.955269
PD7 / VD7	Q6P6V0	Q6P6V0	0.138716	0.138716	0.286836	0.360358	128	Q6P6V0	Gpi	Glucose-6-phosphate isomerase	G6PI_RAT	18	10.0925	1.10092
PD7 / VD7	P0C5X8	P0C5X8	NaN	NaN	0.30143	0.366776	4	P0C5X8	Ttyh1	Protein tweety homolog 1	TTYH1_RAT	1	NaN	NaN
PD7 / VD7	P10959	P10959	0.0978142	0.0978142	0.287066	0.360445	76	P10959	Ces1c	Carboxylesterase 1C	EST1C_RAT	18	7.01509	1.07015
PD7 / VD7	Q5PPM8	Q5PPM8	-0.260561	0.260561	0.287202	0.360445	8	Q5PPM8	Pip4p1	Type 1 phosphatidylinositol 4,5-bisphosphate 4-phosphatase	PP4P1_RAT	2	-16.5237	0.834763
PD7 / VD7	Q6AY20	Q6AY20	0.06229	0.06229	0.288387	0.36156	32	Q6AY20	M6pr	Cation-dependent mannose-6-phosphate receptor	MPRD_RAT	5	4.41218	1.04412
PD7 / VD7	F1LR52;F1M3J4	F1LR52;F1M3J4	NaN	NaN	0.303198	0.36764	4	F1LR52;F1M3J4	Abcc4	ATP-binding cassette subfamily C member 4	F1LR52_RAT;F1M3J4_RAT	1	NaN	NaN
PD7 / VD7	Q5FWY5	Q5FWY5	0.111822	0.111822	0.288747	0.361706	44	Q5FWY5	Aip	AH receptor-interacting protein	AIP_RAT	8	8.05919	1.08059
PD7 / VD7	P97546	P97546	0.0549599	0.0549599	0.288801	0.361706	16	P97546	Nptn	Neuroplastin	NPTN_RAT	4	3.88302	1.03883
PD7 / VD7	A0A0G2JZ53;F1LY70	A0A0G2JZ53;F1LY70	0.00632388	0.00632388	0.289195	0.361828	20	A0A0G2JZ53;F1LY70	Birc6	Baculoviral IAP repeat-containing 6	A0A0G2JZ53_RAT;F1LY70_RAT	5	0.4393	1.00439
PD7 / VD7	Q56A27	Q56A27	-0.230881	0.230881	0.289143	0.361828	8	Q56A27	Ncbp1	Nuclear cap-binding protein subunit 1	NCBP1_RAT	2	-14.7886	0.852114
PD7 / VD7	P16884	P16884	0.120154	0.120154	0.289444	0.361954	200	P16884	Nefh	Neurofilament heavy polypeptide	NFH_RAT	25	8.68511	1.08685
PD7 / VD7	D4A304	D4A304	0.114119	0.114119	0.289818	0.362236	20	D4A304	Diras1	DIRAS family GTPase 1	D4A304_RAT	5	8.23135	1.08231
PD7 / VD7	D4A2D7	D4A2D7	0.812393	0.812393	0.290335	0.362695	20	D4A2D7	Ipo4	Importin 4	D4A2D7_RAT	5	75.6122	1.75612
PD7 / VD7	Q9QX80;Q9QX81	Q9QX80;Q9QX81	-0.0806638	0.0806638	0.290562	0.362793	48	Q9QX80;Q9QX81	Hnrnpab	CArG-binding factor A;Heterogeneous nuclear ribonucleoprotein A/B	Q9QX80_RAT;Q9QX81_RAT	8	-5.43775	0.945622
PD7 / VD7	D4A031	D4A031	-0.136297	0.136297	0.290751	0.362843	16	D4A031	Ddx42	DEAD (Asp-Glu-Ala-Asp) box polypeptide 42 (Predicted)	D4A031_RAT	4	-9.01483	0.909852
PD7 / VD7	Q4KM24	Q4KM24	NaN	NaN	0.304094	0.368436	4	Q4KM24	Pex11b	Peroxisomal biogenesis factor 11 beta	Q4KM24_RAT	1	NaN	NaN
PD7 / VD7	M0RA79	M0RA79	0.497964	0.497964	0.292696	0.363038	12	M0RA79	NaN	Uncharacterized protein	M0RA79_RAT	3	41.222	1.41222
PD7 / VD7	A0A0G2K6Q5;Q6MG06	A0A0G2K6Q5;Q6MG06	-0.144876	0.144876	0.292089	0.363038	28	A0A0G2K6Q5;Q6MG06	Gnl1	Guanine nucleotide-binding protein-like 1	A0A0G2K6Q5_RAT;GNL1_RAT	7	-9.5543	0.904457
PD7 / VD7	A0A0G2K109;A0A0G2K324;D3ZCM7;E9PTW9;F1LQJ5;F1M0E7;Q07141;Q9JIT3	A0A0G2K109;A0A0G2K324;D3ZCM7;E9PTW9;F1LQJ5;F1M0E7;Q07141;Q9JIT3	NaN	NaN	0.305579	0.36851	4	A0A0G2K109;A0A0G2K324;D3ZCM7;E9PTW9;F1LQJ5;F1M0E7;Q07141;Q9JIT3	Tle2;Tle1;Tle1;Tle2;Tle4;Tle4;Tle4;Tle3	TLE family member 2, transcriptional corepressor;TLE family member 1, transcriptional corepressor;TLE family member 1, transcriptional corepressor;TLE family member 2, transcriptional corepressor;RCG48308, isoform CRA_c;Transducin-like enhancer protein 4;Transducin-like enhancer protein 4;Transducin-like enhancer protein 3	A0A0G2K109_RAT;A0A0G2K324_RAT;D3ZCM7_RAT;E9PTW9_RAT;F1LQJ5_RAT;F1M0E7_RAT;TLE4_RAT;TLE3_RAT	1	NaN	NaN
PD7 / VD7	A0A0G2JVS7;Q5M7T1	A0A0G2JVS7;Q5M7T1	NaN	NaN	0.30557	0.36851	4	A0A0G2JVS7;Q5M7T1	Ciao1	Probable cytosolic iron-sulfur protein assembly protein CIAO1	A0A0G2JVS7_RAT;CIAO1_RAT	1	NaN	NaN
PD7 / VD7	Q68FS4	Q68FS4	0.0962959	0.0962959	0.292561	0.363038	107	Q68FS4	Lap3	Cytosol aminopeptidase	AMPL_RAT	20	6.90252	1.06903
PD7 / VD7	Q5M8C3	Q5M8C3	0.0481591	0.0481591	0.292531	0.363038	56	Q5M8C3	Serpina4	Serine (Or cysteine) proteinase inhibitor, clade A (Alpha-1 antiproteinase, antitrypsin), member 4	Q5M8C3_RAT	11	3.39448	1.03394
PD7 / VD7	D3ZCD4;P53812	D3ZCD4;P53812	0.0650339	0.0650339	0.292086	0.363038	12	D3ZCD4;P53812	Pitpnb	Phosphatidylinositol transfer protein beta isoform	D3ZCD4_RAT;PIPNB_RAT	3	4.61095	1.04611
PD7 / VD7	Q792H5;Z4YNP1	Q792H5;Z4YNP1	0.0463461	0.0463461	0.292503	0.363038	20	Q792H5;Z4YNP1	Celf2	CUGBP Elav-like family member 2	CELF2_RAT;Z4YNP1_RAT	4	3.26463	1.03265
PD7 / VD7	A0A096MJN8;D3ZQ46	A0A096MJN8;D3ZQ46	0.0918276	0.0918276	0.29111	0.363038	12	A0A096MJN8;D3ZQ46	Cmtm5	CKLF-like MARVEL transmembrane domain-containing 5	A0A096MJN8_RAT;D3ZQ46_RAT	2	6.57194	1.06572
PD7 / VD7	F1M7P4	F1M7P4	NaN	NaN	0.306158	0.368627	8	F1M7P4	Prph	Peripherin	F1M7P4_RAT	1	NaN	NaN
PD7 / VD7	D3ZM03	D3ZM03	NaN	NaN	0.306733	0.368627	4	D3ZM03	LOC100912478	Vacuolar ATPase assembly integral membrane protein VMA21	D3ZM03_RAT	1	NaN	NaN
PD7 / VD7	F1LMM8;Q64536	F1LMM8;Q64536	NaN	NaN	0.306886	0.368627	4	F1LMM8;Q64536	Pdk2	[Pyruvate dehydrogenase (acetyl-transferring)] kinase isozyme 2, mitochondrial;[Pyruvate dehydrogenase (acetyl-transferring)] kinase isozyme 2, mitochondrial	F1LMM8_RAT;PDK2_RAT	1	NaN	NaN
PD7 / VD7	G3V913	G3V913	0.254908	0.254908	0.291734	0.363038	76	G3V913	Hspb1	Heat shock 27kDa protein 1	G3V913_RAT	12	19.3259	1.19326
PD7 / VD7	P52287	P52287	NaN	NaN	0.307257	0.368853	4	P52287	Gnb3	Guanine nucleotide-binding protein G(I)/G(S)/G(T) subunit beta-3	GBB3_RAT	1	NaN	NaN
PD7 / VD7	P11507	P11507	0.277036	0.277036	0.292302	0.363038	132	P11507	Atp2a2	Sarcoplasmic/endoplasmic reticulum calcium ATPase 2	AT2A2_RAT	21	21.1703	1.2117
PD7 / VD7	P25286;Q2I6B2;Q2I6B5	P25286;Q2I6B2;Q2I6B5	-0.173755	0.173755	0.292335	0.363038	28	P25286;Q2I6B2;Q2I6B5	Atp6v0a1	V-type proton ATPase 116 kDa subunit a isoform 1;V-type proton ATPase subunit a;V-type proton ATPase subunit a	VPP1_RAT;Q2I6B2_RAT;Q2I6B5_RAT	7	-11.3468	0.886532
PD7 / VD7	D3ZG78	D3ZG78	NaN	NaN	0.308315	0.369449	4	D3ZG78	Zzef1	Zinc finger ZZ-type and EF-hand domain-containing 1	D3ZG78_RAT	1	NaN	NaN
PD7 / VD7	D3ZQ25	D3ZQ25	-0.059376	0.059376	0.29154	0.363038	12	D3ZQ25	Fbln1	Fibulin-1	D3ZQ25_RAT	3	-4.03209	0.959679
PD7 / VD7	A8QIC3	A8QIC3	NaN	NaN	0.30876	0.369602	4	A8QIC3	Dnajc9	DnaJ (Hsp40) homolog, subfamily C, member 9 (Predicted)	A8QIC3_RAT	1	NaN	NaN
PD7 / VD7	P10252	P10252	-0.293215	0.293215	0.294257	0.36307	60	P10252	Cd48	CD48 antigen	CD48_RAT	8	-18.3918	0.816082
PD7 / VD7	D4A9T5	D4A9T5	NaN	NaN	0.309301	0.369704	4	D4A9T5	Efhd1	EF-hand domain family, member D1	D4A9T5_RAT	1	NaN	NaN
PD7 / VD7	Q62896	Q62896	NaN	NaN	0.309168	0.369704	8	Q62896	Bet1	BET1 homolog	BET1_RAT	1	NaN	NaN
PD7 / VD7	G3V6U3	G3V6U3	0.12377	0.12377	0.293583	0.36307	88	G3V6U3	Alg2	ALG2, alpha-1,3/1,6-mannosyltransferase	G3V6U3_RAT	15	8.95783	1.08958
PD7 / VD7	D3ZRE7	D3ZRE7	0.100234	0.100234	0.294361	0.36307	44	D3ZRE7	Swap70	SWAP complex protein (Predicted), isoform CRA_b	D3ZRE7_RAT	10	7.19477	1.07195
PD7 / VD7	M0R9L2	M0R9L2	NaN	NaN	0.311843	0.372184	8	M0R9L2	Cntfr	Ciliary neurotrophic factor receptor subunit alpha	M0R9L2_RAT	1	NaN	NaN
PD7 / VD7	A0A0G2K4J4;A0A0G2K5I9;F1LRV0;P09414	A0A0G2K4J4;A0A0G2K5I9;F1LRV0;P09414	NaN	NaN	0.311987	0.372184	4	A0A0G2K4J4;A0A0G2K5I9;F1LRV0;P09414	Nfia	Nuclear factor 1;Nuclear factor 1;Nuclear factor 1;Nuclear factor 1 A-type	A0A0G2K4J4_RAT;A0A0G2K5I9_RAT;F1LRV0_RAT;NFIA_RAT	1	NaN	NaN
PD7 / VD7	A0A0G2QC17;A1L1J4;O88483	A0A0G2QC17;A1L1J4;O88483	NaN	NaN	0.312846	0.372297	4	A0A0G2QC17;A1L1J4;O88483	Pdp1	Protein phosphatase 2C, magnesium dependent, catalytic subunit, isoform CRA_a;Protein phosphatase 2C, magnesium dependent, catalytic subunit;[Pyruvate dehydrogenase [acetyl-transferring]]-phosphatase 1, mitochondrial	A0A0G2QC17_RAT;A1L1J4_RAT;PDP1_RAT	1	NaN	NaN
PD7 / VD7	D3Z865	D3Z865	NaN	NaN	0.31249	0.372297	4	D3Z865	Mpdu1	Mannose-P-dolichol utilization defect 1	D3Z865_RAT	1	NaN	NaN
PD7 / VD7	O55166	O55166	0.0406487	0.0406487	0.292976	0.36307	24	O55166	Vps52	Vacuolar protein sorting-associated protein 52 homolog	VPS52_RAT	6	2.85762	1.02858
PD7 / VD7	A0A0G2JW94	A0A0G2JW94	NaN	NaN	0.312727	0.372297	4	A0A0G2JW94	Clint1	Clathrin interactor 1	A0A0G2JW94_RAT	1	NaN	NaN
PD7 / VD7	D2XV59	D2XV59	NaN	NaN	0.312332	0.372297	4	D2XV59	Gtpbp1	GTP-binding protein 1	GTPB1_RAT	1	NaN	NaN
PD7 / VD7	P02696	P02696	0.0958829	0.0958829	0.293238	0.36307	32	P02696	Rbp1	Retinol-binding protein 1	RET1_RAT	8	6.87192	1.06872
[truncated: 1,847 more rows]

## Sheet: peak CIPN_dataset
Complete dataset of proteomics results at peak-CIPN. Only proteins identified with 2 or more unique peptides (column M) are considered.
Comparison (group1/group2)	Group	ProteinGroups	AVG Log2 Ratio	Absolute AVG Log2 Ratio	Pvalue	Qvalue	# of Ratios	UniProtIds	Genes	ProteinDescriptions	ProteinNames	# Unique Total Peptides	% Change	Ratio
PP / VP	F1LRV9	F1LRV9	0.739776	0.739776	5.56612e-49	1.79897e-45	428	F1LRV9	Myh1	Myosin-4	F1LRV9_RAT	75	66.9917	1.66992
PP / VP	A0A0G2K484;F1LMU0	A0A0G2K484;F1LMU0	2.22035	2.22035	2.10599e-23	3.40327e-20	216	A0A0G2K484;F1LMU0	Myh1;Myh4	Myosin-4	A0A0G2K484_RAT;F1LMU0_RAT	36	366.008	4.66008
PP / VP	Q8R4I6	Q8R4I6	0.499126	0.499126	4.16075e-09	4.48251e-06	68	Q8R4I6	Actn3	Actinin alpha 3	Q8R4I6_RAT	15	41.3357	1.41336
PP / VP	D4A678	D4A678	-0.156386	0.156386	9.24045e-06	0.00746628	568	D4A678	Spta1	Spectrin, alpha, erythrocytic 1	D4A678_RAT	101	-10.273	0.89727
PP / VP	Q64578	Q64578	0.357088	0.357088	1.96099e-05	0.0126759	96	Q64578	Atp2a1	Sarcoplasmic/endoplasmic reticulum calcium ATPase 1	AT2A1_RAT	18	28.0838	1.28084
PP / VP	A0A0G2K4V5;F1LSD3	A0A0G2K4V5;F1LSD3	-0.110068	0.110068	6.32992e-05	0.0270063	340	A0A0G2K4V5;F1LSD3	Itgb4	Integrin beta	A0A0G2K4V5_RAT;F1LSD3_RAT	57	-7.34556	0.926544
PP / VP	E9PTU4	E9PTU4	0.0330701	0.0330701	5.96959e-05	0.0270063	436	E9PTU4	Myh11	Myosin-11	E9PTU4_RAT	76	2.31872	1.02319
PP / VP	P12839	P12839	-0.121539	0.121539	7.9448e-05	0.0285307	288	P12839	Nefm	Neurofilament medium polypeptide	NFM_RAT	36	-8.07933	0.919207
PP / VP	P04466	P04466	2.37892	2.37892	0.000125975	0.0407152	56	P04466	Mylpf	Myosin regulatory light chain 2, skeletal muscle isoform	MLRS_RAT	10	420.148	5.20148
PP / VP	A0A140UHX6	A0A140UHX6	-0.106576	0.106576	0.000166372	0.048883	488	A0A140UHX6	Sptb	Spectrin beta chain	A0A140UHX6_RAT	87	-7.12104	0.92879
PP / VP	D3ZDT1	D3ZDT1	-0.204991	0.204991	0.000182232	0.0490811	248	D3ZDT1	Epb41l2	Erythrocyte membrane protein band 4.1-like 2	D3ZDT1_RAT	40	-13.2456	0.867544
PP / VP	B2GVB9	B2GVB9	0.50102	0.50102	7.86268e-05	0.0203858	28	B2GVB9	Fermt3	Fermitin family member 3	B2GVB9_RAT	7	41.5214	1.41521
PP / VP	Q6Q0N1	Q6Q0N1	0.0863812	0.0863812	6.7553e-05	0.0192661	84	Q6Q0N1	Cndp2	Cytosolic non-specific dipeptidase	CNDP2_RAT	18	6.17037	1.0617
PP / VP	P16086	P16086	-0.0808083	0.0808083	3.25145e-08	3.09104e-05	964	P16086	Sptan1	Spectrin alpha chain, non-erythrocytic 1	SPTN1_RAT	156	-5.44722	0.945528
PP / VP	A0A0G2JUA5	A0A0G2JUA5	-0.363455	0.363455	9.1805e-08	6.5457e-05	1031	A0A0G2JUA5	Ahnak	AHNAK nucleoprotein	A0A0G2JUA5_RAT	188	-22.2699	0.777301
PP / VP	D3ZA38	D3ZA38	0.939613	0.939613	0.000313546	0.0723844	40	D3ZA38	Mybpc2	Myosin binding protein C, fast-type (Predicted)	D3ZA38_RAT	11	91.8014	1.91801
PP / VP	G3V6P7	G3V6P7	0.0889035	0.0889035	0.00052666	0.073201	551	G3V6P7	Myh9	Myosin heavy chain 9-like 1	G3V6P7_RAT	84	6.35616	1.06356
PP / VP	Q63425	Q63425	-0.121454	0.121454	0.000471382	0.073201	589	Q63425	Prx	Periaxin	PRAX_RAT	73	-8.07391	0.919261
PP / VP	D3ZU13;D4AD15	D3ZU13;D4AD15	-0.0634064	0.0634064	0.000441423	0.073201	116	D3ZU13;D4AD15	Eif4g1	Eukaryotic translation initiation factor 4 gamma, 1;Eukaryotic translation initiation factor 4 gamma, 1	D3ZU13_RAT;D4AD15_RAT	24	-4.29981	0.957002
PP / VP	P62845	P62845	-0.400745	0.400745	0.000537986	0.073201	56	P62845	Rps15	40S ribosomal protein S15	RS15_RAT	5	-24.2533	0.757467
PP / VP	Q6AZ73	Q6AZ73	-0.230472	0.230472	0.000452202	0.073201	32	Q6AZ73	Plekhb1	Pleckstrin homology domain containing, family B (Evectins) member 1, isoform CRA_d	Q6AZ73_RAT	6	-14.7644	0.852356
PP / VP	D4A6A2	D4A6A2	-0.809533	0.809533	0.000402999	0.073201	20	D4A6A2	LOC100911361	Heterogeneous nuclear ribonucleoprotein A3-like	D4A6A2_RAT	2	-42.9434	0.570566
PP / VP	F1LQI1	F1LQI1	-0.11677	0.11677	0.000448678	0.073201	44	F1LQI1	Hagh	Hydroxyacyl glutathione hydrolase	F1LQI1_RAT	7	-7.77501	0.92225
PP / VP	Q5U1Z9	Q5U1Z9	-0.343103	0.343103	0.000543572	0.073201	24	Q5U1Z9	Mtx2	Metaxin 2	Q5U1Z9_RAT	4	-21.1656	0.788344
PP / VP	A0A0G2JZE4;F1M7H7;M0R8T1;Q4L1J4	A0A0G2JZE4;F1M7H7;M0R8T1;Q4L1J4	-0.268113	0.268113	0.000517897	0.073201	24	A0A0G2JZE4;F1M7H7;M0R8T1;Q4L1J4	Magi1	Membrane-associated guanylate kinase, WW and PDZ domain-containing protein 1;Membrane-associated guanylate kinase, WW and PDZ domain-containing protein 1;Membrane-associated guanylate kinase, WW and PDZ domain-containing protein 1;Membrane-associated guanylate kinase, WW and PDZ domain-containing protein 1	A0A0G2JZE4_RAT;F1M7H7_RAT;M0R8T1_RAT;MAGI1_RAT	6	-16.9595	0.830405
PP / VP	P09650	P09650	-0.226622	0.226622	0.0006079	0.0785893	48	P09650	Mcpt1	Mast cell protease 1	MCPT1_RAT	7	-14.5366	0.854634
PP / VP	P23928	P23928	-0.267536	0.267536	0.000642266	0.0798386	64	P23928	Cryab	Alpha-crystallin B chain	CRYAB_RAT	9	-16.9263	0.830737
PP / VP	P14046	P14046	-0.124524	0.124524	0.000864182	0.0997513	427	P14046	A1i3	Alpha-1-inhibitor 3	A1I3_RAT	55	-8.26932	0.917307
PP / VP	B4F7B7;M0RD87	B4F7B7;M0RD87	-0.195998	0.195998	0.000839069	0.0997513	72	B4F7B7;M0RD87	Dusp15	Dual specificity protein phosphatase 15;Dual specificity phosphatase-like 15 (Predicted), isoform CRA_b	DUS15_RAT;M0RD87_RAT	12	-12.7031	0.872969
PP / VP	F1M614	F1M614	0.110057	0.110057	0.00129377	0.126711	689	F1M614	Lama2	Laminin subunit alpha 2	F1M614_RAT	113	7.9271	1.07927
PP / VP	P55053	P55053	-0.0907198	0.0907198	0.00126813	0.126711	64	P55053	Fabp5	Fatty acid-binding protein 5	FABP5_RAT	9	-6.09459	0.939054
PP / VP	Q304F3	Q304F3	1.44422	1.44422	0.00123375	0.126711	24	Q304F3	Tnnc2	RCG32327	Q304F3_RAT	5	172.115	2.72115
PP / VP	M0R8B6	M0R8B6	0.439909	0.439909	0.00120624	0.126711	32	M0R8B6	Tubb1	Tubulin beta chain	M0R8B6_RAT	8	35.6519	1.35652
PP / VP	P18589;P18590;Q499Q3	P18589;P18590;Q499Q3	0.636614	0.636614	0.00121594	0.126711	16	P18589;P18590;Q499Q3	Mx2;Mx3;Mx2	Interferon-induced GTP-binding protein Mx2;Interferon-induced GTP-binding protein Mx3;Interferon-induced GTP-binding protein Mx2	MX2_RAT;MX3_RAT;Q499Q3_RAT	4	55.4676	1.55468
PP / VP	A0A0G2JTL5;P52873	A0A0G2JTL5;P52873	-0.369979	0.369979	0.00145086	0.130255	160	A0A0G2JTL5;P52873	Pc	Pyruvate carboxylase, mitochondrial;Pyruvate carboxylase, mitochondrial	A0A0G2JTL5_RAT;PYC_RAT	31	-22.6206	0.773794
PP / VP	G3V949	G3V949	-0.397844	0.397844	0.00144369	0.130255	124	G3V949	Clip2	CAP-Gly domain-containing linker protein 2	G3V949_RAT	25	-24.1009	0.758991
PP / VP	A0A0U1RRZ5;Q6MG48	A0A0U1RRZ5;Q6MG48	-0.407575	0.407575	0.00143905	0.130255	20	A0A0U1RRZ5;Q6MG48	Prrc2a	Protein PRRC2A	A0A0U1RRZ5_RAT;PRC2A_RAT	4	-24.611	0.75389
PP / VP	F1LQN3;Q9JK11	F1LQN3;Q9JK11	-0.00363669	0.00363669	0.00163062	0.139412	248	F1LQN3;Q9JK11	Rtn4	Reticulon;Reticulon-4	F1LQN3_RAT;RTN4_RAT	43	-0.251759	0.997482
PP / VP	A0A0G2JZR1;D4A0F3	A0A0G2JZR1;D4A0F3	0.371286	0.371286	0.00163913	0.139412	20	A0A0G2JZR1;D4A0F3	Osbpl6	Oxysterol-binding protein	A0A0G2JZR1_RAT;D4A0F3_RAT	5	29.3505	1.29351
PP / VP	Q04462	Q04462	0.0970938	0.0970938	0.00169283	0.140288	248	Q04462	Vars	Valine--tRNA ligase	SYVC_RAT	45	6.96166	1.06962
PP / VP	Q63041	Q63041	0.258666	0.258666	0.00178761	0.143072	332	Q63041	A1m	Alpha-1-macroglobulin	A1M_RAT	54	19.6372	1.19637
PP / VP	F8WFH8	F8WFH8	0.0322334	0.0322334	0.00181496	0.143072	128	F8WFH8	Wars	Tryptophan--tRNA ligase, cytoplasmic	F8WFH8_RAT	22	2.25939	1.02259
PP / VP	Q9JK64	Q9JK64	-0.214847	0.214847	0.00194337	0.149547	24	Q9JK64	Abcb1a	Multidrug resistance protein 1a	Q9JK64_RAT	6	-13.8362	0.861638
PP / VP	Q6P7A7	Q6P7A7	0.00845083	0.00845083	0.00201405	0.151381	156	Q6P7A7	Rpn1	Dolichyl-diphosphooligosaccharide--protein glycosyltransferase subunit 1	Q6P7A7_RAT	27	0.587486	1.00587
PP / VP	P05544	P05544	-0.268484	0.268484	0.00209768	0.154084	152	P05544	Serpina3l	Serine protease inhibitor A3L	SPA3L_RAT	23	-16.9808	0.830192
PP / VP	F1M7V6;Q1WIM1	F1M7V6;Q1WIM1	-0.184427	0.184427	0.00217124	0.155943	64	F1M7V6;Q1WIM1	Cadm4	Cell adhesion molecule 4	F1M7V6_RAT;CADM4_RAT	10	-12.0002	0.879998
PP / VP	F1LRB8	F1LRB8	0.254053	0.254053	0.00230763	0.162136	36	F1LRB8	Mat2a	S-adenosylmethionine synthase	F1LRB8_RAT	9	19.2553	1.19255
PP / VP	D3ZAC0	D3ZAC0	0.247727	0.247727	0.00244136	0.167777	64	D3ZAC0	Itga2b	Integrin subunit alpha 2b	D3ZAC0_RAT	12	18.7335	1.18733
PP / VP	F8WFS9;Q05764	F8WFS9;Q05764	-0.129808	0.129808	0.00249174	0.167777	48	F8WFS9;Q05764	Add2	Beta-adducin	F8WFS9_RAT;ADDB_RAT	10	-8.6047	0.913953
PP / VP	Q5XIN4	Q5XIN4	0.462508	0.462508	0.00259913	0.171437	20	Q5XIN4	Mtmr9	Myotubularin-related protein 9	Q5XIN4_RAT	5	37.7935	1.37794
PP / VP	P62804	P62804	-0.127612	0.127612	0.00294427	0.190317	100	P62804	Hist1h4b	Histone H4	H4_RAT	12	-8.4655	0.915345
PP / VP	Q499Q4	Q499Q4	-0.114091	0.114091	0.00303899	0.192589	88	Q499Q4	Pgm1	Phosphoglucomutase-1	Q499Q4_RAT	18	-7.6036	0.923964
PP / VP	Q6P6V0	Q6P6V0	-0.0185701	0.0185701	0.00312702	0.194356	132	Q6P6V0	Gpi	Glucose-6-phosphate isomerase	G6PI_RAT	18	-1.27893	0.987211
PP / VP	Q6IMZ3	Q6IMZ3	-0.104359	0.104359	0.00326342	0.19631	312	Q6IMZ3	Anxa6	Annexin	Q6IMZ3_RAT	47	-6.97817	0.930218
PP / VP	D3ZXA6	D3ZXA6	0.163161	0.163161	0.00327993	0.19631	20	D3ZXA6	Pdpr	Pyruvate dehydrogenase phosphatase regulatory subunit	D3ZXA6_RAT	5	11.9738	1.11974
PP / VP	A0A097BW25;D3ZAF5	A0A097BW25;D3ZAF5	-0.149196	0.149196	0.00343401	0.197801	28	A0A097BW25;D3ZAF5	Postn	Periostin	A0A097BW25_RAT;D3ZAF5_RAT	6	-9.82472	0.901753
PP / VP	Q3B7U1	Q3B7U1	-1.13154	1.13154	0.00342735	0.197801	16	Q3B7U1	Maged2	MAGE family member D2	Q3B7U1_RAT	3	-54.3572	0.456428
PP / VP	F1LYQ8	F1LYQ8	NaN	NaN	0.00348844	0.197801	4	F1LYQ8	Farp1	FERM, ARHGEF and pleckstrin domain-containing protein 1	FARP1_RAT	1	NaN	NaN	PP	VP	NaN	NaN	NaN
PP / VP	A0A140TA99;P62870	A0A140TA99;P62870	-0.228213	0.228213	0.00383731	0.213831	40	A0A140TA99;P62870	Elob	Elongin-B	A0A140TA99_RAT;ELOB_RAT	8	-14.6308	0.853692
PP / VP	G3V874	G3V874	-0.28201	0.28201	0.00405112	0.221919	24	G3V874	Epb41l3	Erythrocyte membrane protein band 4.1-like 3	G3V874_RAT	4	-17.7555	0.822445
PP / VP	P16884	P16884	-0.0631412	0.0631412	0.00445262	0.232111	204	P16884	Nefh	Neurofilament heavy polypeptide	NFH_RAT	25	-4.28223	0.957178
PP / VP	A0A0G2K5C6	A0A0G2K5C6	-0.00600906	0.00600906	0.0044327	0.232111	428	A0A0G2K5C6	Map1a	Microtubule-associated protein 1A	A0A0G2K5C6_RAT	78	-0.41565	0.995843
PP / VP	Q5RJQ4	Q5RJQ4	-0.158225	0.158225	0.00444853	0.232111	60	Q5RJQ4	Sirt2	NAD-dependent protein deacetylase sirtuin-2	SIR2_RAT	14	-10.3873	0.896127
PP / VP	P24090	P24090	-0.102145	0.102145	0.00452897	0.232343	68	P24090	Ahsg	Alpha-2-HS-glycoprotein	FETUA_RAT	9	-6.83531	0.931647
PP / VP	P62329	P62329	-0.711389	0.711389	0.00464276	0.234459	16	P62329	Tmsb4x	Thymosin beta-4	TYB4_RAT	2	-38.9268	0.610732
PP / VP	A0A0G2K261	A0A0G2K261	-0.00560198	0.00560198	0.00507597	0.247481	84	A0A0G2K261	Iars2	Isoleucyl-tRNA synthetase 2, mitochondrial	A0A0G2K261_RAT	18	-0.387547	0.996125
PP / VP	B5DF07	B5DF07	NaN	NaN	0.00513034	0.247481	4	B5DF07	Mrpp3	Mitochondrial ribonuclease P catalytic subunit	MRPP3_RAT	1	NaN	NaN	PP	VP	NaN	NaN	NaN
PP / VP	M0R6K0;P15800	M0R6K0;P15800	0.0431034	0.0431034	0.00528568	0.251225	423	M0R6K0;P15800	Lamb2	Laminin subunit beta-2	M0R6K0_RAT;LAMB2_RAT	62	3.03278	1.03033
PP / VP	Q6PDW1	Q6PDW1	-0.196456	0.196456	0.00546767	0.25245	52	Q6PDW1	Rps12	40S ribosomal protein S12	Q6PDW1_RAT	8	-12.7308	0.872692
PP / VP	A0A0G2JX72;F1M9N4	A0A0G2JX72;F1M9N4	-0.389516	0.389516	0.00543841	0.25245	24	A0A0G2JX72;F1M9N4	Mbnl1	Muscleblind-like-splicing regulator 1	A0A0G2JX72_RAT;F1M9N4_RAT	5	-23.6614	0.763386
PP / VP	A0A0G2K1Q9;Q9JMB3	A0A0G2K1Q9;Q9JMB3	0.0688755	0.0688755	0.00564187	0.256824	248	A0A0G2K1Q9;Q9JMB3	Epb41l3	Erythrocyte membrane protein band 4.1-like 3	A0A0G2K1Q9_RAT;Q9JMB3_RAT	39	4.88988	1.0489
PP / VP	P50475	P50475	0.145651	0.145651	0.00584553	0.25908	200	P50475	Aars	Alanine--tRNA ligase, cytoplasmic	SYAC_RAT	34	10.6229	1.10623
PP / VP	Q6JE36	Q6JE36	-0.180802	0.180802	0.00585176	0.25908	125	Q6JE36	Ndrg1	Protein NDRG1	NDRG1_RAT	13	-11.7788	0.882212
PP / VP	F1LTJ5	F1LTJ5	-0.0491117	0.0491117	0.00603887	0.260235	408	F1LTJ5	NaN	Uncharacterized protein	F1LTJ5_RAT	66	-3.34687	0.966531
PP / VP	Q7TQ70	Q7TQ70	0.224296	0.224296	0.00603348	0.260235	240	Q7TQ70	Fga	Ac1873	Q7TQ70_RAT	31	16.8207	1.16821
PP / VP	D4AE00	D4AE00	0.135136	0.135136	0.0062861	0.263853	96	D4AE00	Ap3b2	AP-3 complex subunit beta	D4AE00_RAT	22	9.81964	1.0982
PP / VP	P62632	P62632	0.201362	0.201362	0.00628586	0.263853	68	P62632	Eef1a2	Elongation factor 1-alpha 2	EF1A2_RAT	10	14.9783	1.14978
PP / VP	A0A0H2UHI2;Q01986	A0A0H2UHI2;Q01986	-0.258107	0.258107	0.00646394	0.267839	48	A0A0H2UHI2;Q01986	Map2k1	Dual-specificity mitogen-activated protein kinase kinase 1;Dual specificity mitogen-activated protein kinase kinase 1	A0A0H2UHI2_RAT;MP2K1_RAT	9	-16.3816	0.836184
PP / VP	A0A0G2K401;A0A0G2K5P9	A0A0G2K401;A0A0G2K5P9	-0.0247603	0.0247603	0.00672604	0.275172	76	A0A0G2K401;A0A0G2K5P9	Pcca	Propionyl-CoA carboxylase alpha chain, mitochondrial;Propionyl-CoA carboxylase alpha chain, mitochondrial	A0A0G2K401_RAT;A0A0G2K5P9_RAT	17	-1.70161	0.982984
PP / VP	D3ZUL3	D3ZUL3	-0.257464	0.257464	0.0068823	0.276611	224	D3ZUL3	Col6a1	Collagen type VI alpha 1 chain	D3ZUL3_RAT	34	-16.3443	0.836557
PP / VP	P02600	P02600	1.90326	1.90326	0.0069324	0.276611	36	P02600	Myl1	Myosin light chain 1/3, skeletal muscle isoform	MYL1_RAT	8	274.056	3.74056
PP / VP	Q2TA68	Q2TA68	0.111923	0.111923	0.0071246	0.27743	132	Q2TA68	Opa1	Dynamin-like 120 kDa protein, mitochondrial	OPA1_RAT	24	8.06677	1.08067
PP / VP	F1M403	F1M403	0.334614	0.334614	0.00705362	0.27743	120	F1M403	Ube2o	Ubiquitin-conjugating enzyme E2O	F1M403_RAT	25	26.104	1.26104
PP / VP	A0A0G2K0P2;G3V603;O54835;O70436;P84025	A0A0G2K0P2;G3V603;O54835;O70436;P84025	0.318117	0.318117	0.00740583	0.284948	8	A0A0G2K0P2;G3V603;O54835;O70436;P84025	Smad2;LOC103691556;Smad9;Smad2;Smad3	Mothers against decapentaplegic homolog;Mothers against decapentaplegic homolog;Mothers against decapentaplegic homolog 9;Mothers against decapentaplegic homolog 2;Mothers against decapentaplegic homolog 3	A0A0G2K0P2_RAT;G3V603_RAT;SMAD9_RAT;SMAD2_RAT;SMAD3_RAT	2	24.6703	1.2467
PP / VP	A0A096MJS3;A0A096MK47	A0A096MJS3;A0A096MK47	-0.28437	0.28437	0.00759589	0.288197	52	A0A096MJS3;A0A096MK47	Mlip	Muscular LMNA-interacting protein (Fragment);Muscular LMNA-interacting protein	A0A096MJS3_RAT;MLIP_RAT	9	-17.89	0.8211
PP / VP	F1M853	F1M853	-0.0868435	0.0868435	0.00770886	0.288197	164	F1M853	Rrbp1	Ribosome-binding protein 1	F1M853_RAT	31	-5.84194	0.941581
PP / VP	Q3KRF2	Q3KRF2	0.0587084	0.0587084	0.00775779	0.288197	240	Q3KRF2	Hdlbp	High density lipoprotein binding protein (Vigilin)	Q3KRF2_RAT	44	4.15329	1.04153
PP / VP	O35179	O35179	0.199199	0.199199	0.00802974	0.29491	56	O35179	Sh3gl2	Endophilin-A1	SH3G2_RAT	9	14.8061	1.14806
PP / VP	A0A0G2K5P8;Q9JLZ1	A0A0G2K5P8;Q9JLZ1	-0.0050605	0.0050605	0.00824423	0.299386	76	A0A0G2K5P8;Q9JLZ1	Glrx3	Glutaredoxin-3	A0A0G2K5P8_RAT;GLRX3_RAT	15	-0.350153	0.996498
PP / VP	A0A0H2UHU1;P61515	A0A0H2UHU1;P61515	0.279346	0.279346	0.00853946	0.300622	12	A0A0H2UHU1;P61515	Rpl37a;Rpl37a-ps1	60S ribosomal protein L37a;Putative 60S ribosomal protein L37a	A0A0H2UHU1_RAT;RL37P_RAT	2	21.3644	1.21364
PP / VP	F1LPT0	F1LPT0	-0.421237	0.421237	0.00853793	0.300622	36	F1LPT0	Gjc3	Gap junction protein	F1LPT0_RAT	6	-25.3216	0.746784
PP / VP	Q568Z4	Q568Z4	NaN	NaN	0.00855732	0.300622	4	Q568Z4	Spcs3	Signal peptidase complex subunit 3	SPCS3_RAT	1	NaN	NaN	PP	VP	NaN	NaN	NaN
PP / VP	G3V6G7	G3V6G7	0.458744	0.458744	0.00869462	0.302162	16	G3V6G7	Pnpt1	Polyribonucleotide nucleotidyltransferase 1	G3V6G7_RAT	4	37.4345	1.37434
PP / VP	P19527	P19527	-0.108606	0.108606	0.00891721	0.304919	296	P19527	Nefl	Neurofilament light polypeptide	NFL_RAT	34	-7.2516	0.927484
PP / VP	O35550	O35550	0.513743	0.513743	0.00896266	0.304919	24	O35550	Rabep1	Rab GTPase-binding effector protein 1	RABE1_RAT	6	42.7749	1.42775
PP / VP	G3V8C3;P31000	G3V8C3;P31000	-0.0954923	0.0954923	0.00912996	0.307375	334	G3V8C3;P31000	Vim	Vimentin	G3V8C3_RAT;VIME_RAT	39	-6.40472	0.935953
PP / VP	M0R649;M0RBF8;Q62824	M0R649;M0RBF8;Q62824	-0.134564	0.134564	0.00933727	0.311114	56	M0R649;M0RBF8;Q62824	Exoc4	Exocyst complex component 4	M0R649_RAT;M0RBF8_RAT;EXOC4_RAT	13	-8.9055	0.910945
PP / VP	P08649	P08649	0.111822	0.111822	0.00946196	0.312051	152	P08649	C4	Complement C4	CO4_RAT	31	8.05918	1.08059
PP / VP	P04218	P04218	-0.438454	0.438454	0.00979912	0.315579	16	P04218	Cd200	OX-2 membrane glycoprotein	OX2G_RAT	3	-26.2075	0.737925
PP / VP	A0A0G2JVP4;F1LM30;F1LPW0	A0A0G2JVP4;F1LM30;F1LPW0	0.193567	0.193567	0.00986265	0.315579	40	A0A0G2JVP4;F1LM30;F1LPW0	Ighm	Immunoglobulin heavy constant mu	A0A0G2JVP4_RAT;F1LM30_RAT;F1LPW0_RAT	8	14.3588	1.14359
PP / VP	P22057	P22057	0.279382	0.279382	0.00976606	0.315579	16	P22057	Ptgds	Prostaglandin-H2 D-isomerase	PTGDS_RAT	3	21.3675	1.21367
PP / VP	Q5XIF6	Q5XIF6	-0.00717528	0.00717528	0.0099595	0.315579	32	Q5XIF6	Tuba4a	Tubulin alpha-4A chain	TBA4A_RAT	5	-0.496118	0.995039
PP / VP	O35142	O35142	0.0520689	0.0520689	0.0100692	0.315959	140	O35142	Copb2	Coatomer subunit beta'	COPB2_RAT	28	3.67506	1.03675
PP / VP	A0A0G2K4R1	A0A0G2K4R1	NaN	NaN	0.0102305	0.317931	4	A0A0G2K4R1	Ppp1r12c	Protein phosphatase 1 regulatory subunit	A0A0G2K4R1_RAT	1	NaN	NaN	PP	VP	NaN	NaN	NaN
PP / VP	Q5RJR8	Q5RJR8	0.25248	0.25248	0.0103937	0.319929	52	Q5RJR8	Lrrc59	Leucine-rich repeat-containing protein 59	LRC59_RAT	9	19.1253	1.19125
PP / VP	Q7TNZ9	Q7TNZ9	-0.86446	0.86446	0.0107537	0.327885	12	Q7TNZ9	Cmtm6	CKLF-like MARVEL transmembrane domain-containing 6	Q7TNZ9_RAT	2	-45.0748	0.549252
PP / VP	D4A2G9	D4A2G9	0.139979	0.139979	0.011354	0.33978	36	D4A2G9	Ranbp1	RAN-binding protein 1	D4A2G9_RAT	6	10.1889	1.10189
PP / VP	F1LNK0	F1LNK0	-0.0648865	0.0648865	0.011286	0.33978	244	F1LNK0	Map2	Microtubule-associated protein	F1LNK0_RAT	48	-4.39795	0.956021
PP / VP	D3ZBN0	D3ZBN0	-0.0431288	0.0431288	0.0115054	0.341152	24	D3ZBN0	Hist1h1b	Histone H1.5	H15_RAT	5	-2.94522	0.970548
PP / VP	B0K031;P05426	B0K031;P05426	0.0181144	0.0181144	0.0141185	0.343616	104	B0K031;P05426	Rpl7	60S ribosomal protein L7	B0K031_RAT;RL7_RAT	16	1.26351	1.01264
PP / VP	F1LRV4;O88600	F1LRV4;O88600	-0.0472964	0.0472964	0.0135694	0.343616	248	F1LRV4;O88600	Hspa4	Heat shock 70 kDa protein 4	F1LRV4_RAT;HSP74_RAT	42	-3.22518	0.967748
PP / VP	A0A0G2JWD2;Q5XI81	A0A0G2JWD2;Q5XI81	0.0983285	0.0983285	0.0135359	0.343616	100	A0A0G2JWD2;Q5XI81	Fxr1	Fragile X mental retardation syndrome-related protein 1	A0A0G2JWD2_RAT;FXR1_RAT	20	7.05324	1.07053
PP / VP	Q4FZY0	Q4FZY0	-0.162168	0.162168	0.0121522	0.343616	28	Q4FZY0	Efhd2	EF-hand domain-containing protein D2	EFHD2_RAT	6	-10.6319	0.893681
PP / VP	Q00981	Q00981	-0.158938	0.158938	0.0139355	0.343616	124	Q00981	Uchl1	Ubiquitin carboxyl-terminal hydrolase isozyme L1	UCHL1_RAT	13	-10.4316	0.895684
PP / VP	A0A0G2KB63;Q5XIH7	A0A0G2KB63;Q5XIH7	0.0191805	0.0191805	0.0127069	0.343616	72	A0A0G2KB63;Q5XIH7	Phb2	Prohibitin-2	A0A0G2KB63_RAT;PHB2_RAT	12	1.33837	1.01338
PP / VP	F1LXA0	F1LXA0	0.236802	0.236802	0.0127632	0.343616	36	F1LXA0	Ndufa12	NADH dehydrogenase [ubiquinone] 1 alpha subcomplex subunit 12	F1LXA0_RAT	6	17.8377	1.17838
PP / VP	O55096	O55096	0.0683233	0.0683233	0.0140947	0.343616	96	O55096	Dpp3	Dipeptidyl peptidase 3	DPP3_RAT	19	4.84974	1.0485
PP / VP	Q5M8C3	Q5M8C3	-0.203628	0.203628	0.0138723	0.343616	56	Q5M8C3	Serpina4	Serine (Or cysteine) proteinase inhibitor, clade A (Alpha-1 antiproteinase, antitrypsin), member 4	Q5M8C3_RAT	11	-13.1636	0.868364
PP / VP	Q63560	Q63560	-0.129443	0.129443	0.0130425	0.343616	128	Q63560	Map6	Microtubule-associated protein 6	MAP6_RAT	27	-8.58156	0.914184
PP / VP	A0A0G2JXT3;F1LND7;P05369	A0A0G2JXT3;F1LND7;P05369	-0.144111	0.144111	0.0138842	0.343616	68	A0A0G2JXT3;F1LND7;P05369	Fdps	Farnesyl pyrophosphate synthase	A0A0G2JXT3_RAT;F1LND7_RAT;FPPS_RAT	11	-9.50633	0.904937
PP / VP	Q6AY58	Q6AY58	-0.181132	0.181132	0.0141401	0.343616	20	Q6AY58	Bcap31	B-cell receptor-associated protein 31	Q6AY58_RAT	2	-11.799	0.88201
PP / VP	A0A0G2JTT2;A0A0G2JUQ5;O55012;Q498N4;Q66WT9	A0A0G2JTT2;A0A0G2JUQ5;O55012;Q498N4;Q66WT9	0.132036	0.132036	0.0122136	0.343616	32	A0A0G2JTT2;A0A0G2JUQ5;O55012;Q498N4;Q66WT9	Picalm	Phosphatidylinositol binding clathrin assembly protein, isoform CRA_a;Phosphatidylinositol binding clathrin assembly protein, isoform CRA_d;Phosphatidylinositol-binding clathrin assembly protein;Phosphatidylinositol binding clathrin assembly protein, isoform CRA_c;Clathrin-assembly lymphoid myeloid leukemia protein	A0A0G2JTT2_RAT;A0A0G2JUQ5_RAT;PICAL_RAT;Q498N4_RAT;Q66WT9_RAT	7	9.58392	1.09584
PP / VP	D3ZW09	D3ZW09	0.12591	0.12591	0.0137074	0.343616	40	D3ZW09	Sorcs2	Sortilin-related VPS10 domain-containing receptor 2	D3ZW09_RAT	11	9.11959	1.0912
PP / VP	Q6DGF2	Q6DGF2	-0.055893	0.055893	0.0132376	0.343616	44	Q6DGF2	Clint1	Clathrin interactor 1	Q6DGF2_RAT	9	-3.80012	0.961999
PP / VP	Q6AXM8	Q6AXM8	-0.220705	0.220705	0.0121108	0.343616	32	Q6AXM8	Pon2	Serum paraoxonase/arylesterase 2	PON2_RAT	6	-14.1854	0.858146
PP / VP	B0BNL2	B0BNL2	0.0745759	0.0745759	0.0134303	0.343616	44	B0BNL2	Pin1	Peptidyl-prolyl cis-trans isomerase	B0BNL2_RAT	5	5.30514	1.05305
PP / VP	Q5U2R9	Q5U2R9	0.382747	0.382747	0.0136899	0.343616	32	Q5U2R9	Scfd2	Sec1 family domain-containing 2	Q5U2R9_RAT	8	30.3822	1.30382
PP / VP	D3ZBC7	D3ZBC7	NaN	NaN	0.0120965	0.343616	4	D3ZBC7	Dhrs13	Dehydrogenase/reductase 13	D3ZBC7_RAT	1	NaN	NaN	PP	VP	NaN	NaN	NaN
PP / VP	Q32KK2	Q32KK2	-0.507471	0.507471	0.0129284	0.343616	28	Q32KK2	Arsa	Arylsulfatase A	Q32KK2_RAT	5	-29.6546	0.703454
PP / VP	D4ABV0	D4ABV0	NaN	NaN	0.012969	0.343616	4	D4ABV0	Smim26	RGD1566320 (Predicted)	D4ABV0_RAT	1	NaN	NaN	PP	VP	NaN	NaN	NaN
PP / VP	A0A0G2K0N9;F8WG17;P27768	A0A0G2K0N9;F8WG17;P27768	1.53321	1.53321	0.0120061	0.343616	8	A0A0G2K0N9;F8WG17;P27768	Tnni2	Troponin I, fast skeletal muscle;Troponin I, fast skeletal muscle;Troponin I, fast skeletal muscle	A0A0G2K0N9_RAT;F8WG17_RAT;TNNI2_RAT	3	189.429	2.89429
PP / VP	A0A096MJB7;M0R3V5;M0RAK3;Q66HR0	A0A096MJB7;M0R3V5;M0RAK3;Q66HR0	0.515471	0.515471	0.0123319	0.343616	12	A0A096MJB7;M0R3V5;M0RAK3;Q66HR0	Slc12a9	Solute carrier family 12 member 9 (Fragment);Solute carrier family 12 member 9;Solute carrier family 12 member 9;Solute carrier family 12 member 9	A0A096MJB7_RAT;M0R3V5_RAT;M0RAK3_RAT;S12A9_RAT	3	42.9461	1.42946
PP / VP	G3V7F6	G3V7F6	-1.27209	1.27209	0.0128535	0.343616	8	G3V7F6	RGD1561590	RCG23529, isoform CRA_a	G3V7F6_RAT	2	-58.5941	0.414059
PP / VP	A0A0G2K8Z9	A0A0G2K8Z9	-0.151689	0.151689	0.0142827	0.34449	164	A0A0G2K8Z9	Kif13b	Kinesin family member 13B	A0A0G2K8Z9_RAT	35	-9.98043	0.900196
PP / VP	D3ZSZ6	D3ZSZ6	0.265577	0.265577	0.0153496	0.352328	28	D3ZSZ6	Dgkh	Diacylglycerol kinase	D3ZSZ6_RAT	7	20.2117	1.20212
PP / VP	P07943	P07943	-0.146637	0.146637	0.0158171	0.352328	124	P07943	Akr1b1	Aldo-keto reductase family 1 member B1	ALDR_RAT	16	-9.66463	0.903354
PP / VP	Q4V7A0	Q4V7A0	0.0955551	0.0955551	0.0159158	0.352328	40	Q4V7A0	Wdr61	WD repeat-containing protein 61	WDR61_RAT	9	6.84764	1.06848
PP / VP	P43278	P43278	-0.367264	0.367264	0.0149245	0.352328	24	P43278	H1f0	Histone H1.0	H10_RAT	3	-22.4749	0.775251
PP / VP	D4A962	D4A962	-0.29388	0.29388	0.0155394	0.352328	44	D4A962	Hnrnpul1	Heterogeneous nuclear ribonucleoprotein U-like 1	D4A962_RAT	11	-18.4295	0.815705
PP / VP	A0A0G2JUG7	A0A0G2JUG7	-1.10107	1.10107	0.0158578	0.352328	16	A0A0G2JUG7	Iqsec1	IQ motif and Sec7 domain 1	A0A0G2JUG7_RAT	4	-53.3829	0.466171
PP / VP	D4A820	D4A820	-0.19035	0.19035	0.0156677	0.352328	16	D4A820	Cyp2s1	Cytochrome P450, family 2, subfamily s, polypeptide 1	D4A820_RAT	4	-12.3607	0.876393
PP / VP	F1LPG9;Q80X08	F1LPG9;Q80X08	-0.0759694	0.0759694	0.0150927	0.352328	56	F1LPG9;Q80X08	Washc2c;Washc2	WASH complex subunit 2C;WASH complex subunit 2	F1LPG9_RAT;WASC2_RAT	14	-5.12955	0.948704
PP / VP	F7FJQ3	F7FJQ3	-0.765839	0.765839	0.0149685	0.352328	16	F7FJQ3	Npc2	NPC intracellular cholesterol transporter 2	F7FJQ3_RAT	2	-41.1889	0.588111
PP / VP	B4F796;F1LQ70	B4F796;F1LQ70	NaN	NaN	0.0148375	0.352328	4	B4F796;F1LQ70	Alox12	Alox12 protein;Arachidonate 12-lipoxygenase, 12S-type	B4F796_RAT;LOX12_RAT	1	NaN	NaN	PP	VP	NaN	NaN	NaN
PP / VP	B1WC73	B1WC73	NaN	NaN	0.0156279	0.352328	4	B1WC73	Arl6	ADP-ribosylation factor-like 6 (Predicted), isoform CRA_a	B1WC73_RAT	1	NaN	NaN	PP	VP	NaN	NaN	NaN
PP / VP	B4F786	B4F786	NaN	NaN	0.0155639	0.352328	4	B4F786	Cd2bp2	CD2 antigen (Cytoplasmic tail) binding protein 2 (Predicted), isoform CRA_a	B4F786_RAT	1	NaN	NaN	PP	VP	NaN	NaN	NaN
PP / VP	G3V7Q7	G3V7Q7	0.101767	0.101767	0.0165577	0.364045	208	G3V7Q7	Iqgap1	IQ motif containing GTPase activating protein 1 (Predicted), isoform CRA_b	G3V7Q7_RAT	46	7.30873	1.07309
PP / VP	P50137	P50137	-0.0808338	0.0808338	0.0172254	0.367291	208	P50137	Tkt	Transketolase	TKT_RAT	30	-5.4489	0.945511
PP / VP	P02680	P02680	0.302753	0.302753	0.0173853	0.367291	164	P02680	Fgg	Fibrinogen gamma chain	FIBG_RAT	22	23.3496	1.2335
PP / VP	P09527	P09527	0.062867	0.062867	0.0170328	0.367291	80	P09527	Rab7a	Ras-related protein Rab-7a	RAB7A_RAT	13	4.45395	1.04454
PP / VP	D3ZQM0	D3ZQM0	-0.307054	0.307054	0.0173872	0.367291	52	D3ZQM0	Sf3a1	Splicing factor 3a, subunit 1	D3ZQM0_RAT	12	-19.1709	0.808291
PP / VP	P67874	P67874	0.591977	0.591977	0.0171346	0.367291	26	P67874	Csnk2b	Casein kinase II subunit beta	CSK2B_RAT	6	50.7311	1.50731
PP / VP	A0A0G2K9N0;B1WBX6	A0A0G2K9N0;B1WBX6	NaN	NaN	0.0169023	0.367291	4	A0A0G2K9N0;B1WBX6	Smap2	Small ArfGAP2	A0A0G2K9N0_RAT;B1WBX6_RAT	1	NaN	NaN	PP	VP	NaN	NaN	NaN
PP / VP	B0BN30	B0BN30	0.274573	0.274573	0.0177143	0.370295	32	B0BN30	Mtch1	Mitochondrial carrier 1	B0BN30_RAT	7	20.9636	1.20964
PP / VP	Q5XIT9	Q5XIT9	0.10745	0.10745	0.01788	0.370295	48	Q5XIT9	Mccc2	Methylcrotonoyl-CoA carboxylase beta chain, mitochondrial	MCCB_RAT	11	7.73224	1.07732
PP / VP	E9PSY8	E9PSY8	0.297515	0.297515	0.0179877	0.370295	84	E9PSY8	Eps15	Epidermal growth factor receptor pathway substrate 15	E9PSY8_RAT	18	22.9026	1.22903
PP / VP	F1LP76	F1LP76	0.187803	0.187803	0.0179613	0.370295	32	F1LP76	Elp1	Elongator complex protein 1	F1LP76_RAT	8	13.9028	1.13903
PP / VP	A0A0G2K4G3;Q71UE8	A0A0G2K4G3;Q71UE8	NaN	NaN	0.0181308	0.370878	8	A0A0G2K4G3;Q71UE8	Nedd8	NEDD8	A0A0G2K4G3_RAT;NEDD8_RAT	1	NaN	NaN	PP	VP	NaN	NaN	NaN
PP / VP	Q6NX65	Q6NX65	0.372378	0.372378	0.0185313	0.376686	20	Q6NX65	Pdcd10	Programmed cell death protein 10	PDC10_RAT	4	29.4485	1.29448
PP / VP	D3Z9Z0	D3Z9Z0	-0.042154	0.042154	0.0187057	0.376978	244	D3Z9Z0	Ank1	Ankyrin 1	D3Z9Z0_RAT	45	-2.87962	0.971204
PP / VP	A0A0G2JV16;F1LQ91	A0A0G2JV16;F1LQ91	-0.184604	0.184604	0.0187789	0.376978	16	A0A0G2JV16;F1LQ91	Dock11	Dedicator of cytokinesis 11	A0A0G2JV16_RAT;F1LQ91_RAT	4	-12.0109	0.879891
PP / VP	A0A0G2K7L8;F1LMS5;P49744	A0A0G2K7L8;F1LMS5;P49744	0.562608	0.562608	0.0189301	0.377666	36	A0A0G2K7L8;F1LMS5;P49744	Thbs4	Thrombospondin-4	A0A0G2K7L8_RAT;F1LMS5_RAT;TSP4_RAT	8	47.6937	1.47694
PP / VP	Q66HG5	Q66HG5	0.225895	0.225895	0.0192588	0.379236	64	Q66HG5	Tm9sf2	Transmembrane 9 superfamily member 2	TM9S2_RAT	11	16.9503	1.1695
PP / VP	A0A096MJM1;Q32PX6	A0A096MJM1;Q32PX6	-0.391892	0.391892	0.0194327	0.379236	44	A0A096MJM1;Q32PX6	Rhog	Ras homolog family member G (Fragment);Ras homolog family member G	A0A096MJM1_RAT;Q32PX6_RAT	8	-23.7871	0.762129
PP / VP	Q0VGK0	Q0VGK0	-0.847282	0.847282	0.0194477	0.379236	16	Q0VGK0	Gabarapl1	Gamma-aminobutyric acid receptor-associated protein-like 1	GBRL1_RAT	2	-44.4169	0.555831
PP / VP	B2RYI2	B2RYI2	0.10399	0.10399	0.0194781	0.379236	40	B2RYI2	Srp68	Signal recognition particle subunit SRP68	B2RYI2_RAT	10	7.4742	1.07474
PP / VP	P61314	P61314	0.173022	0.173022	0.0199246	0.380298	44	P61314	Rpl15	60S ribosomal protein L15	RL15_RAT	7	12.7417	1.12742
PP / VP	Q499P2	Q499P2	-0.0123475	0.0123475	0.0200033	0.380298	72	Q499P2	Lta4h	Leukotriene A(4) hydrolase	Q499P2_RAT	17	-0.852213	0.991478
PP / VP	P11030;Q6TXF3	P11030;Q6TXF3	-0.24845	0.24845	0.0197999	0.380298	16	P11030;Q6TXF3	Dbi	Acyl-CoA-binding protein	ACBP_RAT;Q6TXF3_RAT	2	-15.8199	0.841801
PP / VP	Q5PPI8	Q5PPI8	NaN	NaN	0.0198392	0.380298	4	Q5PPI8	Rmc1	Regulator of MON1-CCZ1	Q5PPI8_RAT	1	NaN	NaN	PP	VP	NaN	NaN	NaN
PP / VP	Q5RK30	Q5RK30	0.434576	0.434576	0.0202075	0.381933	20	Q5RK30	Sbds	Ribosome maturation protein SBDS	SBDS_RAT	4	35.1514	1.35151
PP / VP	Q6AY56	Q6AY56	NaN	NaN	0.020798	0.39081	8	Q6AY56	Tuba8	Tubulin alpha-8 chain	TBA8_RAT	1	NaN	NaN	PP	VP	NaN	NaN	NaN
PP / VP	F1M8K0	F1M8K0	-0.0951272	0.0951272	0.0210993	0.394179	104	F1M8K0	Dag1	Dystroglycan 1	F1M8K0_RAT	17	-6.38103	0.93619
PP / VP	F1M4I1	F1M4I1	-0.187279	0.187279	0.0230929	0.394331	36	F1M4I1	NaN	Uncharacterized protein	F1M4I1_RAT	7	-12.174	0.87826
PP / VP	G3V8T4	G3V8T4	0.075671	0.075671	0.0238433	0.394331	100	G3V8T4	Ddb1	DNA damage-binding protein 1	G3V8T4_RAT	23	5.3851	1.05385
PP / VP	M0RBF1;M0RBJ7	M0RBF1;M0RBJ7	-0.0251994	0.0251994	0.0215061	0.394331	466	M0RBF1;M0RBJ7	C3	Complement C3	M0RBF1_RAT;M0RBJ7_RAT	76	-1.73152	0.982685
PP / VP	Q68FY4	Q68FY4	-0.177769	0.177769	0.0229542	0.394331	136	Q68FY4	Gc	Group specific component	Q68FY4_RAT	27	-11.5931	0.884069
PP / VP	P04636	P04636	-0.0964823	0.0964823	0.0218771	0.394331	100	P04636	Mdh2	Malate dehydrogenase, mitochondrial	MDHM_RAT	14	-6.46892	0.935311
PP / VP	P06907	P06907	-0.241779	0.241779	0.0239983	0.394331	132	P06907	Mpz	Myelin protein P0	MYP0_RAT	16	-15.4298	0.845702
PP / VP	P14480	P14480	0.275876	0.275876	0.0233917	0.394331	254	P14480	Fgb	Fibrinogen beta chain	FIBB_RAT	32	21.0729	1.21073
PP / VP	Q68FU3	Q68FU3	-0.00115733	0.00115733	0.0238489	0.394331	68	Q68FU3	Etfb	Electron transfer flavoprotein subunit beta	ETFB_RAT	13	-0.0801879	0.999198
PP / VP	D3ZSA9	D3ZSA9	0.181859	0.181859	0.0226813	0.394331	144	D3ZSA9	Nomo1	Nodal modulator 1	D3ZSA9_RAT	29	13.4345	1.13434
PP / VP	Q63768	Q63768	0.286079	0.286079	0.0230307	0.394331	48	Q63768	Crk	Adapter molecule crk	CRK_RAT	10	21.9322	1.21932
PP / VP	Q9Z272	Q9Z272	0.015431	0.015431	0.022292	0.394331	56	Q9Z272	Git1	ARF GTPase-activating protein GIT1	GIT1_RAT	11	1.07534	1.01075
PP / VP	A0A0G2K737;Q920J4	A0A0G2K737;Q920J4	-0.0140115	0.0140115	0.021595	0.394331	76	A0A0G2K737;Q920J4	Txnl1	Thioredoxin-like protein 1	A0A0G2K737_RAT;TXNL1_RAT	14	-0.966501	0.990335
PP / VP	F1M392	F1M392	-0.0102795	0.0102795	0.0234289	0.394331	88	F1M392	Limch1	LIM and calponin homology domains 1	F1M392_RAT	19	-0.709988	0.9929
PP / VP	Q6IN22	Q6IN22	0.112191	0.112191	0.0240356	0.394331	112	Q6IN22	Ctsb	Cathepsin B	Q6IN22_RAT	14	8.08684	1.08087
PP / VP	A0A0G2K0T6	A0A0G2K0T6	-0.167229	0.167229	0.0219533	0.394331	68	A0A0G2K0T6	Sncg	Gamma-synuclein	A0A0G2K0T6_RAT	10	-10.9448	0.890552
PP / VP	D3ZAF6	D3ZAF6	0.0312333	0.0312333	0.0224549	0.394331	16	D3ZAF6	Atp5mf	ATP synthase subunit f, mitochondrial	ATPK_RAT	3	2.18853	1.02189
PP / VP	D4A3C2	D4A3C2	-0.0104383	0.0104383	0.0238134	0.394331	36	D4A3C2	RGD1304884	Similar to RIKEN cDNA 6430548M08	D4A3C2_RAT	8	-0.720919	0.992791
PP / VP	F7EMB2;Q6QI16	F7EMB2;Q6QI16	-0.27028	0.27028	0.023822	0.394331	36	F7EMB2;Q6QI16	Rtraf	RNA transcription, translation and transport factor;LRRGT00192	F7EMB2_RAT;Q6QI16_RAT	8	-17.0842	0.829158
PP / VP	A0A0G2K8N9	A0A0G2K8N9	-0.325767	0.325767	0.0232103	0.394331	24	A0A0G2K8N9	Nek9	NIMA-related kinase 9	A0A0G2K8N9_RAT	6	-20.2126	0.797874
PP / VP	A0JPL2;D3ZRE3;P97633	A0JPL2;D3ZRE3;P97633	-0.0838441	0.0838441	0.0212762	0.394331	20	A0JPL2;D3ZRE3;P97633	Csnk1a1	Casein kinase 1, alpha 1, isoform CRA_d;Casein kinase I isoform alpha;Casein kinase I isoform alpha	A0JPL2_RAT;D3ZRE3_RAT;KC1A_RAT	4	-5.64598	0.94354
PP / VP	D3ZJ91	D3ZJ91	1.0613	1.0613	0.0224775	0.394331	8	D3ZJ91	Ddhd2	DDHD domain-containing 2	D3ZJ91_RAT	2	108.681	2.08681
PP / VP	D3ZR52	D3ZR52	0.305068	0.305068	0.0222254	0.394331	20	D3ZR52	Lpcat4	Lysophosphatidylcholine acyltransferase 4	D3ZR52_RAT	5	23.5477	1.23548
PP / VP	Q6AXN3;Q6QI88	Q6AXN3;Q6QI88	0.296456	0.296456	0.0220461	0.394331	12	Q6AXN3;Q6QI88	Tmed5	Transmembrane emp24 domain-containing protein 5;LRRG00120	TMED5_RAT;Q6QI88_RAT	3	22.8124	1.22812
PP / VP	P36370;P97949	P36370;P97949	0.407267	0.407267	0.0221147	0.394331	8	P36370;P97949	Tap1	Antigen peptide transporter 1	TAP1_RAT;P97949_RAT	2	32.6171	1.32617
PP / VP	F1LQ55;P11915	F1LQ55;P11915	-0.234049	0.234049	0.0242102	0.395188	72	F1LQ55;P11915	Scp2	Non-specific lipid-transfer protein	F1LQ55_RAT;NLTP_RAT	14	-14.9755	0.850245
PP / VP	O08700	O08700	-0.109643	0.109643	0.0247869	0.40257	52	O08700	Vps45	Vacuolar protein sorting-associated protein 45	VPS45_RAT	12	-7.31829	0.926817
PP / VP	F1M7P4	F1M7P4	NaN	NaN	0.0250715	0.405155	8	F1M7P4	Prph	Peripherin	F1M7P4_RAT	1	NaN	NaN	PP	VP	NaN	NaN	NaN
PP / VP	P62630	P62630	0.0333233	0.0333233	0.0253909	0.408276	143	P62630	Eef1a1	Elongation factor 1-alpha 1	EF1A1_RAT	19	2.33668	1.02337
PP / VP	D3ZAN3	D3ZAN3	0.102254	0.102254	0.0256407	0.410252	172	D3ZAN3	Ganab	Alpha glucosidase 2 alpha neutral subunit (Predicted)	D3ZAN3_RAT	28	7.34493	1.07345
PP / VP	B4F7E8	B4F7E8	0.156206	0.156206	0.026205	0.415604	76	B4F7E8	Fam129b	Niban-like protein 1	NIBL1_RAT	16	11.4353	1.11435
PP / VP	Q4KLK7	Q4KLK7	-0.170094	0.170094	0.0267468	0.415604	52	Q4KLK7	Nop56	NOP56 ribonucleoprotein	Q4KLK7_RAT	12	-11.1215	0.888785
PP / VP	F1LV89	F1LV89	0.955921	0.955921	0.0264948	0.415604	40	F1LV89	Rap1gap	Rap1 GTPase-activating protein	F1LV89_RAT	7	93.9818	1.93982
PP / VP	P30904	P30904	-0.145332	0.145332	0.0266645	0.415604	16	P30904	Mif	Macrophage migration inhibitory factor	MIF_RAT	3	-9.58285	0.904171
PP / VP	D4AA63	D4AA63	-0.362621	0.362621	0.0264887	0.415604	16	D4AA63	Ubqln2	Ubiquilin 2	D4AA63_RAT	4	-22.2249	0.777751
PP / VP	A0A0G2K654	A0A0G2K654	NaN	NaN	0.0266705	0.415604	4	A0A0G2K654	Hist1h1c	Histone cluster 1 H1 family member c	A0A0G2K654_RAT	1	NaN	NaN	PP	VP	NaN	NaN	NaN
PP / VP	G3V6U3	G3V6U3	0.238246	0.238246	0.0277009	0.41727	88	G3V6U3	Alg2	ALG2, alpha-1,3/1,6-mannosyltransferase	G3V6U3_RAT	15	17.9558	1.17956
PP / VP	Q568Z3	Q568Z3	-0.448135	0.448135	0.0273562	0.41727	8	Q568Z3	Paqr4	Progestin and adipoQ receptor family member 4	Q568Z3_RAT	2	-26.701	0.73299
PP / VP	Q63617;Q6P136	Q63617;Q6P136	0.0209575	0.0209575	0.027713	0.41727	180	Q63617;Q6P136	Hyou1	Hypoxia up-regulated protein 1;Hyou1 protein	HYOU1_RAT;Q6P136_RAT	33	1.46326	1.01463
PP / VP	O88267	O88267	0.157008	0.157008	0.0271823	0.41727	60	O88267	Acot1	Acyl-coenzyme A thioesterase 1	ACOT1_RAT	12	11.4972	1.11497
PP / VP	A0A0G2K2V2;G3V9N8	A0A0G2K2V2;G3V9N8	-0.0266184	0.0266184	0.0276659	0.41727	136	A0A0G2K2V2;G3V9N8	Ap1b1	AP complex subunit beta	A0A0G2K2V2_RAT;G3V9N8_RAT	30	-1.82813	0.981719
PP / VP	G3V6L8;P70483	G3V6L8;P70483	0.0874678	0.0874678	0.0277577	0.41727	44	G3V6L8;P70483	Strn	RCG61894, isoform CRA_a;Striatin	G3V6L8_RAT;STRN_RAT	10	6.25037	1.0625
PP / VP	F1LPG5	F1LPG5	-0.505044	0.505044	0.0277514	0.41727	8	F1LPG5	Ndufb4	NADH:ubiquinone oxidoreductase subunit B4	F1LPG5_RAT	2	-29.5361	0.704639
PP / VP	B5DEI0	B5DEI0	0.122646	0.122646	0.0282074	0.418071	64	B5DEI0	Pcyox1l	Pcyox1l protein	B5DEI0_RAT	10	8.87298	1.08873
PP / VP	D3ZUY8	D3ZUY8	0.00506976	0.00506976	0.0288459	0.418071	84	D3ZUY8	Ap2a1	AP-2 complex subunit alpha	D3ZUY8_RAT	18	0.352027	1.00352
PP / VP	P61983	P61983	-0.122412	0.122412	0.0288145	0.418071	76	P61983	Ywhag	14-3-3 protein gamma	1433G_RAT	10	-8.13497	0.91865
PP / VP	Q6LED0	Q6LED0	0.194977	0.194977	0.0284754	0.418071	28	Q6LED0	NaN	Histone H3.1	H31_RAT	4	14.4706	1.14471
PP / VP	F1LPG3;O88588	F1LPG3;O88588	-0.415027	0.415027	0.0287781	0.418071	12	F1LPG3;O88588	Pacs1	Phosphofurin acidic cluster sorting protein 1	F1LPG3_RAT;PACS1_RAT	3	-24.9995	0.750005
PP / VP	O88321	O88321	-0.0111536	0.0111536	0.0281633	0.418071	48	O88321	Psmd4	Antisecretory factor	O88321_RAT	10	-0.770125	0.992299
PP / VP	A0A0G2JXP4;D3ZY86	A0A0G2JXP4;D3ZY86	NaN	NaN	0.0280508	0.418071	4	A0A0G2JXP4;D3ZY86	Tango2	Transport and golgi organization 2 homolog;Similar to Ser/Thr-rich protein T10 in DGCR region (Predicted), isoform CRA_a	A0A0G2JXP4_RAT;D3ZY86_RAT	1	NaN	NaN	PP	VP	NaN	NaN	NaN
PP / VP	Q5FVI4	Q5FVI4	NaN	NaN	0.0287731	0.418071	4	Q5FVI4	Cend1	Cell cycle exit and neuronal differentiation protein 1	CEND_RAT	1	NaN	NaN	PP	VP	NaN	NaN	NaN
PP / VP	D4A8A0	D4A8A0	0.197113	0.197113	0.0289775	0.418105	48	D4A8A0	Cad	Carbamoyl-phosphate synthetase 2, aspartate transcarbamylase, and dihydroorotase	D4A8A0_RAT	12	14.6402	1.1464
PP / VP	G3V7N5	G3V7N5	0.10731	0.10731	0.0291326	0.418474	32	G3V7N5	Cpt2	Carnitine O-palmitoyltransferase 2, mitochondrial	G3V7N5_RAT	8	7.72175	1.07722
PP / VP	Q75Q39	Q75Q39	-0.206311	0.206311	0.0292658	0.418527	68	Q75Q39	Tomm70	Mitochondrial import receptor subunit TOM70	TOM70_RAT	14	-13.3249	0.866751
PP / VP	F1LZY6;M0R816	F1LZY6;M0R816	NaN	NaN	0.0297769	0.423961	4	F1LZY6;M0R816	NaN	Uncharacterized protein	F1LZY6_RAT;M0R816_RAT	1	NaN	NaN	PP	VP	NaN	NaN	NaN
PP / VP	A0A0G2K714;Q6AYE2	A0A0G2K714;Q6AYE2	0.179075	0.179075	0.0304141	0.425534	28	A0A0G2K714;Q6AYE2	Sh3glb1	Endophilin-B1	A0A0G2K714_RAT;SHLB1_RAT	7	13.2157	1.13216
PP / VP	A0A0H2UHL2;P28492	A0A0H2UHL2;P28492	0.866556	0.866556	0.0301693	0.425534	8	A0A0H2UHL2;P28492	Gls2	Glutaminase liver isoform, mitochondrial;Glutaminase liver isoform, mitochondrial	A0A0H2UHL2_RAT;GLSL_RAT	2	82.3305	1.8233
PP / VP	A0A0G2JSJ8;P17164	A0A0G2JSJ8;P17164	0.454348	0.454348	0.0303605	0.425534	16	A0A0G2JSJ8;P17164	Fuca1	Alpha-L-fucosidase;Tissue alpha-L-fucosidase	A0A0G2JSJ8_RAT;FUCO_RAT	5	37.0163	1.37016
PP / VP	Q9QYU2	Q9QYU2	-1.01907	1.01907	0.0302621	0.425534	12	Q9QYU2	Tsfm	Elongation factor Ts, mitochondrial	EFTS_RAT	3	-50.6565	0.493435
PP / VP	P30835	P30835	0.10516	0.10516	0.0306029	0.426329	56	P30835	Pfkl	ATP-dependent 6-phosphofructokinase, liver type	PFKAL_RAT	13	7.56137	1.07561
PP / VP	F1M3D3	F1M3D3	0.0267554	0.0267554	0.0313069	0.428745	124	F1M3D3	Hnrnpm	Heterogeneous nuclear ribonucleoprotein M	F1M3D3_RAT	23	1.87185	1.01872
PP / VP	D3ZP47	D3ZP47	-0.421154	0.421154	0.0312483	0.428745	28	D3ZP47	Phpt1	Phosphohistidine phosphatase 1	D3ZP47_RAT	4	-25.3173	0.746827
PP / VP	A0A096MJW2;A0A0H2UHL1;Q66H50	A0A096MJW2;A0A0H2UHL1;Q66H50	0.223155	0.223155	0.0310653	0.428745	16	A0A096MJW2;A0A0H2UHL1;Q66H50	Far1	Fatty acyl-CoA reductase;Fatty acyl-CoA reductase;Fatty acyl-CoA reductase 1	A0A096MJW2_RAT;A0A0H2UHL1_RAT;FACR1_RAT	4	16.7283	1.16728
PP / VP	A0A0G2JTH7;F1M7B8	A0A0G2JTH7;F1M7B8	0.75351	0.75351	0.0312255	0.428745	8	A0A0G2JTH7;F1M7B8	Ube3a	Ubiquitin protein ligase E3A	A0A0G2JTH7_RAT;F1M7B8_RAT	2	68.5889	1.68589
PP / VP	F1LM55	F1LM55	0.236193	0.236193	0.0319158	0.431598	44	F1LM55	Ccar2	Cell cycle and apoptosis regulator 2	F1LM55_RAT	11	17.788	1.17788
PP / VP	G3V7I3	G3V7I3	0.228057	0.228057	0.0319037	0.431598	24	G3V7I3	Atp13a1	Cation-transporting ATPase	G3V7I3_RAT	6	17.1257	1.17126
PP / VP	A0A0H2UHX5;P07861	A0A0H2UHX5;P07861	0.928157	0.928157	0.0319081	0.431598	8	A0A0H2UHX5;P07861	Mme	Neprilysin	A0A0H2UHX5_RAT;NEP_RAT	2	90.2844	1.90284
PP / VP	A0A0G2K4C6;F1M5N4	A0A0G2K4C6;F1M5N4	NaN	NaN	0.0322642	0.434491	4	A0A0G2K4C6;F1M5N4	Me3	Malic enzyme	A0A0G2K4C6_RAT;F1M5N4_RAT	1	NaN	NaN	PP	VP	NaN	NaN	NaN
PP / VP	A0A0G2K1B5;G3V9Q2;P49797	A0A0G2K1B5;G3V9Q2;P49797	0.219726	0.219726	0.0331105	0.437436	28	A0A0G2K1B5;G3V9Q2;P49797	Rgs3	Regulator of G-protein-signaling 3;Regulator of G-protein signalling 3, isoform CRA_c;Regulator of G-protein signaling 3	A0A0G2K1B5_RAT;G3V9Q2_RAT;RGS3_RAT	6	16.4512	1.16451
PP / VP	A0A0G2K5A4;D3ZLD5	A0A0G2K5A4;D3ZLD5	0.0295054	0.0295054	0.0330869	0.437436	52	A0A0G2K5A4;D3ZLD5	;Golga3	Uncharacterized protein;Golgin A3	A0A0G2K5A4_RAT;D3ZLD5_RAT	10	2.06622	1.02066
PP / VP	D3ZUV3	D3ZUV3	0.256498	0.256498	0.0328842	0.437436	24	D3ZUV3	Eif2a	Eukaryotic translation initiation factor 2A	D3ZUV3_RAT	6	19.4576	1.19458
PP / VP	Q6AXU4	Q6AXU4	-1.20866	1.20866	0.0331596	0.437436	8	Q6AXU4	Rnf181	E3 ubiquitin-protein ligase RNF181	RN181_RAT	2	-56.7331	0.432669
PP / VP	Q3B8R7	Q3B8R7	NaN	NaN	0.0330779	0.437436	8	Q3B8R7	Mrpl47	Mitochondrial ribosomal protein L47	Q3B8R7_RAT	1	NaN	NaN	PP	VP	NaN	NaN	NaN
PP / VP	M0RC57	M0RC57	-0.0283275	0.0283275	0.0346442	0.453583	20	M0RC57	Smap1	Small ArfGAP 1	M0RC57_RAT	4	-1.94436	0.980556
PP / VP	O88637	O88637	-0.892933	0.892933	0.0346643	0.453583	16	O88637	Pcyt2	Ethanolamine-phosphate cytidylyltransferase	PCY2_RAT	4	-46.1482	0.538518
PP / VP	A0A0G2K2G7;D4AC12	A0A0G2K2G7;D4AC12	-0.121003	0.121003	0.0348126	0.453687	12	A0A0G2K2G7;D4AC12	Anks1a	Ankyrin repeat and sterile alpha motif domain-containing 1A;Ankyrin repeat and SAM domain containing 1 (Predicted)	A0A0G2K2G7_RAT;D4AC12_RAT	3	-8.04516	0.919548
PP / VP	G3V912	G3V912	0.111338	0.111338	0.0350584	0.455055	28	G3V912	Tmx4	Thioredoxin domain containing 13	G3V912_RAT	7	8.02294	1.08023
PP / VP	M0R7R2	M0R7R2	NaN	NaN	0.0352281	0.455429	4	M0R7R2	LOC683897	Similar to Protein C6orf203	M0R7R2_RAT	1	NaN	NaN	PP	VP	NaN	NaN	NaN
PP / VP	Q6AY20	Q6AY20	0.114785	0.114785	0.0355855	0.455557	32	Q6AY20	M6pr	Cation-dependent mannose-6-phosphate receptor	MPRD_RAT	5	8.28139	1.08281
PP / VP	D4A3E0	D4A3E0	0.376568	0.376568	0.0358856	0.455557	16	D4A3E0	Mmrn1	Multimerin 1	D4A3E0_RAT	4	29.8249	1.29825
PP / VP	Q8K3P6	Q8K3P6	0.363546	0.363546	0.0358154	0.455557	24	Q8K3P6	Slc25a25	Calcium-binding mitochondrial carrier protein SCaMC-2	SCMC2_RAT	5	28.6584	1.28658
PP / VP	E9PSS1;Q5MPA9	E9PSS1;Q5MPA9	-0.114268	0.114268	0.0358851	0.455557	40	E9PSS1;Q5MPA9	Dclk2	Serine/threonine-protein kinase DCLK2	E9PSS1_RAT;DCLK2_RAT	9	-7.61493	0.923851
PP / VP	O35820	O35820	NaN	NaN	0.0359427	0.455557	4	O35820	Dnph1	2'-deoxynucleoside 5'-phosphate N-hydrolase 1	DNPH1_RAT	1	NaN	NaN	PP	VP	NaN	NaN	NaN
PP / VP	P07340	P07340	0.017138	0.017138	0.0368684	0.456707	55	P07340	Atp1b1	Sodium/potassium-transporting ATPase subunit beta-1	AT1B1_RAT	11	1.195	1.01195
PP / VP	D3ZH41	D3ZH41	0.133148	0.133148	0.0372534	0.456707	52	D3ZH41	Ckap4	Cytoskeleton-associated protein 4	D3ZH41_RAT	11	9.66843	1.09668
PP / VP	Q4QRB4	Q4QRB4	-0.0488308	0.0488308	0.0374466	0.456707	94	Q4QRB4	Tubb3	Tubulin beta-3 chain	TBB3_RAT	13	-3.32805	0.966719
PP / VP	A0A0G2JT63	A0A0G2JT63	-0.54837	0.54837	0.0362954	0.456707	8	A0A0G2JT63	Cyfip2	Cytoplasmic FMR1-interacting protein 2	A0A0G2JT63_RAT	2	-31.6208	0.683792
PP / VP	Q9WVK7	Q9WVK7	0.0630758	0.0630758	0.0373688	0.456707	40	Q9WVK7	Hadh	Hydroxyacyl-coenzyme A dehydrogenase, mitochondrial	HCDH_RAT	8	4.46906	1.04469
PP / VP	A0A096MKC0	A0A096MKC0	NaN	NaN	0.0370036	0.456707	4	A0A096MKC0	Gigyf2	Uncharacterized protein (Fragment)	A0A096MKC0_RAT	1	NaN	NaN	PP	VP	NaN	NaN	NaN
PP / VP	P19944	P19944	0.49049	0.49049	0.0368048	0.456707	12	P19944	Rplp1	60S acidic ribosomal protein P1	RLA1_RAT	3	40.4922	1.40492
PP / VP	Q68FR2	Q68FR2	-0.0709547	0.0709547	0.0370114	0.456707	12	Q68FR2	Bin2	Bridging integrator 2	BIN2_RAT	3	-4.79922	0.952008
PP / VP	F1LPP1;F1M0S5;F1M2D6;O55207	F1LPP1;F1M0S5;F1M2D6;O55207	NaN	NaN	0.0367174	0.456707	4	F1LPP1;F1M0S5;F1M2D6;O55207	Synj2	Synaptojanin-2	F1LPP1_RAT;F1M0S5_RAT;F1M2D6_RAT;SYNJ2_RAT	1	NaN	NaN	PP	VP	NaN	NaN	NaN
PP / VP	A0A0G2JW36;P18645;Q4QRB0	A0A0G2JW36;P18645;Q4QRB0	-0.258065	0.258065	0.0380775	0.462656	24	A0A0G2JW36;P18645;Q4QRB0	Gale	UDP-glucose 4-epimerase;UDP-glucose 4-epimerase;Galactose-4-epimerase, UDP, isoform CRA_a	A0A0G2JW36_RAT;GALE_RAT;Q4QRB0_RAT	5	-16.3791	0.836209
PP / VP	A0A0G2K872;Q1WIM3	A0A0G2K872;Q1WIM3	-0.054883	0.054883	0.0384389	0.463658	56	A0A0G2K872;Q1WIM3	Cadm3	Cell adhesion molecule 3	A0A0G2K872_RAT;CADM3_RAT	9	-3.73275	0.962672
PP / VP	P41562	P41562	-0.0292734	0.0292734	0.0387325	0.463658	88	P41562	Idh1	Isocitrate dehydrogenase [NADP] cytoplasmic	IDHC_RAT	17	-2.00863	0.979914
PP / VP	P45479	P45479	0.115347	0.115347	0.038554	0.463658	28	P45479	Ppt1	Palmitoyl-protein thioesterase 1	PPT1_RAT	5	8.32356	1.08324
PP / VP	Q6AZ50	Q6AZ50	0.264341	0.264341	0.0387338	0.463658	28	Q6AZ50	Atg3	Ubiquitin-like-conjugating enzyme ATG3	ATG3_RAT	6	20.1087	1.20109
PP / VP	Q5BJX4	Q5BJX4	NaN	NaN	0.0390894	0.466188	4	Q5BJX4	Snx10	Sorting nexin 10	Q5BJX4_RAT	1	NaN	NaN	PP	VP	NaN	NaN	NaN
PP / VP	D4A0L4;F1MA18;Q62764	D4A0L4;F1MA18;Q62764	-0.223746	0.223746	0.0394253	0.468465	20	D4A0L4;F1MA18;Q62764	Ybx3	Y-box-binding protein 3	D4A0L4_RAT;F1MA18_RAT;YBOX3_RAT	4	-14.3661	0.856339
PP / VP	P07632	P07632	-0.101803	0.101803	0.0398392	0.468729	48	P07632	Sod1	Superoxide dismutase [Cu-Zn]	SODC_RAT	6	-6.81325	0.931868
PP / VP	Q5M819	Q5M819	-0.301649	0.301649	0.0400276	0.468729	20	Q5M819	Psph	Phosphoserine phosphatase	SERB_RAT	5	-18.8675	0.811325
PP / VP	F1LWE6	F1LWE6	0.100558	0.100558	0.0399524	0.468729	16	F1LWE6	Msi2	Musashi RNA-binding protein 2	F1LWE6_RAT	4	7.21879	1.07219
PP / VP	G3V8R0	G3V8R0	NaN	NaN	0.0397312	0.468729	4	G3V8R0	RGD1311703	Similar to sid2057p	G3V8R0_RAT	1	NaN	NaN	PP	VP	NaN	NaN	NaN
PP / VP	B4F763;D3ZPE5	B4F763;D3ZPE5	0.210029	0.210029	0.0401911	0.468944	28	B4F763;D3ZPE5	Vps53	VPS53 subunit of GARP complex	B4F763_RAT;D3ZPE5_RAT	7	15.6712	1.15671
PP / VP	Q6NYB7	Q6NYB7	0.124504	0.124504	0.0410015	0.474971	36	Q6NYB7	Rab1A	Ras-related protein Rab-1A	RAB1A_RAT	6	9.01329	1.09013
PP / VP	Q68G33	Q68G33	0.173406	0.173406	0.0409418	0.474971	32	Q68G33	Gorasp2	Golgi reassembly-stacking protein 2	Q68G33_RAT	7	12.7718	1.12772
PP / VP	Q5XHZ8	Q5XHZ8	0.202299	0.202299	0.0437031	0.475584	24	Q5XHZ8	Cog3	Component of oligomeric golgi complex 3	Q5XHZ8_RAT	6	15.053	1.15053
PP / VP	Q4G075	Q4G075	0.182235	0.182235	0.0414345	0.475584	72	Q4G075	Serpinb1a	Leukocyte elastase inhibitor A	ILEUA_RAT	13	13.464	1.13464
PP / VP	P62909	P62909	-0.0159045	0.0159045	0.0429769	0.475584	96	P62909	Rps3	40S ribosomal protein S3	RS3_RAT	16	-1.09636	0.989036
PP / VP	P42123	P42123	-0.0997221	0.0997221	0.0421866	0.475584	120	P42123	Ldhb	L-lactate dehydrogenase B chain	LDHB_RAT	17	-6.67873	0.933213
PP / VP	Q68FX0	Q68FX0	0.0669689	0.0669689	0.0426569	0.475584	104	Q68FX0	Idh3B	Isocitrate dehydrogenase [NAD] subunit beta, mitochondrial	IDH3B_RAT	16	4.75135	1.04751
PP / VP	Q5BJP4	Q5BJP4	0.179024	0.179024	0.0412041	0.475584	36	Q5BJP4	Rbm39	RNA-binding motif protein 39	Q5BJP4_RAT	9	13.2117	1.13212
PP / VP	Q63377	Q63377	-0.0793223	0.0793223	0.0426978	0.475584	64	Q63377	Atp1b3	Sodium/potassium-transporting ATPase subunit beta-3	AT1B3_RAT	10	-5.34978	0.946502
PP / VP	A0A140TAF0	A0A140TAF0	0.126549	0.126549	0.0423462	0.475584	24	A0A140TAF0	Tpm3	RCG62531, isoform CRA_g	A0A140TAF0_RAT	5	9.16792	1.09168
PP / VP	D3ZUC9	D3ZUC9	0.0956753	0.0956753	0.0417166	0.475584	44	D3ZUC9	Oxsr1	Oxidative stress-responsive kinase 1	D3ZUC9_RAT	9	6.85654	1.06857
PP / VP	Q6AYS8	Q6AYS8	-0.233383	0.233383	0.0436281	0.475584	68	Q6AYS8	Hsd17b11	Estradiol 17-beta-dehydrogenase 11	DHB11_RAT	12	-14.9362	0.850638
PP / VP	Q498E0	Q498E0	-0.214648	0.214648	0.0435155	0.475584	20	Q498E0	Txndc12	Thioredoxin domain-containing protein 12	TXD12_RAT	4	-13.8244	0.861756
PP / VP	Q5PPL3	Q5PPL3	-0.204948	0.204948	0.0426555	0.475584	48	Q5PPL3	Nsdhl	Sterol-4-alpha-carboxylate 3-dehydrogenase, decarboxylating	NSDHL_RAT	11	-13.243	0.86757
PP / VP	D3ZZR5	D3ZZR5	-0.301881	0.301881	0.0432848	0.475584	16	D3ZZR5	Snrpa1	Small nuclear ribonucleoprotein polypeptide A'	D3ZZR5_RAT	3	-18.8806	0.811194
PP / VP	F1LMA7;Q4TU93	F1LMA7;Q4TU93	0.248394	0.248394	0.0422573	0.475584	20	F1LMA7;Q4TU93	Mrc2	C-type mannose receptor 2	F1LMA7_RAT;MRC2_RAT	5	18.7884	1.18788
PP / VP	P19633	P19633	0.426629	0.426629	0.0434021	0.475584	16	P19633	Casq1	Calsequestrin-1	CASQ1_RAT	4	34.4089	1.34409
PP / VP	Q68FT1	Q68FT1	-0.802191	0.802191	0.0419812	0.475584	8	Q68FT1	Coq9	Ubiquinone biosynthesis protein COQ9, mitochondrial	COQ9_RAT	2	-42.6523	0.573477
PP / VP	B1WC25	B1WC25	0.745924	0.745924	0.0432942	0.475584	8	B1WC25	Tra2a	Tra2a protein	B1WC25_RAT	2	67.7048	1.67705
PP / VP	D3ZE59	D3ZE59	NaN	NaN	0.0422057	0.475584	4	D3ZE59	Tmem115	Transmembrane protein 115	D3ZE59_RAT	1	NaN	NaN	PP	VP	NaN	NaN	NaN
PP / VP	A0A0G2K3V4;G3V6F4;P56558	A0A0G2K3V4;G3V6F4;P56558	0.206143	0.206143	0.044077	0.476295	24	A0A0G2K3V4;G3V6F4;P56558	Ogt	O-linked N-acetylglucosamine (GlcNAc) transferase (UDP-N-acetylglucosamine:polypeptide-N-acetylglucosaminyl transferase), isoform CRA_a;O-linked N-acetylglucosamine (GlcNAc) transferase (UDP-N-acetylglucosamine:polypeptide-N-acetylglucosaminyl transferase), isoform CRA_b;UDP-N-acetylglucosamine--peptide N-acetylglucosaminyltransferase 110 kDa subunit	A0A0G2K3V4_RAT;G3V6F4_RAT;OGT1_RAT	6	15.36	1.1536
PP / VP	Q9JMI1	Q9JMI1	0.0593622	0.0593622	0.0443491	0.476295	44	Q9JMI1	Aacs	Acetoacetyl-CoA synthetase	AACS_RAT	11	4.2005	1.04201
PP / VP	P54001	P54001	-0.267275	0.267275	0.0440331	0.476295	40	P54001	P4ha1	Prolyl 4-hydroxylase subunit alpha-1	P4HA1_RAT	8	-16.9113	0.830887
PP / VP	Q5I0K3	Q5I0K3	0.633465	0.633465	0.0443579	0.476295	20	Q5I0K3	Clybl	Citramalyl-CoA lyase, mitochondrial	CLYBL_RAT	4	55.1287	1.55129
PP / VP	D4A1Q9	D4A1Q9	0.256756	0.256756	0.0447001	0.476801	32	D4A1Q9	Ttll12	Tubulin tyrosine ligase-like 12	D4A1Q9_RAT	8	19.4789	1.19479
PP / VP	Q6P6S4	Q6P6S4	0.474864	0.474864	0.0446675	0.476801	12	Q6P6S4	Sil1	Nucleotide exchange factor SIL1	SIL1_RAT	3	38.9787	1.38979
PP / VP	P29067	P29067	0.471559	0.471559	0.0459107	0.478792	20	P29067	Arrb2	Beta-arrestin-2	ARRB2_RAT	4	38.6607	1.38661
PP / VP	Q8CFN2	Q8CFN2	-0.110208	0.110208	0.0453281	0.478792	40	Q8CFN2	Cdc42	Cell division control protein 42 homolog	CDC42_RAT	7	-7.35456	0.926454
PP / VP	A0A0G2JU07;Q7M767	A0A0G2JU07;Q7M767	0.118748	0.118748	0.0462085	0.478792	32	A0A0G2JU07;Q7M767	Ube2v2	Ubiquitin-conjugating enzyme E2 variant 2	A0A0G2JU07_RAT;UB2V2_RAT	7	8.57925	1.08579
PP / VP	A0A0G2JW51;Q5BJS0	A0A0G2JW51;Q5BJS0	0.110908	0.110908	0.0455275	0.478792	80	A0A0G2JW51;Q5BJS0	Dhx30	ATP-dependent RNA helicase DHX30	A0A0G2JW51_RAT;DHX30_RAT	20	7.99077	1.07991
PP / VP	P20788	P20788	-0.049226	0.049226	0.0462628	0.478792	48	P20788	Uqcrfs1	Cytochrome b-c1 complex subunit Rieske, mitochondrial	UCRI_RAT	7	-3.35453	0.966455
PP / VP	A0A0G2JW85;Q9QYJ2	A0A0G2JW85;Q9QYJ2	0.186845	0.186845	0.0458313	0.478792	20	A0A0G2JW85;Q9QYJ2	Rasa3	Ras GTPase-activating protein 3	A0A0G2JW85_RAT;RASA3_RAT	5	13.8272	1.13827
PP / VP	Q9EQX9	Q9EQX9	-0.0748701	0.0748701	0.0456136	0.478792	36	Q9EQX9	Ube2n	Ubiquitin-conjugating enzyme E2 N	UBE2N_RAT	7	-5.05724	0.949428
PP / VP	A0A0U1RRV7;Q0ZFS8	A0A0U1RRV7;Q0ZFS8	0.198775	0.198775	0.0459521	0.478792	8	A0A0U1RRV7;Q0ZFS8	Srsf3	RCG61099, isoform CRA_b;RCG61099, isoform CRA_c	A0A0U1RRV7_RAT;Q0ZFS8_RAT	2	14.7723	1.14772
PP / VP	O54861	O54861	-0.455155	0.455155	0.0463681	0.478792	12	O54861	Sort1	Sortilin	SORT_RAT	3	-27.0568	0.729432
PP / VP	P11661	P11661	0.231989	0.231989	0.0455024	0.478792	12	P11661	Mtnd5	NADH-ubiquinone oxidoreductase chain 5	NU5M_RAT	2	17.4453	1.17445
PP / VP	D3ZLA3	D3ZLA3	-0.0987434	0.0987434	0.0467863	0.480042	68	D3ZLA3	Cpne3	Copine 3	D3ZLA3_RAT	15	-6.6154	0.933846
PP / VP	Q5QT56	Q5QT56	-1.9194	1.9194	0.0467353	0.480042	8	Q5QT56	Cldn19	Claudin-19	CLD19_RAT	2	-73.5636	0.264364
PP / VP	P18614	P18614	0.296897	0.296897	0.0472452	0.483217	28	P18614	Itga1	Integrin alpha-1	ITA1_RAT	7	22.8499	1.2285
PP / VP	P62718	P62718	-0.0415037	0.0415037	0.0479825	0.483644	28	P62718	Rpl18a	60S ribosomal protein L18a	RL18A_RAT	6	-2.83583	0.971642
PP / VP	Q68FR6	Q68FR6	0.0372449	0.0372449	0.0480351	0.483644	136	Q68FR6	Eef1g	Elongation factor 1-gamma	EF1G_RAT	20	2.61523	1.02615
PP / VP	A0A0G2JXZ3	A0A0G2JXZ3	NaN	NaN	0.0478207	0.483644	4	A0A0G2JXZ3	Atrx	Transcriptional regulator ATRX	A0A0G2JXZ3_RAT	1	NaN	NaN	PP	VP	NaN	NaN	NaN
PP / VP	A0A0G2KA82;Q66H18	A0A0G2KA82;Q66H18	NaN	NaN	0.047631	0.483644	4	A0A0G2KA82;Q66H18	Sypl1	Synaptophysin-like 1	A0A0G2KA82_RAT;Q66H18_RAT	1	NaN	NaN	PP	VP	NaN	NaN	NaN
PP / VP	Q6P9V1	Q6P9V1	-0.158167	0.158167	0.0476404	0.483644	24	Q6P9V1	Cd81	Tetraspanin	Q6P9V1_RAT	3	-10.3837	0.896163
PP / VP	P62083	P62083	0.461576	0.461576	0.0485402	0.484455	56	P62083	Rps7	40S ribosomal protein S7	RS7_RAT	9	37.7046	1.37705
PP / VP	P86182	P86182	0.187093	0.187093	0.0484081	0.484455	24	P86182	Ccdc22	Coiled-coil domain-containing protein 22	CCD22_RAT	6	13.8467	1.13847
PP / VP	D3Z9K4	D3Z9K4	NaN	NaN	0.0485654	0.484455	4	D3Z9K4	Plekho2	Pleckstrin homology domain-containing O2	D3Z9K4_RAT	1	NaN	NaN	PP	VP	NaN	NaN	NaN
PP / VP	P97675	P97675	0.66169	0.66169	0.0493318	0.485065	48	P97675	Enpp3	Ectonucleotide pyrophosphatase/phosphodiesterase family member 3	ENPP3_RAT	10	58.1935	1.58194
PP / VP	P12711	P12711	-0.0245342	0.0245342	0.048945	0.485065	52	P12711	Adh5	Alcohol dehydrogenase class-3	ADHX_RAT	10	-1.6862	0.983138
PP / VP	A0A0H2UHQ1;F1LZX7;P24049	A0A0H2UHQ1;F1LZX7;P24049	0.0194114	0.0194114	0.0487872	0.485065	68	A0A0H2UHQ1;F1LZX7;P24049	Rpl17	60S ribosomal protein L17	A0A0H2UHQ1_RAT;F1LZX7_RAT;RL17_RAT	10	1.35459	1.01355
PP / VP	A0A0G2JSR0;Q9R1Z0	A0A0G2JSR0;Q9R1Z0	0.0939326	0.0939326	0.049377	0.485065	64	A0A0G2JSR0;Q9R1Z0	Vdac3	Voltage-dependent anion-selective channel protein 3	A0A0G2JSR0_RAT;VDAC3_RAT	12	6.72755	1.06728
PP / VP	D3ZI16	D3ZI16	0.0662251	0.0662251	0.0492	0.485065	48	D3ZI16	Cops6	COP9 (Constitutive photomorphogenic) homolog, subunit 6 (Arabidopsis thaliana) (Predicted), isoform CRA_a	D3ZI16_RAT	10	4.69736	1.04697
PP / VP	P62193	P62193	0.0114961	0.0114961	0.0503713	0.485336	88	P62193	Psmc1	26S proteasome regulatory subunit 4	PRS4_RAT	17	0.800033	1.008
PP / VP	A0A0G2JSW6;A0A0G2KAY2	A0A0G2JSW6;A0A0G2KAY2	1.3029	1.3029	0.0525807	0.485336	16	A0A0G2JSW6;A0A0G2KAY2	Tnnt3	Troponin T, fast skeletal muscle;Troponin T, fast skeletal muscle	A0A0G2JSW6_RAT;A0A0G2KAY2_RAT	4	146.725	2.46725
PP / VP	A0A0G2K3B2;F8WFN1;Q1H5H1	A0A0G2K3B2;F8WFN1;Q1H5H1	-0.540311	0.540311	0.0528639	0.485336	12	A0A0G2K3B2;F8WFN1;Q1H5H1	Selenot	Selenoprotein T;Selenoprotein T;Thioredoxin reductase-like selenoprotein T	A0A0G2K3B2_RAT;F8WFN1_RAT;SELT_RAT	2	-31.2377	0.687623
PP / VP	A0A0G2K3S4	A0A0G2K3S4	-0.0319222	0.0319222	0.0507319	0.485336	74	A0A0G2K3S4	Abca9	ATP-binding cassette subfamily A member 9	A0A0G2K3S4_RAT	17	-2.18838	0.978116
PP / VP	Q5RKI0	Q5RKI0	-0.130398	0.130398	0.0519277	0.485336	132	Q5RKI0	Wdr1	WD repeat-containing protein 1	WDR1_RAT	22	-8.64205	0.91358
PP / VP	P41123	P41123	-0.0525659	0.0525659	0.0508462	0.485336	44	P41123	Rpl13	60S ribosomal protein L13	RL13_RAT	6	-3.57801	0.96422
PP / VP	Q09073	Q09073	0.101853	0.101853	0.0535242	0.485336	104	Q09073	Slc25a5	ADP/ATP translocase 2	ADT2_RAT	15	7.31507	1.07315
PP / VP	Q5XIH3	Q5XIH3	0.0404445	0.0404445	0.0510019	0.485336	108	Q5XIH3	Ndufv1	NADH dehydrogenase [ubiquinone] flavoprotein 1, mitochondrial	Q5XIH3_RAT	20	2.84307	1.02843
PP / VP	B2RYS2	B2RYS2	-0.017057	0.017057	0.049835	0.485336	28	B2RYS2	Uqcrb	Cytochrome b-c1 complex subunit 7	B2RYS2_RAT	5	-1.17534	0.988247
PP / VP	Q5XIM9	Q5XIM9	0.0713854	0.0713854	0.0537593	0.485336	180	Q5XIM9	Cct2	T-complex protein 1 subunit beta	TCPB_RAT	30	5.07252	1.05073
PP / VP	A0A0H2UHE5;P20650	A0A0H2UHE5;P20650	-0.0978053	0.0978053	0.0536098	0.485336	60	A0A0H2UHE5;P20650	Ppm1a	Protein phosphatase 1A	A0A0H2UHE5_RAT;PPM1A_RAT	12	-6.55465	0.934453
PP / VP	B1H2A6	B1H2A6	0.170968	0.170968	0.0534231	0.485336	88	B1H2A6	Fxr2	FMR1 autosomal homolog 2	B1H2A6_RAT	18	12.5814	1.12581
PP / VP	D3ZI07	D3ZI07	-0.555793	0.555793	0.0515208	0.485336	12	D3ZI07	Kif3b	Kinesin-like protein	D3ZI07_RAT	3	-31.9717	0.680283
PP / VP	P51886	P51886	-0.00531222	0.00531222	0.0536226	0.485336	60	P51886	Lum	Lumican	LUM_RAT	9	-0.367538	0.996325
PP / VP	Q6AYC4	Q6AYC4	0.321729	0.321729	0.0503173	0.485336	88	Q6AYC4	Capg	Macrophage-capping protein	CAPG_RAT	12	24.9828	1.24983
PP / VP	Q6IRE4	Q6IRE4	0.0101527	0.0101527	0.0530407	0.485336	24	Q6IRE4	Tsg101	Tumor susceptibility gene 101 protein	TS101_RAT	5	0.706213	1.00706
PP / VP	A0A0G2JY08	A0A0G2JY08	0.0799154	0.0799154	0.0536881	0.485336	144	A0A0G2JY08	Myo18a	Myosin XVIIIa	A0A0G2JY08_RAT	35	5.6956	1.05696
PP / VP	A0A0G2K366	A0A0G2K366	-0.24792	0.24792	0.0534614	0.485336	24	A0A0G2K366	Rps6ka5	Ribosomal protein S6 kinase	A0A0G2K366_RAT	6	-15.789	0.84211
PP / VP	B2RYM3	B2RYM3	-0.0520371	0.0520371	0.0523617	0.485336	68	B2RYM3	Itih1	Inter-alpha trypsin inhibitor, heavy chain 1	B2RYM3_RAT	14	-3.54266	0.964573
PP / VP	F1M957	F1M957	0.0361581	0.0361581	0.0525823	0.485336	56	F1M957	Vwf	von Willebrand factor	F1M957_RAT	12	2.53796	1.02538
PP / VP	F8WG88;Q62632	F8WG88;Q62632	-0.149386	0.149386	0.0517134	0.485336	28	F8WG88;Q62632	Fstl1	Follistatin-related protein 1	F8WG88_RAT;FSTL1_RAT	6	-9.83656	0.901634
PP / VP	B2RYW7	B2RYW7	0.186111	0.186111	0.0536276	0.485336	16	B2RYW7	Srp14	RCG26543, isoform CRA_b	B2RYW7_RAT	4	13.7693	1.13769
PP / VP	A0A0G2K946	A0A0G2K946	0.273938	0.273938	0.053579	0.485336	28	A0A0G2K946	Spock2	SPARC/osteonectin, cwcv and kazal-like domains proteoglycan 2	A0A0G2K946_RAT	6	20.9103	1.2091
PP / VP	F1M8S4	F1M8S4	-0.589685	0.589685	0.051077	0.485336	8	F1M8S4	Usp35	Ubiquitin-specific peptidase 35	F1M8S4_RAT	2	-33.5512	0.664488
PP / VP	P0DMW0;P0DMW1	P0DMW0;P0DMW1	-0.0518469	0.0518469	0.052764	0.485336	40	P0DMW0;P0DMW1	Hspa1a;Hspa1b	Heat shock 70 kDa protein 1A;Heat shock 70 kDa protein 1B	HS71A_RAT;HS71B_RAT	9	-3.52995	0.964701
PP / VP	D3ZMY7	D3ZMY7	-0.429579	0.429579	0.051409	0.485336	16	D3ZMY7	Nt5c2	5'-nucleotidase, cytosolic II	D3ZMY7_RAT	4	-25.7522	0.742478
PP / VP	Q68FX1	Q68FX1	0.304047	0.304047	0.0505628	0.485336	28	Q68FX1	Mpi	Mannose-6-phosphate isomerase	MPI_RAT	7	23.4603	1.2346
PP / VP	Q5I034	Q5I034	NaN	NaN	0.0509911	0.485336	4	Q5I034	Custos	Protein CUSTOS	CSTOS_RAT	1	NaN	NaN	PP	VP	NaN	NaN	NaN
PP / VP	D3ZCD7;D3ZL21	D3ZCD7;D3ZL21	NaN	NaN	0.0506786	0.485336	4	D3ZCD7;D3ZL21	Tp53rk;LOC685619	RCG32142, isoform CRA_b;Similar to TP53-regulating kinase (p53-related protein kinase) (Nori-2)	D3ZCD7_RAT;D3ZL21_RAT	1	NaN	NaN	PP	VP	NaN	NaN	NaN
PP / VP	D3ZW55	D3ZW55	0.18348	0.18348	0.055346	0.485769	40	D3ZW55	Itpa	Inosine triphosphate pyrophosphatase	ITPA_RAT	7	13.562	1.13562
PP / VP	F1LUD3	F1LUD3	-0.13331	0.13331	0.0557528	0.485769	236	F1LUD3	NaN	Uncharacterized protein	F1LUD3_RAT	49	-8.82626	0.911737
PP / VP	P62997	P62997	0.249266	0.249266	0.0548571	0.485769	20	P62997	Tra2b	Transformer-2 protein homolog beta	TRA2B_RAT	5	18.8603	1.1886
PP / VP	P14668	P14668	-0.0351889	0.0351889	0.0549509	0.485769	140	P14668	Anxa5	Annexin A5	ANXA5_RAT	20	-2.4096	0.975904
PP / VP	P47853	P47853	-0.0818004	0.0818004	0.0543515	0.485769	80	P47853	Bgn	Biglycan	PGS1_RAT	13	-5.51222	0.944878
PP / VP	P18395	P18395	-0.0017928	0.0017928	0.0559267	0.485769	108	P18395	Csde1	Cold shock domain-containing protein E1	CSDE1_RAT	21	-0.12419	0.998758
PP / VP	A0A0G2JUC7;Q6AYH5	A0A0G2JUC7;Q6AYH5	-0.108896	0.108896	0.0557741	0.485769	100	A0A0G2JUC7;Q6AYH5	Dctn2	Dynactin subunit 2	A0A0G2JUC7_RAT;DCTN2_RAT	18	-7.27028	0.927297
PP / VP	D3ZLT1	D3ZLT1	0.254142	0.254142	0.0550181	0.485769	40	D3ZLT1	Ndufb7	NADH dehydrogenase (Ubiquinone) 1 beta subcomplex, 7 (Predicted)	D3ZLT1_RAT	8	19.2626	1.19263
PP / VP	P61203	P61203	0.137345	0.137345	0.0562615	0.485769	56	P61203	Cops2	COP9 signalosome complex subunit 2	CSN2_RAT	10	9.98791	1.09988
PP / VP	Q6P792;Q9WUH4	Q6P792;Q9WUH4	0.0347184	0.0347184	0.0565139	0.485769	64	Q6P792;Q9WUH4	Fhl1	Four and a half LIM domains 1;Four and a half LIM domains protein 1	Q6P792_RAT;FHL1_RAT	11	2.43569	1.02436
PP / VP	A0A0H2UHD9;Q5XIA1	A0A0H2UHD9;Q5XIA1	0.100265	0.100265	0.0569587	0.485769	44	A0A0H2UHD9;Q5XIA1	Ncln	Nicalin	A0A0H2UHD9_RAT;NCLN_RAT	8	7.19705	1.07197
PP / VP	Q66H98	Q66H98	0.137436	0.137436	0.0564439	0.485769	52	Q66H98	Cavin2	Caveolae-associated protein 2	CAVN2_RAT	10	9.99486	1.09995
PP / VP	F1LRE1	F1LRE1	0.126182	0.126182	0.0576652	0.485769	32	F1LRE1	Gsr	Glutathione reductase	F1LRE1_RAT	6	9.14014	1.0914
PP / VP	P24329	P24329	-0.0752092	0.0752092	0.0578655	0.485769	44	P24329	Tst	Thiosulfate sulfurtransferase	THTR_RAT	8	-5.07955	0.949204
PP / VP	Q6P7P5	Q6P7P5	0.158004	0.158004	0.0558501	0.485769	40	Q6P7P5	Bzw1	Basic leucine zipper and W2 domain-containing protein 1	BZW1_RAT	9	11.5742	1.11574
PP / VP	F1LP82	F1LP82	0.143986	0.143986	0.0577595	0.485769	72	F1LP82	Rab2a	Ras-related protein Rab-2A	F1LP82_RAT	13	10.4953	1.10495
PP / VP	D3ZHC4	D3ZHC4	-0.0544973	0.0544973	0.0574881	0.485769	28	D3ZHC4	Hebp2	Heme binding protein 2 (Predicted), isoform CRA_b	D3ZHC4_RAT	6	-3.70701	0.96293
PP / VP	P10499	P10499	-0.273207	0.273207	0.0567979	0.485769	28	P10499	Kcna1	Potassium voltage-gated channel subfamily A member 1	KCNA1_RAT	7	-17.2522	0.827478
PP / VP	A0A096MJN8;D3ZQ46	A0A096MJN8;D3ZQ46	-0.192983	0.192983	0.0576768	0.485769	12	A0A096MJN8;D3ZQ46	Cmtm5	CKLF-like MARVEL transmembrane domain-containing 5	A0A096MJN8_RAT;D3ZQ46_RAT	2	-12.5205	0.874795
PP / VP	F7ENH8	F7ENH8	0.142716	0.142716	0.0543647	0.485769	20	F7ENH8	Hdac2	Histone deacetylase	F7ENH8_RAT	4	10.3982	1.10398
PP / VP	D4A4J0	D4A4J0	0.162185	0.162185	0.0578195	0.485769	16	D4A4J0	Supt16h	SPT16 homolog, facilitates chromatin-remodeling subunit	D4A4J0_RAT	4	11.8981	1.11898
PP / VP	A0A0G2JTG4;A0A0G2JWF2;A0A0G2K7P6;F1M195;F1M1Q7;F1M1R0	A0A0G2JTG4;A0A0G2JWF2;A0A0G2K7P6;F1M195;F1M1Q7;F1M1R0	NaN	NaN	0.0578065	0.485769	4	A0A0G2JTG4;A0A0G2JWF2;A0A0G2K7P6;F1M195;F1M1Q7;F1M1R0	;;;;;LOC690813	Uncharacterized protein	A0A0G2JTG4_RAT;A0A0G2JWF2_RAT;A0A0G2K7P6_RAT;F1M195_RAT;F1M1Q7_RAT;F1M1R0_RAT	1	NaN	NaN	PP	VP	NaN	NaN	NaN
PP / VP	G3V6Z7	G3V6Z7	0.153762	0.153762	0.0575532	0.485769	44	G3V6Z7	Golga5	Golgi autoantigen, golgin subfamily a, 5, isoform CRA_a	G3V6Z7_RAT	9	11.2467	1.11247
PP / VP	D3ZSP1	D3ZSP1	0.226072	0.226072	0.0548397	0.485769	16	D3ZSP1	Snrpe	Small nuclear ribonucleoprotein E	D3ZSP1_RAT	3	16.9646	1.16965
PP / VP	A0A0G2KAT3	A0A0G2KAT3	0.705252	0.705252	0.0557097	0.485769	12	A0A0G2KAT3	Rpa1	Replication protein A subunit	A0A0G2KAT3_RAT	3	63.043	1.63043
PP / VP	A0A0G2JUT1;Q6AYP5	A0A0G2JUT1;Q6AYP5	0.152475	0.152475	0.0577046	0.485769	40	A0A0G2JUT1;Q6AYP5	Cadm1	Cell adhesion molecule 1	A0A0G2JUT1_RAT;CADM1_RAT	8	11.1475	1.11147
PP / VP	P68136	P68136	0.617125	0.617125	0.05409	0.485769	12	P68136	Acta1	Actin, alpha skeletal muscle	ACTS_RAT	2	53.3816	1.53382
PP / VP	F1M1L9	F1M1L9	0.366061	0.366061	0.0580716	0.486237	16	F1M1L9	Cpne2	Copine 2	F1M1L9_RAT	4	28.8829	1.28883
PP / VP	P53987	P53987	NaN	NaN	0.0582302	0.486305	4	P53987	Slc16a1	Monocarboxylate transporter 1	MOT1_RAT	1	NaN	NaN	PP	VP	NaN	NaN	NaN
PP / VP	A0A0G2JWH5;B4F7C9	A0A0G2JWH5;B4F7C9	-0.101308	0.101308	0.0592161	0.487039	48	A0A0G2JWH5;B4F7C9	Stt3a	STT3 oligosaccharyltransferase complex catalytic subunit A	A0A0G2JWH5_RAT;B4F7C9_RAT	10	-6.78127	0.932187
PP / VP	G3V7N0	G3V7N0	0.315217	0.315217	0.0598882	0.487039	24	G3V7N0	Hs2st1	Heparan sulfate 2-O-sulfotransferase 1	G3V7N0_RAT	6	24.4199	1.2442
PP / VP	O35828	O35828	-0.175472	0.175472	0.0589908	0.487039	64	O35828	Coro7	Coronin-7	CORO7_RAT	16	-11.4522	0.885478
PP / VP	G3V7G0;Q9QXU8	G3V7G0;Q9QXU8	-0.00856761	0.00856761	0.0599757	0.487039	88	G3V7G0;Q9QXU8	Dync1li1	Cytoplasmic dynein 1 light intermediate chain 1	G3V7G0_RAT;DC1L1_RAT	18	-0.592102	0.994079
PP / VP	F1LZF2;Q8R511;Z4YNH5	F1LZF2;Q8R511;Z4YNH5	-0.191792	0.191792	0.058938	0.487039	32	F1LZF2;Q8R511;Z4YNH5	Fnbp1	Formin-binding protein 1;Formin-binding protein 1;Formin-binding protein 1 (Fragment)	F1LZF2_RAT;FNBP1_RAT;Z4YNH5_RAT	7	-12.4483	0.875517
PP / VP	Q4FZS2	Q4FZS2	-0.127565	0.127565	0.0595694	0.487039	32	Q4FZS2	Bub3	BUB3 mitotic checkpoint protein	Q4FZS2_RAT	7	-8.46251	0.915375
PP / VP	Q5RKH6	Q5RKH6	-0.310197	0.310197	0.0591248	0.487039	28	Q5RKH6	Os9	Protein OS-9	OS9_RAT	6	-19.3468	0.806532
PP / VP	Q32PX2	Q32PX2	0.0228792	0.0228792	0.05952	0.487039	40	Q32PX2	Aimp2	Aminoacyl tRNA synthase complex-interacting multifunctional protein 2	AIMP2_RAT	7	1.59851	1.01599
PP / VP	G3V9M3	G3V9M3	NaN	NaN	0.0591102	0.487039	4	G3V9M3	Wdr47	RCG28460	G3V9M3_RAT	1	NaN	NaN	PP	VP	NaN	NaN	NaN
PP / VP	A0A0G2K7Y5;P97531	A0A0G2K7Y5;P97531	NaN	NaN	0.0596019	0.487039	4	A0A0G2K7Y5;P97531	Trip10	Cdc42-interacting protein 4	A0A0G2K7Y5_RAT;CIP4_RAT	1	NaN	NaN	PP	VP	NaN	NaN	NaN
PP / VP	F1M7Y3	F1M7Y3	NaN	NaN	0.0597029	0.487039	4	F1M7Y3	Rap1gds1	RAP1, GTP-GDP dissociation stimulator 1 (Predicted), isoform CRA_b	F1M7Y3_RAT	1	NaN	NaN	PP	VP	NaN	NaN	NaN
PP / VP	P16446	P16446	0.0690453	0.0690453	0.0603016	0.488458	64	P16446	Pitpna	Phosphatidylinositol transfer protein alpha isoform	PIPNA_RAT	13	4.90223	1.04902
PP / VP	P38918	P38918	0.51203	0.51203	0.0606611	0.490142	8	P38918	Akr7a3	Aflatoxin B1 aldehyde reductase member 3	ARK73_RAT	2	42.6055	1.42605
PP / VP	B2RZC6	B2RZC6	0.0281129	0.0281129	0.0608656	0.490143	52	B2RZC6	Ilf2	Ilf2 protein	B2RZC6_RAT	10	1.96775	1.01968
PP / VP	D4A8G0	D4A8G0	0.578676	0.578676	0.0609646	0.490143	8	D4A8G0	Lsm12	LSM12 homolog	D4A8G0_RAT	2	49.3478	1.49348
PP / VP	G3V8Y5	G3V8Y5	0.378236	0.378236	0.0613567	0.490413	16	G3V8Y5	Polr2b	DNA-directed RNA polymerase subunit beta	G3V8Y5_RAT	4	29.9752	1.29975
PP / VP	G3V8Q1	G3V8Q1	-0.154816	0.154816	0.0614533	0.490413	56	G3V8Q1	Cope	Coatomer subunit epsilon	G3V8Q1_RAT	12	-10.1753	0.898247
PP / VP	B5DFG6	B5DFG6	NaN	NaN	0.0612318	0.490413	4	B5DFG6	Car13	Car13 protein	B5DFG6_RAT	1	NaN	NaN	PP	VP	NaN	NaN	NaN
PP / VP	P60123	P60123	0.137627	0.137627	0.0632275	0.491008	68	P60123	Ruvbl1	RuvB-like 1	RUVB1_RAT	14	10.0094	1.10009
PP / VP	F8WFR6;O08730	F8WFR6;O08730	0.193234	0.193234	0.0620054	0.491008	48	F8WFR6;O08730	Gyg1	Glycogenin-1	F8WFR6_RAT;GLYG_RAT	8	14.3324	1.14332
PP / VP	Q6AY21	Q6AY21	-0.116024	0.116024	0.0631447	0.491008	84	Q6AY21	G3bp2	G3BP stress granule assembly factor 2	Q6AY21_RAT	10	-7.72732	0.922727
PP / VP	D4ACB8	D4ACB8	0.243416	0.243416	0.063351	0.491008	172	D4ACB8	Cct8	Chaperonin subunit 8 (Theta) (Predicted), isoform CRA_a	D4ACB8_RAT	30	18.3792	1.18379
PP / VP	D3ZBP4	D3ZBP4	0.137483	0.137483	0.0626921	0.491008	84	D3ZBP4	Mical1	[F-actin]-monooxygenase MICAL1	MICA1_RAT	19	9.99844	1.09998
PP / VP	A0A0H2UI20;F7FG31;Q9Z2F5	A0A0H2UI20;F7FG31;Q9Z2F5	0.198269	0.198269	0.062514	0.491008	36	A0A0H2UI20;F7FG31;Q9Z2F5	Ctbp1	C-terminal-binding protein 1	A0A0H2UI20_RAT;F7FG31_RAT;CTBP1_RAT	10	14.7321	1.14732
PP / VP	D3ZSW9	D3ZSW9	0.232817	0.232817	0.0623776	0.491008	8	D3ZSW9	LOC100910755	RUN and FYVE domain-containing 2	D3ZSW9_RAT	2	17.5128	1.17513
PP / VP	F1LU03	F1LU03	-0.352717	0.352717	0.0620459	0.491008	16	F1LU03	NaN	Uncharacterized protein	F1LU03_RAT	3	-21.6892	0.783108
PP / VP	D3ZF54	D3ZF54	0.124899	0.124899	0.0629424	0.491008	28	D3ZF54	Ano10	Anoctamin	D3ZF54_RAT	7	9.04311	1.09043
PP / VP	P54287	P54287	-0.0536566	0.0536566	0.0618563	0.491008	12	P54287	Cacnb3	Voltage-dependent L-type calcium channel subunit beta-3	CACB3_RAT	3	-3.65088	0.963491
PP / VP	P50123	P50123	0.334581	0.334581	0.0624101	0.491008	12	P50123	Enpep	Glutamyl aminopeptidase	AMPE_RAT	3	26.1011	1.26101
PP / VP	G3V6P8	G3V6P8	NaN	NaN	0.0631795	0.491008	8	G3V6P8	Gng12	Guanine nucleotide-binding protein subunit gamma	G3V6P8_RAT	1	NaN	NaN	PP	VP	NaN	NaN	NaN
PP / VP	P0C5X8	P0C5X8	NaN	NaN	0.0636507	0.492151	4	P0C5X8	Ttyh1	Protein tweety homolog 1	TTYH1_RAT	1	NaN	NaN	PP	VP	NaN	NaN	NaN
PP / VP	P11505	P11505	0.101431	0.101431	0.0648599	0.497317	128	P11505	Atp2b1	Plasma membrane calcium-transporting ATPase 1	AT2B1_RAT	24	7.28368	1.07284
PP / VP	B2RYD7	B2RYD7	-0.0810891	0.0810891	0.0650659	0.497317	36	B2RYD7	Stt3b	RCG25591, isoform CRA_a	B2RYD7_RAT	9	-5.46562	0.945344
PP / VP	A0A0G2K9P5	A0A0G2K9P5	0.292081	0.292081	0.0649505	0.497317	24	A0A0G2K9P5	Cog5	Component of oligomeric golgi complex 5	A0A0G2K9P5_RAT	6	22.4405	1.2244
PP / VP	B2GV01	B2GV01	-0.314003	0.314003	0.0648394	0.497317	12	B2GV01	Mta2	Metastasis-associated 1 family, member 2	B2GV01_RAT	3	-19.5593	0.804407
PP / VP	Q6MG85	Q6MG85	0.077432	0.077432	0.0650882	0.497317	16	Q6MG85	Agpat1	1-acyl-sn-glycerol-3-phosphate acyltransferase	Q6MG85_RAT	3	5.51382	1.05514
PP / VP	A0A0G2K6L6;A0A0H2UHG7;D3ZZK1;P60868	A0A0G2K6L6;A0A0H2UHG7;D3ZZK1;P60868	-0.200111	0.200111	0.0656359	0.500319	40	A0A0G2K6L6;A0A0H2UHG7;D3ZZK1;P60868	;Rps20;;Rps20	Uncharacterized protein;40S ribosomal protein S20;Uncharacterized protein;40S ribosomal protein S20	A0A0G2K6L6_RAT;A0A0H2UHG7_RAT;D3ZZK1_RAT;RS20_RAT	5	-12.9516	0.870484
PP / VP	G3V9P0;Q9WTV5	G3V9P0;Q9WTV5	-0.223705	0.223705	0.0659851	0.500717	28	G3V9P0;Q9WTV5	Psmd9	26S proteasome non-ATPase regulatory subunit 9	G3V9P0_RAT;PSMD9_RAT	6	-14.3636	0.856364
PP / VP	F1M1D5	F1M1D5	0.134274	0.134274	0.0661529	0.500717	48	F1M1D5	Tbcd	Tubulin folding cofactor D	F1M1D5_RAT	12	9.75405	1.09754
PP / VP	F1LSP0	F1LSP0	-0.591821	0.591821	0.0660744	0.500717	12	F1LSP0	Tmprss5	Transmembrane protease, serine 5 (Spinesin), isoform CRA_a	F1LSP0_RAT	3	-33.6495	0.663505
PP / VP	Q99ML5	Q99ML5	0.184259	0.184259	0.0671103	0.502243	112	Q99ML5	Pcyox1	Prenylcysteine oxidase	PCYOX_RAT	18	13.6233	1.13623
PP / VP	Q6AXQ0	Q6AXQ0	0.118315	0.118315	0.0667668	0.502243	52	Q6AXQ0	Sae1	SUMO-activating enzyme subunit 1	SAE1_RAT	11	8.54665	1.08547
PP / VP	P20673;Q4QRB8	P20673;Q4QRB8	0.145295	0.145295	0.0668281	0.502243	36	P20673;Q4QRB8	Asl	Argininosuccinate lyase	ARLY_RAT;Q4QRB8_RAT	8	10.5956	1.10596
PP / VP	F1LZX5	F1LZX5	0.15709	0.15709	0.0665481	0.502243	16	F1LZX5	Hectd4	HECT domain E3 ubiquitin protein ligase 4	F1LZX5_RAT	4	11.5036	1.11504
PP / VP	F1M589	F1M589	NaN	NaN	0.0671315	0.502243	4	F1M589	Pml	Promyelocytic leukemia	F1M589_RAT	1	NaN	NaN	PP	VP	NaN	NaN	NaN
PP / VP	D3ZTH8;F1LT35;P62752	D3ZTH8;F1LT35;P62752	0.0308461	0.0308461	0.069306	0.509839	52	D3ZTH8;F1LT35;P62752	LOC689899;RGD1564606;Rpl23a	Similar to 60S ribosomal protein L23a;Similar to 60S ribosomal protein L23a;60S ribosomal protein L23a	D3ZTH8_RAT;F1LT35_RAT;RL23A_RAT	8	2.16111	1.02161
PP / VP	P50554	P50554	0.0220887	0.0220887	0.0694087	0.509839	136	P50554	Abat	4-aminobutyrate aminotransferase, mitochondrial	GABT_RAT	23	1.54285	1.01543
PP / VP	Q3MIE4	Q3MIE4	-0.0339613	0.0339613	0.0691569	0.509839	132	Q3MIE4	Vat1	Synaptic vesicle membrane protein VAT-1 homolog	VAT1_RAT	20	-2.32653	0.976735
PP / VP	B0BNE5	B0BNE5	-0.0380293	0.0380293	0.068833	0.509839	56	B0BNE5	Esd	S-formylglutathione hydrolase	ESTD_RAT	11	-2.60155	0.973984
PP / VP	Q5XIQ8	Q5XIQ8	NaN	NaN	0.0683521	0.509839	8	Q5XIQ8	Chpf	Hexosyltransferase	Q5XIQ8_RAT	1	NaN	NaN	PP	VP	NaN	NaN	NaN
PP / VP	O89035	O89035	0.23069	0.23069	0.0693821	0.509839	36	O89035	Slc25a10	Mitochondrial dicarboxylate carrier	O89035_RAT	7	17.3396	1.1734
PP / VP	P51593	P51593	0.327434	0.327434	0.0693087	0.509839	8	P51593	Huwe1	E3 ubiquitin-protein ligase HUWE1 (Fragment)	HUWE1_RAT	2	25.4779	1.25478
PP / VP	D4ACG2	D4ACG2	0.317746	0.317746	0.0690161	0.509839	36	D4ACG2	Ilvbl	IlvB (Bacterial acetolactate synthase)-like (Predicted), isoform CRA_c	D4ACG2_RAT	8	24.6382	1.24638
PP / VP	P13233	P13233	-0.0993417	0.0993417	0.0700571	0.509965	140	P13233	Cnp	2',3'-cyclic-nucleotide 3'-phosphodiesterase	CN37_RAT	20	-6.65412	0.933459
PP / VP	A0A0G2K093;O35162	A0A0G2K093;O35162	-0.815967	0.815967	0.0699361	0.509965	16	A0A0G2K093;O35162	Hspa13	Heat shock 70 kDa protein 13	A0A0G2K093_RAT;HSP13_RAT	4	-43.1972	0.568028
PP / VP	G3V7W1	G3V7W1	0.121108	0.121108	0.0698977	0.509965	20	G3V7W1	Pdcd6	Programmed cell death protein 6	PDCD6_RAT	5	8.75696	1.08757
PP / VP	O88350	O88350	0.327862	0.327862	0.0699127	0.509965	16	O88350	Rbbp9	Putative hydrolase RBBP9	RBBP9_RAT	3	25.5152	1.25515
PP / VP	B2GV38	B2GV38	-0.420443	0.420443	0.0702319	0.510051	16	B2GV38	Ubl4a	Ubiquitin-like protein 4A	UBL4A_RAT	3	-25.2805	0.747195
PP / VP	P21708	P21708	-0.0300196	0.0300196	0.0705612	0.510051	72	P21708	Mapk3	Mitogen-activated protein kinase 3	MK03_RAT	15	-2.0593	0.979407
PP / VP	D3ZAQ4	D3ZAQ4	NaN	NaN	0.0707991	0.510051	4	D3ZAQ4	Psmg2	Proteasome assembly chaperone 2	D3ZAQ4_RAT	1	NaN	NaN	PP	VP	NaN	NaN	NaN
PP / VP	E9PTG8;H9KVF6	E9PTG8;H9KVF6	-0.271688	0.271688	0.0711203	0.510051	12	E9PTG8;H9KVF6	Stk10	Serine/threonine-protein kinase 10	STK10_RAT;H9KVF6_RAT	3	-17.165	0.82835
PP / VP	A0A0G2JUW8;A0A0G2JYN3;P97629	A0A0G2JUW8;A0A0G2JYN3;P97629	0.0913707	0.0913707	0.0710088	0.510051	60	A0A0G2JUW8;A0A0G2JYN3;P97629	LOC108348118;Lnpep;Lnpep	Leucyl-cystinyl aminopeptidase	A0A0G2JUW8_RAT;A0A0G2JYN3_RAT;LCAP_RAT	15	6.53819	1.06538
PP / VP	Q6AYG3	Q6AYG3	0.00589577	0.00589577	0.0711736	0.510051	48	Q6AYG3	Prune1	Exopolyphosphatase PRUNE1	PRUN1_RAT	10	0.4095	1.00409
PP / VP	A0A0G2K7M2;Q5XFX7	A0A0G2K7M2;Q5XFX7	NaN	NaN	0.0709625	0.510051	4	A0A0G2K7M2;Q5XFX7	Rad23a	RAD23 homolog A, nucleotide excision repair protein;RAD23 homolog A (S. cerevisiae)	A0A0G2K7M2_RAT;Q5XFX7_RAT	1	NaN	NaN	PP	VP	NaN	NaN	NaN
PP / VP	P62282	P62282	0.231164	0.231164	0.0716201	0.510769	68	P62282	Rps11	40S ribosomal protein S11	RS11_RAT	10	17.3782	1.17378
PP / VP	Q5PQN0	Q5PQN0	0.0531146	0.0531146	0.0717479	0.510769	20	Q5PQN0	Ncald	Neurocalcin-delta	NCALD_RAT	5	3.75024	1.0375
PP / VP	A0A0G2JV65;P63102	A0A0G2JV65;P63102	-0.0544005	0.0544005	0.071704	0.510769	72	A0A0G2JV65;P63102	Ywhaz	14-3-3 protein zeta/delta	A0A0G2JV65_RAT;1433Z_RAT	12	-3.70055	0.962995
PP / VP	P62762	P62762	0.0487108	0.0487108	0.072275	0.513391	56	P62762	Vsnl1	Visinin-like protein 1	VISL1_RAT	12	3.43402	1.03434
PP / VP	A0A0G2JSS8;Q9R063	A0A0G2JSS8;Q9R063	-0.0727817	0.0727817	0.0758059	0.514632	88	A0A0G2JSS8;Q9R063	Prdx5	Peroxiredoxin;Peroxiredoxin-5, mitochondrial	A0A0G2JSS8_RAT;PRDX5_RAT	13	-4.91971	0.950803
PP / VP	A0A0G2K9A2;P85970	A0A0G2K9A2;P85970	0.0365144	0.0365144	0.0758001	0.514632	128	A0A0G2K9A2;P85970	Arpc2	Arp2/3 complex 34 kDa subunit;Actin-related protein 2/3 complex subunit 2	A0A0G2K9A2_RAT;ARPC2_RAT	20	2.56329	1.02563
PP / VP	P17136;P63164	P17136;P63164	0.0048076	0.0048076	0.0729961	0.514632	28	P17136;P63164	Snrpb;Snrpn	Small nuclear ribonucleoprotein-associated protein B;Small nuclear ribonucleoprotein-associated protein N	RSMB_RAT;RSMN_RAT	7	0.333793	1.00334
PP / VP	Q5XI07	Q5XI07	-2.05394	2.05394	0.0730645	0.514632	52	Q5XI07	Lpp	Lipoma-preferred partner homolog	LPP_RAT	10	-75.9175	0.240825
PP / VP	D3ZWC6	D3ZWC6	-0.112849	0.112849	0.0737462	0.514632	120	D3ZWC6	Sntb1	Syntrophin, basic 1 (Predicted)	D3ZWC6_RAT	20	-7.52402	0.92476
PP / VP	F1M7N2;O35795	F1M7N2;O35795	0.142484	0.142484	0.0761121	0.514632	36	F1M7N2;O35795	Entpd2	Ectonucleoside triphosphate diphosphohydrolase 2	F1M7N2_RAT;ENTP2_RAT	6	10.3804	1.1038
PP / VP	O35112	O35112	-0.0875516	0.0875516	0.0737435	0.514632	100	O35112	Alcam	CD166 antigen	CD166_RAT	17	-5.88814	0.941119
PP / VP	A0JPQ5;M0R635;Q4V8K3	A0JPQ5;M0R635;Q4V8K3	0.0587044	0.0587044	0.0737212	0.514632	24	A0JPQ5;M0R635;Q4V8K3	RGD1560212;LOC100909833;Naa11	Similar to DNA segment, Chr 18, Wayne State University 98, expressed (Predicted), isoform CRA_c;N-alpha-acetyltransferase 11-like;N-alpha-acetyltransferase 11	A0JPQ5_RAT;M0R635_RAT;NAA11_RAT	4	4.153	1.04153
PP / VP	F1LN59	F1LN59	0.0115679	0.0115679	0.0737853	0.514632	72	F1LN59	Eif4g2	Eukaryotic translation initiation factor 4, gamma 2	F1LN59_RAT	17	0.805051	1.00805
PP / VP	P97852;Q6IN39	P97852;Q6IN39	0.0338971	0.0338971	0.0747837	0.514632	92	P97852;Q6IN39	Hsd17b4	Peroxisomal multifunctional enzyme type 2;Hsd17b4 protein	DHB4_RAT;Q6IN39_RAT	21	2.37739	1.02377
PP / VP	Q4KMA2	Q4KMA2	0.178809	0.178809	0.0745389	0.514632	36	Q4KMA2	Rad23b	UV excision repair protein RAD23 homolog B	RD23B_RAT	7	13.1949	1.13195
PP / VP	Q05962;Q6P9Y4	Q05962;Q6P9Y4	0.020194	0.020194	0.0750566	0.514632	44	Q05962;Q6P9Y4	Slc25a4	ADP/ATP translocase 1	ADT1_RAT;Q6P9Y4_RAT	7	1.40959	1.0141
PP / VP	Q642E6;Q9EQV6	Q642E6;Q9EQV6	0.292652	0.292652	0.0728307	0.514632	12	Q642E6;Q9EQV6	Tpp1	Tripeptidyl peptidase I;Tripeptidyl-peptidase 1	Q642E6_RAT;TPP1_RAT	2	22.489	1.22489
PP / VP	Q5BJT0	Q5BJT0	-0.222487	0.222487	0.0754387	0.514632	8	Q5BJT0	Arglu1	Arginine and glutamate-rich protein 1	ARGL1_RAT	2	-14.2913	0.857087
PP / VP	A0A0G2K4V4;D3Z9P1	A0A0G2K4V4;D3Z9P1	-0.461891	0.461891	0.0759534	0.514632	8	A0A0G2K4V4;D3Z9P1	Kdsr	3-ketodihydrosphingosine reductase	A0A0G2K4V4_RAT;D3Z9P1_RAT	2	-27.3966	0.726034
PP / VP	A0A0G2JXP3;F1LRN8	A0A0G2JXP3;F1LRN8	0.0611892	0.0611892	0.0741344	0.514632	28	A0A0G2JXP3;F1LRN8	Nedd4l	Neural precursor cell-expressed, developmentally down-regulated 4-like, E3 ubiquitin protein ligase;Neural precursor cell-expressed, developmentally down-regulated 4-like, E3 ubiquitin protein ligase	A0A0G2JXP3_RAT;F1LRN8_RAT	7	4.33254	1.04333
PP / VP	A0A0G2K7T6;F1LS02;P37199	A0A0G2K7T6;F1LS02;P37199	0.381483	0.381483	0.0752436	0.514632	12	A0A0G2K7T6;F1LS02;P37199	Nup155	Nuclear pore complex protein Nup155	A0A0G2K7T6_RAT;F1LS02_RAT;NU155_RAT	3	30.268	1.30268
PP / VP	A0A0A0MXX5;D4A1J4	A0A0A0MXX5;D4A1J4	NaN	NaN	0.0740519	0.514632	4	A0A0A0MXX5;D4A1J4	Bdh2	3-hydroxybutyrate dehydrogenase type 2	A0A0A0MXX5_RAT;BDH2_RAT	1	NaN	NaN	PP	VP	NaN	NaN	NaN
PP / VP	A0A0G2K5E4	A0A0G2K5E4	0.27431	0.27431	0.07407	0.514632	24	A0A0G2K5E4	Dnaja3	DnaJ heat shock protein family (Hsp40) member A3	A0A0G2K5E4_RAT	6	20.9415	1.20942
PP / VP	A0A0A0MY22;P82450	A0A0A0MY22;P82450	0.223063	0.223063	0.0743039	0.514632	12	A0A0A0MY22;P82450	Siae	Sialate O-acetylesterase	A0A0A0MY22_RAT;SIAE_RAT	3	16.7209	1.16721
PP / VP	F1M9B2	F1M9B2	NaN	NaN	0.0749906	0.514632	4	F1M9B2	Igfbp7	Insulin-like growth factor binding protein 7, isoform CRA_b	F1M9B2_RAT	1	NaN	NaN	PP	VP	NaN	NaN	NaN
PP / VP	D4AAT4	D4AAT4	NaN	NaN	0.075035	0.514632	8	D4AAT4	Snrpf	RCG48672	D4AAT4_RAT	1	NaN	NaN	PP	VP	NaN	NaN	NaN
PP / VP	A0A0G2JTE7;A0A0G2K1F7	A0A0G2JTE7;A0A0G2K1F7	0.686045	0.686045	0.0758046	0.514632	8	A0A0G2JTE7;A0A0G2K1F7	Myo15a	Myosin XVA	A0A0G2JTE7_RAT;A0A0G2K1F7_RAT	2	60.8867	1.60887
PP / VP	P62138	P62138	0.113056	0.113056	0.0768382	0.517378	68	P62138	Ppp1ca	Serine/threonine-protein phosphatase PP1-alpha catalytic subunit	PP1A_RAT	13	8.15165	1.08152
PP / VP	Q80ZA3	Q80ZA3	-0.0810902	0.0810902	0.0766967	0.517378	48	Q80ZA3	Serpinf1	Alpha-2 antiplasmin	Q80ZA3_RAT	10	-5.4657	0.945343
PP / VP	P25304	P25304	-0.107035	0.107035	0.0770072	0.517437	80	P25304	Agrn	Agrin	AGRIN_RAT	19	-7.15055	0.928495
PP / VP	B0BNG3	B0BNG3	0.216851	0.216851	0.0776817	0.518156	48	B0BNG3	Lman2	Lectin, mannose-binding 2	B0BNG3_RAT	10	16.2194	1.16219
PP / VP	G3V792	G3V792	0.140394	0.140394	0.0776421	0.518156	44	G3V792	Dync1i1	Cytoplasmic dynein 1 intermediate chain 1	G3V792_RAT	10	10.2206	1.10221
PP / VP	Q5M7A7	Q5M7A7	-0.361567	0.361567	0.0776248	0.518156	12	Q5M7A7	Cnrip1	CB1 cannabinoid receptor-interacting protein 1	CNRP1_RAT	3	-22.1681	0.778319
PP / VP	F1MAD2	F1MAD2	NaN	NaN	0.0777555	0.518156	4	F1MAD2	Patj	PATJ, crumbs cell polarity complex component	F1MAD2_RAT	1	NaN	NaN	PP	VP	NaN	NaN	NaN
PP / VP	E9PT66	E9PT66	0.0884918	0.0884918	0.0779731	0.518537	64	E9PT66	Sf3b3	Splicing factor 3b, subunit 3	E9PT66_RAT	15	6.32581	1.06326
PP / VP	Q63159	Q63159	-0.0959423	0.0959423	0.0781897	0.51891	12	Q63159	Coq3	Ubiquinone biosynthesis O-methyltransferase, mitochondrial	COQ3_RAT	3	-6.43391	0.935661
PP / VP	Q4G061	Q4G061	0.15953	0.15953	0.0785017	0.519545	159	Q4G061	Eif3b	Eukaryotic translation initiation factor 3 subunit B	EIF3B_RAT	30	11.6923	1.11692
PP / VP	A0A0G2K8N6;D3ZC34	A0A0G2K8N6;D3ZC34	0.0836329	0.0836329	0.0786069	0.519545	20	A0A0G2K8N6;D3ZC34	Ankmy2	Ankyrin repeat and MYND domain-containing 2;Ankyrin repeat and MYND domain containing 2 (Predicted)	A0A0G2K8N6_RAT;D3ZC34_RAT	3	5.96831	1.05968
PP / VP	P04639	P04639	0.267813	0.267813	0.0796824	0.519703	88	P04639	Apoa1	Apolipoprotein A-I	APOA1_RAT	13	20.3981	1.20398
PP / VP	Q6P7S1	Q6P7S1	0.0839757	0.0839757	0.0804931	0.519703	48	Q6P7S1	Asah1	Acid ceramidase	ASAH1_RAT	11	5.99349	1.05993
PP / VP	A0A0G2JTV2;G3V9E3;Q62736	A0A0G2JTV2;G3V9E3;Q62736	0.0456295	0.0456295	0.0792174	0.519703	92	A0A0G2JTV2;G3V9E3;Q62736	Cald1	Non-muscle caldesmon;Caldesmon 1, isoform CRA_b;Non-muscle caldesmon	A0A0G2JTV2_RAT;G3V9E3_RAT;CALD1_RAT	13	3.21334	1.03213
PP / VP	G3V644	G3V644	-0.307735	0.307735	0.0798638	0.519703	56	G3V644	Ndufv3	NADH dehydrogenase (Ubiquinone) flavoprotein 3-like, isoform CRA_a	G3V644_RAT	8	-19.2091	0.807909
PP / VP	Q5HZY2	Q5HZY2	0.575568	0.575568	0.0795226	0.519703	20	Q5HZY2	Sar1b	GTP-binding protein SAR1b	SAR1B_RAT	4	49.0264	1.49026
PP / VP	D3ZCD4;P53812	D3ZCD4;P53812	-0.0833734	0.0833734	0.0802731	0.519703	12	D3ZCD4;P53812	Pitpnb	Phosphatidylinositol transfer protein beta isoform	D3ZCD4_RAT;PIPNB_RAT	3	-5.61519	0.943848
PP / VP	P20767	P20767	0.0200107	0.0200107	0.080882	0.519703	24	P20767	NaN	Ig lambda-2 chain C region	LAC2_RAT	5	1.3967	1.01397
PP / VP	Q5M7A4	Q5M7A4	0.0621112	0.0621112	0.0802488	0.519703	24	Q5M7A4	Uba5	Ubiquitin-like modifier-activating enzyme 5	UBA5_RAT	6	4.39924	1.04399
PP / VP	F2Z3T9	F2Z3T9	0.0926674	0.0926674	0.0806506	0.519703	52	F2Z3T9	U2af2	U2 snRNP auxiliary factor large subunit	F2Z3T9_RAT	9	6.63399	1.06634
PP / VP	Q56R17	Q56R17	-0.0989943	0.0989943	0.0799362	0.519703	16	Q56R17	Kpna4	Importin subunit alpha	Q56R17_RAT	3	-6.63164	0.933684
PP / VP	P83888	P83888	-0.294248	0.294248	0.0807813	0.519703	12	P83888	Tubg1	Tubulin gamma-1 chain	TBG1_RAT	4	-18.4503	0.815497
PP / VP	A0A0G2K613;Q9EPH2	A0A0G2K613;Q9EPH2	NaN	NaN	0.0791444	0.519703	4	A0A0G2K613;Q9EPH2	;Marcksl1	Uncharacterized protein;MARCKS-related protein	A0A0G2K613_RAT;MRP_RAT	1	NaN	NaN	PP	VP	NaN	NaN	NaN
PP / VP	B2GUZ5	B2GUZ5	0.052881	0.052881	0.0806942	0.519703	36	B2GUZ5	Capza1	F-actin-capping protein subunit alpha-1	CAZA1_RAT	8	3.73344	1.03733
[truncated: 3,335 more rows]
